# Supplementary material
Source: PubMed Central journal article supplement (PMC3083468)

Supporting Information for:

**Aerobic Palladium-Catalyzed  $sp^3$  C–H Olefination: A Route to Both N-Heterocyclic Scaffolds and Alkenes**

Kara J. Stowers, Kevin C. Fortner and Melanie S. Sanford\*

*University of Michigan, Dept. of Chemistry, 930 N. University Ave, Ann Arbor, MI 48109 (USA)*

**Table of Contents**

|                                                                            |          |
|----------------------------------------------------------------------------|----------|
| <b>I. General Procedures/Materials and Methods</b>                         | S2       |
| <b>II. Synthesis and Characterization of Substrates S1, S3-S11</b>         | S3-S5    |
| <b>III. Optimization of Reaction Conditions</b>                            | S6       |
| <b>IV. Synthesis and Characterization of Cyclized Products 1-11, P1-P5</b> | S7-S14   |
| <b>V. Reductions of Pyridinium Salts</b>                                   | S15-S17  |
| <b>VI. Formation of the Linear Heck Products</b>                           | S18-S19  |
| <b>VII. Derivatizations of the Linear Heck Products</b>                    | S20-S24  |
| <b>VIII. References</b>                                                    | S25      |
| <b>IX. NMR Spectra</b>                                                     | S26-S113 |

**List of Figures and Tables**

|                                                                          |     |
|--------------------------------------------------------------------------|-----|
| <b>Table S1.</b> Optimization of reaction conditions for S1              | S6  |
| <b>Table S2.</b> Optimization of reaction conditions for 2-ethylpyridine | S6  |
| <b>Table S3.</b> Screening of other oxidants                             | S6  |
| <b>Figure S1.</b> Observed nOes for <b>5</b>                             | S10 |
| <b>Figure S2.</b> Observed nOes for <b>12</b>                            | S15 |
| <b>Figure S3.</b> Observed nOes for <b>13B</b>                           | S17 |
| <b>Figure S4.</b> Comparison of Mosher esters of <b>16</b>               | S23 |

## IA. General Procedures

NMR spectra were obtained on a Varian Inova 400 (399.96 MHz for  $^1\text{H}$ ; 100.57 MHz for  $^{13}\text{C}$ ; 376.34 MHz for  $^{19}\text{F}$ ) unless otherwise noted.  $^1\text{H}$  NMR chemical shifts are reported in parts per million (ppm) relative to TMS, with the residual solvent peak used as an internal reference. The chloroform reference peak is set to 7.26 ppm for  $^1\text{H}$  and 77.23 ppm for  $^{13}\text{C}$ . In the case of benzene, the reference peak is set to 7.16 ppm for  $^1\text{H}$ . Deuterated methanol is set to a reference peak of 3.31 ppm for  $^1\text{H}$  and 49.00 ppm for  $^{13}\text{C}$ . Multiplicities are reported as follows: singlet (s), doublet (d), doublet of doublets (dd), doublet of doublets of doublets (ddd), doublet of triplets (dt), triplet (t), quartet (q), quintet (quin), multiplet (m), and broad resonance (br). Apparent splitting is indicated with the abbreviation app. IR spectra were obtained on a Perkin-Elmer spectrum BX FT-IR spectrometer. Melting points were determined with a Mel-Temp 3.0 (Laboratory Devices Inc) and are uncorrected. HRMS data were obtained on a Micromass AutoSpec Ultima Magnetic Sector mass spectrometer. Optical rotations were measured on a Rudolph Research Autopol III automatic polarimeter.

## IB. Materials and Methods

$\text{Pd}(\text{OAc})_2$  was obtained from Pressure Chemical and used as received, and the polyoxometalates ( $\text{H}_6[\text{PMo}_9\text{V}_3\text{O}_{40}]^1$ , and  $\text{H}_4[\text{PMo}_{11}\text{VO}_{40}]^2$ ) were synthesized according to literature procedures. Alkyl acrylates were obtained from Aldrich and used as received unless otherwise noted. Benzyl acrylate was synthesized according to literature procedure.<sup>3</sup> 2-Ethyl pyridine (**S2**) was purchased from Aldrich and used as received. Solvents were obtained from Fisher Chemical and used without further purification unless otherwise noted. THF was purified using an Innovative Technology (IT) solvent purification system composed of activated alumina, copper catalyst, and molecular sieves. Flash chromatography was performed on EM Science silica gel 60 (0.040–0.063 mm particle size, 230–400 mesh). Thin layer chromatography was performed on Merck TLC plates pre-coated with silica gel 60 F254 or on Baker-flex Aluminum Oxide-IB flexible sheets where noted.

## II. Synthesis and Characterization of Substrates S1, S3-S11

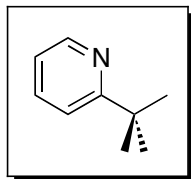

Substrate **S1** was prepared by Cu-catalyzed coupling between 2-bromopyridine (Aldrich) and <sup>t</sup>BuMgCl (Alfa Aesar) using a literature procedure.<sup>4</sup> **S1** was obtained as a yellow oil ( $R_f = 0.29$  in 95:5 pentanes/Et<sub>2</sub>O). Spectral data (<sup>1</sup>H NMR (CDCl<sub>3</sub>) and <sup>13</sup>C{<sup>1</sup>H} NMR (CDCl<sub>3</sub>)) for **S1** matched those reported in the literature.<sup>5</sup>

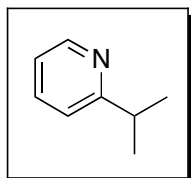

Substrate **S3** was prepared by alkylation of 2-ethylpyridine (Aldrich) with iodomethane (Aldrich) according to a literature procedure.<sup>5</sup> **S3** was obtained as a yellow oil ( $R_f = 0.16$  in 95:5 pentanes/Et<sub>2</sub>O). Spectral data (<sup>1</sup>H NMR (CDCl<sub>3</sub>) and <sup>13</sup>C{<sup>1</sup>H} NMR (CDCl<sub>3</sub>)) for **S3** matched those reported in the literature.<sup>5</sup>

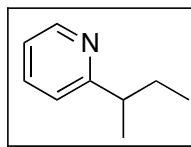

Substrate **S4** was prepared by alkylation of 2-*n*-propylpyridine (Lancaster Synthesis Inc.) with iodomethane (Aldrich) using a literature procedure.<sup>5</sup> **S4** was obtained as a yellow oil ( $R_f = 0.3$  in 90:10 hexanes/ethyl acetate). <sup>1</sup>H NMR (CDCl<sub>3</sub>):  $\delta$  8.54 (d,  $J = 4.0$  Hz, 1H), 7.59 (dd,  $J = 7.9, 7.8$  Hz, 1H), 7.13-7.07 (multiple peaks, 2H), 2.78 (tq,  $J = 7.2, 6.8$  Hz, 1H), 1.76 (d app. quin,  $J = 13.6, 7.2$  Hz, 1H), 1.63 (d app. quin,  $J = 13.6, 7.2$  Hz, 1H), 1.28 (d,  $J = 6.8$  Hz, 3H), 0.84 (t,  $J = 7.2$  Hz, 3H). <sup>13</sup>C{<sup>1</sup>H} NMR (CDCl<sub>3</sub>):  $\delta$  166.71, 149.37, 136.39, 121.78, 121.19, 43.90, 30.20, 20.60, 12.33. HRMS electrospray (m/z): [M+H]<sup>+</sup> calcd for C<sub>9</sub>H<sub>14</sub>N<sup>+</sup> 136.1121; found 136.1120.

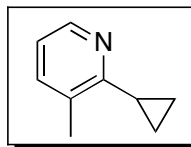

Substrate **S5** was prepared from 3-methyl-2-bromopyridine (Matrix Scientific) and cyclopropylboronic acid (Frontier Scientific) according to the literature procedure<sup>6</sup> with extended reaction time (overnight). After the reaction was complete, 3 M HCl solution was added to acidify the reaction mixture and the aqueous layer was extracted with EtOAc. The aqueous layer was basified with 3 M NaOH solution and the product was extracted with Et<sub>2</sub>O. The products were then purified by flash chromatography using 90:10 petroleum ether/Et<sub>2</sub>O. This product (**S5**) was obtained as a yellow oil ( $R_f = 0.28$  in 90:10 hexanes/ethyl acetate). <sup>1</sup>H NMR (CDCl<sub>3</sub>):  $\delta$  8.28 (d,  $J = 4.8$

Hz, 1H), 7.36 (d,  $J = 7.2$  Hz, 1H), 6.93 (dd,  $J = 7.2, 4.8$  Hz, 1H), 2.41 (s, 3H), 2.08 (tt,  $J = 9.6, 5.2$  Hz, 1H), 1.06 (m, 2H), 0.95 (m, 2H).  $^{13}\text{C}\{^1\text{H}\}$  NMR ( $\text{CDCl}_3$ ):  $\delta$  160.67, 146.77, 136.97, 131.20, 120.29, 19.06, 13.75, 9.00. HRMS electrospray ( $m/z$ ):  $[\text{M}-\text{H}]^+$  calcd for  $\text{C}_9\text{H}_{10}\text{N}^+$  132.0813; found 132.0816.

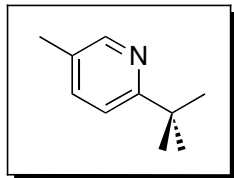

Substrate **S6** was prepared by Cu-catalyzed coupling between 2-bromo-5-methylpyridine (Matrix Scientific) and  $t\text{BuMgCl}$  using a literature procedure.<sup>4</sup> **S6** was obtained as a pale yellow oil ( $R_f = 0.32$  in 95:5 pentanes/ $\text{Et}_2\text{O}$ ).  $^1\text{H}$  NMR ( $\text{CDCl}_3$ ):  $\delta$  8.38 (d,  $J = 2.4$  Hz, 1H), 7.41 (dd,  $J = 8.0, 2.4$  Hz 1H), 7.22 (d,  $J = 8.0$  Hz, 1H), 2.28 (s, 3H), 1.35 (s, 9H).  $^{13}\text{C}\{^1\text{H}\}$  NMR ( $\text{CDCl}_3$ ):  $\delta$  166.67, 149.20, 136.88, 129.87, 118.70, 37.16, 30.47, 18.14. HRMS electrospray ( $m/z$ ):  $[\text{M}+\text{H}]^+$  calcd for  $\text{C}_{10}\text{H}_{16}\text{N}^+$  150.1277; found 150.1275.

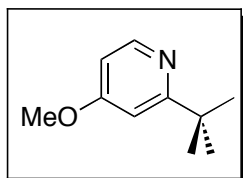

Substrate **S7** was prepared by double alkylation<sup>5</sup> using iodomethane (Aldrich) of 2-ethyl-4-methoxypyridine prepared according to a literature procedure.<sup>7</sup> **S7** was obtained as a yellow oil ( $R_f = 0.30$  in 90:10 hexanes/ethyl acetate).  $^1\text{H}$  NMR ( $\text{CDCl}_3$ ):  $\delta$  8.40 (d,  $J = 5.6$  Hz, 1H), 6.85 (s, 1H) 6.63 (d,  $J = 5.6$  Hz, 1H), 3.84 (s, 3H), 1.35 (s, 9H).  $^{13}\text{C}\{^1\text{H}\}$  NMR ( $\text{CDCl}_3$ ):  $\delta$  171.33, 166.18, 150.19, 106.42, 105.94, 55.15, 37.55, 30.32. HRMS electrospray ( $m/z$ ):  $[\text{M}+\text{H}]^+$  calcd for  $\text{C}_{10}\text{H}_{16}\text{NO}^+$  166.1226; found 166.1224.

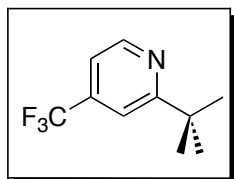

Substrate **S8** was prepared by Cu-catalyzed coupling between 2-bromo-4-trifluoromethylpyridine (Matrix Scientific) and  $t\text{BuMgCl}$  using a literature procedure.<sup>4</sup> **S8** was obtained as a yellow oil ( $R_f = 0.3$  in 97:3 pentanes/ $\text{Et}_2\text{O}$ ).  $^1\text{H}$  NMR ( $\text{CDCl}_3$ ):  $\delta$  8.73 (d,  $J = 4.8$  Hz, 1H), 7.53 (s, 1H), 7.31 (d,  $J = 4.8$  Hz, 1H), 1.40 (s, 9H).  $^{13}\text{C}\{^1\text{H}\}$  NMR ( $\text{CDCl}_3$ ):  $\delta$  171.34, 149.85, 138.70 (q,  $^2J_{\text{CF}} = 34.0$  Hz), 123.42 (q,  $^1J_{\text{CF}} = 271.0$  Hz), 116.52 (q,  $^3J_{\text{CF}} = 4.0$  Hz) 114.94 (q,  $^3J_{\text{CF}} = 4.0$  Hz), 38.13, 30.26.  $^{19}\text{F}\{^1\text{H}\}$  NMR ( $\text{CDCl}_3$ ):  $\delta$  -64.84. HRMS electrospray ( $m/z$ ):  $[\text{M}+\text{H}]^+$  calcd for  $\text{C}_{10}\text{H}_{13}\text{F}_3\text{N}^+$  204.0995; found 204.0994.



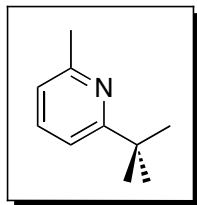

Substrate **S9** was prepared by Cu-catalyzed coupling between 2-bromo-6-methylpyridine (Matrix Scientific) and <sup>t</sup>BuMgCl using a literature procedure.<sup>4</sup> **S9** was obtained as a yellow oil ( $R_f = 0.32$  in 95:5 pentanes/Et<sub>2</sub>O). <sup>1</sup>H NMR (CDCl<sub>3</sub>): δ 7.47 (app. t,  $J = 7.6$ , Hz, 1H), 7.12 (d,  $J = 7.6$  Hz, 1H), 6.92 (d,  $J = 7.6$ , 1H), 2.28 (s, 3H), 1.35 (s, 9H). <sup>13</sup>C{<sup>1</sup>H} NMR (CDCl<sub>3</sub>): δ 168.84, 157.22, 136.32, 120.12, 115.83, 37.46, 30.45, 25.00. HRMS electrospray (m/z): [M+H]<sup>+</sup> calcd for C<sub>10</sub>H<sub>16</sub>N<sup>+</sup> 150.1277; found 150.1276.

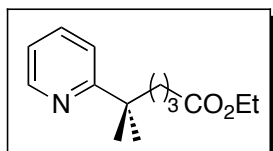

Substrate **S10** was prepared by hydrogenation (10 mol % Pd/C, 0.2 M EtOH, rt, 8 h, 90% yield) of **14**. **S10** was obtained as a colorless oil ( $R_f = 0.25$  in 90:10 hexanes/ethyl acetate). <sup>1</sup>H NMR (CDCl<sub>3</sub>): δ 8.57 (m, 1H), 7.60 (ddd,  $J = 7.4, 6.0, 1.2$  Hz, 1H), 7.29 (dd,  $J = 8.0, 1.6$  Hz, 1H), 7.08 (ddd,  $J = 7.6, 4.8, 1.2$ , 1H), 4.09 (q,  $J = 7.2$  Hz, 2H), 2.21 (t,  $J = 7.6$  Hz, 2H), 1.74 (m, 2H), 1.40 (m, 2H), 1.36 (s, 6H), 1.23 (t,  $J = 7.2$  Hz, 3H). <sup>13</sup>C{<sup>1</sup>H} NMR (CDCl<sub>3</sub>): δ 173.92, 168.06, 148.95, 136.26, 120.85, 120.09, 60.36, 42.93, 40.53, 35.01, 28.02, 20.58, 14.44. IR (thin film): 1735 cm<sup>-1</sup>. HRMS electrospray (m/z): [M+H]<sup>+</sup> calcd for C<sub>14</sub>H<sub>22</sub>NO<sub>2</sub><sup>+</sup> 236.1645; found 236.1653.

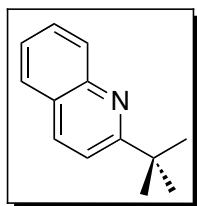

Substrate **S11** was prepared by triple alkylation of quinaldine (Alfa Aesar) with iodomethane (Aldrich) using a literature procedure.<sup>5</sup> **S11** was obtained as a yellow oil ( $R_f = 0.3$  in 90:10 hexanes/ethyl acetate). <sup>1</sup>H NMR (CDCl<sub>3</sub>): δ 8.07 (d,  $J = 8.8$  Hz, 1H), 8.06 (d,  $J = 8.4$  Hz, 1H), 7.76 (dd,  $J = 8.2, 1.2$  Hz, 1H), 7.69 (ddd,  $J = 8.4, 6.8, 1.6$  Hz, 1H), 7.53 (d,  $J = 8.4$  Hz, 1H), 7.47 (ddd,  $J = 8.4, 6.8, 1.2$  Hz, 1H), 1.48 (s, 9H). <sup>13</sup>C{<sup>1</sup>H} NMR (CDCl<sub>3</sub>): δ 169.45, 147.63, 136.04, 129.63, 129.17, 127.42, 126.64, 125.81, 118.42, 38.33, 30.35. HRMS electrospray (m/z): [M+H]<sup>+</sup> calcd for C<sub>13</sub>H<sub>16</sub>N<sup>+</sup> 186.1277; found 186.1276.

### III. Optimization of Reaction Conditions

**Table S1.** Optimization of catalyst, polyoxometalate, additives and O<sub>2</sub> for S1

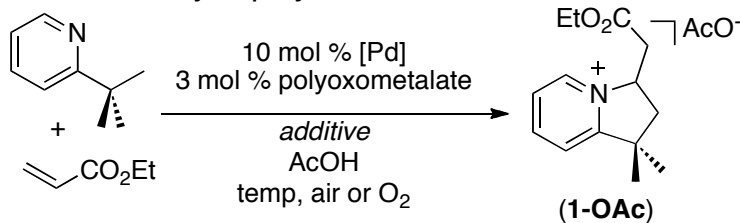

| Entry | [Pd]                                                  | Polyoxometalate                                                   | Additives                       | O <sub>2</sub> or Air | Temperature | Yield |
|-------|-------------------------------------------------------|-------------------------------------------------------------------|---------------------------------|-----------------------|-------------|-------|
| 1     | Pd(OAc) <sub>2</sub>                                  | H <sub>4</sub> [PMo <sub>11</sub> VO <sub>40</sub> ]              | 10 mol % acac<br>8 mol % NaOAc  | O <sub>2</sub>        | 90 °C       | 49%   |
| 2     | Pd(OAc) <sub>2</sub>                                  | H <sub>4</sub> [PMo <sub>11</sub> VO <sub>40</sub> ]              | 10 mol % acac<br>8 mol % NaOAc  | air                   | 90 °C       | 40%   |
| 3     | Pd(OAc) <sub>2</sub>                                  | H <sub>4</sub> [PMo <sub>11</sub> VO <sub>40</sub> ]              | 10 mol % acac<br>10 mol % NaOAc | O <sub>2</sub>        | 110 °C      | 81%   |
| 4     | Pd(OAc) <sub>2</sub>                                  | H <sub>4</sub> [PMo <sub>11</sub> VO <sub>40</sub> ]              | 10 mol % acac<br>10 mol % NaOAc | air                   | 110 °C      | 83%   |
| 5     | Pd(OAc) <sub>2</sub>                                  | H <sub>4</sub> [PMo <sub>11</sub> VO <sub>40</sub> ]              | None                            | air                   | 110 °C      | 89%   |
| 6     | Pd(MeCN) <sub>4</sub> (BF <sub>4</sub> ) <sub>2</sub> | H <sub>6</sub> [PMo <sub>9</sub> V <sub>3</sub> O <sub>40</sub> ] | 10 mol % NaOAc,                 | air                   | 110 °C      | 78%   |
| 7     | Pd(MeCN) <sub>4</sub> (BF <sub>4</sub> ) <sub>2</sub> | H <sub>4</sub> [PMo <sub>11</sub> VO <sub>40</sub> ]              | 10 mol % NaOAc                  | air                   | 110 °C      | 92%   |

**Table S2.** Optimization of catalyst, polyoxometalate, additives and O<sub>2</sub> for 2-ethylpyridine

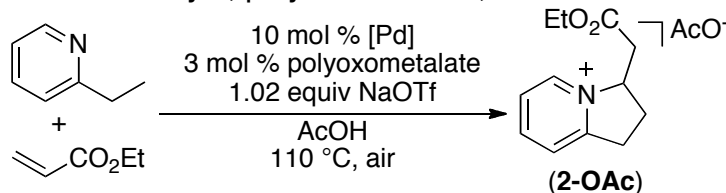

| Entry | [Pd]                                                  | Polyoxometalate                                                   | Yield |
|-------|-------------------------------------------------------|-------------------------------------------------------------------|-------|
| 1     | Pd(OAc) <sub>2</sub>                                  | None                                                              | 6%    |
| 2     | PdCl <sub>2</sub>                                     | H <sub>4</sub> [PMo <sub>11</sub> VO <sub>40</sub> ]              | 0%    |
| 3     | Pd <sub>2</sub> (dba) <sub>3</sub>                    | H <sub>4</sub> [PMo <sub>11</sub> VO <sub>40</sub> ]              | 39%   |
| 4     | Pd(OTf) <sub>2</sub>                                  | H <sub>4</sub> [PMo <sub>11</sub> VO <sub>40</sub> ]              | 53%   |
| 5     | Pd(OAc) <sub>2</sub>                                  | H <sub>4</sub> [PMo <sub>11</sub> VO <sub>40</sub> ]              | 68%   |
| 6     | Pd(MeCN) <sub>4</sub> (BF <sub>4</sub> ) <sub>2</sub> | H <sub>6</sub> [PMo <sub>9</sub> V <sub>3</sub> O <sub>40</sub> ] | 88%   |
| 7     | Pd(MeCN) <sub>4</sub> (BF <sub>4</sub> ) <sub>2</sub> | H <sub>4</sub> [PMo <sub>11</sub> VO <sub>40</sub> ]              | 89%   |

**Table S3.** Screening of other oxidants

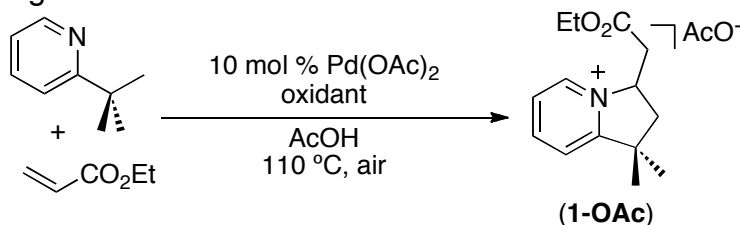

| Entry | Oxidant                                                      | Yield       |
|-------|--------------------------------------------------------------|-------------|
| 1     | <i>t</i> -butyl hydroperoxide                                | No reaction |
| 2     | benzoquinone                                                 | 25%         |
| 3     | 10 mol % Cu(OAc) <sub>2</sub>                                | 28%         |
| 4     | 3 mol % H <sub>4</sub> [PMo <sub>11</sub> VO <sub>40</sub> ] | 75%         |

#### IV. Synthesis and Characterization of Cyclized Products 1-11, P1-P5

**Standard Procedure A.** In a 40 mL vial in air, NaOAc (2.1 mg, 0.025 mmol, 0.1 equiv), Pd(MeCN)<sub>4</sub>(BF<sub>4</sub>)<sub>2</sub> (11.11 mg, 0.025 mmol, 0.10 equiv) and H<sub>4</sub>[PMo<sub>11</sub>VO<sub>40</sub>] (13.36 mg, 0.0075 mmol, 0.03 equiv) were combined in AcOH (2 mL). The alkene (1.25 mmol, 5.0 equiv) was added, followed by addition of substrate (0.25 mmol, 1.0 equiv), after which the vial was sealed with a Teflon-lined cap, and the resulting solution was heated at 110 °C for 18 h. The reaction was then cooled to room temperature and filtered through a short celite plug, which was washed with MeOH (1 mL). The AcOH and MeOH were removed under reduced pressure, and the remaining salts were dried under vacuum. Water (1 mL) was added to dissolve the cyclized product and the solution was filtered through a short celite plug to remove the polyoxometalate and catalyst. The celite was rinsed with 1 mL of water. The water layers were combined and the water was removed under reduced pressure followed by addition of 1 mL of saturated aqueous solution of NaBF<sub>4</sub> to exchange the AcO<sup>-</sup> counterion. The organic BF<sub>4</sub><sup>-</sup> salt was then extracted into CH<sub>2</sub>Cl<sub>2</sub> (5 x 2 mL). The CH<sub>2</sub>Cl<sub>2</sub> layers were combined and dried with MgSO<sub>4</sub>. The solvent was removed under reduced pressure to provide the product.

**Standard Procedure B.** In a 40 mL vial in air, NaOTf (47.3 mg, 0.275 mmol, 1.1 equiv), Pd(MeCN)<sub>4</sub>(BF<sub>4</sub>)<sub>2</sub> (11.11 mg, 0.025 mmol, 0.10 equiv) and H<sub>4</sub>[PMo<sub>11</sub>VO<sub>40</sub>] (13.36 mg, 0.0075 mmol, 0.03 equiv) were combined in AcOH (2 mL). The alkene (1.25 mmol, 5.0 equiv) was added followed by addition of substrate (0.25 mmol, 1.0 equiv), after which the vial was sealed with a Teflon-lined cap, and the resulting solution was heated at 110 °C for 18 h. The reaction was then cooled to room temperature and filtered through a short celite plug, which was washed with MeOH (1 mL). The AcOH and MeOH were removed under reduced pressure, and the remaining salts were dried under vacuum. Water (1 mL) was added to dissolve the cyclized product and the solution was filtered through a short celite plug to remove the polyoxometalate and catalyst. The celite was rinsed with 1 mL of water. The water layers were combined and the water was removed under reduced pressure. The remaining salt was dissolved in a saturated NaHCO<sub>3</sub> solution and the TfO<sup>-</sup> salt of the product was extracted into CH<sub>2</sub>Cl<sub>2</sub> (5 x 2 mL). The CH<sub>2</sub>Cl<sub>2</sub> layers were combined and dried with MgSO<sub>4</sub>. The solvent was removed under reduced pressure to provide the product.

Products **3-5** were isolated as inseparable mixtures of diastereomers. Analysis by COSY and HSQC allowed for assignment of the <sup>1</sup>H and <sup>13</sup>C NMR resonances associated with each diastereomer.

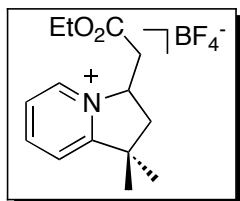

Product **1** was prepared from **S1** and ethyl acrylate using standard procedure **A** and was obtained in 90% yield as an orange oil.  $^1\text{H}$  NMR ( $\text{CDCl}_3$ ):  $\delta$  8.80 (d,  $J = 6.4$  Hz, 1H), 8.38 (app. t,  $J = 7.6$  Hz, 1H), 7.87 (dd,  $J = 7.6, 6.4$  Hz, 1H), 7.76 (d,  $J = 7.6$  Hz, 1H), 5.46 (m, 1H), 4.09 (q,  $J = 7.2$  Hz, 2H), 3.31 (dd,  $J = 17.2, 3.8$  Hz, 1H), 3.27 (dd,  $J = 17.2, 4.6$  Hz, 1H), 2.60 (dd,  $J = 13.1, 7.7$  Hz, 1H), 2.24 (dd,  $J = 13.1, 9.4$  Hz, 1H), 1.56 (s, 3H), 1.42 (s, 3H), 1.19 (t,  $J = 7.2$  Hz, 3H).  $^{13}\text{C}\{^1\text{H}\}$  NMR ( $\text{CDCl}_3$ ):  $\delta$  169.64, 165.45, 146.42, 140.26, 126.82, 122.58, 65.14, 61.73, 44.46, 42.39, 37.07, 28.44, 27.36, 14.22.  $^{19}\text{F}\{^1\text{H}\}$  NMR ( $\text{CDCl}_3$ ):  $\delta$  -152.15, -152.20. IR (thin film):  $1731\text{ cm}^{-1}$ . HRMS electrospray ( $m/z$ ):  $[\text{M}]^+$  calcd for  $\text{C}_{14}\text{H}_{20}\text{NO}_2^+$  234.1489; found 234.1488.

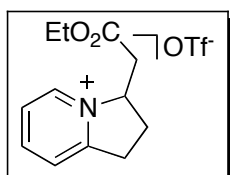

Product **2** was prepared from **S2** and ethyl acrylate using standard procedure **B** and was obtained in 89% yield as a pale yellow oil.  $^1\text{H}$  NMR ( $\text{CDCl}_3$ ):  $\delta$  8.89 (d,  $J = 6.2$  Hz, 1H), 8.29 (app. t,  $J = 7.8$  Hz, 1H), 7.85-7.80 (multiple peaks, 2H), 5.50 (m, 1H), 4.10 (dq,  $J = 10.8, 7.2$  Hz, 1H), 4.07 (dq,  $J = 10.8, 7.2$  Hz, 1H), 3.61 (dd,  $J = 19.2, 7.6$  Hz, 1H), 3.54 (dd,  $J = 19.2, 7.2$  Hz, 1H), 3.26 (dd,  $J = 17.8, 5.8$  Hz, 1H), 3.20 (dd,  $J = 17.8, 4.6$  Hz, 1H), 2.82 (m, 1H), 2.30 (m, 1H), 1.18 (t,  $J = 7.2$  Hz, 3H).  $^{13}\text{C}\{^1\text{H}\}$  NMR ( $\text{CDCl}_3$ ):  $\delta$  169.55, 159.24, 145.53, 140.64, 126.35, 125.03, 120.77 (q,  $^1J_{\text{CF}} = 318$  Hz), 67.56, 61.62, 38.10, 31.53, 26.93, 14.09.  $^{19}\text{F}\{^1\text{H}\}$  NMR ( $\text{CDCl}_3$ ):  $\delta$  -78.43. IR (thin film):  $1730\text{ cm}^{-1}$ . HRMS electrospray ( $m/z$ ):  $[\text{M}]^+$  calcd for  $\text{C}_{12}\text{H}_{16}\text{NO}_2^+$  206.1176; found 206.1172.

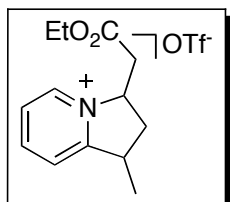

Product **3** was prepared from **S3** and ethyl acrylate using standard procedure **B** and was obtained in 81% yield as an orange oil. This compound was isolated as a 1.2:1 mixture of inseparable diastereomers.  $^1\text{H}$  NMR ( $\text{CDCl}_3$ ) *major diastereomer*:  $\delta$  8.93 (d,  $J = 5.6$  Hz, 1H), 8.35 (dd,  $J = 8.0, 7.6$  Hz, 1H), 7.88-7.80 (multiple peaks, 2H), 5.51 (m, 1H), 4.08 (q,  $J = 7.2$  Hz, 2H), 3.89 (m, 1H), 3.18-3.06 (multiple peaks, 2H), 2.54 (m, 1H), 2.44 (m, 1H), 1.48 (d,  $J = 7.2$  Hz, 3H), 1.19 (t,  $J = 7.2$  Hz, 3H). *minor diastereomer*:  $\delta$  8.83 (d,  $J = 5.6$  Hz, 1H), 8.35 (app. t,  $J = 7.6$  Hz, 1H), 7.85-7.80 (multiple peaks, 2H), 5.39 (m, 1H), 4.08 (q,  $J = 7.2$  Hz, 2H), 3.79 (m, 1H), 3.35-3.22 (multiple peaks, 2H), 2.97 (m, 1H), 1.94 (m, 1H), 1.52 (d,  $J = 6.8$  Hz, 3H), 1.19 (t,  $J = 7.2$  Hz, 3H).  $^{13}\text{C}\{^1\text{H}\}$  NMR ( $\text{CDCl}_3$ ) *major diastereomer*:  $\delta$  169.72, 162.43,

146.26, 140.83, 126.66, 124.06, 120.81 (q,  $^1J_{CF} = 318$  Hz), 66.54, 61.66, 38.40, 38.24, 35.65, 18.11, 14.14. *minor diastereomer*:  $\delta$  169.49, 162.46, 145.78, 140.02, 126.44, 123.74, 120.81 (q,  $^1J_{CF} = 318$  Hz), 66.26, 61.66, 38.18, 37.06, 36.15, 17.67, 14.14.  $^{19}\text{F}\{^1\text{H}\}$  NMR ( $\text{CDCl}_3$ ):  $\delta$  -78.35. IR (thin film):  $1732\text{ cm}^{-1}$ . HRMS electrospray (m/z):  $[\text{M}]^+$  calcd for  $\text{C}_{13}\text{H}_{18}\text{NO}_2^+$  220.1332; found 220.1331.

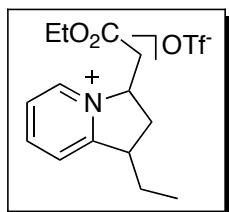

Product **4** was prepared from **S4** and ethyl acrylate using standard procedure **B** and was obtained in 55% yield as an orange oil. This compound was isolated as a 1.2:1 mixture of inseparable diastereomers.  $^1\text{H}$  NMR ( $\text{CDCl}_3$ ) *major diastereomer*:  $\delta$  8.93 (d,  $J = 6.0$  Hz, 1H), 8.41 (app. t,  $J = 8.0$  Hz, 1H), 7.91-7.84 (multiple peaks, 2H), 5.52 (m, 1H), 4.11 (d app. q,  $J = 7.2, 5.6$  Hz, 2H), 3.77 (m, 1H), 3.17-3.15 (multiple peaks, 2H), 2.53-2.49 (multiple peaks, 2H), 2.07 (m, 1H), 1.70 (m, 1H), 1.22 (t,  $J = 7.2$  Hz, 3H), 1.08 (t,  $J = 4.8$  Hz, 3H). *minor diastereomer*:  $\delta$  8.85 (d,  $J = 6.4$  Hz, 1H), 8.39 (app. t,  $J = 7.6$  Hz, 1H), 7.91-7.84 (multiple peaks, 2H), 5.40 (m, 1H), 4.11 (d app. q,  $J = 7.2, 5.6$  Hz, 2H), 3.69 (m, 1H), 3.32-3.30 (multiple peaks, 2H), 2.97 (dt,  $J = 12.8, 8.4$  Hz, 1H), 2.19 (m, 1H), 1.97 (m, 1H), 1.70 (m, 1H), 1.22 (t,  $J = 7.2$  Hz, 3H), 1.05 (t,  $J = 4.9$  Hz, 3H).  $^{13}\text{C}\{^1\text{H}\}$  NMR ( $\text{CDCl}_3$ ) *major diastereomer*:  $\delta$  169.73, 161.58, 145.91, 140.50, 126.77, 124.17, 120.80 (q,  $^1J_{CF} = 318$  Hz), 66.57, 61.68, 44.67, 38.46, 33.45, 25.64, 14.14, 11.40. *minor diastereomer*:  $\delta$  169.39, 161.48, 145.50, 141.23, 126.50, 123.82, 120.80 (q,  $^1J_{CF} = 318$  Hz), 66.31, 61.68, 44.85, 37.03, 33.06, 26.35, 14.14, 11.50.  $^{19}\text{F}\{^1\text{H}\}$  NMR ( $\text{CDCl}_3$ ):  $\delta$  -78.40. IR (thin film):  $1733\text{ cm}^{-1}$ . HRMS electrospray (m/z):  $[\text{M}]^+$  calcd for  $\text{C}_{14}\text{H}_{20}\text{NO}_2^+$  234.1486; found 234.1489.

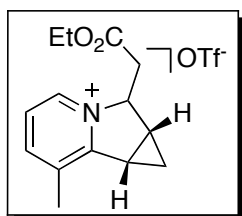

Product **5** was prepared from **S5** and ethyl acrylate using standard procedure **B** and was obtained in 43% yield as a green oil. This compound was isolated as a 2.4:1 mixture of inseparable diastereomers. The stereochemical assignment was determined by nOe as shown in Figure 1.  $^1\text{H}$  NMR ( $\text{CDCl}_3$ ) *major diastereomer*:  $\delta$  8.77 (d,  $J = 6.0$  Hz, 1H), 8.12 (d,  $J = 7.6$  Hz, 1H), 7.70 (app. t,  $J = 7.6$  Hz, 1H), 5.51 (m, 1H), 4.08 (q,  $J = 7.2$  Hz, 2H), 3.24 (dd,  $J = 17.0, 6.0$  Hz, 1H), 3.14 (dd,  $J = 17.0, 4.4$  Hz, 1H), 3.06 (m, 1H), 2.61 (s, 3H), 2.41 (app. q,  $J = 5.2$  Hz, 1H), 1.68 (app. q,  $J = 8.0$  Hz, 1H), 1.19 (t,  $J = 7.2$  Hz, 3H), 0.93 (m, 1H). *minor diastereomer*:  $\delta$  8.64 (d,  $J = 6.0$  Hz, 1H), 8.12 (d,  $J = 7.4$  Hz, 1H), 7.68 (app. t,  $J = 7.4$  Hz, 1H), 5.66 (m, 1H), 4.20 (dd,  $J = 7.0, 2.0$  Hz, 1H), 4.17 (dd,  $J = 7.0, 2.0$  Hz, 1H), 3.46 (m, 1H), 3.06 (m, 1H), 2.94 (dd,  $J = 16.8, 8.8$  Hz, 1H), 2.78 (m, 1H), 2.60 (s, 3H), 1.52 (app. q,  $J = 6.0$  Hz, 1H), 1.29 (t,  $J =$

7.2 Hz, 3H), 0.93 (m, 1H).  $^{13}\text{C}\{^1\text{H}\}$  NMR ( $\text{CDCl}_3$ ) *major diastereomer*:  $\delta$  169.02, 159.30, 145.91, 139.02, 134.80, 125.44, 120.78 (q,  $^1J_{\text{CF}} = 318$  Hz), 69.71, 61.58, 39.98, 23.06, 20.74, 18.21, 17.07, 14.13, *minor diastereomer*:  $\delta$  169.62, 159.30, 145.91, 138.74, 135.45, 125.63, 120.78 (q,  $^1J_{\text{CF}} = 318$  Hz), 68.07, 61.85, 37.44, 22.01, 20.59, 18.11, 14.20 13.56.  $^{19}\text{F}\{^1\text{H}\}$  NMR ( $\text{CDCl}_3$ ):  $\delta$  -78.50. IR (thin film): 1734  $\text{cm}^{-1}$ . HRMS electrospray (m/z):  $[\text{M}]^+$  calcd for  $\text{C}_{14}\text{H}_{18}\text{NO}_2^+$  232.1332; found 232.1332.

**Figure S1.** Observed nOes for **5**:

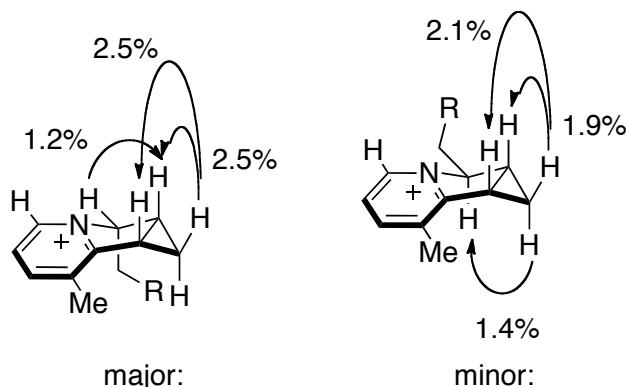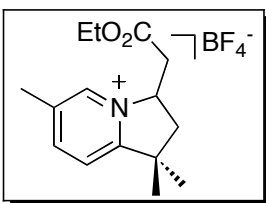

Product **6** was prepared from **S6** and ethyl acrylate using standard procedure **A** and was obtained in 70% yield as an orange oil.  $^1\text{H}$  NMR ( $\text{CDCl}_3$ ):  $\delta$  8.69 (s, 1H), 8.19 (d,  $J = 8.2$  Hz, 1H), 7.68 (d,  $J = 8.2$  Hz, 1H), 5.47 (m, 1H), 4.13 (q,  $J = 7.2$  Hz, 2H), 3.36 (dd,  $J = 18.1, 6.0$  Hz, 1H), 3.32 (dd,  $J = 18.1, 4.6$  Hz, 1H), 2.62 (dd,  $J = 13.2, 7.6$  Hz, 1H), 2.57 (s, 3H), 2.25 (dd,  $J = 13.2, 9.6$  Hz, 1H), 1.59 (s, 3H), 1.43 (s, 3H), 1.24 (t,  $J = 7.2$  Hz, 3H).  $^{13}\text{C}\{^1\text{H}\}$  NMR ( $\text{CDCl}_3$ ):  $\delta$  169.65, 162.61, 147.18, 139.31, 138.17, 121.87, 64.94, 61.60, 44.01, 42.45, 37.04, 28.47, 27.40, 18.40, 14.19.  $^{19}\text{F}\{^1\text{H}\}$  NMR ( $\text{CDCl}_3$ ):  $\delta$  -151.97, -152.03. IR (thin film): 1733  $\text{cm}^{-1}$ . HRMS electrospray (m/z):  $[\text{M}]^+$  calcd for  $\text{C}_{15}\text{H}_{22}\text{NO}_2^+$  248.1645; found 248.1646.

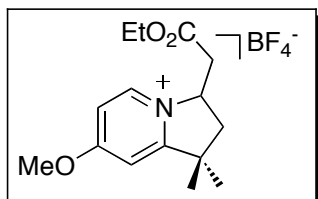

Product **7** was prepared from **S7** and ethyl acrylate using standard procedure **A** and was obtained in 71% yield as an orange oil.  $^1\text{H}$  NMR ( $\text{CDCl}_3$ ):  $\delta$  8.55 (d,  $J = 7.2$  Hz, 1H), 7.30 (dd,  $J = 7.2, 2.8$  Hz, 1H), 7.11 (d,  $J = 2.8$  Hz, 1H), 5.24

(m, 1H), 4.13 (q,  $J = 7.2$  Hz, 2H), 4.10 (s, 3H), 3.21 (dd,  $J = 17.6, 4.8$  Hz, 1H), 3.15 (dd,  $J = 17.6, 6.0$  Hz, 1H), 2.57 (dd,  $J = 13.2, 7.2$  Hz, 1H), 2.18 (dd,  $J = 13.2, 9.2$ , 1H), 1.55 (s, 3H), 1.41 (s, 3H), 1.23 (t,  $J = 7.2$  Hz, 3H).  $^{13}\text{C}\{^1\text{H}\}$  NMR ( $\text{CDCl}_3$ ):  $\delta$  172.51, 169.82, 167.32, 140.90, 113.06, 107.10, 63.06, 61.72, 58.16, 44.17, 43.07, 37.34, 28.32, 27.24, 14.19.  $^{19}\text{F}\{^1\text{H}\}$  NMR ( $\text{CDCl}_3$ ):  $\delta$  -152.48, -152.54. IR (thin film): 1733  $\text{cm}^{-1}$ . HRMS electrospray (m/z):  $[\text{M}]^+$  calcd for  $\text{C}_{15}\text{H}_{22}\text{NO}_3^+$  264.1594; found 264.1596.

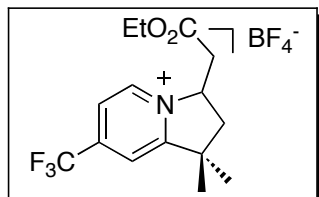

Product **8** was prepared from **S8** and ethyl acrylate using standard procedure **A** and was obtained in 75% yield as an orange oil.  $^1\text{H}$  NMR ( $\text{CDCl}_3$ ):  $\delta$  9.02 (d,  $J = 6.4$  Hz, 1H), 8.04 (d,  $J = 6.0$  Hz, 1H), 7.92 (s, 1H), 5.49 (m, 1H), 4.05 (q,  $J = 7.2$  Hz, 2H), 3.30 (dd,  $J = 17.8, 4.4$  Hz, 1H), 3.24 (dd,  $J = 17.8, 6.8$  Hz, 1H), 2.62 (dd,  $J = 13.2, 8.0$  Hz, 1H), 2.23 (dd,  $J = 13.2, 9.6$  Hz, 1H), 1.72 (s, 3H), 1.60 (s, 3H), 1.21 (t,  $J = 7.2$  Hz, 3H).  $^{13}\text{C}\{^1\text{H}\}$  NMR ( $\text{CDCl}_3$  with minimal  $\text{CD}_3\text{OD}$  added for solubility):  $\delta$  169.60, 167.69, 146.42 (q,  $^2J_{\text{CF}} = 36.1$  Hz), 142.55 (q,  $^3J_{\text{CF}} = 3.1$  Hz), 123.36, 121.13 (q,  $^1J_{\text{CF}} = 273.2$  Hz), 119.04 (q,  $^3J_{\text{CF}} = 3.4$  Hz), 66.26, 61.80, 44.99, 42.25, 36.53, 28.02, 27.00, 13.94.  $^{19}\text{F}\{^1\text{H}\}$  NMR ( $\text{CDCl}_3$ ):  $\delta$  -65.24, -152.68, -152.74. IR (thin film): 1733  $\text{cm}^{-1}$ . HRMS electrospray (m/z):  $[\text{M}]^+$  calcd for  $\text{C}_{15}\text{H}_{19}\text{F}_3\text{NO}_2^+$  302.1362; found 302.1362.

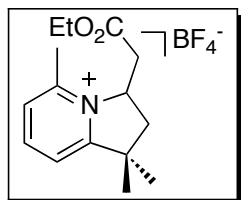

Product **9** was prepared from **S9** and ethyl acrylate using standard procedure **A** and was obtained in 36% yield as an orange oil.  $^1\text{H}$  NMR ( $\text{CDCl}_3$ ):  $\delta$  8.28 (dd,  $J = 8.0, 7.6$  Hz, 1H), 7.66-7.61 (multiple peaks, 2H), 5.59 (m, 1H), 4.18 (q,  $J = 7.2$  Hz, 2H), 3.08 (dd,  $J = 16.6, 2.4$  Hz, 1H), 2.94 (dd,  $J = 16.4, 9.6$  Hz, 1H), 2.85 (s, 3H), 2.77 (dd,  $J = 14.0, 9.6$  Hz, 1H), 2.19 (dd,  $J = 14.0, 2.4$  Hz, 1H), 1.56 (s, 3H), 1.52 (s, 3H), 1.27 (t,  $J = 7.2$  Hz, 3H).  $^{13}\text{C}\{^1\text{H}\}$  NMR ( $\text{CDCl}_3$ ):  $\delta$  168.98, 165.89, 152.74, 146.25, 128.52, 120.70, 64.47, 61.87, 44.80, 41.32, 39.28, 30.28, 29.49, 19.97, 14.23.  $^{19}\text{F}\{^1\text{H}\}$  NMR ( $\text{CDCl}_3$ ):  $\delta$  -153.22, -153.27. IR (thin film): 1733  $\text{cm}^{-1}$ . HRMS electrospray (m/z):  $[\text{M}]^+$  calcd for  $\text{C}_{15}\text{H}_{22}\text{NO}_2^+$  248.1645; found 248.1645.

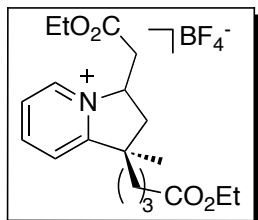

Product **10** was prepared from **S10** and ethyl acrylate using standard procedure **A** and was obtained in 49% yield as a 1:1 mixture of diastereomers as an orange oil. However, the assignment of specific NMR peaks to each diastereomer was not possible due to the number of overlapping resonances.  $^1\text{H}$  NMR ( $\text{CDCl}_3$ , 500 MHz):  $\delta$  8.83 (d,  $J = 4.8$  Hz, 1H), 8.80 (d,  $J = 4.8$  Hz, 1H), 8.40 (app t,  $J = 6.4$  Hz, 2H), 7.89 (m, 2H), 7.80 (d,  $J = 6.4$  Hz, 1H), 7.77 (d,  $J = 6.8$  Hz, 1H), 5.46-5.41 (multiple peaks, 2H), 4.11-4.04 (multiple peaks, 8H), 3.29-3.27 (multiple peaks, 4H), 2.75 (dd,  $J = 10.8, 6.4$  Hz, 1H), 2.49 (dd,  $J = 10.8, 6.4$  Hz, 1H), 2.33 (m, 2H), 2.26 (t,  $J = 5.6$  Hz, 2H), 2.15 (dd,  $J = 11.0, 7.4$  Hz, 1H), 1.95-1.82 (multiple peaks, 2H), 1.76-1.38 (multiple peaks, 13H), 1.23-1.18 (multiple peaks, 12H).  $^{13}\text{C}\{^1\text{H}\}$  NMR ( $\text{CDCl}_3$ , 125 MHz):  $\delta$  173.16, 173.08, 169.72 (2C), 169.53, 164.62, 146.13, 145.96, 140.66 (2C), 126.98, 126.86, 123.01, 122.71, 65.42, 65.08, 61.77, 60.77, 47.96, 47.91, 40.03, 40.01, 39.33, 38.34, 37.20, 36.50, 33.77, 33.59, 26.28, 25.21, 23.19, 19.89, 19.72, 14.43, 14.40, 14.21.  $^{19}\text{F}\{^1\text{H}\}$  NMR ( $\text{CDCl}_3$ ):  $\delta$  -151.92, -151.97. IR (thin film): 1727  $\text{cm}^{-1}$ . HRMS electrospray ( $m/z$ ):  $[\text{M}]^+$  calcd for  $\text{C}_{19}\text{H}_{28}\text{NO}_4^+$  334.2013; found 334.2008.

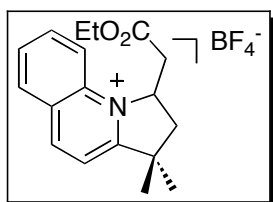

Product **11** was prepared from **S11** and ethyl acrylate using standard procedure **A** and was obtained in 39% yield as a yellow oil.  $^1\text{H}$  NMR ( $\text{CDCl}_3$ ):  $\delta$  8.99 (d,  $J = 8.4$  Hz, 1H), 8.26 (d,  $J = 8.0$  Hz, 1H), 8.22-8.14 (multiple peaks, 2H), 7.92-7.88 (multiple peaks, 2H), 6.13 (m, 1H), 4.17-4.07 (multiple peaks, 2H), 3.28 (dd,  $J = 16.8, 2.4$  Hz, 1H), 3.07 (dd,  $J = 16.4, 9.6$  Hz, 1H), 2.96 (dd,  $J = 13.6, 9.6$  Hz, 1H), 2.37 (dd,  $J = 13.6, 2.0$  Hz, 1H), 1.69 (s, 3H), 1.65 (s, 3H), 1.27 (t,  $J = 6.8$  Hz, 3H).  $^{13}\text{C}\{^1\text{H}\}$  NMR ( $\text{CDCl}_3$ ):  $\delta$  169.24 (2C), 148.92, 136.05, 135.88, 131.12, 129.94, 129.46, 118.76, 117.96, 63.93, 61.99, 46.62, 41.34, 39.47, 29.57 (2C), 14.26.  $^{19}\text{F}\{^1\text{H}\}$  NMR ( $\text{CDCl}_3$ ):  $\delta$  -153.22, -153.27. IR (thin film): 1733  $\text{cm}^{-1}$ . HRMS electrospray ( $m/z$ ):  $[\text{M}]^+$  calcd for  $\text{C}_{18}\text{H}_{22}\text{NO}_2^+$  284.1645; found 284.1645.

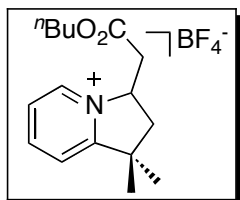

Product **P1** was prepared from **S1** and *n*-butyl acrylate using standard procedure **A** and was obtained in 80% yield as an orange oil.  $^1\text{H}$  NMR ( $\text{CDCl}_3$ ):  $\delta$  8.84 (d,  $J = 6.2$  Hz, 1H), 8.43 (dd,  $J = 8.0, 7.6$  Hz, 1H), 7.91 (dd,  $J = 7.2, 6.2$  Hz, 1H), 7.81 (d,



8.0 Hz, 1H), 5.50 (m, 1H), 4.07 (app. t,  $J = 10.8$  Hz, 2H), 3.33 (app. d,  $J = 4.8$  Hz, 2H), 2.64 (dd,  $J = 13.2, 7.6$  Hz, 1H), 2.27 (dd,  $J = 13.2, 9.4$  Hz, 1H), 1.61-1.55 (multiple peaks, 5H), 1.46 (s, 3H), 1.38-1.31 (multiple peaks, 2H), 0.92 (t,  $J = 6.8$  Hz, 3H).  $^{13}\text{C}\{^1\text{H}\}$  NMR ( $\text{CDCl}_3$ ):  $\delta$  169.61, 165.41, 146.63, 139.94, 126.74, 122.84, 65.47, 65.09, 44.39, 42.34, 37.12, 30.52, 28.27, 27.30, 19.13, 13.78.  $^{19}\text{F}\{^1\text{H}\}$  NMR ( $\text{CDCl}_3$ ):  $\delta$  -152.51, -152.57. IR (thin film):  $1731\text{ cm}^{-1}$ . HRMS electrospray ( $m/z$ ):  $[\text{M}]^+$  calcd for  $\text{C}_{16}\text{H}_{24}\text{NO}_2^+$  262.1802; found 262.1802.

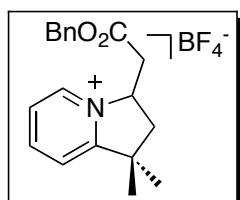

Product **P2** was prepared from **S1** and benzyl acrylate using standard procedure **A** and was obtained in 75% yield as a yellow oil.  $^1\text{H}$  NMR ( $\text{CDCl}_3$ ):  $\delta$  8.77 (d,  $J = 6.4$  Hz, 1H), 8.28 (dd,  $J = 8.0, 7.6$  Hz, 1H), 7.79 (app. t,  $J = 6.4$  Hz, 1H), 7.65 (d, 8.0 Hz, 1H), 7.31-7.22 (multiple peaks, 5H), 5.46 (m, 1H), 5.05 (s, 2H), 3.35 (dd,  $J = 15.8, 3.4$  Hz, 1H), 3.32 (dd,  $J = 15.8, 2.6$  Hz, 1H), 2.54 (dd,  $J = 13.2, 7.6$  Hz, 1H), 2.19 (dd,  $J = 13.2, 9.6$  Hz, 1H), 1.49 (s, 3H), 1.38 (s, 3H).  $^{13}\text{C}\{^1\text{H}\}$  NMR ( $\text{CDCl}_3$ ):  $\delta$  169.42, 165.34, 146.26, 140.35, 135.19, 128.89, 128.83, 128.81, 126.74, 122.37, 67.48, 65.12, 44.39, 42.29, 36.96, 28.42, 27.24.  $^{19}\text{F}\{^1\text{H}\}$  NMR ( $\text{CDCl}_3$ ):  $\delta$  -152.00, -152.05. IR (thin film):  $1735\text{ cm}^{-1}$ . HRMS electrospray ( $m/z$ ):  $[\text{M}]^+$  calcd for  $\text{C}_{19}\text{H}_{22}\text{NO}_2^+$  296.1645; found 296.1646.

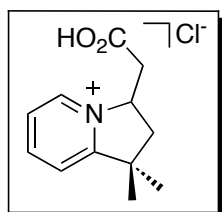

Product **P3** was prepared from **S1** and acrylic acid (Aldrich) using standard procedure **A**. After removal of the acetic acid and methanol, NMR analysis of crude mixture shows 69% yield; however, the carboxylic acid product was inseparable from acrylic acid oligomers. A pure sample of **P3** for characterization was obtained as the chloride salt through hydrolysis of **1**.  $^1\text{H}$  NMR ( $\text{CD}_3\text{OD}$ ) for **P3**:  $\delta$  8.84 (d,  $J = 6.0$  Hz, 1H), 8.44 (app. t,  $J = 7.6$  Hz, 1H), 7.99 (d,  $J = 8.0$  Hz, 1H), 7.87 (app. t,  $J = 6.4$  Hz, 1H), 5.37 (m, 1H), 3.27 (dd,  $J = 18.6, 4.8$  Hz, 1H), 3.14 (dd,  $J = 17.6, 6.8$  Hz, 1H), 2.60 (dd,  $J = 14.2, 5.6$  Hz, 1H), 2.19 (dd,  $J = 13.2, 8.8$  Hz, 1H), 1.53 (s, 3H), 1.39 (s, 3H).  $^{13}\text{C}\{^1\text{H}\}$  NMR ( $\text{CD}_3\text{OD}$ ):  $\delta$  171.09, 165.76, 146.29, 139.69, 126.16, 122.82, 65.28, 43.99, 42.14, 36.98, 27.01, 26.22. IR (thin film):  $2971, 1732\text{ cm}^{-1}$ . HRMS electrospray ( $m/z$ ):  $[\text{M}]^+$  calcd for  $\text{C}_{12}\text{H}_{16}\text{NO}_2^+$  206.1176; found 206.1172.

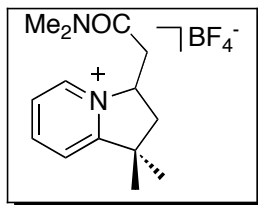

Product **P4** was prepared from **S1** and N,N-dimethyl acrylamide (Aldrich) using standard procedure **A**. After removal of the acetic acid and methanol, NMR analysis of crude mixture shows 55% yield. Water was added and the solution was washed with (5 x 2 mL) of CH<sub>2</sub>Cl<sub>2</sub> to remove the acrylamide oligomers, polyoxometalate and catalyst. The water was removed under reduced pressure and 1 mL of saturated NaBF<sub>4</sub> solution was added. The product was extracted with (5 x 1 mL) CH<sub>2</sub>Cl<sub>2</sub> as a BF<sub>4</sub><sup>-</sup> salt. The CH<sub>2</sub>Cl<sub>2</sub> layers were combined, dried with MgSO<sub>4</sub>, filtered and evaporated to afford the product in 40% yield as a yellow oil. <sup>1</sup>H NMR (CDCl<sub>3</sub>): δ 8.80 (d, *J* = 6.0 Hz, 1H), 8.38 (app. t, *J* = 7.6 Hz, 1H), 7.82-7.78 (multiple peaks, 2H), 5.47 (m, 1H), 3.42 (dd, *J* = 17.6, 5.2 Hz, 1H), 3.23 (dd, *J* = 17.6, 5.2 Hz, 1H), 3.04 (s, 3H), 2.91 (s, 3H), 2.57 (dd, *J* = 13.0, 7.6 Hz, 1H), 2.36 (dd, *J* = 13.0, 10.0 Hz, 1H), 1.59 (s, 3H), 1.41 (s, 3H). <sup>13</sup>C{<sup>1</sup>H} NMR (CDCl<sub>3</sub>): δ 168.66, 165.51, 146.12, 140.22, 126.55, 122.47, 65.78, 44.23, 42.80, 37.28, 36.68, 35.65, 28.33, 27.03. <sup>19</sup>F{<sup>1</sup>H} NMR (CDCl<sub>3</sub>): δ -152.07, -152.13. IR (thin film): 1652 cm<sup>-1</sup>. HRMS electrospray (*m/z*): [M]<sup>+</sup> calcd for C<sub>14</sub>H<sub>21</sub>N<sub>2</sub>O<sup>+</sup> 233.1648; found 233.1648.

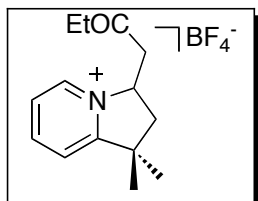

Product **P5** was prepared from **S1** and ethyl vinyl ketone (Aldrich, freshly distilled prior to use) using standard procedure **A** and was obtained in 40% yield as a yellow solid. Mp = 102-105 °C. <sup>1</sup>H NMR (CDCl<sub>3</sub>): δ 8.74 (d, *J* = 6.4 Hz, 1H), 8.41 (app. t, *J* = 7.2 Hz, 1H), 7.85 (app t., *J* = 7.6 Hz, 1H), 7.82 (d, *J* = 8.0 Hz, 1H), 5.39 (m, 1H), 3.60 (dd, *J* = 19.2, 4.8 Hz, 1H), 3.38 (dd, *J* = 18.8, 6.4 Hz, 1H), 2.64 (dd, *J* = 13.2, 7.6 Hz, 1H), 2.56 (m, 2H), 2.19 (dd, *J* = 13.2, 9.6 Hz, 1H), 1.59 (s, 3H), 1.43 (s, 3H), 1.02 (t, *J* = 7.2 Hz, 3H). <sup>13</sup>C{<sup>1</sup>H} NMR (CDCl<sub>3</sub>): δ 208.34, 165.39, 146.30, 140.09, 126.82, 122.59, 64.90, 44.89, 44.46, 42.80, 36.21, 28.30, 27.34, 7.55. <sup>19</sup>F{<sup>1</sup>H} NMR (CDCl<sub>3</sub>): δ -152.12, -152.17. IR (thin film): 1714 cm<sup>-1</sup>. HRMS electrospray (*m/z*): [M]<sup>+</sup> calcd for C<sub>14</sub>H<sub>20</sub>NO<sup>+</sup> 218.1539; found 218.1537.

## V. Reductions of Pyridinium Salts

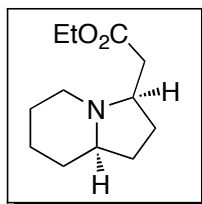

To a 25 mL flask were added **2** (147 mg, 0.50 mmol), PtO<sub>2</sub> (11 mg, 0.048 mmol, 10 mol %, Aldrich), and ethanol (5 mL). Hydrogen was bubbled through the resulting suspension for 5 min, and then the mixture was stirred at room temperature for 14 h under a balloon of hydrogen. The resulting suspension was filtered through a plug of glass wool, and the solvent was removed under vacuum. The crude product was dissolved in CH<sub>2</sub>Cl<sub>2</sub> (30 mL) and washed with 1 M aqueous NaOH (1 x 20 mL). The aqueous layer was extracted with CH<sub>2</sub>Cl<sub>2</sub> (2 x 30 mL), and the CH<sub>2</sub>Cl<sub>2</sub> extracts were combined, dried over Na<sub>2</sub>SO<sub>4</sub>, and concentrated under vacuum. <sup>1</sup>H NMR spectroscopic analysis of the crude product showed a 28:1 ratio of two diastereomeric products. The crude product was purified by chromatography on basic alumina by gradient elution starting with 95:5 and ending with 90:10 hexanes/ethyl acetate to provide diastereomerically pure **12** as a colorless oil (79 mg, 75% yield, R<sub>f</sub> = 0.31 in 90:10 hexanes/ethyl acetate on an alumina TLC plate). The stereochemistry of **12** was determined by nOe analysis (Figure 2). <sup>1</sup>H NMR (CDCl<sub>3</sub>): δ 4.13 (q, *J* = 7.2 Hz, 2H), 3.05 (m, 1H), 2.68 (dd, *J* = 14.8, 4.0 Hz, 1H), 2.53 (dtd, *J* = 9.2, 7.8, 4.0 Hz, 1H), 2.26 (dd, *J* = 14.8, 9.2 Hz, 1H), 1.99-1.86 (multiple peaks, 2H), 1.86 (ddd, *J* = 12.4, 10.8, 3.2 Hz, 1H), 1.80-1.71 (multiple peaks, 3H), 1.65 (m, 1H), 1.53-1.41 (multiple peaks, 2H), 1.35 (qd, *J* = 11.2, 6.8 Hz, 1H), 1.25 (t, *J* = 7.2 Hz, 3H), 1.23-1.15 (multiple peaks, 2H). <sup>13</sup>C{<sup>1</sup>H} NMR (CDCl<sub>3</sub>): δ 172.66, 65.31, 61.51, 60.40, 51.46, 39.18, 31.39, 29.24, 28.81, 25.62, 24.46, 14.42. IR (thin film): 1736 cm<sup>-1</sup>. HRMS electrospray (*m/z*): [M+H]<sup>+</sup> calcd for C<sub>12</sub>H<sub>22</sub>NO<sub>2</sub><sup>+</sup> 212.1645; found 212.1647.

**Figure S2.** Observed nOes for **12**:

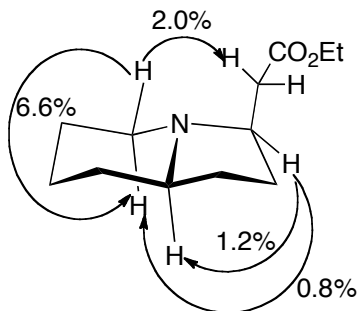

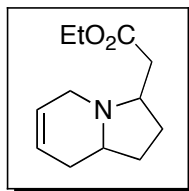

To a 25 mL flask were added **2** (147 mg, 0.50 mmol) and ethanol (5 mL). The solution was cooled to 0 °C in an ice bath and NaBH<sub>4</sub> (49 mg, 1.3 mmol, 2.6 equiv, Aldrich) was added slowly over 5 min. The reaction mixture was stirred at 0 °C for 6 h, warmed to room temperature, and stirred for an additional 4 h. Water (1 mL) was added, and the reaction was concentrated to ~2 mL. The resulting white slurry was partitioned between CH<sub>2</sub>Cl<sub>2</sub> (15 mL) and water (15 mL), and the pH of the aqueous layer was adjusted to ~10 by addition of K<sub>2</sub>CO<sub>3</sub>. The layers were separated, and the aqueous layer was extracted with CH<sub>2</sub>Cl<sub>2</sub> (2 x 15 mL). The CH<sub>2</sub>Cl<sub>2</sub> extracts were combined, dried with Na<sub>2</sub>SO<sub>4</sub>, and concentrated under vacuum to give a colorless oil. <sup>1</sup>H NMR analysis of the crude product showed a 2.3:1 ratio of two diastereomeric products. The crude products were purified by chromatography on basic alumina by gradient elution starting with 98:2 and ending with 90:10 hexanes/ethyl acetate to provide the products **13A** and **13B**.

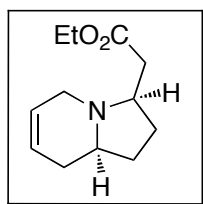

Product **13A** was isolated as a colorless oil (60 mg, 57% yield, R<sub>f</sub> = 0.33 in 95:5 CH<sub>2</sub>Cl<sub>2</sub>/MeOH on a silica gel TLC plate). <sup>1</sup>H NMR (CDCl<sub>3</sub>): δ 5.75 (m, 1H), 5.71 (m, 1H), 4.14 (q, *J* = 7.2 Hz, 2H), 3.44 (ddd, *J* = 16.0, 4.0, 2.4 Hz, 1H), 2.73 (m, 1H), 2.72 (dd, *J* = 14.4, 4.8 Hz, 1H), 2.67 (dddd, *J* = 12.4, 8.8, 8.0, 4.4 Hz, 1H), 2.32 (dd, *J* = 14.4, 8.8 Hz, 1H), 2.36-2.21 (multiple peaks, 2H), 2.08-1.90 (multiple peaks, 3H), 1.53 (dddd, *J* = 12.4, 10.8, 6.4, 4.8 Hz, 1H), 1.42 (dddd, *J* = 12.4, 10.8, 8.4, 6.4 Hz, 1H), 1.26 (t, *J* = 7.2 Hz, 3H). <sup>13</sup>C{<sup>1</sup>H} NMR (CDCl<sub>3</sub>): δ 172.54, 125.57, 125.29, 62.32, 60.53, 60.50, 51.50, 39.55, 33.07, 29.64, 29.05, 14.45. IR (thin film): 3033, 1734, 1656 cm<sup>-1</sup>. HRMS electrospray (m/z): [M+H]<sup>+</sup> calcd for C<sub>12</sub>H<sub>20</sub>NO<sub>2</sub><sup>+</sup> 210.1489; found 210.1487.

The stereochemistry of **13A** was confirmed by hydrogenation to form **12** in the following manner: To a 25 mL flask were added **13A** (21 mg, 0.10 mmol), PtO<sub>2</sub> (2 mg, 0.009 mmol, 9 mol %), and ethanol (1 mL). Hydrogen was bubbled through the resulting suspension, and then the mixture was stirred at room temperature for 14 h under a balloon of hydrogen. The suspension was filtered through a plug of glass wool, and the solvent was removed under vacuum. The <sup>1</sup>H NMR spectrum of the crude product matched that of **12**.

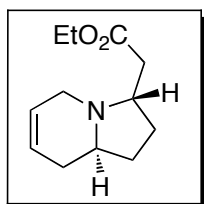

Product **13B** was isolated as a colorless oil (25 mg, 24% yield,  $R_f = 0.32$  in 90:10  $\text{CH}_2\text{Cl}_2/\text{MeOH}$  on a silica gel TLC plate). The stereochemistry of **13B** was determined by nOe analysis (Figure 3).  $^1\text{H}$  NMR ( $\text{C}_6\text{D}_6$ ):  $\delta$  5.65 (dddd,  $J = 10.0, 4.0, 2.8, 2.4, 2.0$  Hz, 1H), 5.55 (ddq,  $J = 10.0, 4.0, 2.0$  Hz, 1H), 3.97 (q,  $J = 7.2$  Hz, 2H), 3.70 (dddd,  $J = 9.2, 8.0, 4.8, 3.2$  Hz, 1H), 3.16 (dddt,  $J = 16.8, 4.0, 3.6, 2.0$  Hz, 1H), 3.08 (ddq,  $J = 16.8, 4.0, 2.0$  Hz, 1H), 2.68 (ddt,  $J = 8.8, 6.8, 5.6$  Hz, 1H), 2.46 (dd,  $J = 14.4, 4.8$  Hz, 1H), 2.04 (dd,  $J = 14.4, 9.2$  Hz, 1H), 2.03 (dddd,  $J = 12.8, 10.4, 8.0, 6.8$  Hz, 1H), 1.87-1.82 (multiple peaks, 2H), 1.78 (ddt,  $J = 12.4, 10.0, 6.8$  Hz, 1H), 1.56 (dddd,  $J = 12.8, 10.0, 4.4, 3.2$  Hz, 1H), 1.24 (dddd,  $J = 12.4, 10.4, 5.6, 4.4$  Hz, 1H), 0.97 (t,  $J = 7.2$  Hz, 3H).  $^{13}\text{C}\{^1\text{H}\}$  NMR ( $\text{CDCl}_3$ ):  $\delta$  173.05, 125.44, 125.21, 60.59, 57.75, 54.84, 46.19, 35.53, 31.75, 29.84, 28.56, 14.45. IR (thin film): 3030, 1733, 1659  $\text{cm}^{-1}$ . HRMS electrospray ( $m/z$ ):  $[\text{M}+\text{H}]^+$  calcd for  $\text{C}_{12}\text{H}_{20}\text{NO}_2^+$  210.1489; found 210.1488.

**Figure S3.** Observed nOes for **13B**:

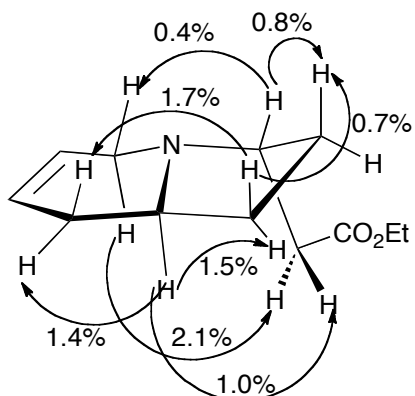

## VI. Formation of the Linear Heck Products

### Standard procedure for Formation of the Linear Heck Product

To a 25 mL flask charged with the appropriate pyridinium salt (0.50 mmol, 1.0 equiv) under nitrogen was added 10 mL of dry CH<sub>2</sub>Cl<sub>2</sub> followed by 1,8-diazabicyclo[5.4.0]undec-7-ene (150 μL, 1.0 mmol, 2.0 equiv, Aldrich). The reaction was stirred for 1h at room temperature, after which the solution was diluted with CH<sub>2</sub>Cl<sub>2</sub> (30 mL). The CH<sub>2</sub>Cl<sub>2</sub> solution was washed with saturated aqueous NaHCO<sub>3</sub> (2 x 20 mL), and the combined aqueous layers were extracted once with CH<sub>2</sub>Cl<sub>2</sub> (20 mL). The CH<sub>2</sub>Cl<sub>2</sub> layers were combined, washed with 20 mL of brine, dried over Na<sub>2</sub>SO<sub>4</sub>, concentrated under vacuum, and chromatographed as indicated below.

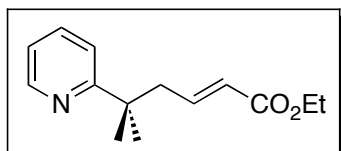

Product **14** was made from pyridinium salt **1** and was purified by chromatography on basic alumina, which had been flushed with 99:1 hexanes/triethylamine, eluting with 69:30:1 hexanes/ethyl acetate/triethylamine to provide the product **14** as a colorless oil (96 mg, 82% yield,  $R_f = 0.39$  in 78:20:2 hexanes/ethyl acetate/triethylamine on an alumina TLC plate to which 98:2 hexanes/triethylamine had been applied and allowed to evaporate prior to spotting with the sample). <sup>1</sup>H NMR (CDCl<sub>3</sub>): δ 8.57 (ddd,  $J = 4.8, 2.0, 0.8$  Hz, 1H), 7.61 (ddd,  $J = 8.0, 7.6, 2.0$  Hz, 1H), 7.27 (d,  $J = 8.0$  Hz, 1H), 7.10 (ddd,  $J = 7.6, 4.8, 0.8$  Hz, 1H), 6.74 (dt,  $J = 15.6, 7.6$  Hz, 1H), 5.77 (dt,  $J = 15.6, 1.2$  Hz, 1H), 4.13 (q,  $J = 7.2$  Hz, 2H), 2.65 (dd,  $J = 7.6$  Hz, 1.2 Hz, 2H), 1.36 (s, 6H), 1.24 (t,  $J = 7.2$  Hz, 3H). <sup>13</sup>C{<sup>1</sup>H} NMR (CDCl<sub>3</sub>): δ 167.06, 166.66, 149.07, 146.52, 136.50, 123.69, 121.23, 119.88, 60.31, 45.72, 40.93, 27.96, 14.45. IR (thin film): 3052, 1718, 1652 cm<sup>-1</sup>. HRMS electrospray (m/z): [M+H]<sup>+</sup> calcd for C<sub>14</sub>H<sub>20</sub>NO<sub>2</sub><sup>+</sup> 234.1489; found 234.1486.

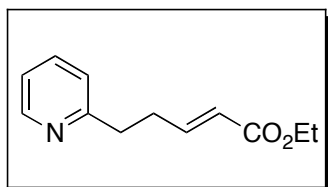

Product **15** was made from pyridinium salt **2** and was purified by chromatography on basic alumina eluting with 70:30 hexanes/ethyl acetate to provide the product **15** as a colorless oil (98 mg, 95% yield,  $R_f = 0.28$  in 80:20 hexanes/ethyl acetate on an alumina TLC plate). <sup>1</sup>H NMR (CDCl<sub>3</sub>): δ 8.53 (ddd,  $J = 4.8, 1.6, 1.2$  Hz, 1H), 7.59 (ddd,  $J = 8.0, 7.6, 2.0$  Hz, 1H), 7.13 (d,  $J = 8.0$  Hz, 1H), 7.12 (ddd,  $J = 7.6, 4.8, 1.2$  Hz, 1H), 7.00 (dt,  $J = 15.6, 6.8$  Hz, 1H), 5.84 (dt,  $J = 15.6, 1.6$  Hz, 1H), 4.16 (q,  $J = 7.2$  Hz, 2H), 2.94 (dd,  $J = 8.0, 7.2$  Hz, 2H), 2.66 (dddd, 8.0, 7.2, 6.8, 1.6 Hz, 2H), 1.27 (t,  $J = 7.2$  Hz, 3H). <sup>13</sup>C{<sup>1</sup>H} NMR (CDCl<sub>3</sub>): δ 166.78, 160.53, 149.64, 148.09, 136.62, 123.06, 122.12, 121.56, 60.40, 36.74, 32.12, 14.45. IR (thin film): 3064, 1718,

1654  $\text{cm}^{-1}$ . HRMS electrospray (m/z):  $[\text{M}+\text{H}]^+$  calcd for  $\text{C}_{12}\text{H}_{16}\text{NO}_2^+$  206.1176; found 206.1174.

## VII. Derivatizations of the Linear Heck Product

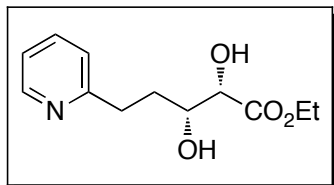

To a 20 mL vial was added AD-mix  $\beta$  (700 mg, Aldrich), methanesulfonamide (95 mg, 1.00 mmol, 2.0 equiv, Aldrich), *t*-BuOH (1 mL), and water (1 mL). The mixture was stirred and cooled to 0 °C in an ice bath. **15** (103 mg, 0.50 mmol) was added, and the mixture was stirred at 0 °C for 24 h. A 10% aqueous solution of Na<sub>2</sub>SO<sub>3</sub> (5 mL) was added with stirring followed by the addition of another 5 mL of water. The mixture was extracted with CH<sub>2</sub>Cl<sub>2</sub> (8 x 10 mL), and the CH<sub>2</sub>Cl<sub>2</sub> extracts were combined and concentrated under vacuum. The crude product was purified by chromatography on silica gel, eluting with 95:5 CH<sub>2</sub>Cl<sub>2</sub>/MeOH to provide the product **16** as a colorless oil (110 mg, 92% yield, 97% ee as determined by Mosher ester analysis, R<sub>f</sub> = 0.19 in 95:5 CH<sub>2</sub>Cl<sub>2</sub>/MeOH). The absolute stereochemistry of the diol was assumed based on the mnemonic rule for the facial selectivity of the Sharpless dihydroxylation reaction.<sup>9</sup> <sup>1</sup>H NMR (CDCl<sub>3</sub>):  $\delta$  8.46 (d, *J* = 5.4 Hz, 1H), 7.63 (td, *J* = 7.6, 2.0 Hz, 1H), 7.20 (d, *J* = 7.6 Hz, 1H), 7.14 (dd, *J* = 7.6, 5.4 Hz, 1H), 5.98 (br s, 1H), 4.30 (dq, *J* = 10.4, 7.2 Hz, 1H), 4.28 (dq, *J* = 10.4, 7.2 Hz, 1H), 4.11-4.04 (multiple peaks, 2H), 3.29 (br d, *J* = 5.6 Hz, 1H), 3.10 (ddd, *J* = 15.2, 7.6, 4.8 Hz, 1H), 3.06 (ddd, *J* = 15.2, 7.2, 5.2 Hz, 1H), 2.15 (m, 1H), 2.06 (m, 1H), 1.32 (t, *J* = 7.2 Hz, 3H). <sup>13</sup>C{<sup>1</sup>H} NMR (CDCl<sub>3</sub>):  $\delta$  173.61, 161.24, 148.54, 137.24, 123.53, 121.52, 74.19, 72.80, 61.84, 34.76, 32.46, 14.36. IR (thin film): 3368, 1734 cm<sup>-1</sup>. HRMS electrospray (*m/z*): [M+H]<sup>+</sup> calcd for C<sub>12</sub>H<sub>18</sub>NO<sub>4</sub><sup>+</sup> 240.1230; found 240.1228. [ $\alpha$ ]<sub>D</sub><sup>25</sup> = -11.8 (*c* = 2.00, CHCl<sub>3</sub>).

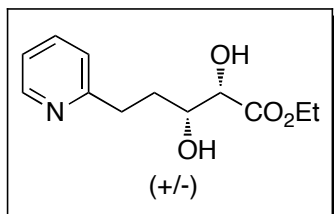

To a solution of **15** (103 mg, 0.50 mmol) in 9:1 acetone/water (4 mL) in a 20 mL vial was added 4-methylmorpholine *N*-oxide (117 mg, 1.00 mmol, 2.0 equiv, Aldrich) and aqueous 4% OsO<sub>4</sub> (32  $\mu$ L, 0.0050 mmol, 1.0 mol %, Aldrich). The mixture was stirred at room temperature for 12 h. A 10% aqueous solution of Na<sub>2</sub>SO<sub>3</sub> (5 mL) was added with stirring followed by the addition of another 5 mL of water. The mixture was extracted with CH<sub>2</sub>Cl<sub>2</sub> (8 x 10 mL), and the CH<sub>2</sub>Cl<sub>2</sub> extracts were combined and concentrated under vacuum. The crude product was purified by chromatography on silica gel, eluting with 95:5 CH<sub>2</sub>Cl<sub>2</sub>/MeOH to provide the racemic product **rac-16** as a colorless oil (105 mg, 88% yield). The spectroscopic data matched that of the diol **16** made by Sharpless asymmetric dihydroxylation.



## Mosher analysis<sup>10</sup> of **16**:

The (*R*)-Mosher diester of **16** was prepared from **16** and (*R*)-(+)- $\alpha$ -methoxy- $\alpha$ -trifluoromethylphenylacetic acid ((*R*)-(+)-MTPA) as follows: To a 25 mL flask was added **rac-16** (24 mg, 0.10 mmol). Toluene (5 mL) was added and evaporated under high vacuum to remove water as an azeotrope. (*R*)-MTPA, (70 mg, 0.30 mmol, 3.0 equiv, Matrix Scientific) and dry CH<sub>2</sub>Cl<sub>2</sub> (1 mL) were added under nitrogen. 1-Ethyl-3-(3-dimethylaminopropyl) carbodiimide hydrochloride (58 mg, 0.30 mmol, 3.0 equiv, TCI America), 4-(dimethylamino)pyridine (3.0 mg, 0.025 mmol, 0.25 equiv, Aldrich), and *N*-ethyl-diisopropylamine (85  $\mu$ L, 0.50 mmol, 5.0 equiv, Alfa Aesar) were added sequentially. The reaction mixture was stirred at room temperature for 24 h, diluted with 10 mL of CH<sub>2</sub>Cl<sub>2</sub>, and then this CH<sub>2</sub>Cl<sub>2</sub> solution was washed with saturated aqueous NH<sub>4</sub>Cl (10 mL), water (10 mL), saturated aqueous NaHCO<sub>3</sub> (10 mL), and brine (10 mL). The CH<sub>2</sub>Cl<sub>2</sub> solution was dried over Na<sub>2</sub>SO<sub>4</sub>, and the solvent was evaporated under vacuum. The crude product was purified by chromatography on silica gel, eluting with 98:2 CH<sub>2</sub>Cl<sub>2</sub>/MeOH, and collecting all of the fractions that contained the Mosher ester products according to TLC. The fractions were concentrated to provide the product mixture (**bis-(*R*)-MTPA esters of *rac-16***) as a colorless oil (63 mg, 94% yield, R<sub>f</sub> = 0.29 in 98:2 CH<sub>2</sub>Cl<sub>2</sub>/MeOH).

The Mosher esterification reaction above was performed on diol **16** made by Sharpless asymmetric dihydroxylation to provide predominantly the **bis-(*R*)-MTPA ester of (2*S*, 3*R*)-16**. Integration of the doublets at 5.41 ppm and 5.49 ppm in the <sup>1</sup>H NMR spectrum of the product mixture indicated that the ee of **16** was 97% (Figure 4).

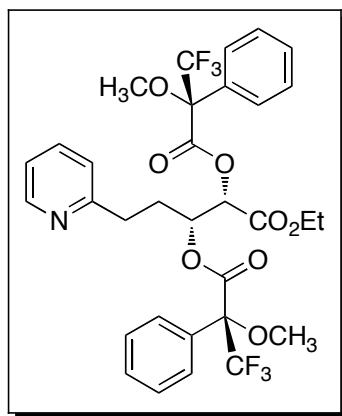

**Bis-(*R*)-MTPA ester of (2*S*, 3*R*)-16:** <sup>1</sup>H NMR (500 MHz, CDCl<sub>3</sub>):  $\delta$  8.51 (br d,  $J$  = 5.0 Hz, 1H), 7.58 (br d,  $J$  = 7.5 Hz, 2H), 7.57 (td,  $J$  = 7.5, 1.5 Hz, 1H), 7.51 (br d,  $J$  = 7.5 Hz, 2H), 7.41-7.31 (multiple peaks, 6H), 7.12 (dd,  $J$  = 7.5, 5.0 Hz, 1H), 6.94 (d,  $J$  = 7.5 Hz, 1H), 5.68 (td,  $J$  = 7.0, 2.0 Hz, 1H), 5.41 (d,  $J$  = 2.0 Hz, 1H), 4.18 (dq,  $J$  = 11.0, 7.0 Hz, 1H), 4.16 (dq,  $J$  = 11.0, 7.0 Hz, 1H), 3.48 (s, 3H), 3.38 (s, 3H), 2.65 (dt,  $J$  = 14.0, 7.5 Hz, 1H), 2.62 (dt,  $J$  = 14.0, 7.5 Hz, 1H), 2.16 (q,  $J$  = 7.0 Hz, 2H), 1.23 (t,  $J$  = 7.0 Hz, 3H). <sup>13</sup>C{<sup>1</sup>H} NMR (CDCl<sub>3</sub>):  $\delta$  166.42, 166.34, 166.13, 159.55, 149.68, 136.73, 132.02, 131.38, 129.98, 129.87, 128.60, 128.58, 128.06,

127.55, 123.33 (q,  $^1J_{CF} = 288.5$  Hz), 123.27 (q,  $^1J_{CF} = 288.5$  Hz), 123.07, 121.76, 85.14 (q,  $^2J_{CF} = 28.0$  Hz), 84.70 (q,  $^2J_{CF} = 27.7$  Hz), 74.24, 73.98, 62.76, 55.73 (2C), 33.33, 30.33, 14.04.  $^{19}\text{F}\{^1\text{H}\}$  NMR ( $\text{CDCl}_3$ ):  $\delta$  -71.64, -72.21. IR (thin film): 1754  $\text{cm}^{-1}$ . HRMS electrospray (m/z):  $[\text{M}+\text{H}]^+$  calcd for  $\text{C}_{32}\text{H}_{32}\text{F}_6\text{NO}_8^+$  672.2027; found 672.2020.

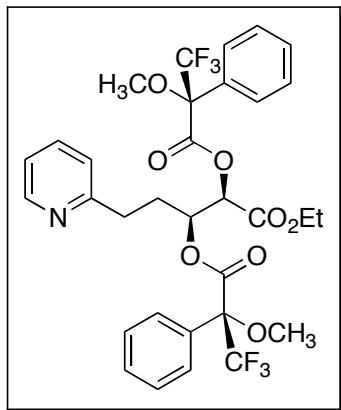

**Bis-(*R*)-MTPA ester of (2*R*, 3*S*)-16:**  $^1\text{H}$  NMR (500 MHz,  $\text{CDCl}_3$ ):  $\delta$  8.52 (br d,  $J = 5.0$  Hz, 1H), 7.66 (br d,  $J = 7.5$  Hz, 2H), 7.58 (td,  $J = 7.5, 1.5$  Hz, 1H), 7.51 (br d,  $J = 7.5$  Hz, 2H), 7.41-7.31 (multiple peaks, 6H), 7.13 (dd,  $J = 7.5, 5.0$  Hz, 1H), 6.98 (d,  $J = 7.5$  Hz, 1H), 5.64 (td,  $J = 7.0, 2.0$  Hz, 1H), 5.49 (d,  $J = 2.0$  Hz, 1H), 4.08 (q,  $J = 7.0$  Hz, 2H), 3.60 (s, 3H), 3.42 (s, 3H), 2.72 (ddd,  $J = 14.5, 8.0, 7.0$  Hz, 1H), 2.69 (ddd,  $J = 14.5, 8.0, 7.0$  Hz, 1H), 2.11 (ddt,  $J = 15.0, 7.5, 7.0$  Hz, 1H), 2.01 (ddt,  $J = 15.0, 7.5, 7.0$  Hz, 1H), 1.19 (t,  $J = 7.0$  Hz, 3H).  $^{13}\text{C}\{^1\text{H}\}$  NMR ( $\text{CDCl}_3$ ):  $\delta$  166.21, 166.18, 165.78, 159.47, 149.62, 136.74, 131.90, 131.58, 129.88, 129.87, 128.62, 128.54, 127.73, 127.67, 123.36 (q,  $^1J_{CF} = 288.9$  Hz, 1C), 123.26 (q,  $^1J_{CF} = 288.5$  Hz, 1C), 122.98, 121.77, 84.76 (q,  $^2J_{CF} = 28.0$  Hz, 1C), 84.74 (q,  $^2J_{CF} = 27.7$  Hz, 1C), 74.56, 73.68, 62.63, 55.88, 55.50, 33.47, 29.72, 14.01.  $^{19}\text{F}\{^1\text{H}\}$  NMR ( $\text{CDCl}_3$ ):  $\delta$  -71.79, -72.06.

**Figure S4.** Comparison of (*R*)-MTPA esters of *rac*-**16** and (*R*)-MTPA esters of **16** made by Sharpless dihydroxylation.

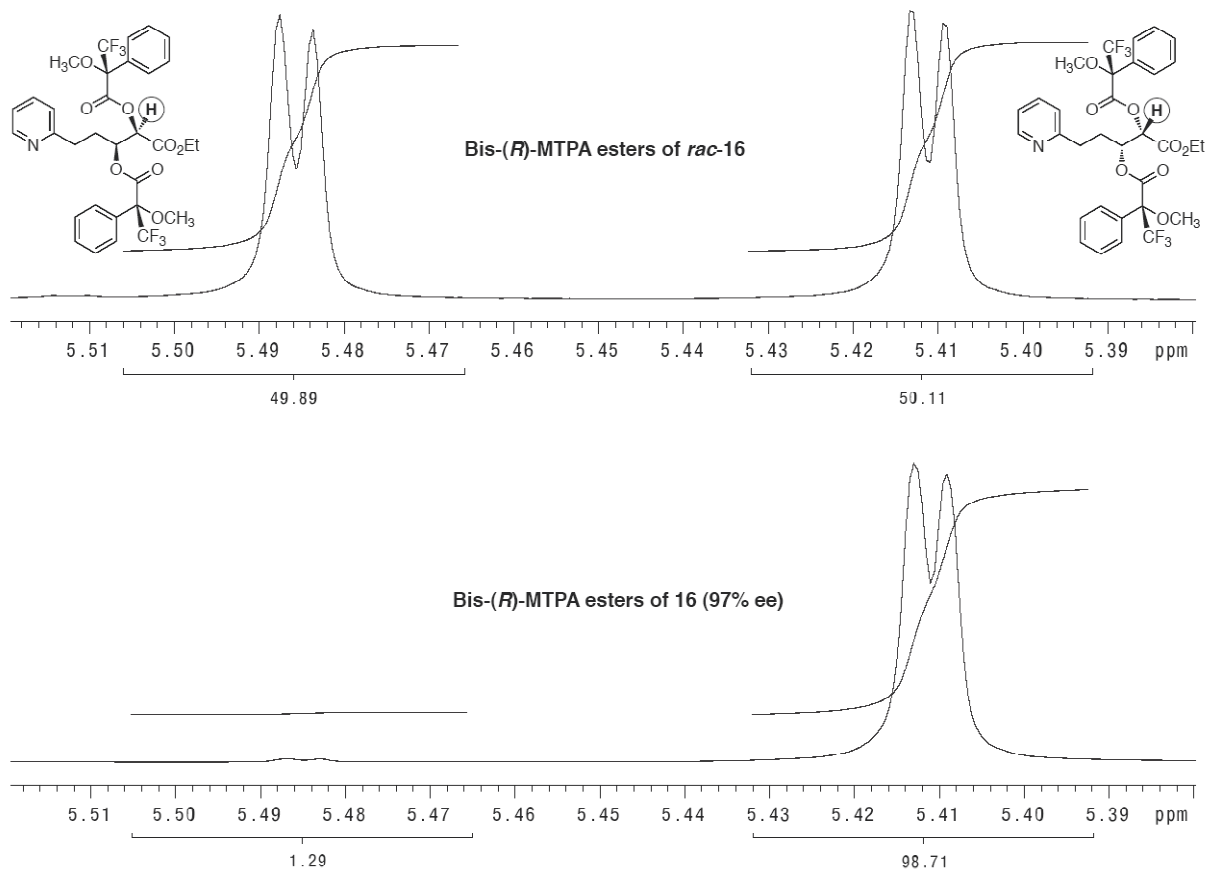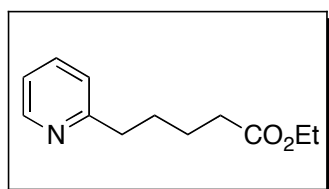

To a 20 mL scintillation vial was added palladium on carbon (10.6 mg, 10 wt% Pd/C, 0.01 mmol, 10 mol % Pd, Aldrich), **15** (20.7 mg, 0.1 mmol) and MeOH (0.5 mL). The vial was fitted with a 24/40 septum and was stirred at room temperature for 10 h under a balloon of hydrogen. The solvent was evaporated, and the product was purified by chromatography on silica gel, eluting with 60:40 hexanes/ethyl acetate. Compound **17** was obtained as a colorless oil (9.6 mg, 90% yield,  $R_f = 0.3$  in 60:40 hexanes/ethyl acetate). <sup>1</sup>H NMR (CDCl<sub>3</sub>): δ 8.52 (dd,  $J = 4.8, 0.8$  Hz, 1H), 7.59 (app. td,  $J = 7.6, 2.0$  Hz, 1H), 7.14 (d,  $J = 7.6$  Hz, 1H), 7.10 (dd,  $J = 7.6, 5.2$  Hz, 1H), 4.12 (q,  $J = 7.2$  Hz, 2H), 2.81 (t,  $J = 7.2$  Hz, 2H), 2.34 (t,  $J = 7.6$  Hz, 2H), 1.80-1.68 (multiple peaks, 4H), 1.25 (t,  $J = 7.2$  Hz, 3H). <sup>13</sup>C{<sup>1</sup>H} NMR (CDCl<sub>3</sub>): δ 173.84, 161.99, 149.47, 136.50, 122.94, 121.21, 60.44, 38.19, 34.40, 29.44, 24.86, 14.45. IR (thin film): 1732 cm<sup>-1</sup>. HRMS electrospray ( $m/z$ ): [M+H]<sup>+</sup> calcd for C<sub>12</sub>H<sub>18</sub>NO<sub>2</sub><sup>+</sup> 208.1332; found 208.1331.

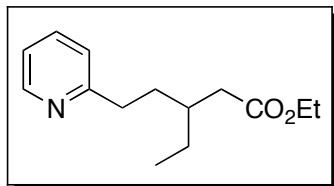

Copper(I) bromide (7 mg, 0.05 mmol, 10 mol %, Fisher) and lithium chloride (4 mg, 0.1 mmol, 20 mol %, Fisher) were added to an oven-dried 5 mL Schlenk tube under nitrogen. The tube was evacuated, heated with a heat gun, allowed to cool to room temperature under vacuum, and filled with nitrogen. Dry THF (1 mL) was added, and the mixture stirred for 10 min. The tube was placed in an ice bath, and after 10 min, a solution of **15** (103 mg, 0.50 mmol, 1 equiv) in dry THF (1 mL) was added followed by TMSCl (70  $\mu$ L, 0.55 mmol, 1.1 equiv, Aldrich). The solution was stirred at 0  $^{\circ}$ C for 15 min, and then 3 M EtMgBr in Et<sub>2</sub>O (250  $\mu$ L, 0.75 mmol, 1.5 equiv, Aldrich) was added dropwise. The solution was stirred for 1 h at 0  $^{\circ}$ C and then poured into 10 mL of saturated aqueous NH<sub>4</sub>Cl. The mixture was extracted with Et<sub>2</sub>O (3 x 20 mL). The Et<sub>2</sub>O extracts were combined, washed with brine, dried over Na<sub>2</sub>SO<sub>4</sub>, and concentrated under vacuum. The crude product was purified by chromatography on silica gel, eluting with 80:20 hexanes/ethyl acetate, to provide product **18** as a colorless oil (222 mg, 94% yield, R<sub>f</sub> = 0.22 in 70:30 hexanes/ethyl acetate). <sup>1</sup>H NMR (CDCl<sub>3</sub>):  $\delta$  8.51 (ddd, *J* = 4.8, 2.0, 0.8 Hz, 1H), 7.58 (app. td, *J* = 7.6, 2.0 Hz, 1H), 7.14 (d, *J* = 7.6 Hz, 1H), 7.09 (ddd, *J* = 7.6, 4.8, 1.2 Hz, 1H), 4.12 (q, *J* = 7.2 Hz, 2H), 2.79 (t, *J* = 4.0 Hz, 2H), 2.31 (d, *J* = 6.8 Hz, 2H), 1.90 (tq, *J* = 6.8, 6.4 Hz, 1H), 1.82-1.66 (multiple peaks, 2H), 1.51-1.34 (multiple peaks, 2H), 1.24 (t, *J* = 7.2 Hz, 3H), 0.90 (t, *J* = 7.2 Hz, 3H). <sup>13</sup>C{<sup>1</sup>H} NMR (CDCl<sub>3</sub>):  $\delta$  173.57, 162.36, 149.41, 136.48, 122.83, 121.14, 60.33, 38.83, 36.43, 35.75, 33.75, 26.37, 14.44, 10.89. IR (thin film): 1734 cm<sup>-1</sup>. HRMS electrospray (*m/z*): [M+H]<sup>+</sup> calcd for C<sub>14</sub>H<sub>22</sub>NO<sub>2</sub><sup>+</sup> 236.1645; found 236.1645.

## VIII. References

---

- <sup>1</sup> Tsigdinos, G. A.; Hallada, C. J. *Inorg. Chem.* **1968**, *7*, 437-441.
- <sup>2</sup> Villabrille, P.; Romanelli G.; Vazquez, P.; Caceres, C. *App. Cat. A; Gen.* **2004**, *270*, 101-111.
- <sup>3</sup> Pittelkow, M.; Christensen, J. B. *Org. Lett.* **2005**, *7*, 1295-1298.
- <sup>4</sup> Bell, T. W.; Hu, L. Y.; Patel, S. V. *J. Org. Chem.* **1987**, *52*, 3847-3850.
- <sup>5</sup> Pasquinet, E.; Rocca, P.; Marsais, F.; Godard, A.; Quéguiner, G. *Tetrahedron* **1998**, *54*, 8771-8782.
- <sup>6</sup> Wallace, D. J.; Chen, C. Y. *Tetrahedron Lett.* **2002**, *43*, 6987-6990.
- <sup>7</sup> Zhang, C. X.; Liang, H. C.; Kim, E.; Shearer, J.; Helton, M. E.; Kim, E.; Kaderli, S.; Incarvito, C. D.; Rheingold, A. L.; Zuberbuhler, A. D.; Karlin, K. D. *J. Am. Chem. Soc.* **2003**, *125*, 634-635.
- <sup>8</sup> Baldwin, J. E.; Fryer, A. M.; Pritchard, G. J. *J. Org. Chem.* **2001**, *66*, 2588-2596.
- <sup>9</sup> Kolb, H. C.; VanNieuwenhze, M. S.; Sharpless, K. B. *Chem. Rev.* **1994**, *94*, 2483-2547.
- <sup>10</sup> Dale, J. A.; Mosher, H. S. *J. Am. Chem. Soc.* **1968**, *90*, 3732-3738.

Sample Name :

Data Collected on :  
Co. Chem. USA. Umich. edu -vnmr-s400  
Archive directory:

Sample directory:

Fidfile: 9kjsetime-sm

Pulse Sequence: PROTON (szpu1)  
Solvent: cdcl3  
Data collected on: Jan 11 2011

Temp. 23.0 C / 296.1 K  
Operator: kstowers

Relax. delay 0.500 sec  
Pulse 45.0 degrees  
Acq. time 3.500 sec  
Width 6410.3 Hz  
16 repetitions  
OBSERVE H1, 400.5206274 MHz  
DATA PROCESSING  
Line broadening 0.3 Hz  
FT size 65536  
Total time 1 min 12 sec

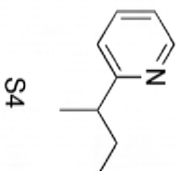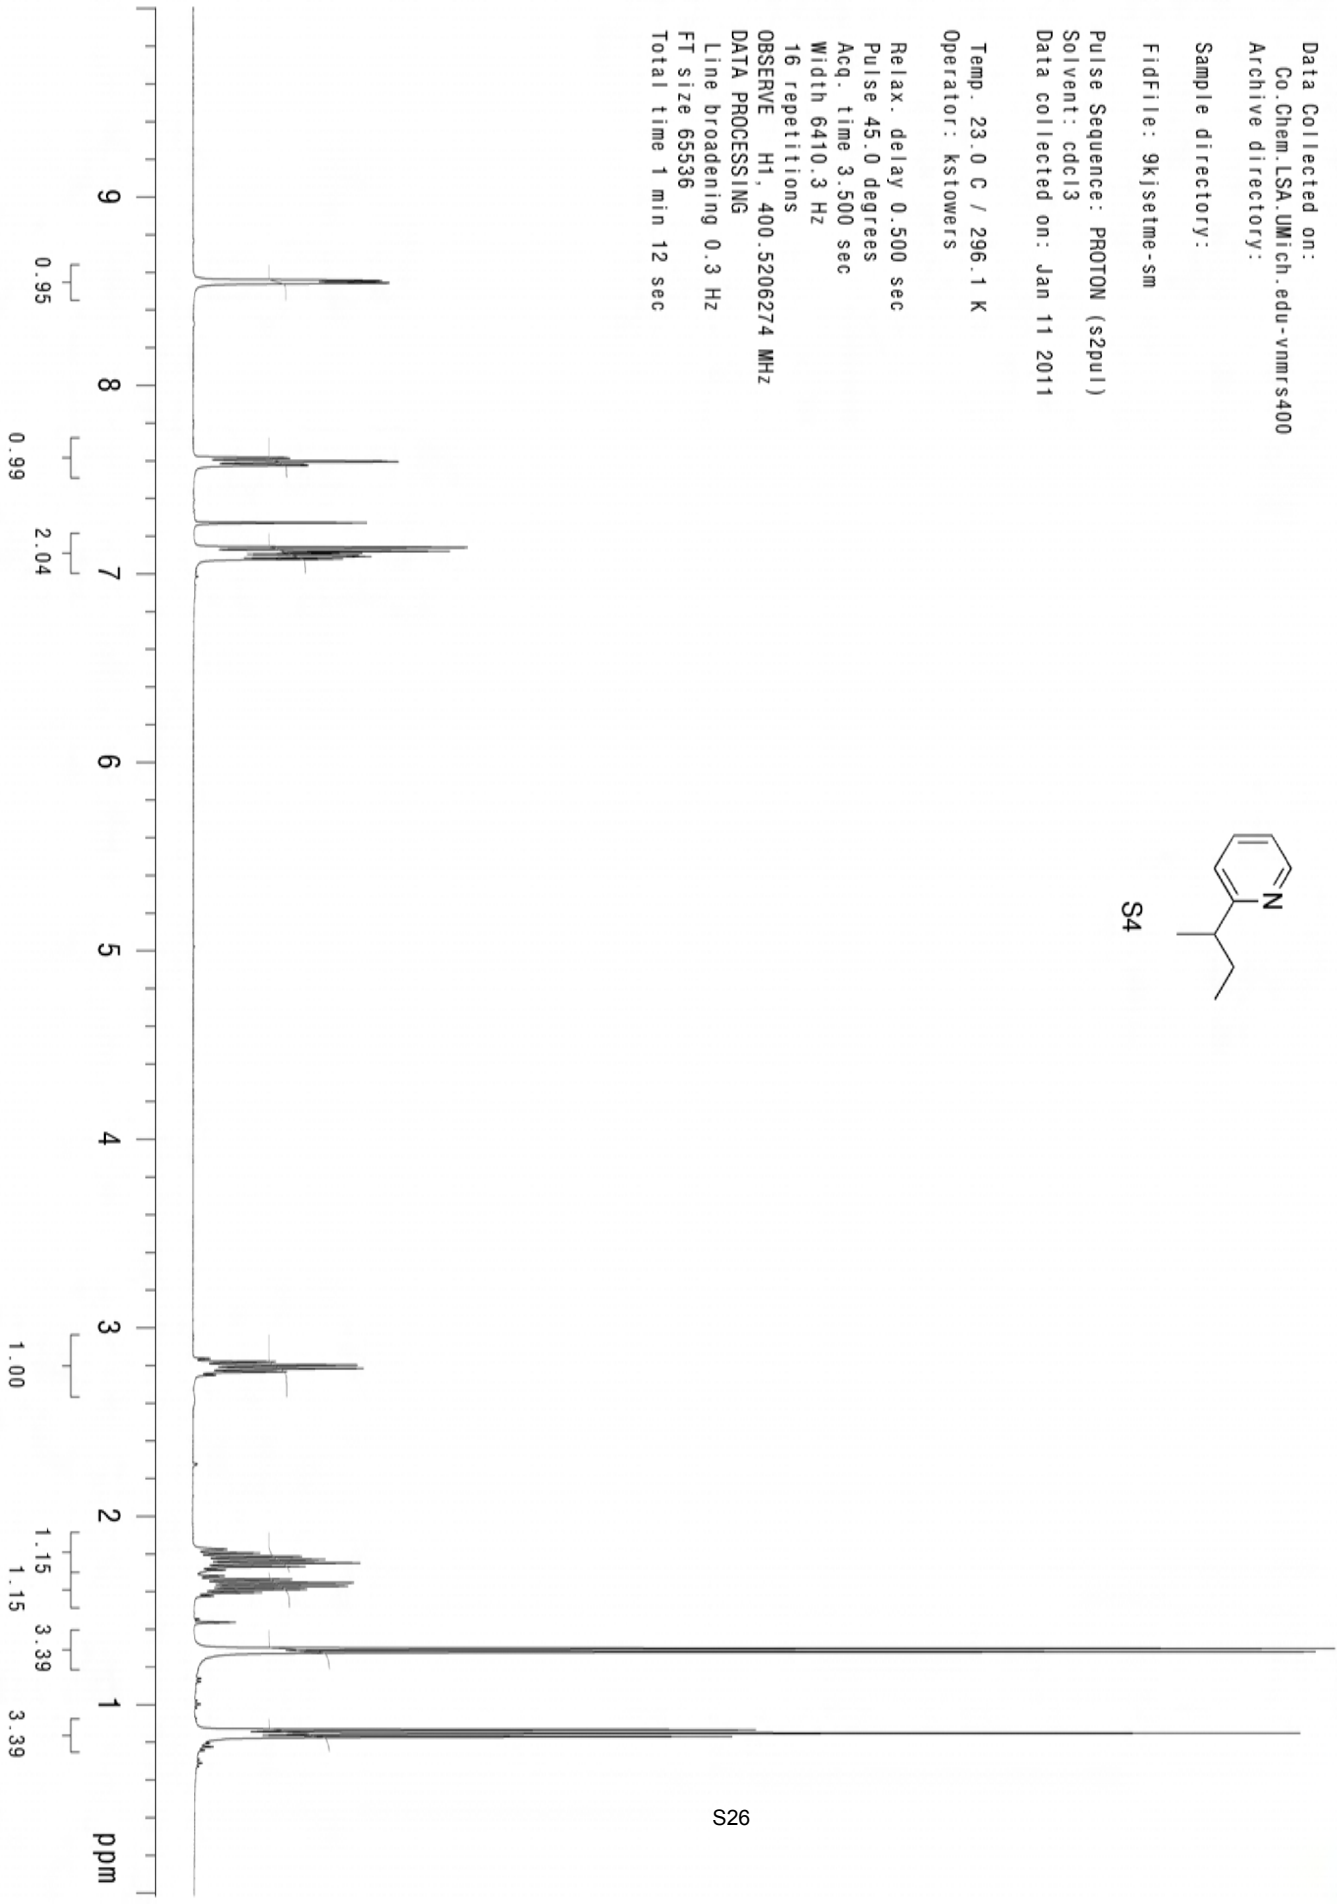

Sample Name :

Data Collected on :  
Co. Chem. USA. UMich. edu -vnmr.s400  
Archive directory:

Sample directory :

Fidfile : 9kjsetme-smc

Pulse Sequence : CARBON (szpu1)  
Solvent : cdcl3  
Data collected on : Jan 11 2011

Temp. 23.0 C / 296.1 K  
Operator : kstowers

Relax. delay 0.100 sec  
Pulse 45.0 degrees  
Acq. time 2.569 sec  
Width 25510.2 Hz  
160 repetitions  
OBSERVE C13, 100.7109708 MHz  
DECOUPLE H1, 400.5226414 MHz  
Power 41 dB  
continuously on  
WALTZ-16 modulated  
DATA PROCESSING  
Line broadening 1.0 Hz  
FT size 131072  
Total time 7 min 8 sec

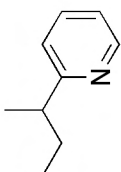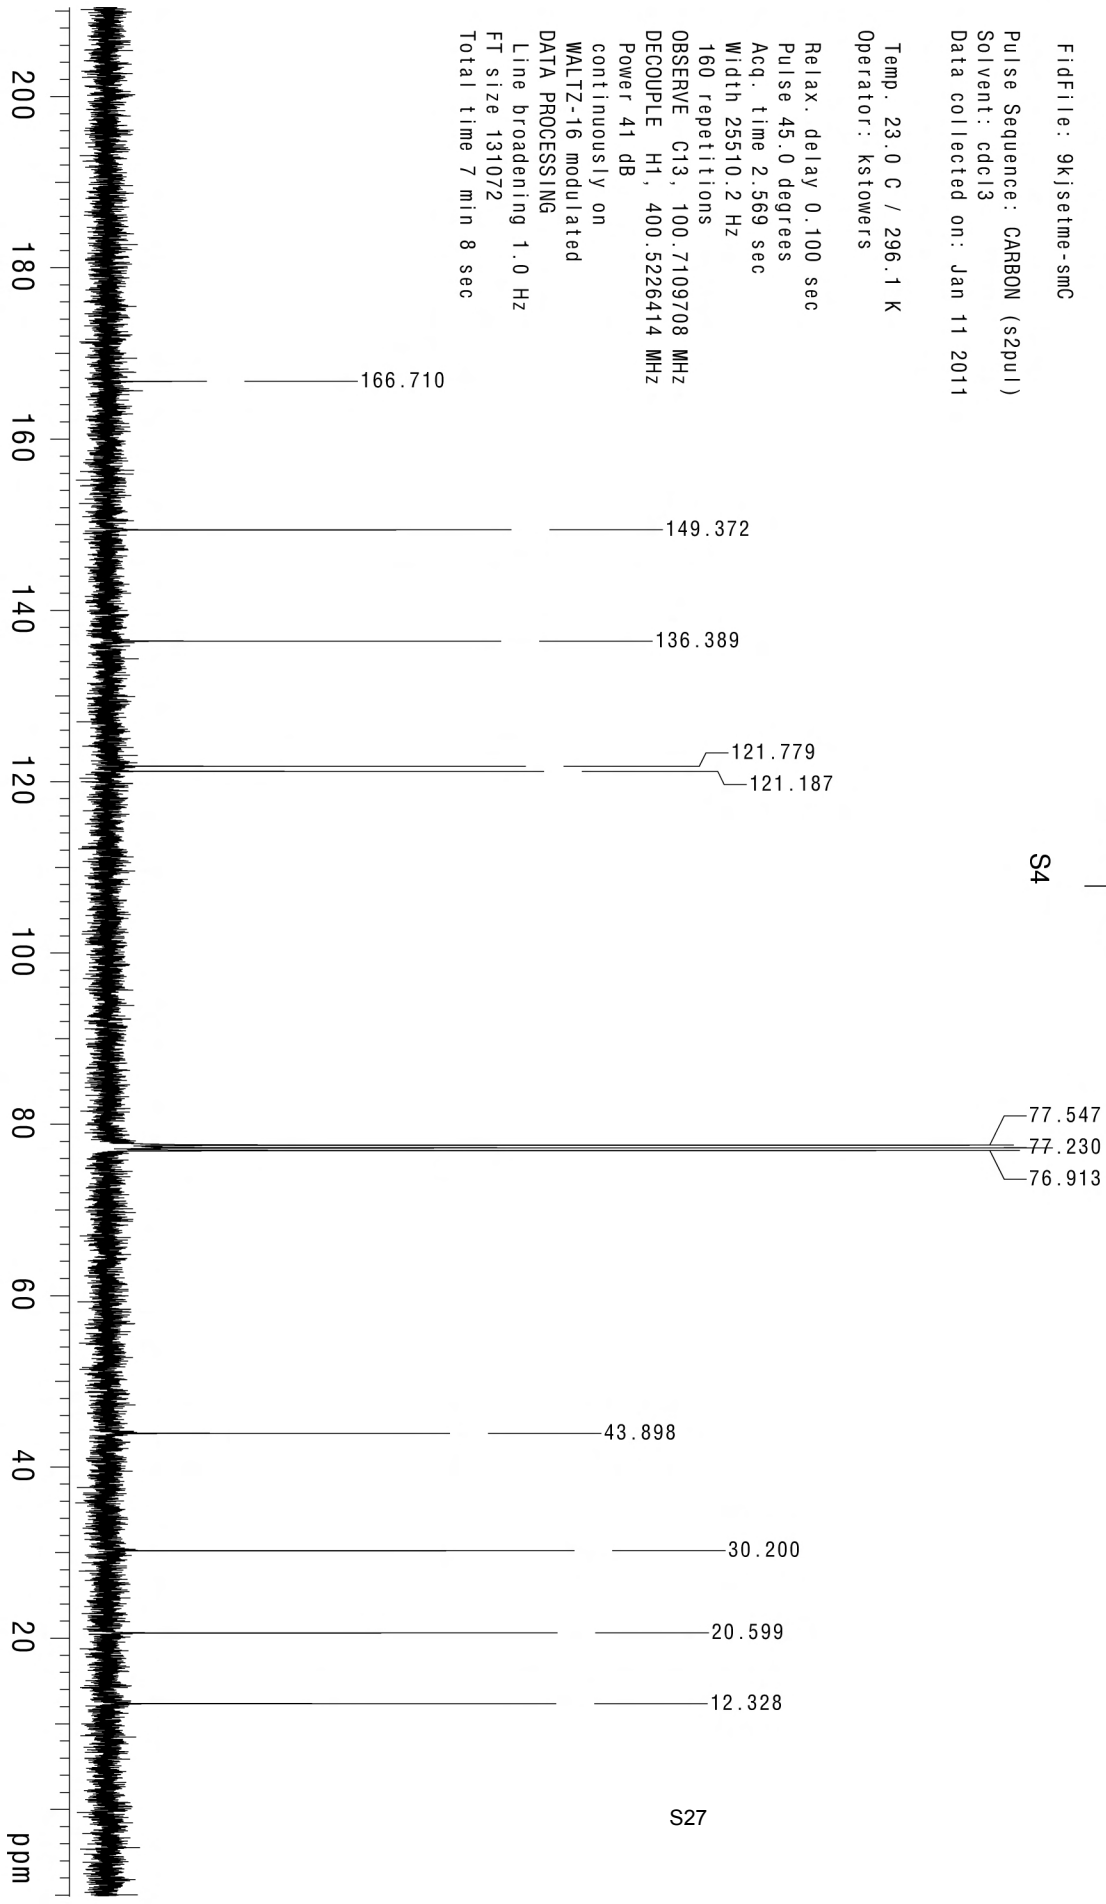

S27

Sample Name :

Data Collected on :  
Co. Chem. USA. Umich. edu -vnmr-s400  
Archive directory :

Sample directory :

Fidfile: 9k1jscyclopr-sm

Pulse Sequence: PROTON (szpu1)  
Solvent: cdcl3  
Data collected on: Jan 11 2011

Temp. 23.0 C / 296.1 K  
Operator: kstowers

Relax. delay 0.500 sec  
Pulse 45.0 degrees  
Acq. time 3.500 sec  
Width 6410.3 Hz  
16 repetitions  
OBSERVE H1, 400.5206311 MHz  
DATA PROCESSING  
Line broadening 0.3 Hz  
FT size 65536  
Total time 1 min 12 sec

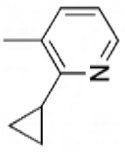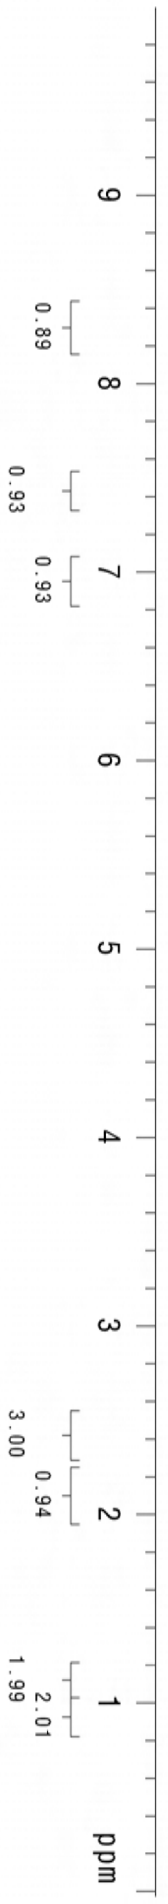



Sample Name :

Data Collected on :  
Co. Chem. USA. UMich. edu -vnmr-s400  
Archive directory:

Sample directory:

Fidfile : 9kjscyclopr-smc

Pulse Sequence : CARBON (szpu1)  
Solvent : cdcl3  
Data collected on : Jan 11 2011

Temp. 23.0 C / 296.1 K  
Operator : kstowers

Relax. delay 0.100 sec  
Pulse 45.0 degrees  
Acq. time 2.569 sec  
Width 25510.2 Hz  
16 repetitions  
OBSERVE C13, 100.7109711 MHz  
DECOUPLE H1, 400.5226414 MHz  
Power 41 dB  
continuously on  
WALTZ-16 modulated  
DATA PROCESSING  
Line broadening 1.0 Hz  
FT size 131072  
Total time 0 min 43 sec

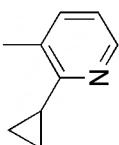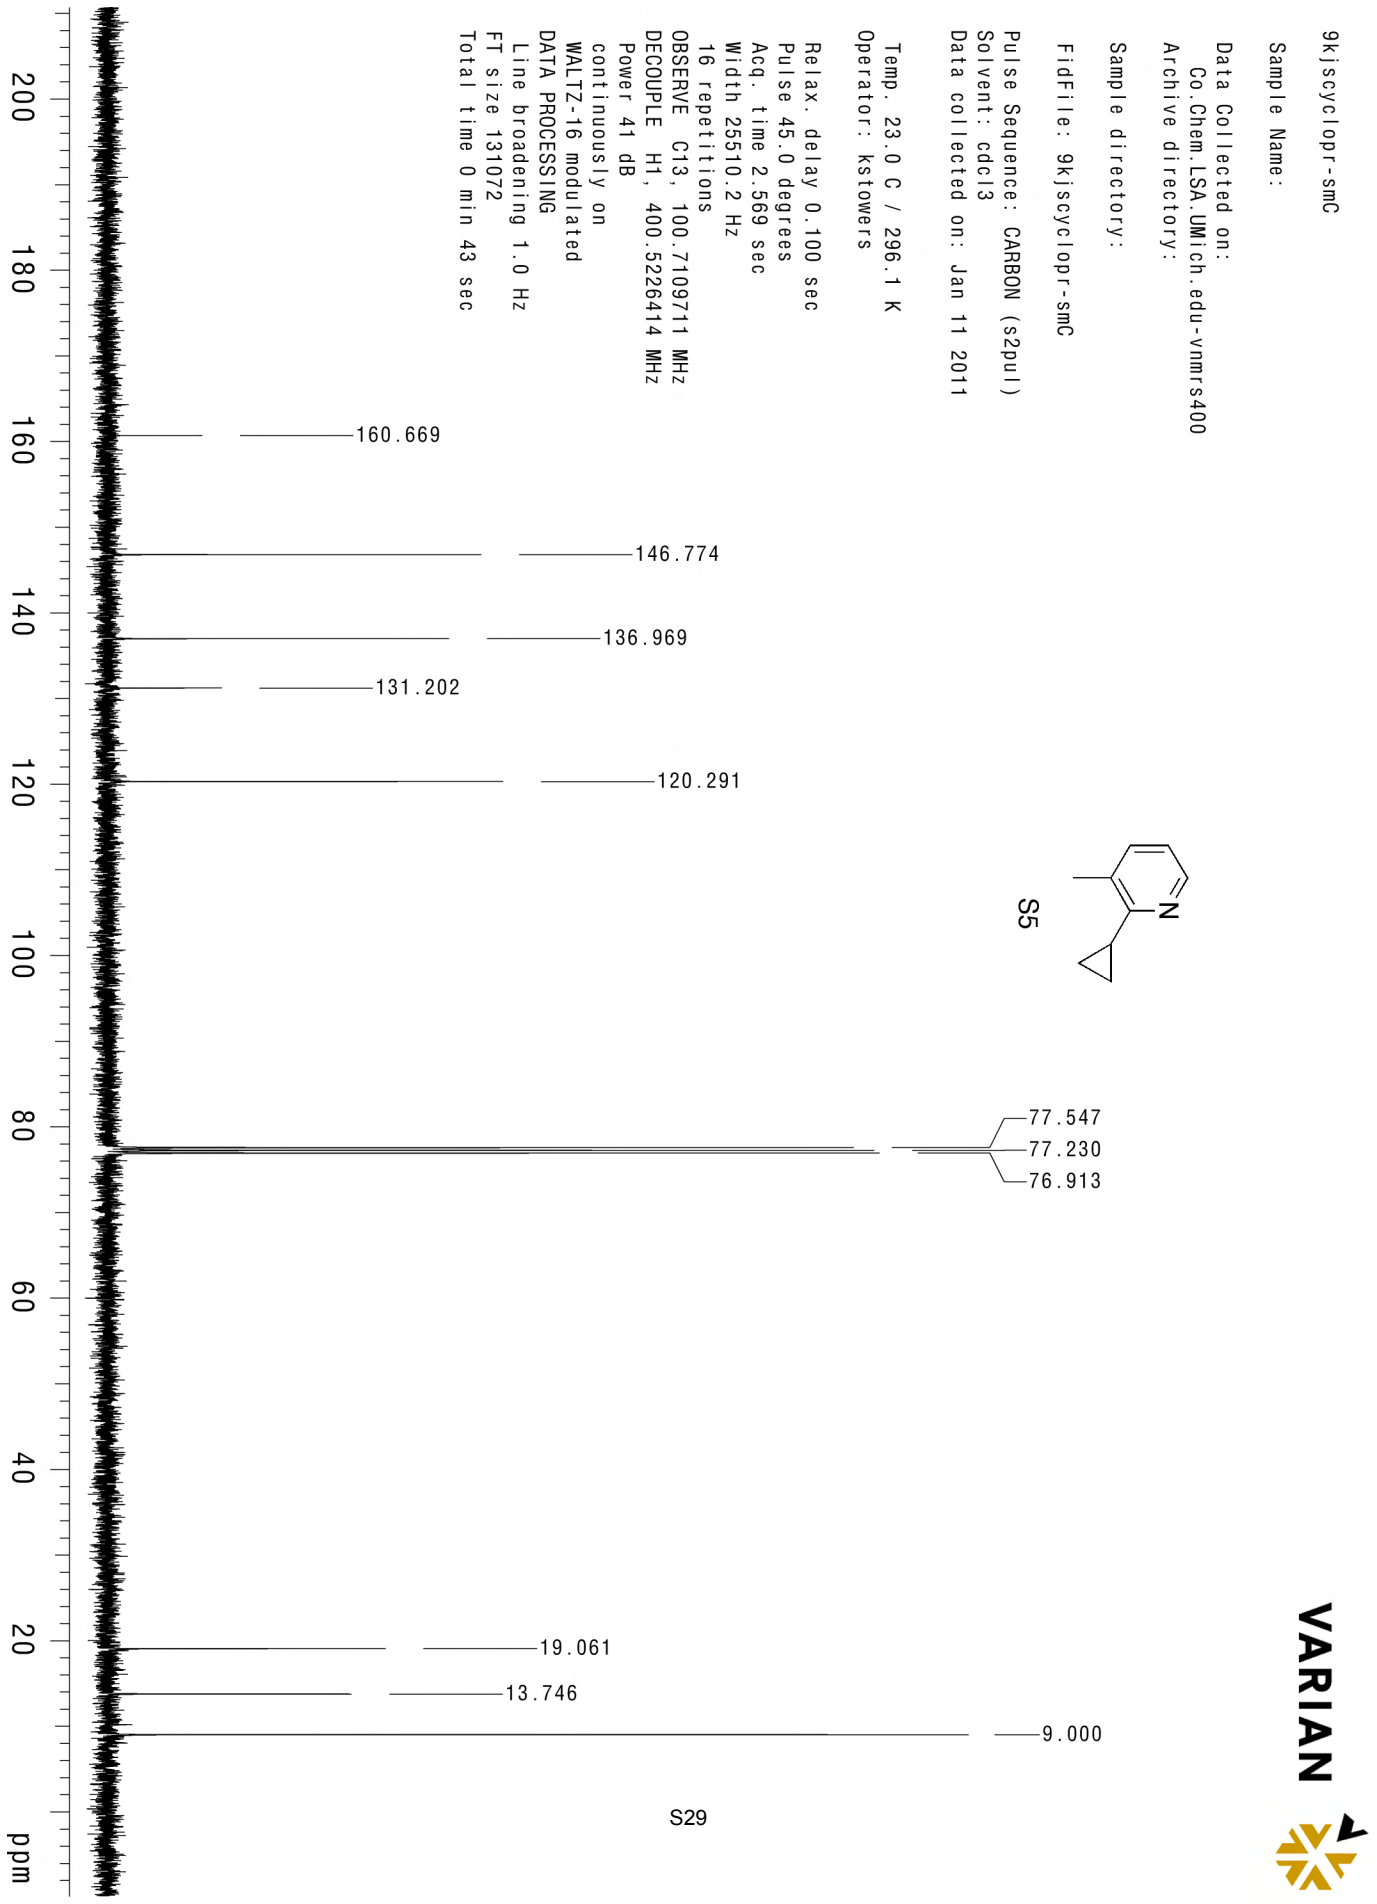

Sample Name :

Data Collected on :  
Ga.Chem.LSA.UMich.edu-vnmrs400  
Archive directory:

Sample directory:

Fidfile: 9kjs6x-mMe

Pulse Sequence: PROTON (szpu1)  
Solvent: cdcl3  
Data collected on: Feb 10 2011

Temp. 31.0 C / 304.1 K  
Operator: kstowers

Relax. delay 0.500 sec  
Pulse 45.0 degrees  
Acq. time 3.500 sec  
Width 6410.3 Hz  
16 repetitions  
OBSERVE H1, 399.5389149 MHz  
DATA PROCESSING  
Line broadening 0.3 Hz  
FT size 65536  
Total time 1 min 24 sec

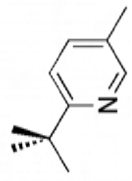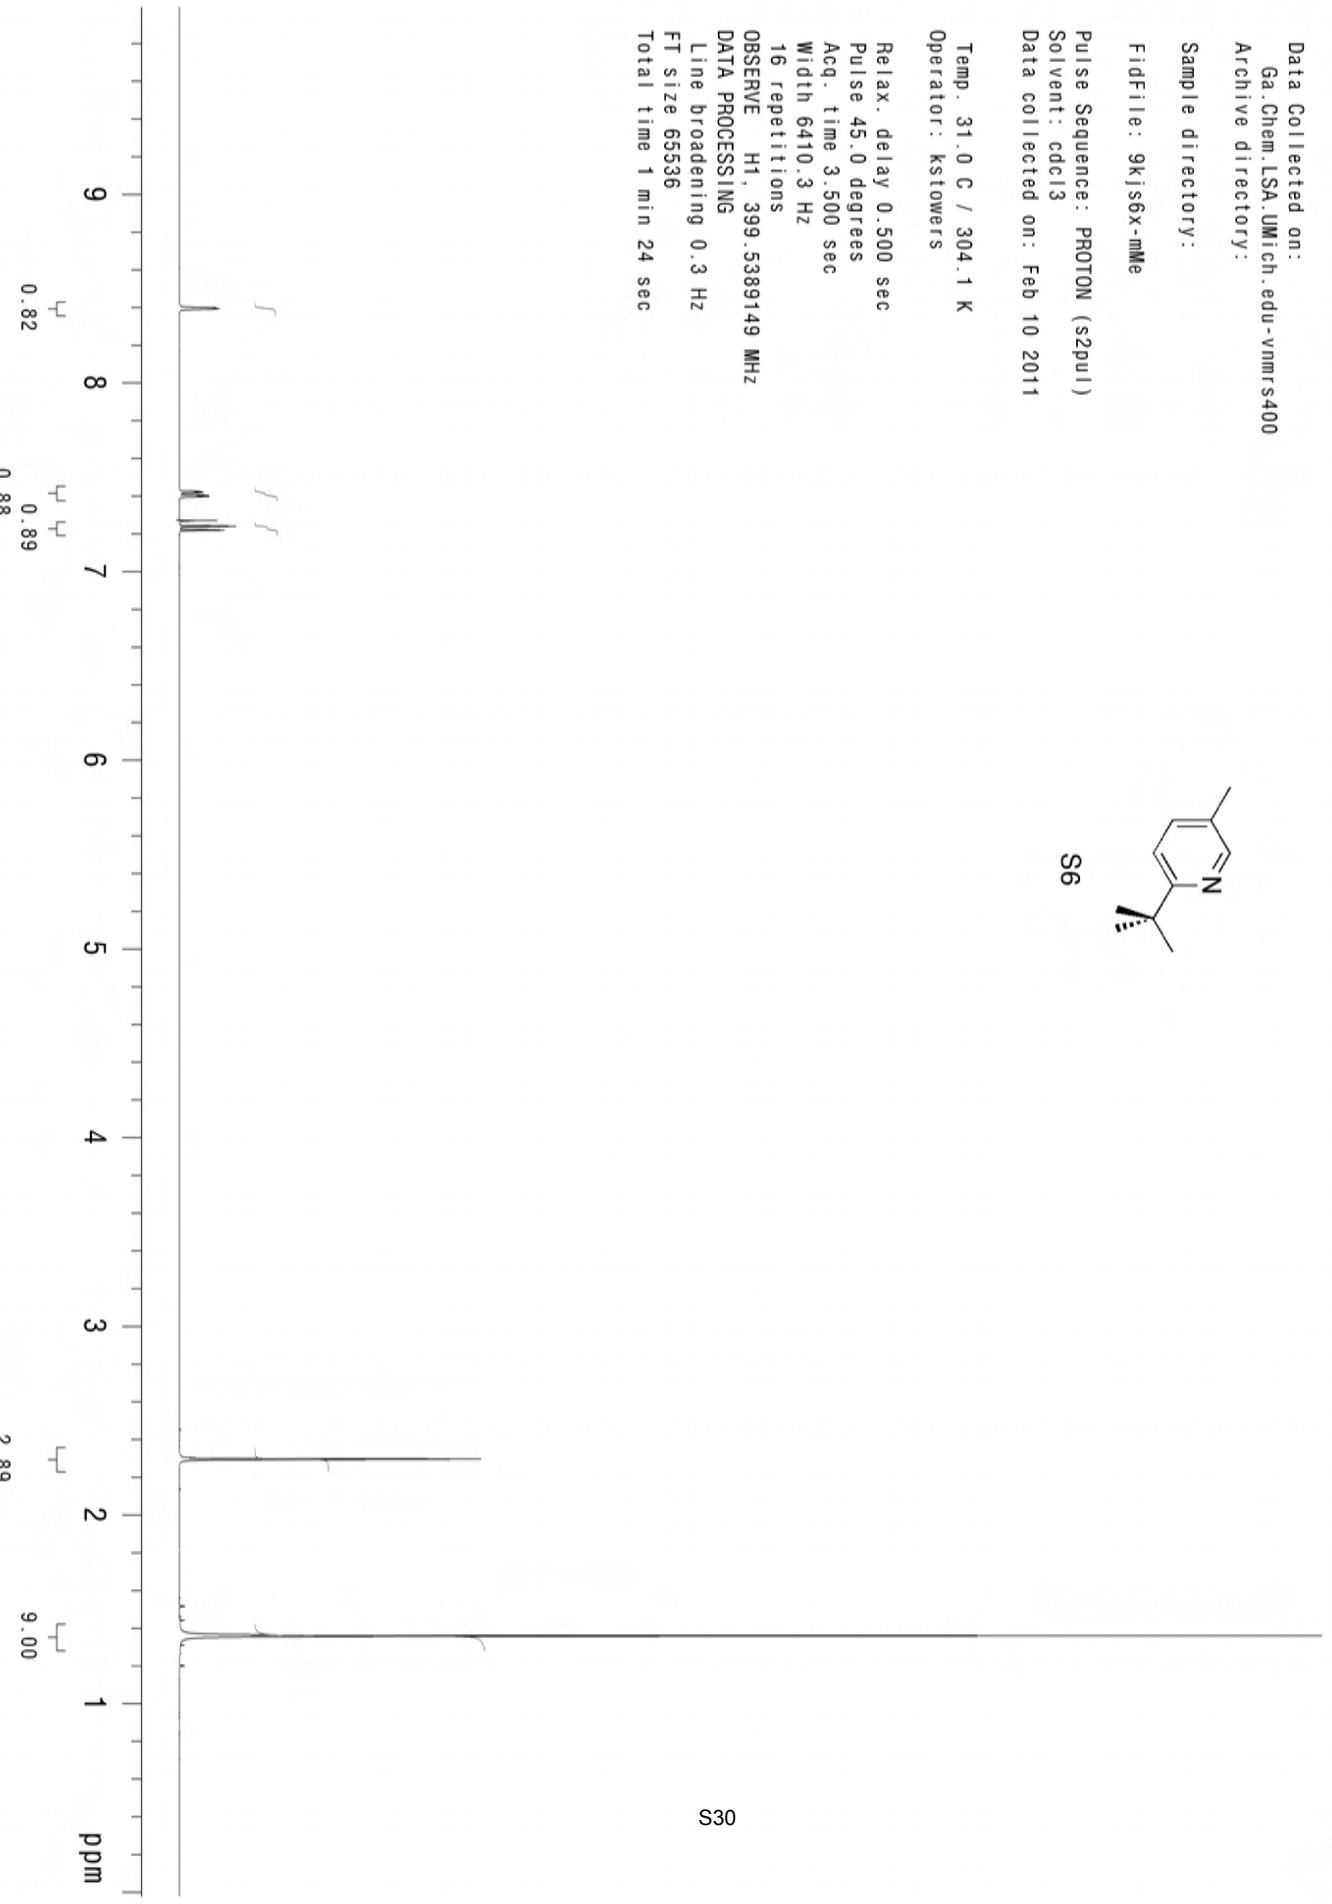

Sample Name :

Data Collected on :  
Ga. Chem. USA. UMich. edu-vmnms400  
Archive directory :

Sample directory :

Fidfile : 9kjs6x-mMe-C

Pulse Sequence : CARBON (szpul)

Solvent : cdcl3

Data collected on : Feb 10 2011

Temp. 31.0 C / 304.1 K  
Operator : kstowers

Relax. delay 0.100 sec  
Pulse 45.0 degrees  
Acq. time 2.569 sec  
Width 25510.2 Hz  
624 repetitions  
OBSERVE C13, 100.4641163 MHz  
DECOUPLE H1, 399.5409236 MHz  
Power 35 dB  
continuously on  
WALTZ-16 modulated  
DATA PROCESSING  
Line broadening 1.0 Hz  
FT size 131072  
Total time 27 min

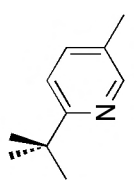

S6

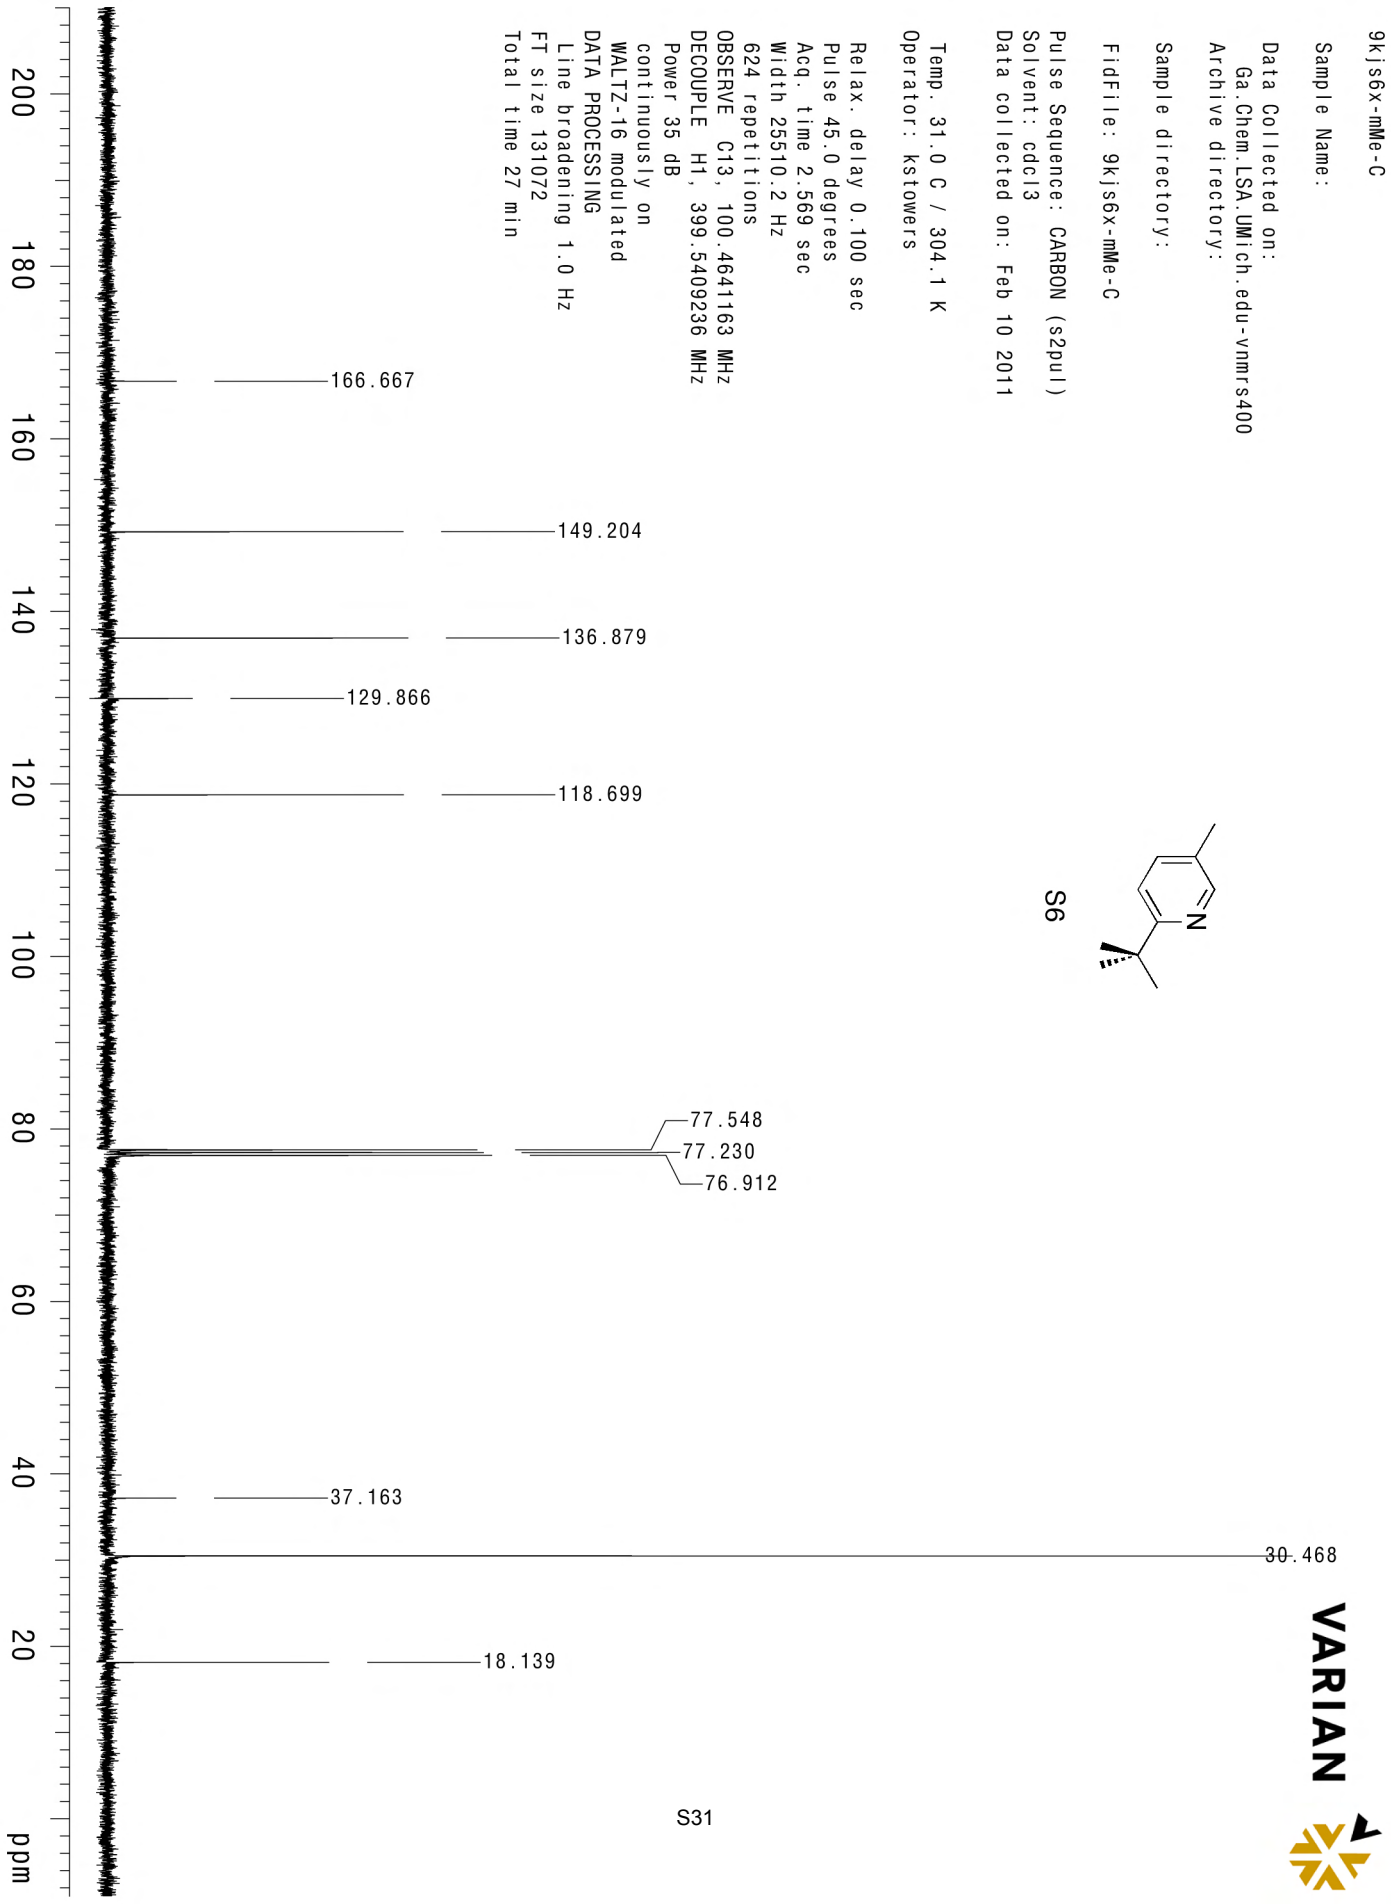

Sample Name :

Data Collected on:  
Co. Chem. LSA. Umich. edu - vnmrs400  
Archive directory:

Sample directory:

Fidfile: 8kjsa-OMe-1HNMR

Pulse Sequence: PROTON (szpul)  
Solvent: cdcl3  
Data collected on: Nov 30 2010

Operator: kstowers

Relax. delay 0.500 sec  
Pulse 45.0 degrees  
Acq. time 3.500 sec  
Width 6410.3 Hz  
16 repetitions  
OBSERVE H1, 400.5206274 MHz  
DATA PROCESSING  
Line broadening 0.3 Hz  
FT size 65536  
Total time 1 min 12 sec

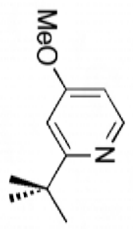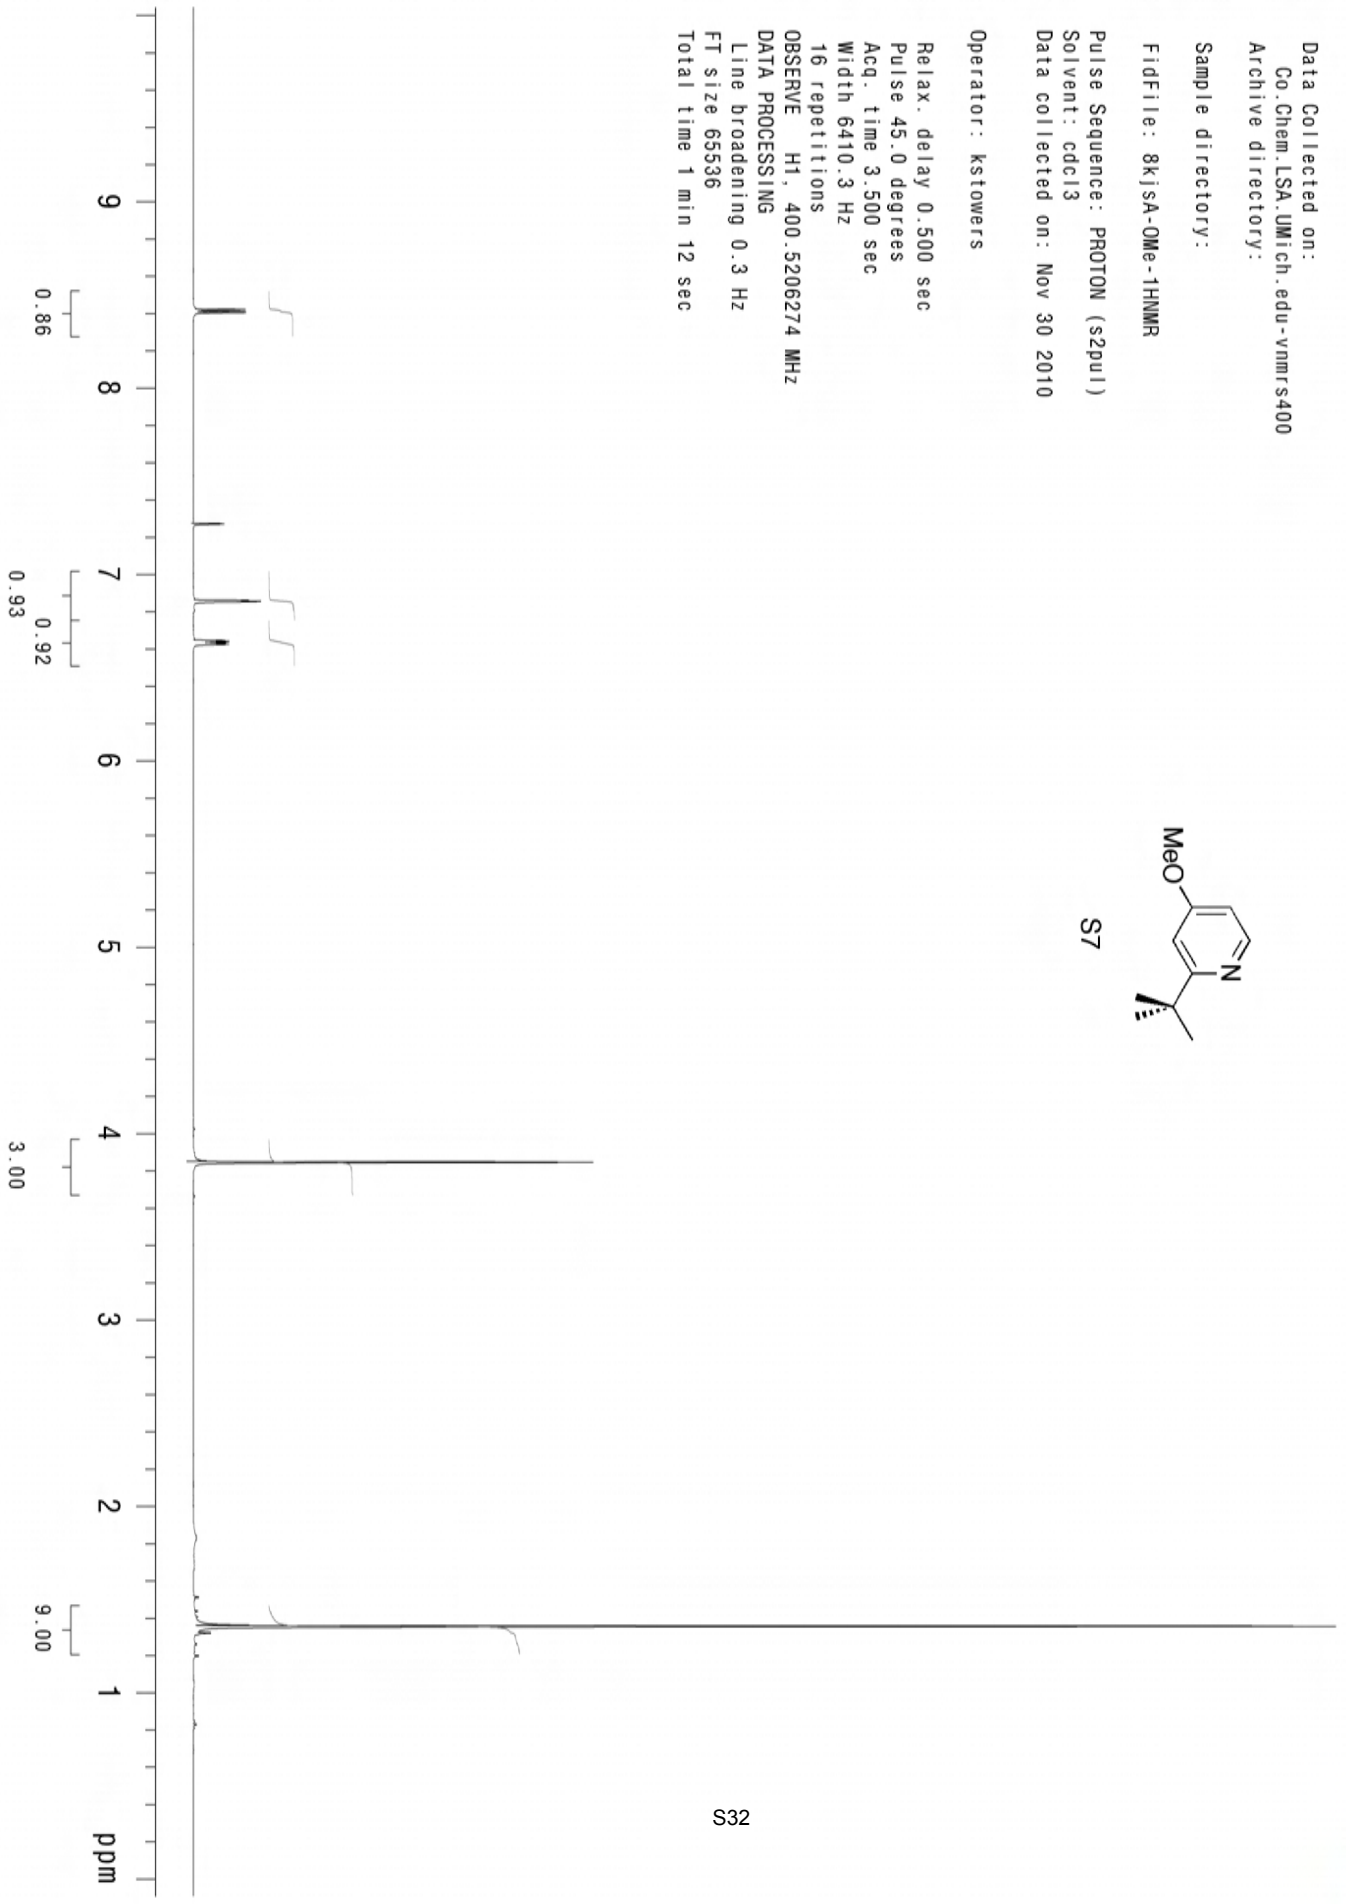

Sample Name :

Data Collected on :  
Co. Chem. USA. UMich. edu -vnmr-s400  
Archive directory :

Sample directory :

Fidfile : 8kjsa-OMe-CNMNR

Pulse Sequence : CARBON (szpu1)  
Solvent : cdcl3  
Data collected on : Nov 30 2010

Operator : kstowers

Relax. delay 0.100 sec  
Pulse 45.0 degrees  
Acq. time 2.569 sec  
Width 25510.2 Hz  
192 repetitions  
OBSERVE C13, 100.7109704 MHz  
DECOUPLE H1, 400.5226414 MHz  
Power 41 dB  
continuously on  
WALTZ-16 modulated  
DATA PROCESSING  
Line broadening 1.0 Hz  
FT size 131072  
Total time 8 min 34 sec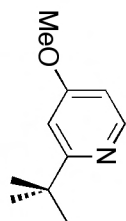

S7

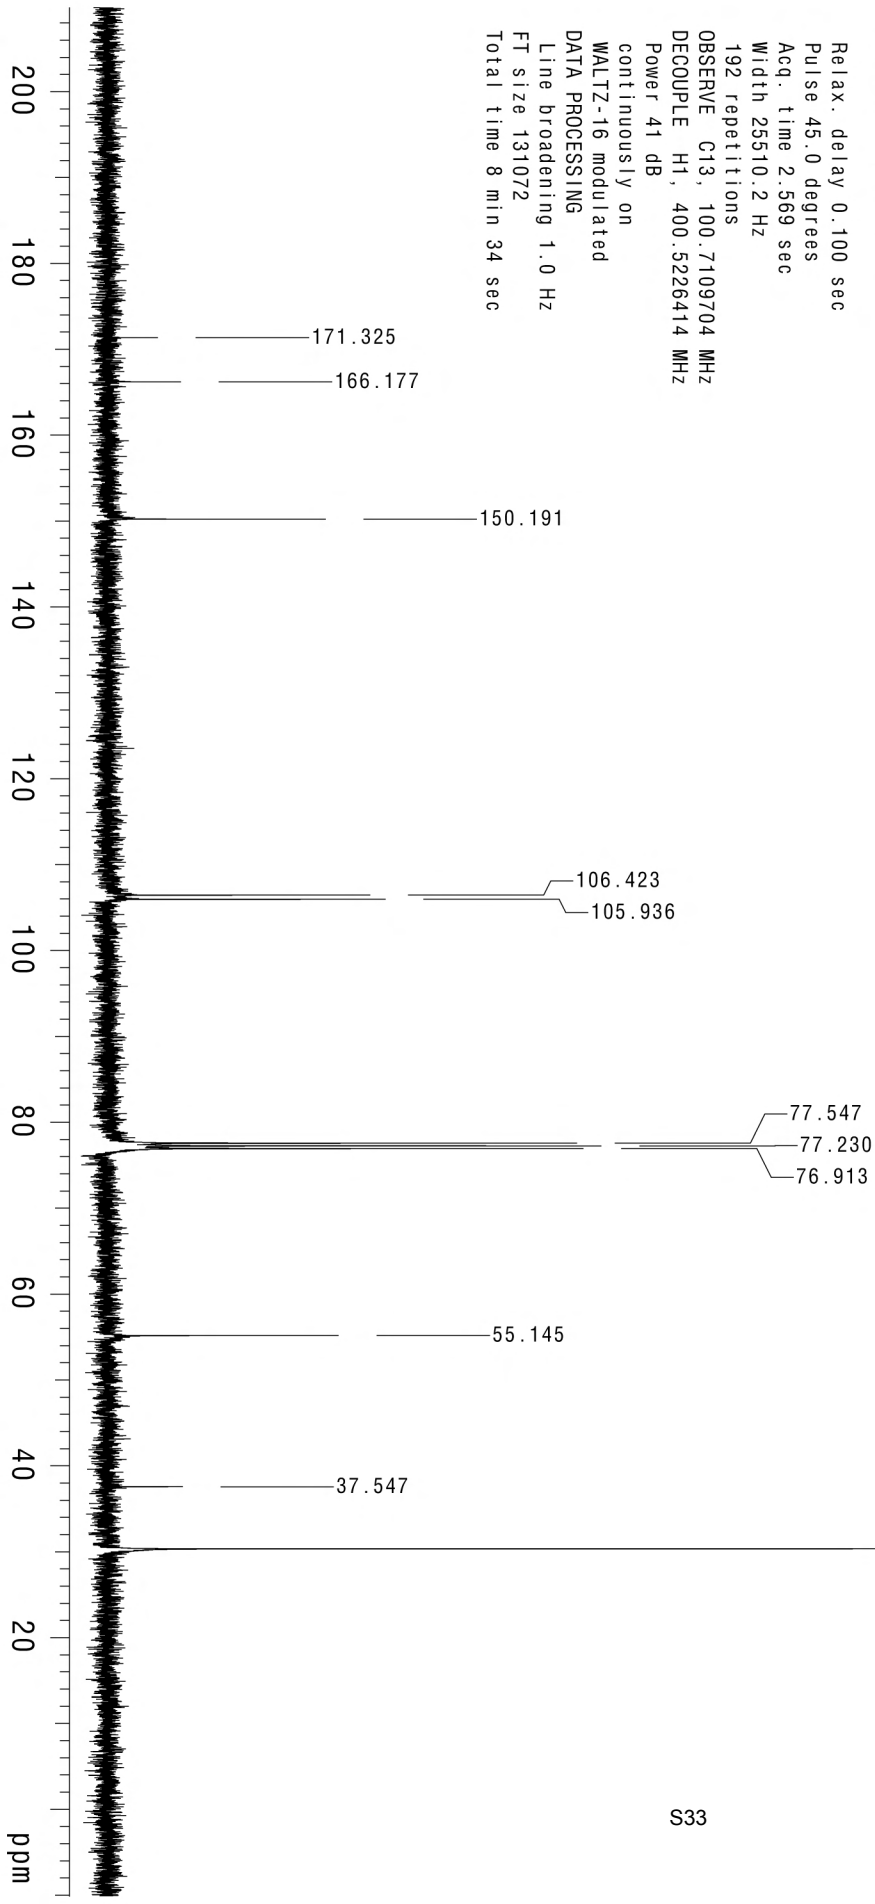

Sample Name:

Data Collected on:  
Ga. Chem. LSA.UMich.edu-vnmrs400  
Archive directory:

Sample directory:

Fidfile: 9kjscf3-smist

Pulse Sequence: PROTON (s2pu1)  
Solvent: cdcl3  
Data collected on: Jan 26 2011

Operator: kstowers

Relax. delay 0.500 sec  
Pulse 45.0 degrees  
Acq. time 3.500 sec  
Width 6410.3 Hz  
Single scan  
OBSERVE H1, 399.5389148 MHz  
DATA PROCESSING  
Line broadening 0.3 Hz  
FT size 65536  
Total time 0 min 12 sec

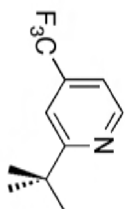

S8

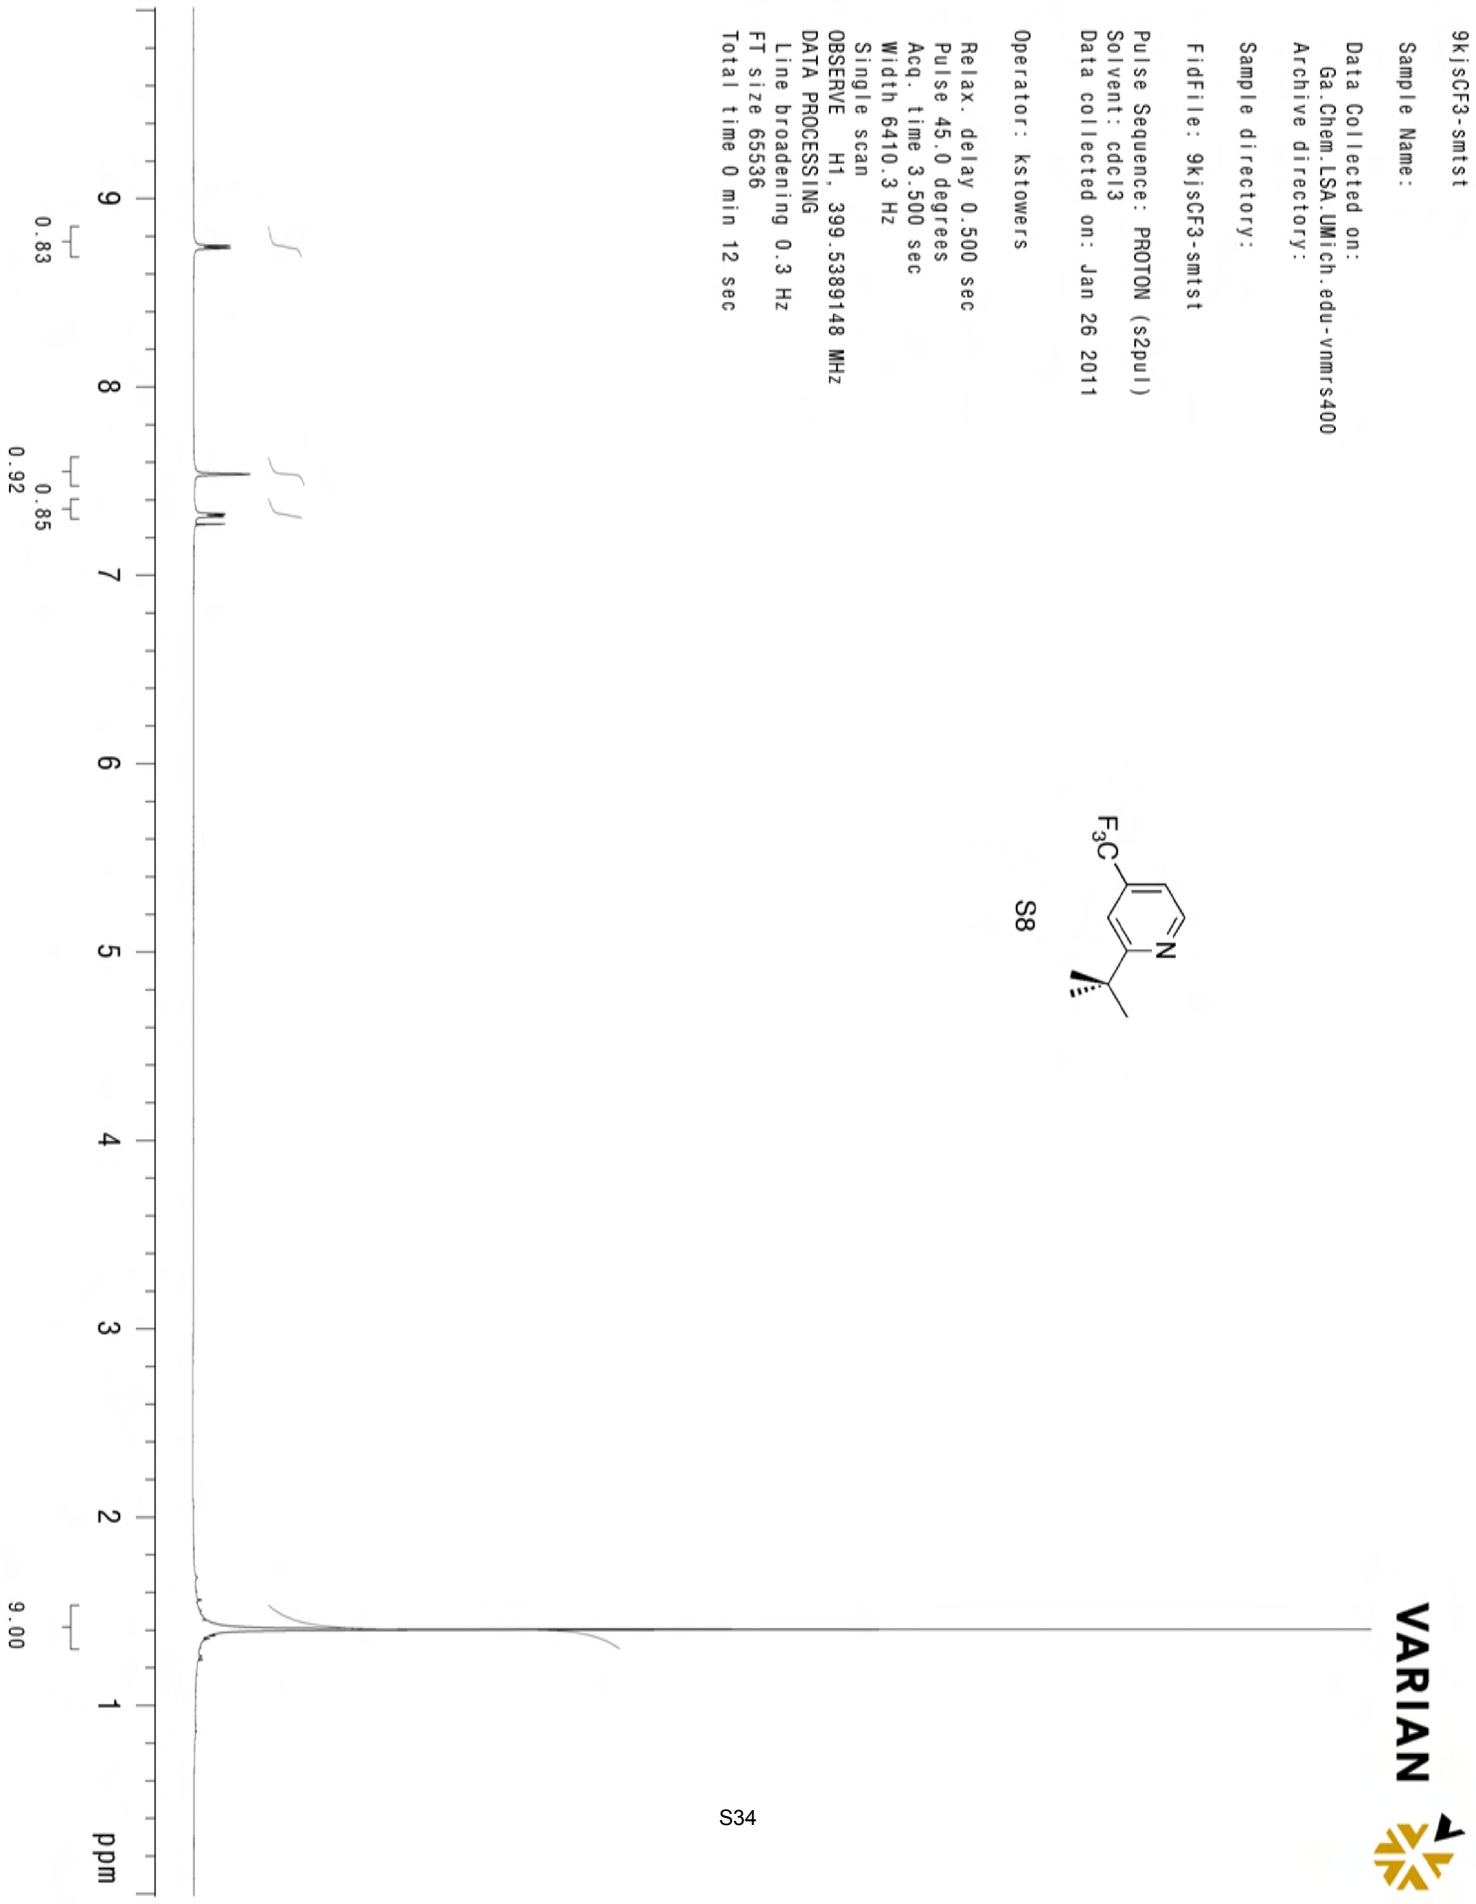

STANDARD CARBON PARAMETERS

Sample Name :

Data Collected on :  
Ga. Chem. USA. UMICH.edu -vnmrs400  
Archive directory:

Sample directory:

Fidfile: carbon

Pulse Sequence: CARBON (szpu1)  
Solvent: cdcl3  
Data collected on: Jan 27 2011

Temp. 31.0 C / 304.1 K  
Operator: kstowers

Relax. delay 0.100 sec  
Pulse 45.0 degrees  
Acq. time 2.569 sec  
Width 25510.2 Hz  
10000 repetitions  
OBSERVE C13, 100.4641107 MHz  
DECOUPLE H1, 399.5409236 MHz  
Power 35 dB  
continuously on  
WALTZ-16 modulated  
DATA PROCESSING  
Line broadening 1.0 Hz  
FT size 131072  
Total time 7 hr, 26 min

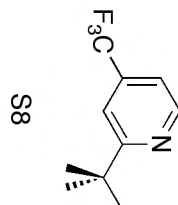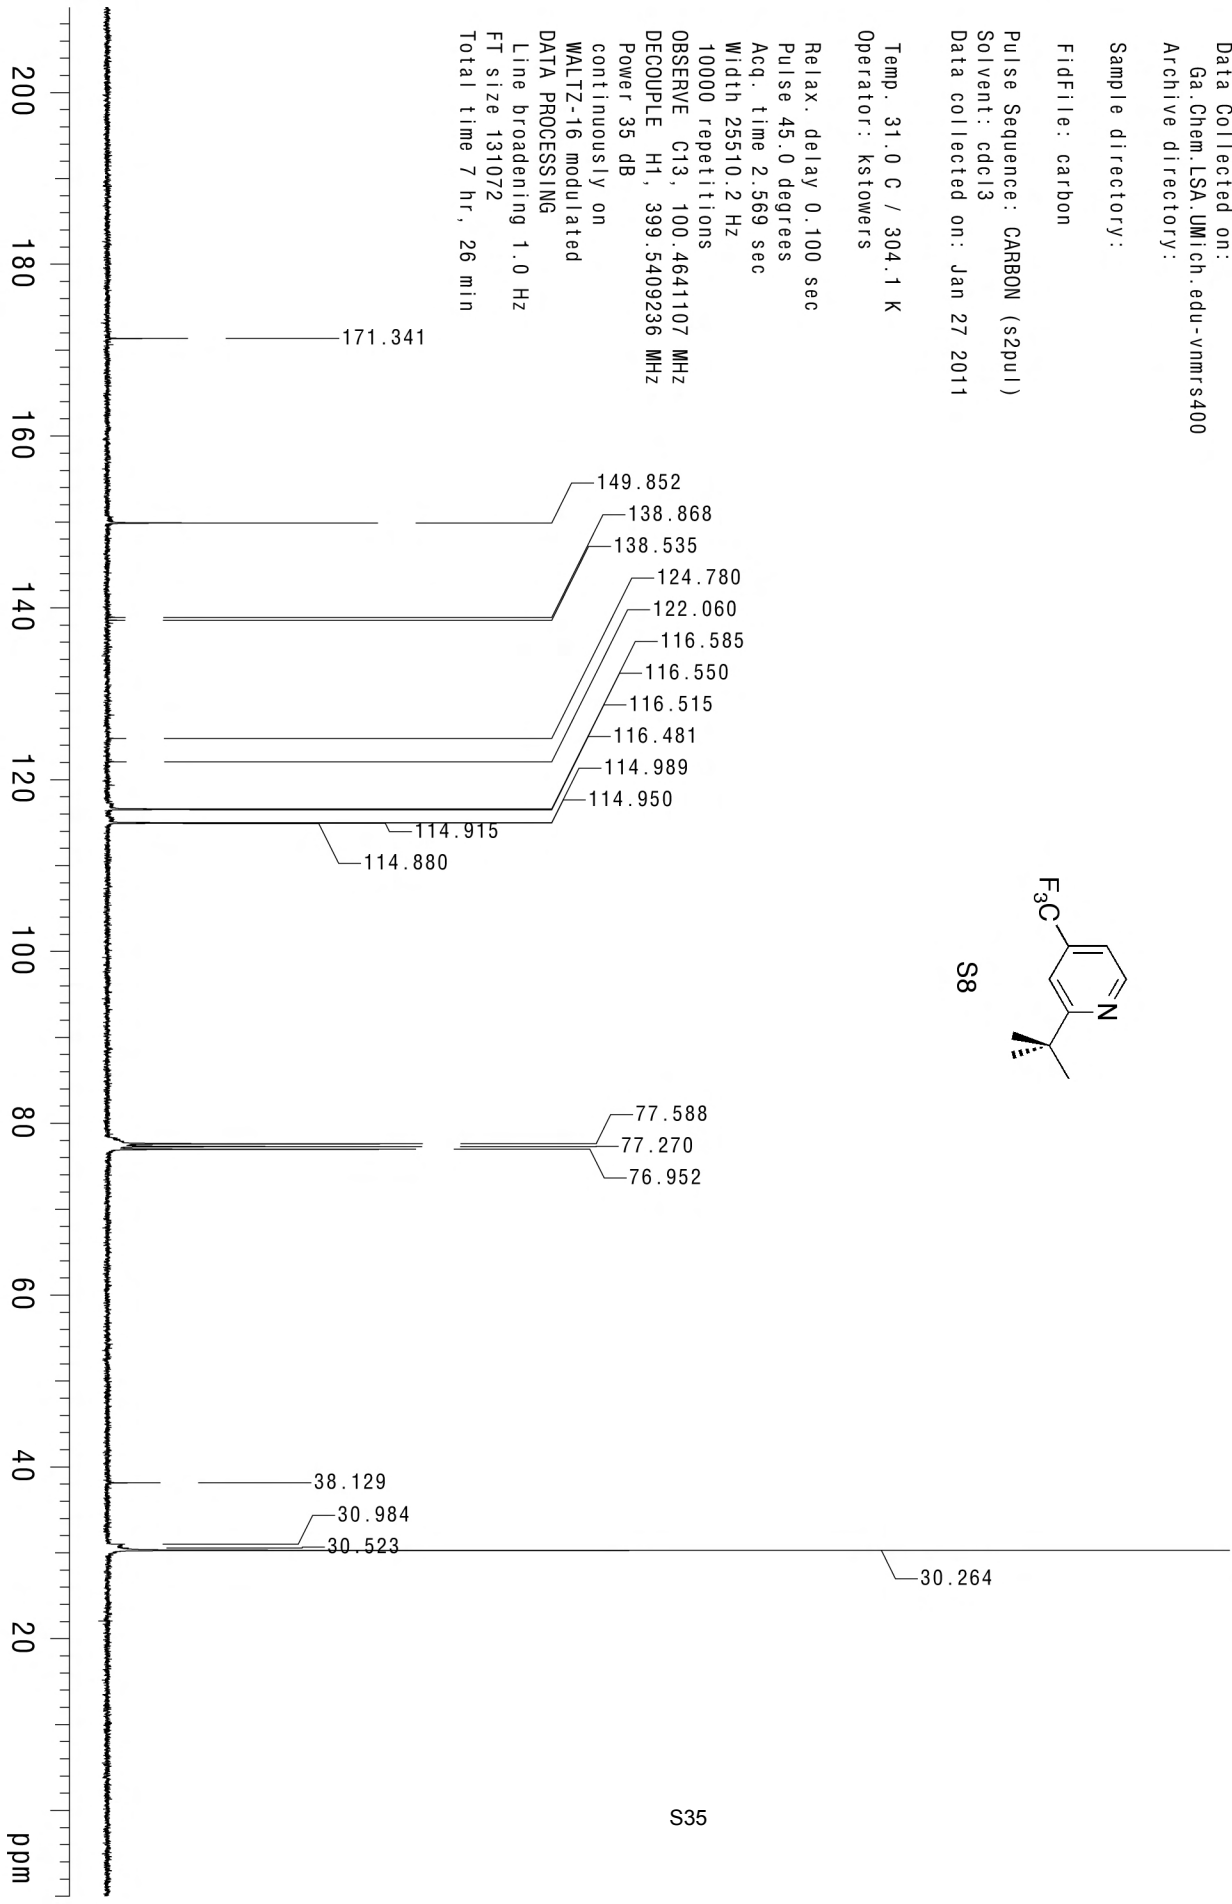

Sample Name :

Data Collected on :  
Co. Chem. USA. UMich .edu -vnmrs400  
Archive directory :

Sample directory :

Fidfile : 9kjsCF3sm-F

Pulse Sequence : FLUORINE (s2pul)  
Solvent : cdcl3  
Data collected on : Jan 13 2011Temp. 45.0 C / 318.1 K  
Operator : kstowersRelax. delay 1.000 sec  
Pulse 30.0 degrees  
Acq. time 0.734 sec  
Width 89285.7 Hz  
16 repetitions  
OBSERVE F19, 376.8659339 MHz  
DATA PROCESSING  
Line broadening 1.5 Hz  
FT size 131072  
Total time 0 min 31 sec

64.839

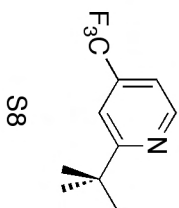



9kjsomethylsm

Sample Name :

Data Collected on :  
Ga.Chem.LSA.UMich.edu-vnmrs400  
Archive directory:

Sample directory:

Fidfile: 9kjsomethylsm

Pulse Sequence: PROTON (szpu1)  
Solvent: cdcl3  
Data collected on: Jan 13 2011

Temp. 44.0 C / 317.1 K  
Operator: kstowers

Relax. delay 0.500 sec  
Pulse 45.0 degrees  
Acq. time 3.500 sec  
Width 6410.3 Hz  
8 repetitions  
OBSERVE H1, 399.5389140 MHz  
DATA PROCESSING  
Line broadening 0.3 Hz  
FT size 65536  
Total time 0 min 40 sec

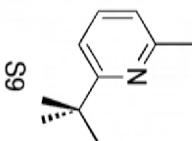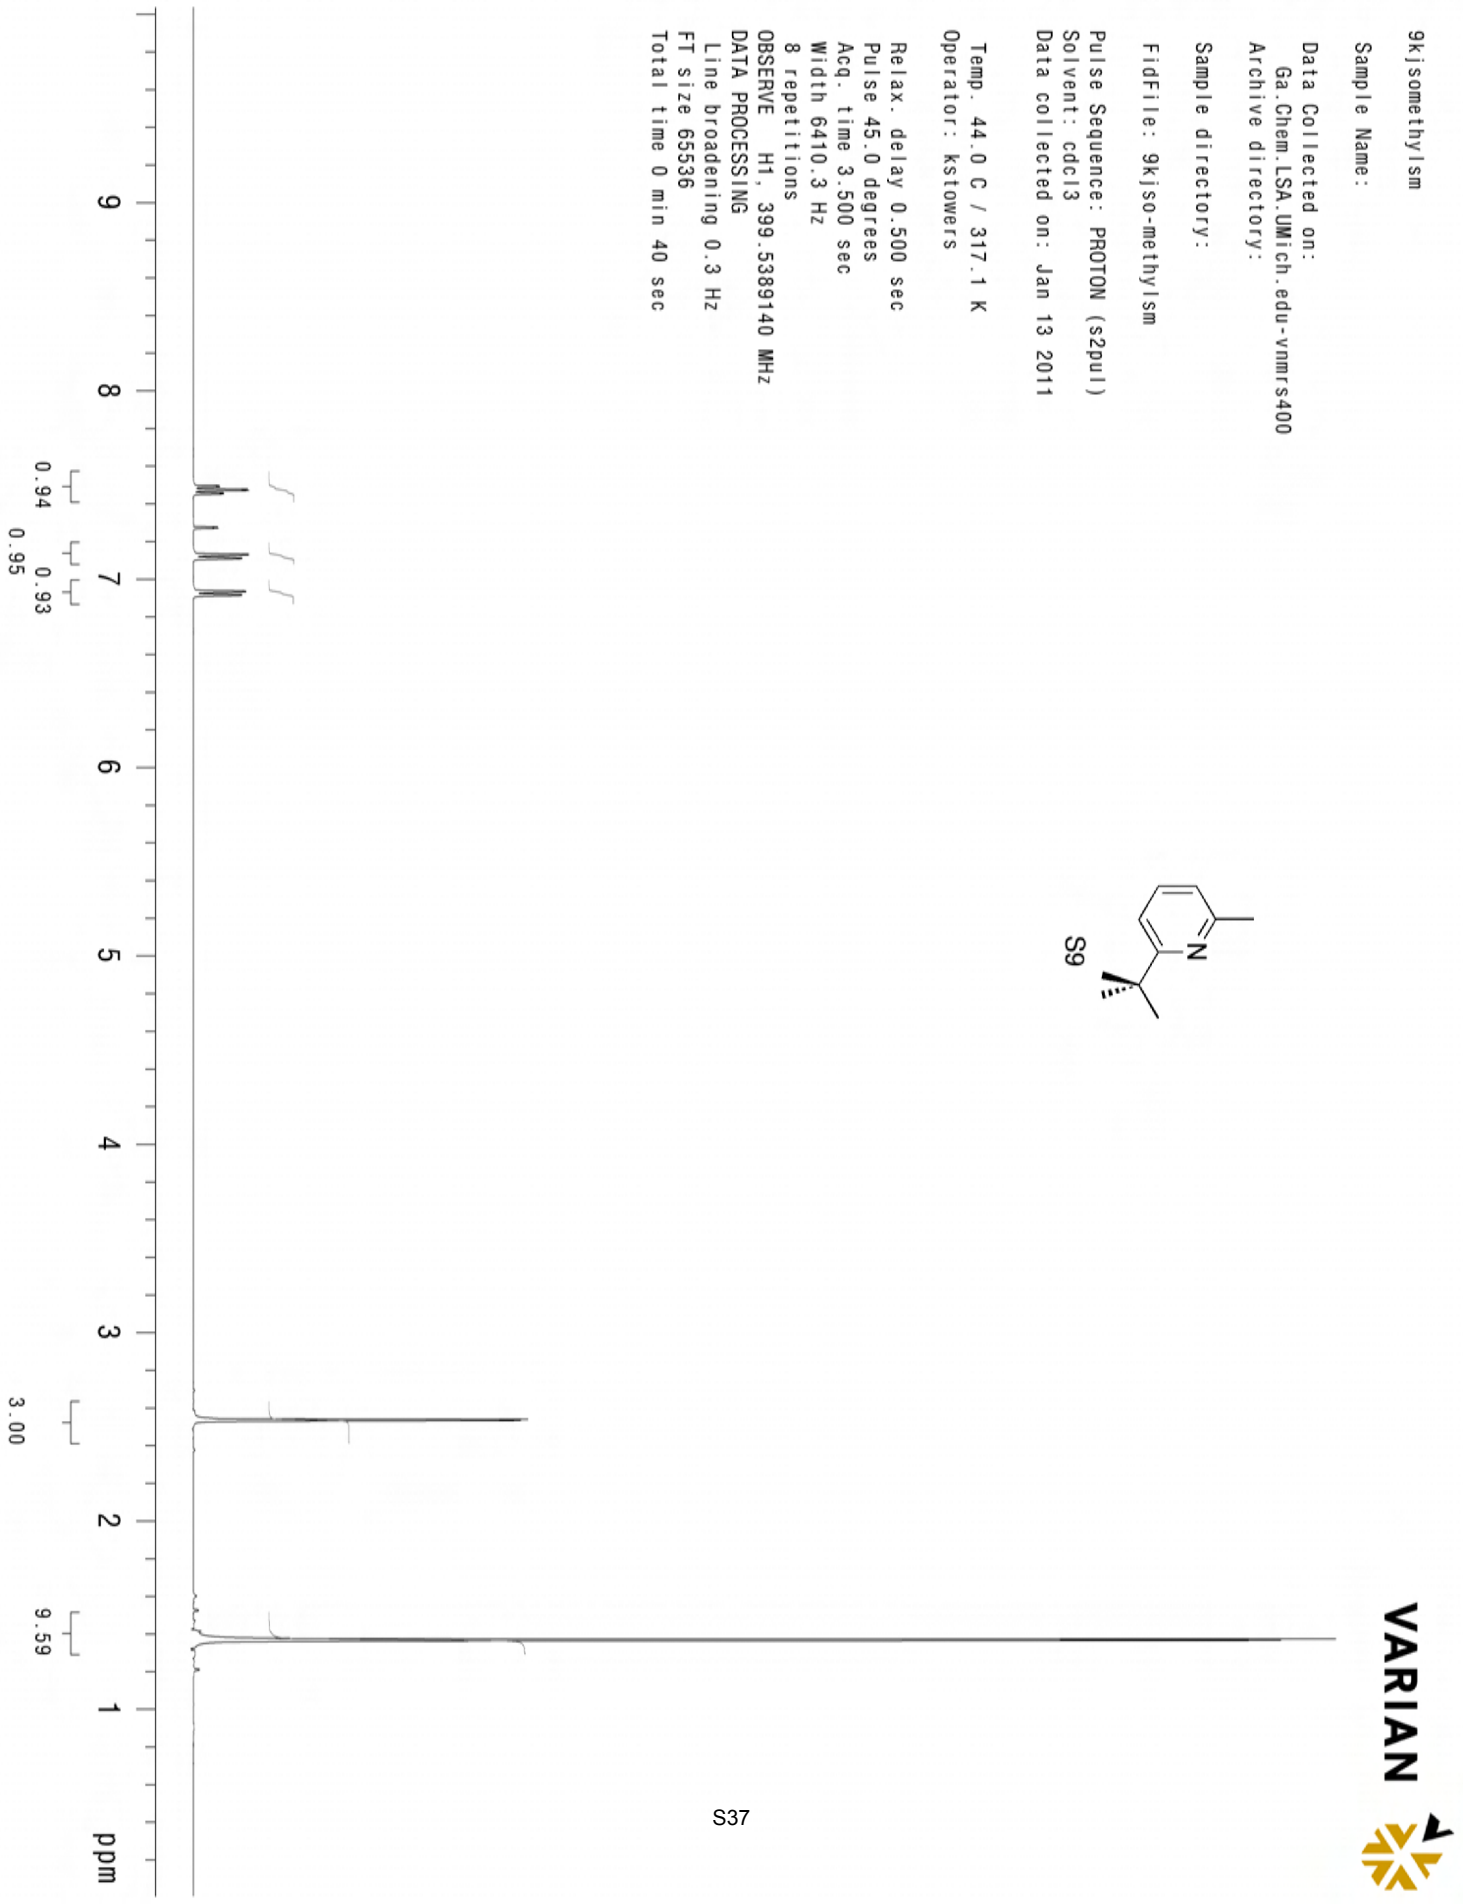

Sample Name :

Data Collected on :  
Ga. Chem. LSA.UMich.edu-vnmrs400  
Archive directory :

Sample directory :

Fidfile : 9kjs-o-MeC

Pulse Sequence: CARBON (szpul)  
Solvent: cdcl3  
Data collected on: Jan 18 2011

Operator: kstowers

Relax. delay 0.100 sec  
Pulse 45.0 degrees  
Acq. time 2.569 sec  
Width 25510.2 Hz  
816 repetitions  
OBSERVE C13, 100.4641194 MHz  
DECOUPLE H1, 399.5409236 MHz  
Power 35 dB  
continuously on  
WALTZ-16 modulated  
DATA PROCESSING  
Line broadening 1.0 Hz  
FT size 131072  
Total time 36 min

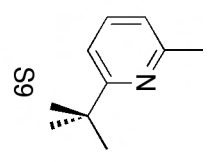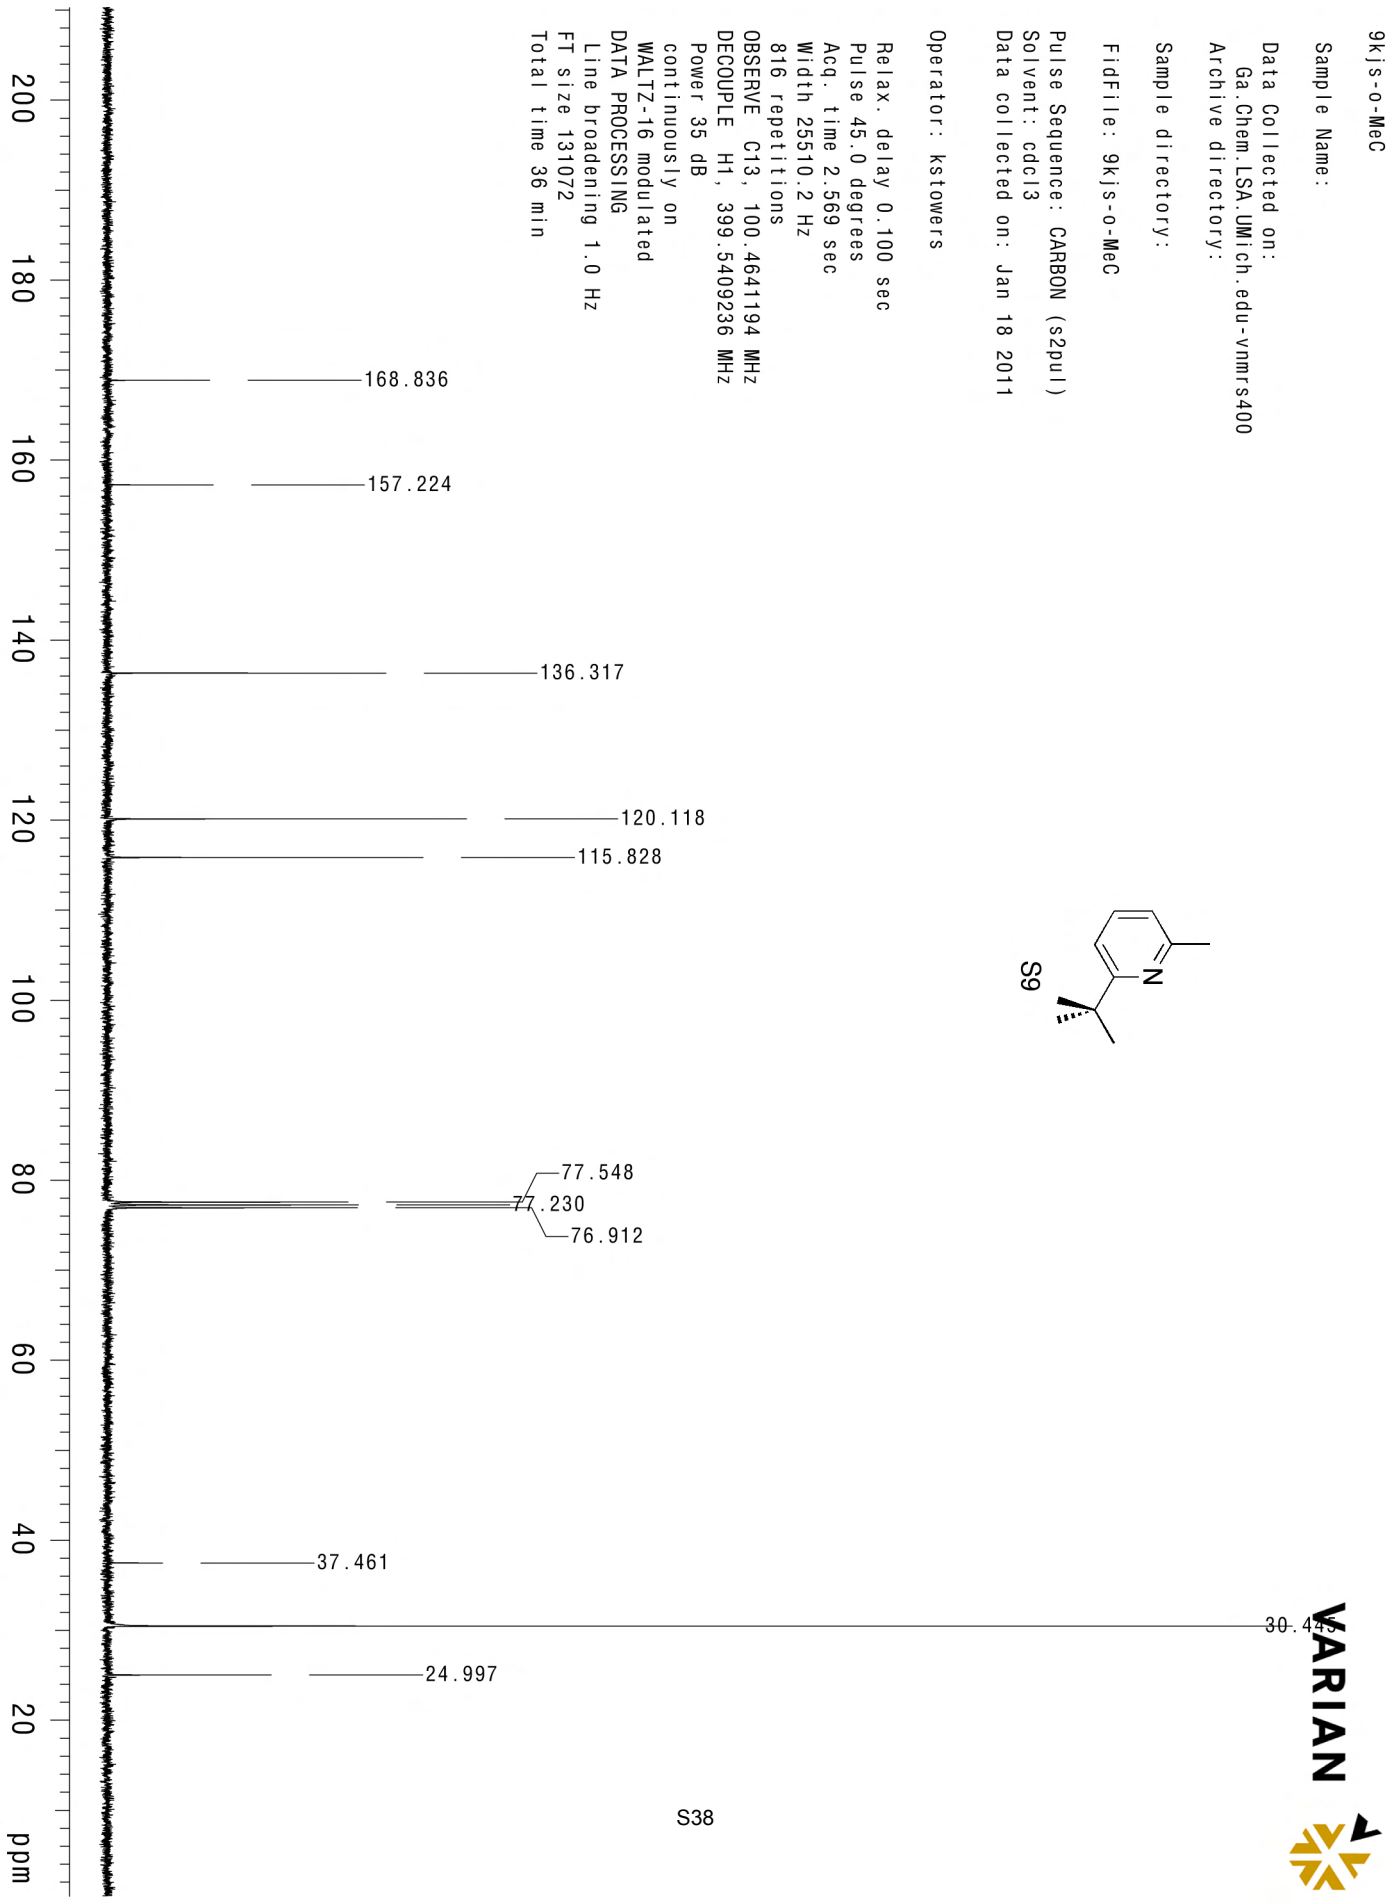

Sample Name :

Data Collected on :  
Ga. Chem. USA. UMICH .edu -vnmrs400  
Archive directory :

Sample directory :

Fidfile : 9kjs63-1H

Pulse Sequence : PROTON (s2pu1)

Solvent : cdcl3

Data collected on : Feb 4 2011

Operator : kstowers

Relax. delay 0.500 sec

Pulse 45.0 degrees

Acq. time 3.500 sec

Width 6410.3 Hz

16 repetitions

OBSERVE H1, 399.5389162 MHz

DATA PROCESSING

Line broadening 0.3 Hz

FT size 65536

Total time 1 min 12 sec

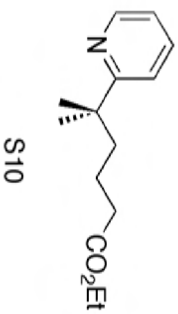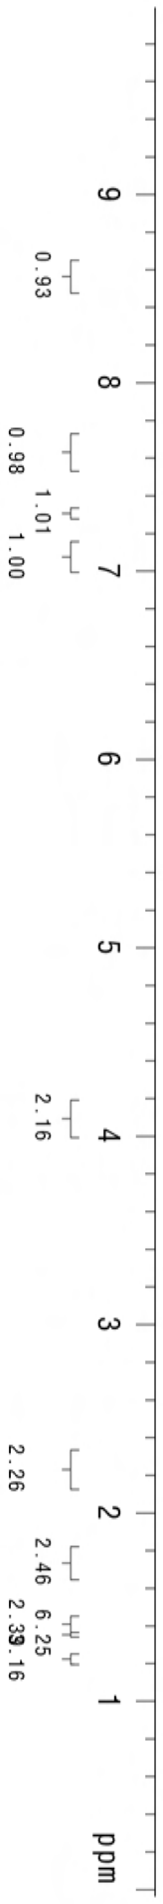

Sample Name :

Data Collected on :  
 Ga. Chem. USA. UMICH .edu -vnmr400  
 Archive directory:

Sample directory :

Fidfile : 9kjs63-13C

Pulse Sequence : CARBON (szpu1)  
 Solvent : cdcl3  
 Data collected on : Feb 4 2011

Operator : kstowers

Relax. delay 0.100 sec  
 Pulse 45.0 degrees  
 Acq. time 2.569 sec  
 Width 25510.2 Hz  
 1360 repetitions  
 OBSERVE C13, 100.4641186 MHz  
 DECOUPLE H1, 399.5409236 MHz  
 Power 35 dB  
 continuously on  
 WALTZ-16 modulated  
 DATA PROCESSING  
 Line broadening 1.0 Hz  
 FT size 131072  
 Total time 1 hr, 12 min

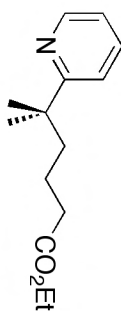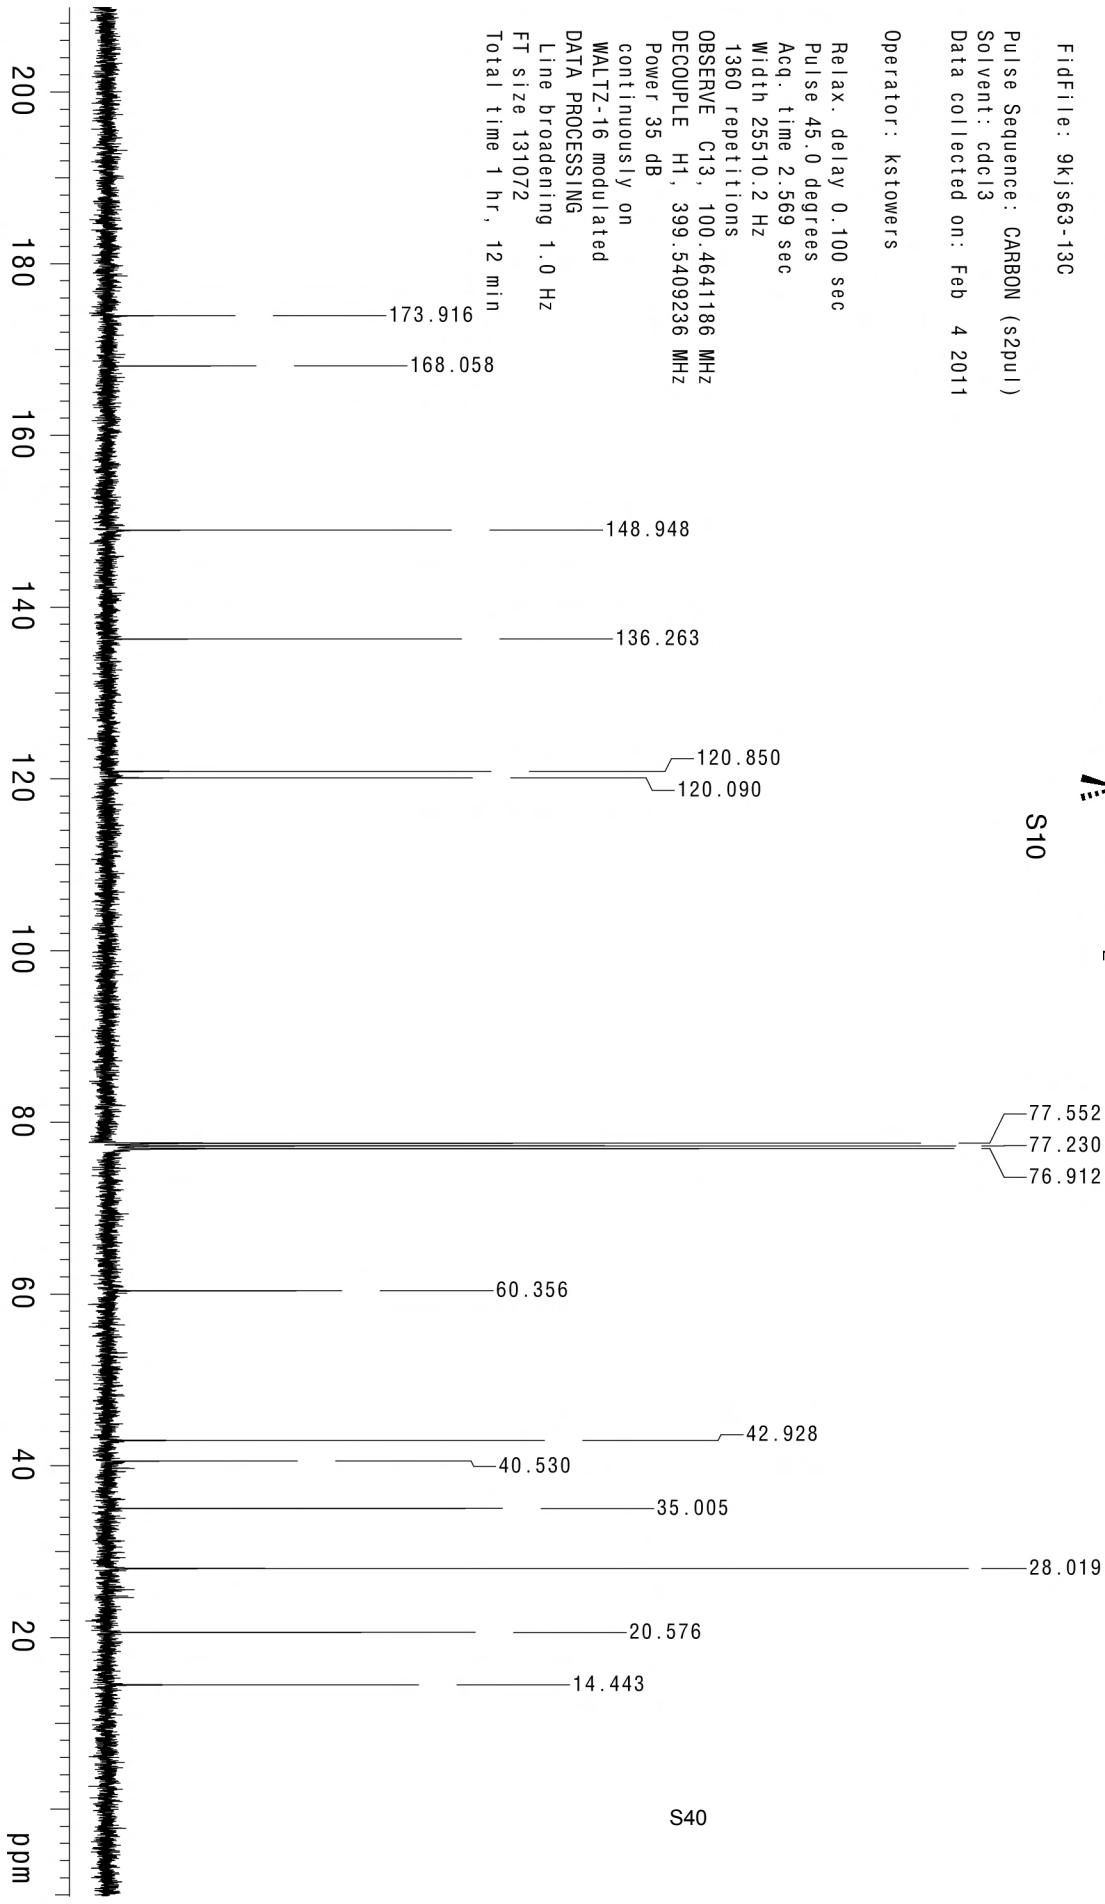

8k1s190-1

Sample Name :

Data Collected on:  
Co. Chem. LSA. Umich. edu - vnmr-s400  
Archive directory:

Sample directory:

Fidfile: 8k1s190-1

Pulse Sequence: PROTON (szpu1)  
Solvent: cdcl3  
Data collected on: Dec 9 2010

Operator: kstowers

Relax. delay 0.500 sec  
Pulse 45.0 degrees  
Acq. time 3.500 sec  
Width 6410.3 Hz  
16 repetitions  
OBSERVE H1, 400.5206278 MHz  
DATA PROCESSING  
Line broadening 0.3 Hz  
FT size 65536  
Total time 1 min 12 sec

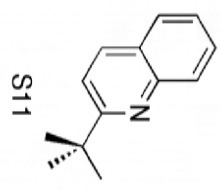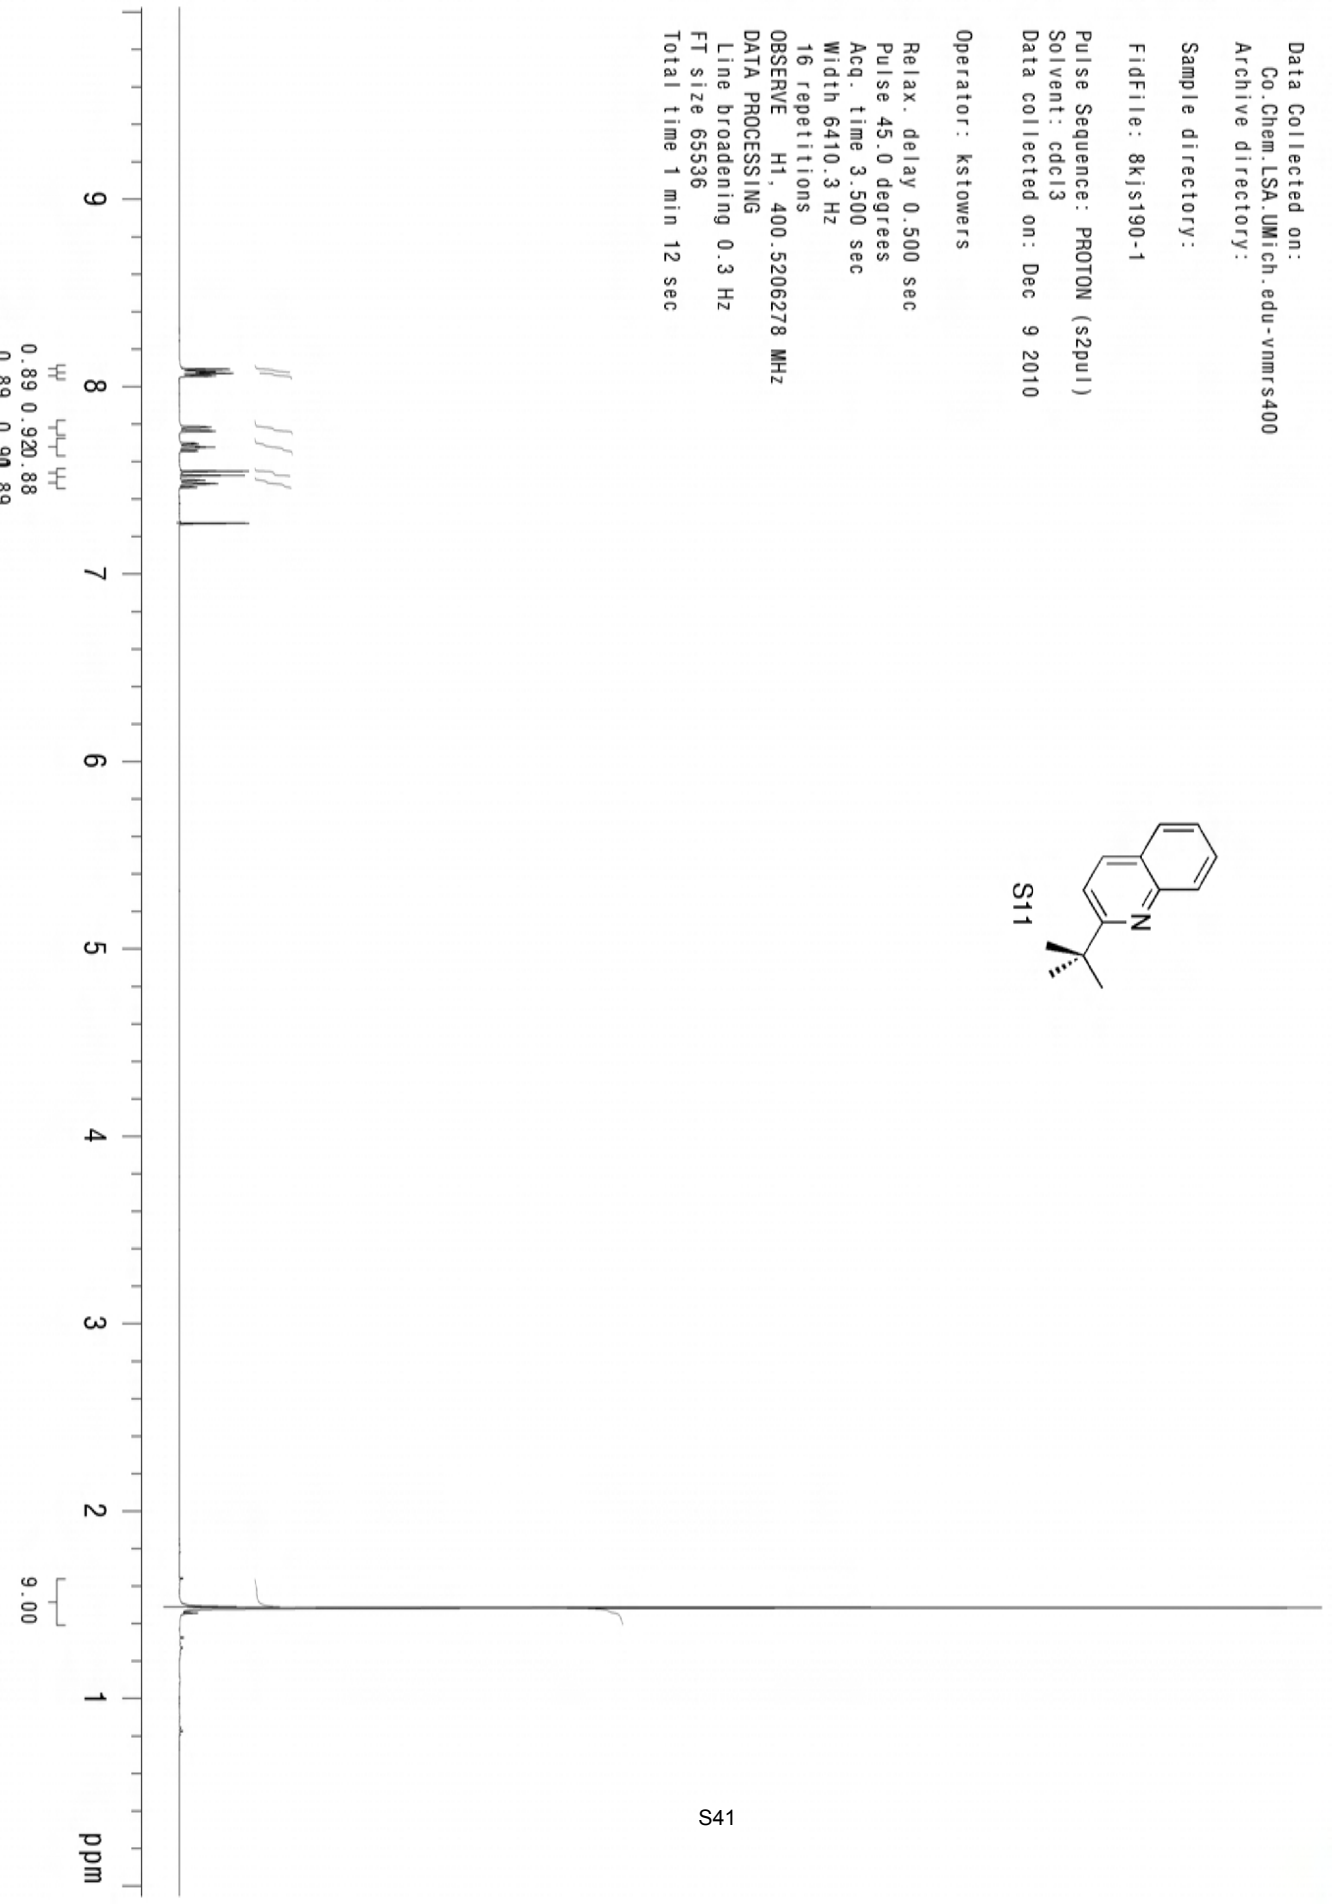

Sample Name:

Data Collected on:  
Ga. Chem. USA. UMICH.edu-vmrms400  
Archive directory:

Sample directory:

Fidfile: 9kjs90-tBuQuinc13

Pulse Sequence: CARBON (szpu1)  
Solvent: cdcl3  
Data collected on: Mar 8 2011

Operator: kstowers

Relax. delay 0.100 sec  
Pulse 45.0 degrees  
Acq. time 2.569 sec  
Width 25510.2 Hz496 repetitions  
OBSERVE C13, 100.4641209 MHz  
DECOUPLE H1, 399.5409236 MHz  
Power 35 dB  
continuously on  
WALTZ-16 modulated  
DATA PROCESSING  
Line broadening 1.0 Hz  
FT size 131072  
Total time 22 min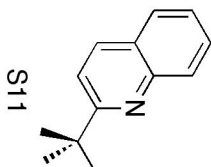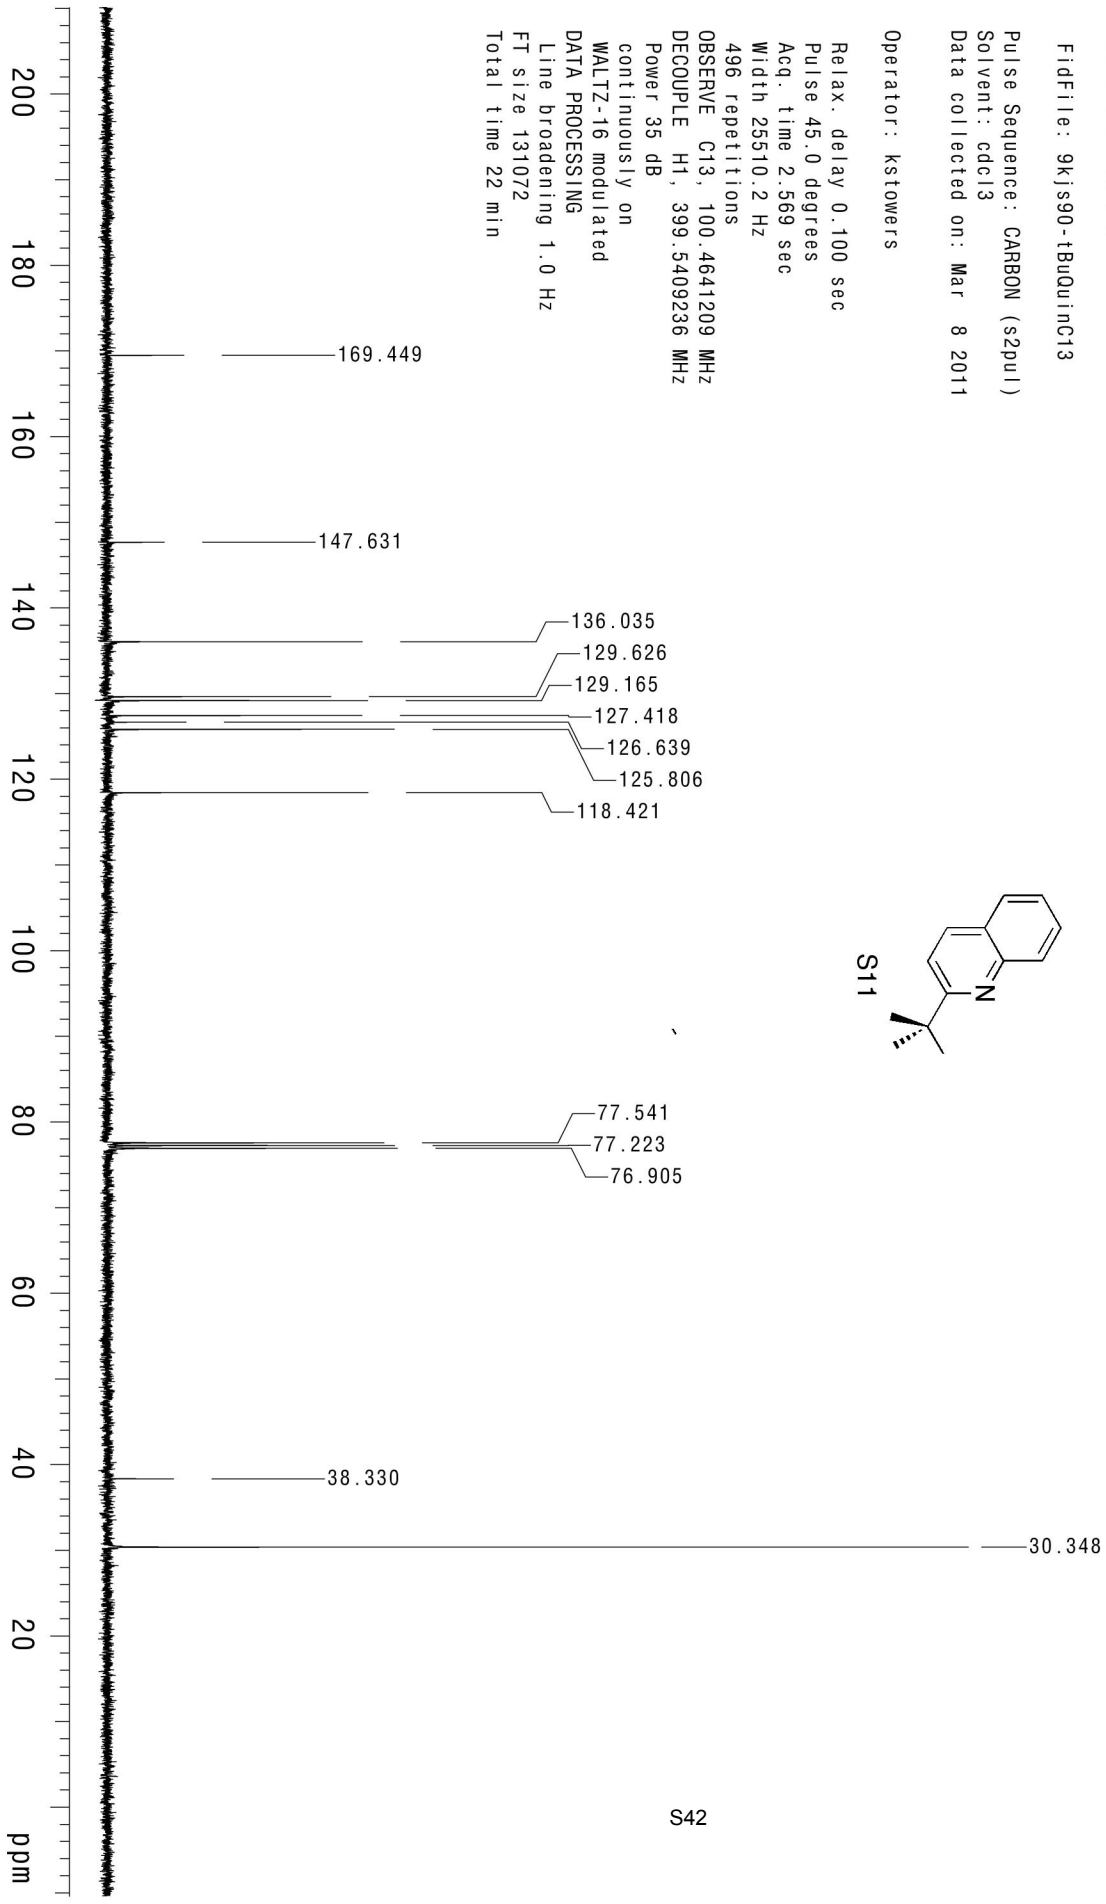

9kjs-tBuHeckH

Sample Name :

Data Collected on :  
Ga.Chem.LSA.UMich.edu-vnmrs400  
Archive directory:

Sample directory:

Fidfile: 9kjs-tBuHeckH

Pulse Sequence: PROTON (szpu1)  
Solvent: cdcl3  
Data collected on: Jan 18 2011

Operator: kstowers

Relax. delay 0.500 sec  
Pulse 45.0 degrees  
Acq. time 3.500 sec  
Width 6410.3 Hz  
16 repetitions  
OBSERVE H1, 399.5389157 MHz  
DATA PROCESSING  
Line broadening 0.3 Hz  
FT size 65536  
Total time 1 min 12 sec

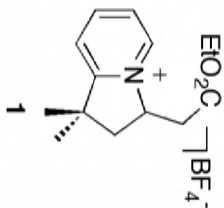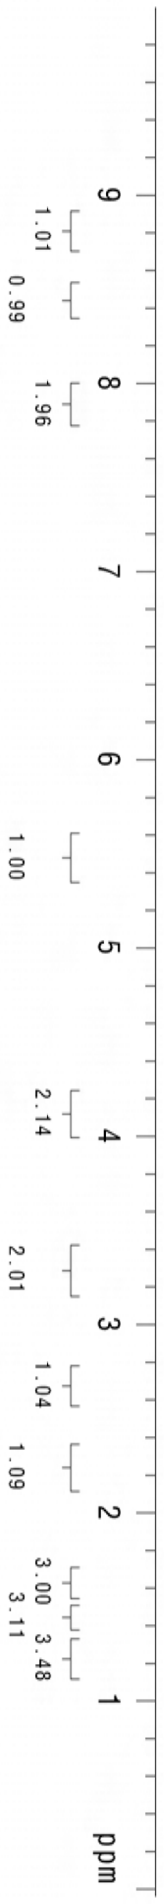

Sample Name :

Data Collected on:  
 Ga. Chem. USA. UMICH .edu -vnmr400  
 Archive directory:

Sample directory :

Fidfile : 9kjs72-C

Pulse Sequence: CARBON (szpu1)  
 Solvent: cdcl3  
 Data collected on: Mar 2 2011

Operator : kstowers

Relax. delay 0.100 sec  
 Pulse 45.0 degrees  
 Acq. time 2.569 sec  
 Width 25510.2 Hz

1072 repetitions  
 OBSERVE C13, 100.4641199 MHz  
 DECOUPLE H1, 399.5409236 MHz  
 Power 35 dB  
 continuously on  
 WALTZ-16 modulated  
 DATA PROCESSING  
 Line broadening 1.0 Hz  
 FT size 131072  
 Total time 47 min

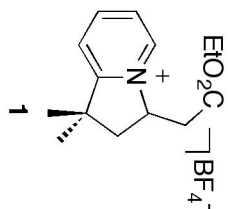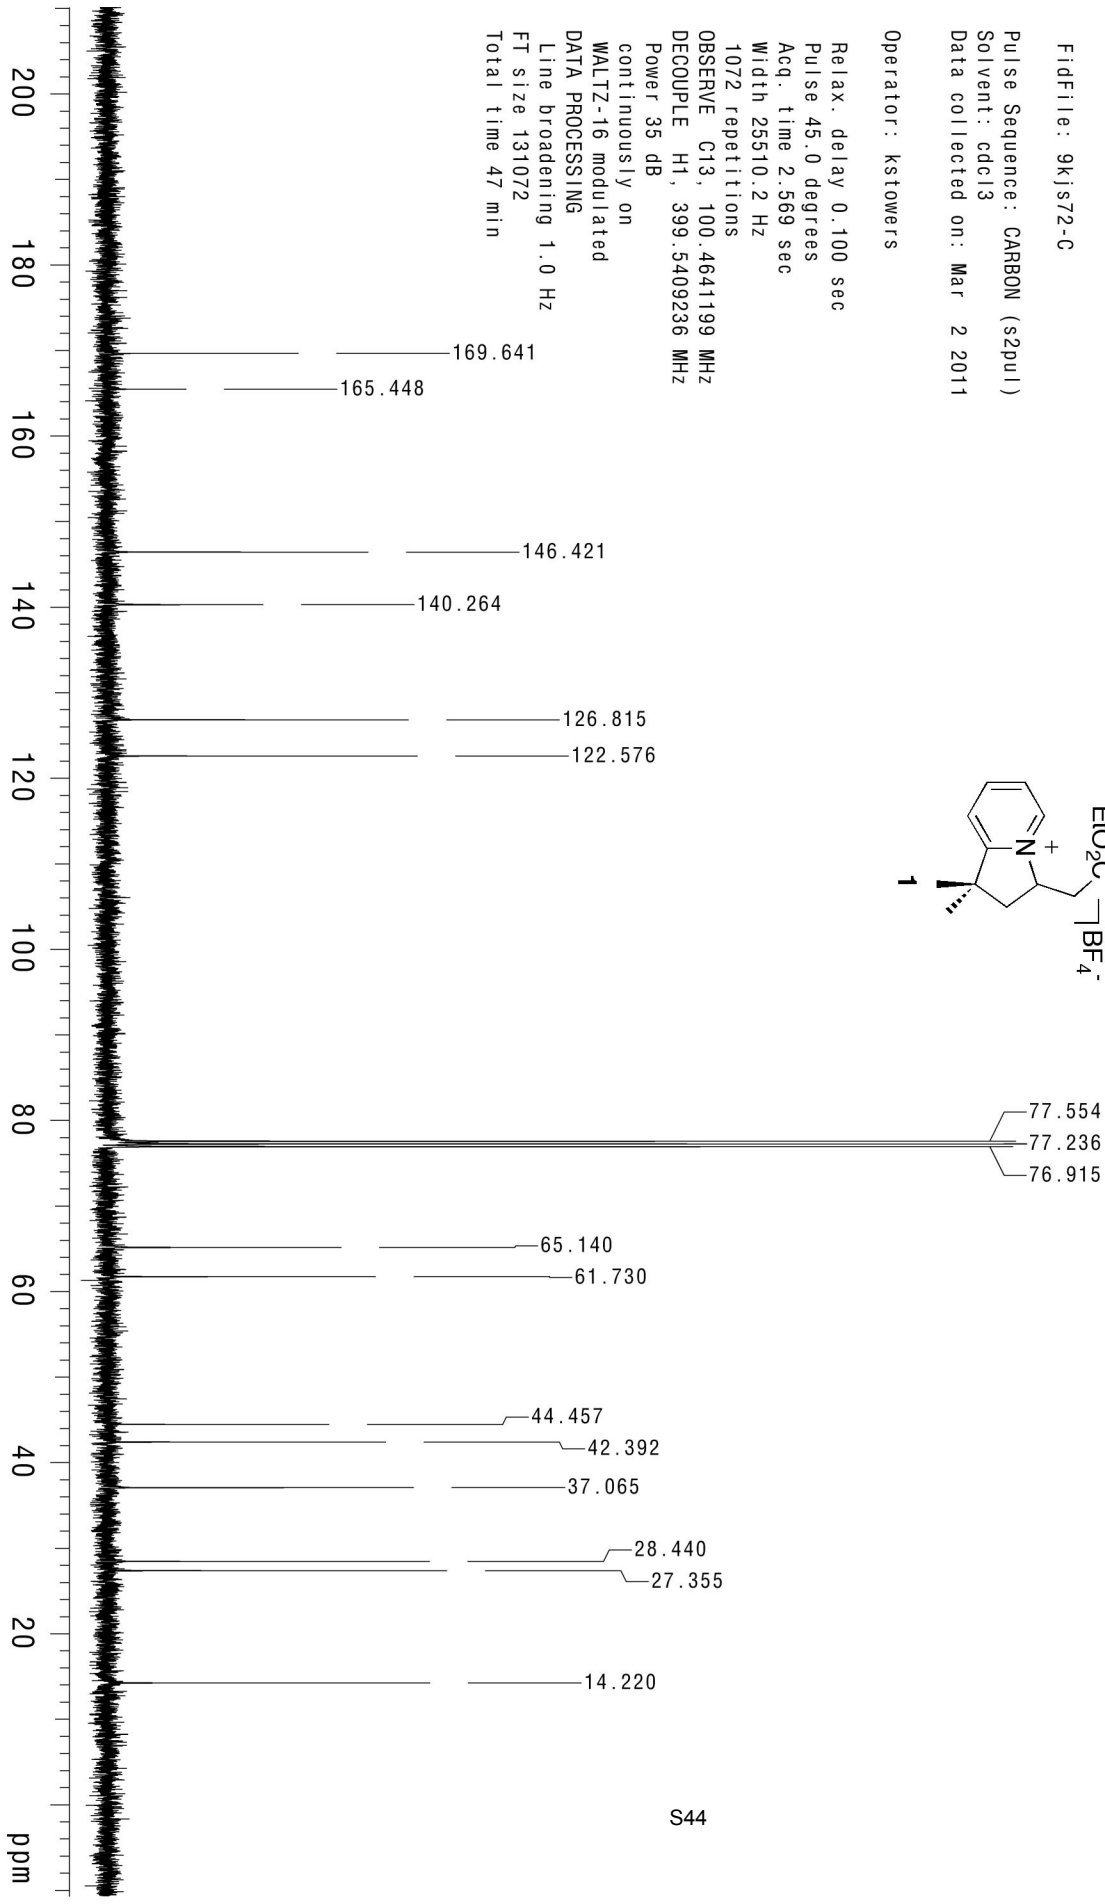



Sample Name :

Data Collected on :  
Co. Chem. USA. UMICH.edu-vnmrs400  
Archive directory :

Sample directory :

Fidfile : 9kjs-tBuHeckF

Pulse Sequence : FLUORINE (s2pul1)

Solvent : cdcl3

Data collected on : Jan 18 2011

Operator : kstowers

Relax. delay 1.000 sec  
Pulse 30.0 degrees  
Acq. time 0.734 sec  
Width 89285.7 Hz  
16 repetitions  
OBSERVE F19, 376.8659339 MHz  
DATA PROCESSING  
Line broadening 1.5 Hz  
FT size 131072  
Total time 0 min 31 sec

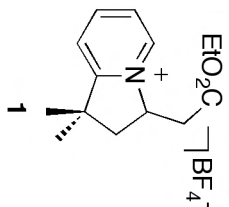

-152.150

-152.204

20 0 -20 -40 -60 -80 -100 -120 -140 -160 -180 ppm

Sample Name :

Data Collected on:  
Co. Chem. USA: UMich.edu-vnmrs400  
Archive directory:

Sample directory:

Fidfile: 9kjs78-3

Pulse Sequence: PROTON (szpul)  
Solvent: cdcl3  
Data collected on: Mar 3 2011

Temp. 25.0 C / 298.1 K  
Operator: kstowers

Relax. delay 0.500 sec  
Pulse 45.0 degrees  
Acq. time 3.500 sec  
Width 6410.3 Hz  
16 repetitions  
OBSERVE H1, 400.5206315 MHz  
DATA PROCESSING  
Line broadening 0.3 Hz  
FT size 65536  
Total time 1 min 12 sec

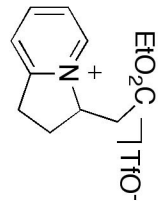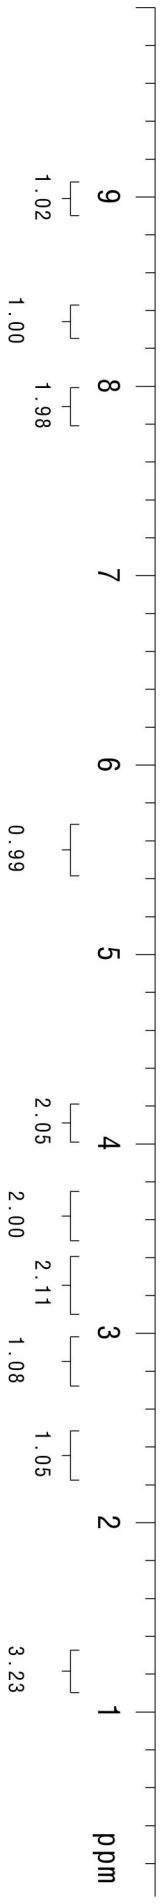

Sample Name :

Data Collected on :  
Ga. Chem. USA. UMich. edu- vnmr-s400  
Archive directory :

Sample directory :

Fidfile: 9kj552-4C

Pulse Sequence: CARBON (szpul)  
Solvent: cdcl3  
Data collected on: Feb 9 2011

Temp. 31.0 C / 304.1 K  
Operator: kstowers

Relax. delay 0.100 sec  
Pulse 45.0 degrees  
Acq. time 2.569 sec  
Width 25510.2 Hz  
848 repetitions  
OBSERVE C13, 100.4641252 MHz  
DECOUPLE H1, 399.5409236 MHz  
Power 35 dB  
continuously on  
WALTZ-16 modulated  
DATA PROCESSING  
Line broadening 1.0 Hz  
FT size 131072  
Total time 37 min

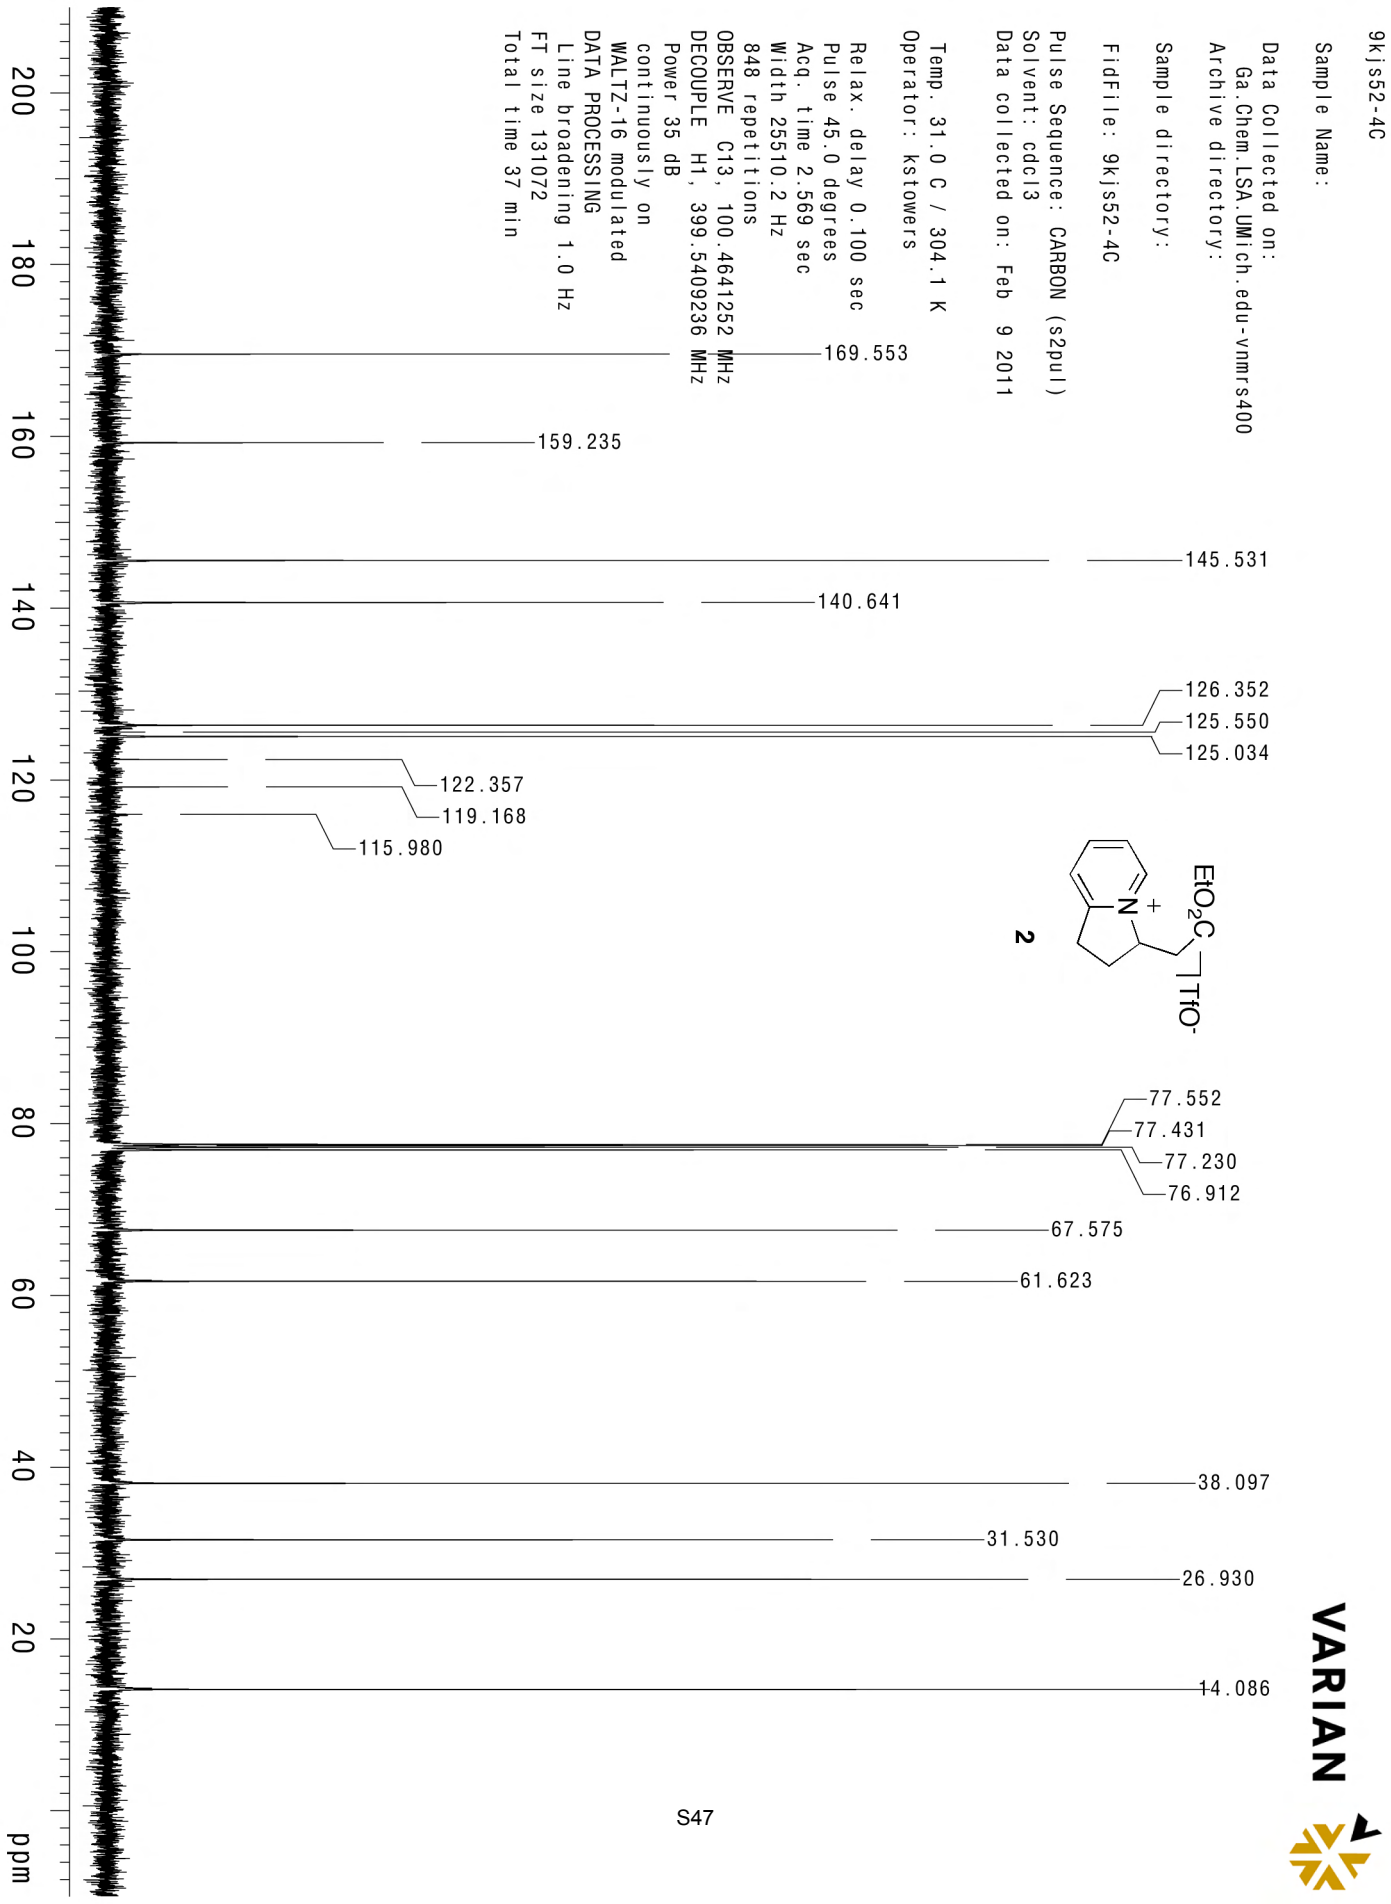

Sample Name :

Data Collected on:  
Co. Chem. USA. UMich. edu - vnmrs400  
Archive directory:

Sample directory:

Fidfile: 9kjs47-F

Pulse Sequence: FLUORINE (s2pul)  
Solvent: cdcl3  
Data collected on: Feb 1 2011

Temp. 25.0 C / 298.1 K  
Operator: kstowers

Relax. delay 1.000 sec  
Pulse 30.0 degrees  
Acq. time 0.734 sec  
Width 89285.7 Hz  
16 repetitions  
OBSERVE F19, 376.8659339 MHz  
DATA PROCESSING  
Line broadening 1.5 Hz  
FT size 131072  
Total time 0 min 31 sec

78.432

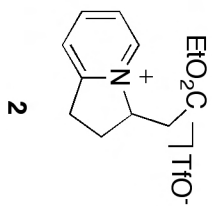

Sample Name :

Data Collected on:  
Co. Chem. USA. Umich. edu - vnmr400  
Archive directory:

Sample directory:

Fidfile: 9kjs-1pr-1

Pulse Sequence: PROTON (szpu1)  
Solvent: cdcl3  
Data collected on: Jan 25 2011

Temp. 25.0 C / 298.1 K  
Operator: kstowers

Relax. delay 0.500 sec  
Pulse 45.0 degrees  
Acq. time 3.500 sec  
Width 6410.3 Hz  
Single scan  
OBSERVE H1, 400.5206436 MHz  
DATA PROCESSING  
Line broadening 0.3 Hz  
FT size 65536  
Total time 0 min 12 sec

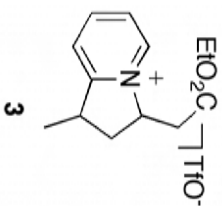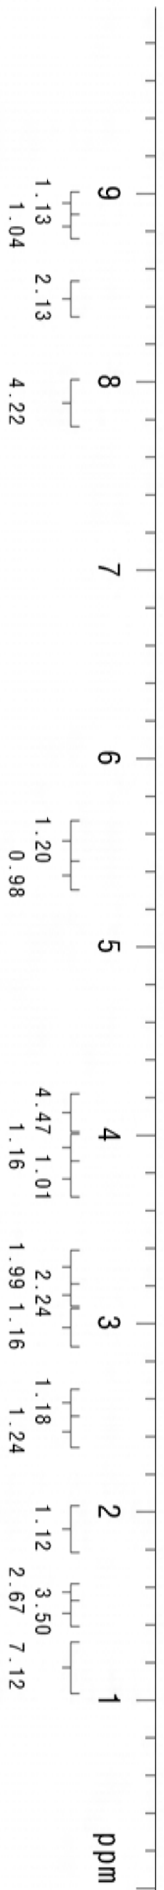

Sample Name :

Data Collected on :  
Co. Chem. USA. UMich. edu - vnmr-s400  
Archive directory :

Sample directory :

Fidfile : 9kjs-47-C

Pulse Sequence : CARBON (szpu1)  
Solvent : cdcl3  
Data collected on : Jan 26 2011

Temp. 25.0 C / 298.1 K  
Operator : kstowers

Relax. delay 0.100 sec  
Pulse 45.0 degrees  
Acq. time 2.569 sec  
Width 25510.2 Hz  
1520 repetitions  
OBSERVE C13, 100.7109804 MHz  
DECOUPLE H1, 400.5226414 MHz  
Power 41 dB  
continuously on  
WALTZ-16 modulated  
DATA PROCESSING  
Line broadening 1.0 Hz  
FT size 131072  
Total time 1 hr, 7 min

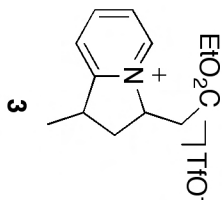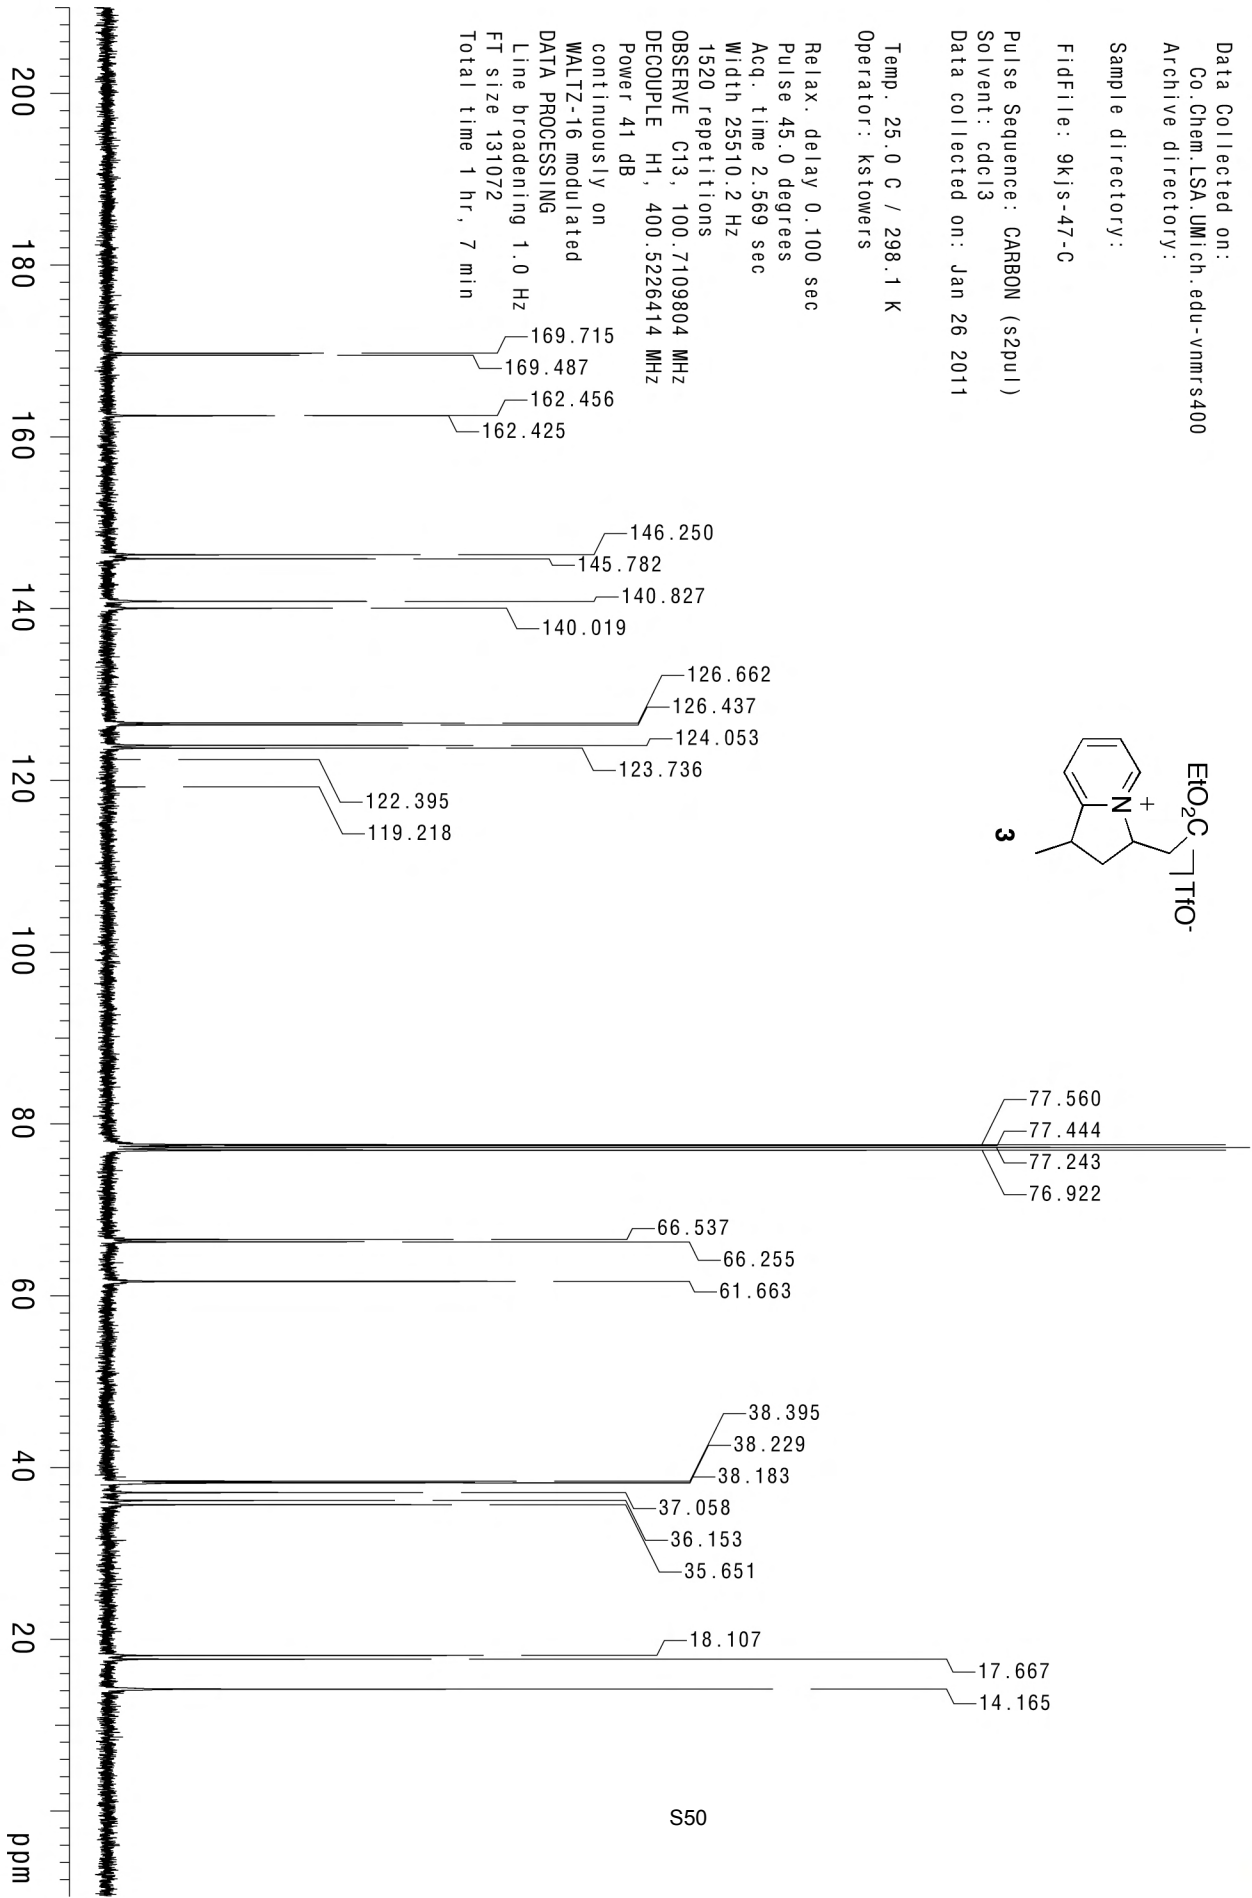

S50

Sample Name :

Data Collected on :  
Co. Chem. USA. UMICH.edu-vnmr-s400  
Archive directory :

Sample directory :

Fidfile: 9kjs47-2f

Pulse Sequence: FLUORINE (s2pul)

Solvent: cdcl3

Data collected on: Jan 29 2011

Temp. 25.0 C / 298.1 K

Operator: kstowers

Relax. delay 1.000 sec

Pulse 30.0 degrees

Acq. time 0.734 sec

Width 89285.7 Hz

16 repetitions

OBSERVE F19, 376.8659339 MHz

DATA PROCESSING

Line broadening 1.5 Hz

FT size 131072

Total time 0 min 31 sec

78.352

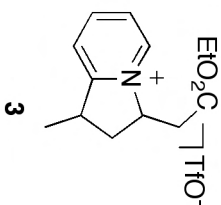

Sample Name :

Data Collected on:  
Ga. Chem. LSA. UMich. edu - vnmr-s400  
Archive directory:

Sample directory:

Fidfile: 9kjs85-1

Pulse Sequence: PROTON (s2pu1)  
Solvent: cdcl3  
Data collected on: Mar 2 2011

Operator: kstowers

Relax. delay 0.500 sec  
Pulse 45.0 degrees  
Acq. time 3.500 sec  
Width 6410.3 Hz  
16 repetitions  
OBSERVE H1, 399.5389198 MHz  
DATA PROCESSING  
Line broadening 0.3 Hz  
FT size 65536  
Total time 1 min 12 sec

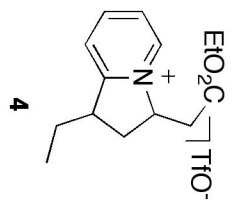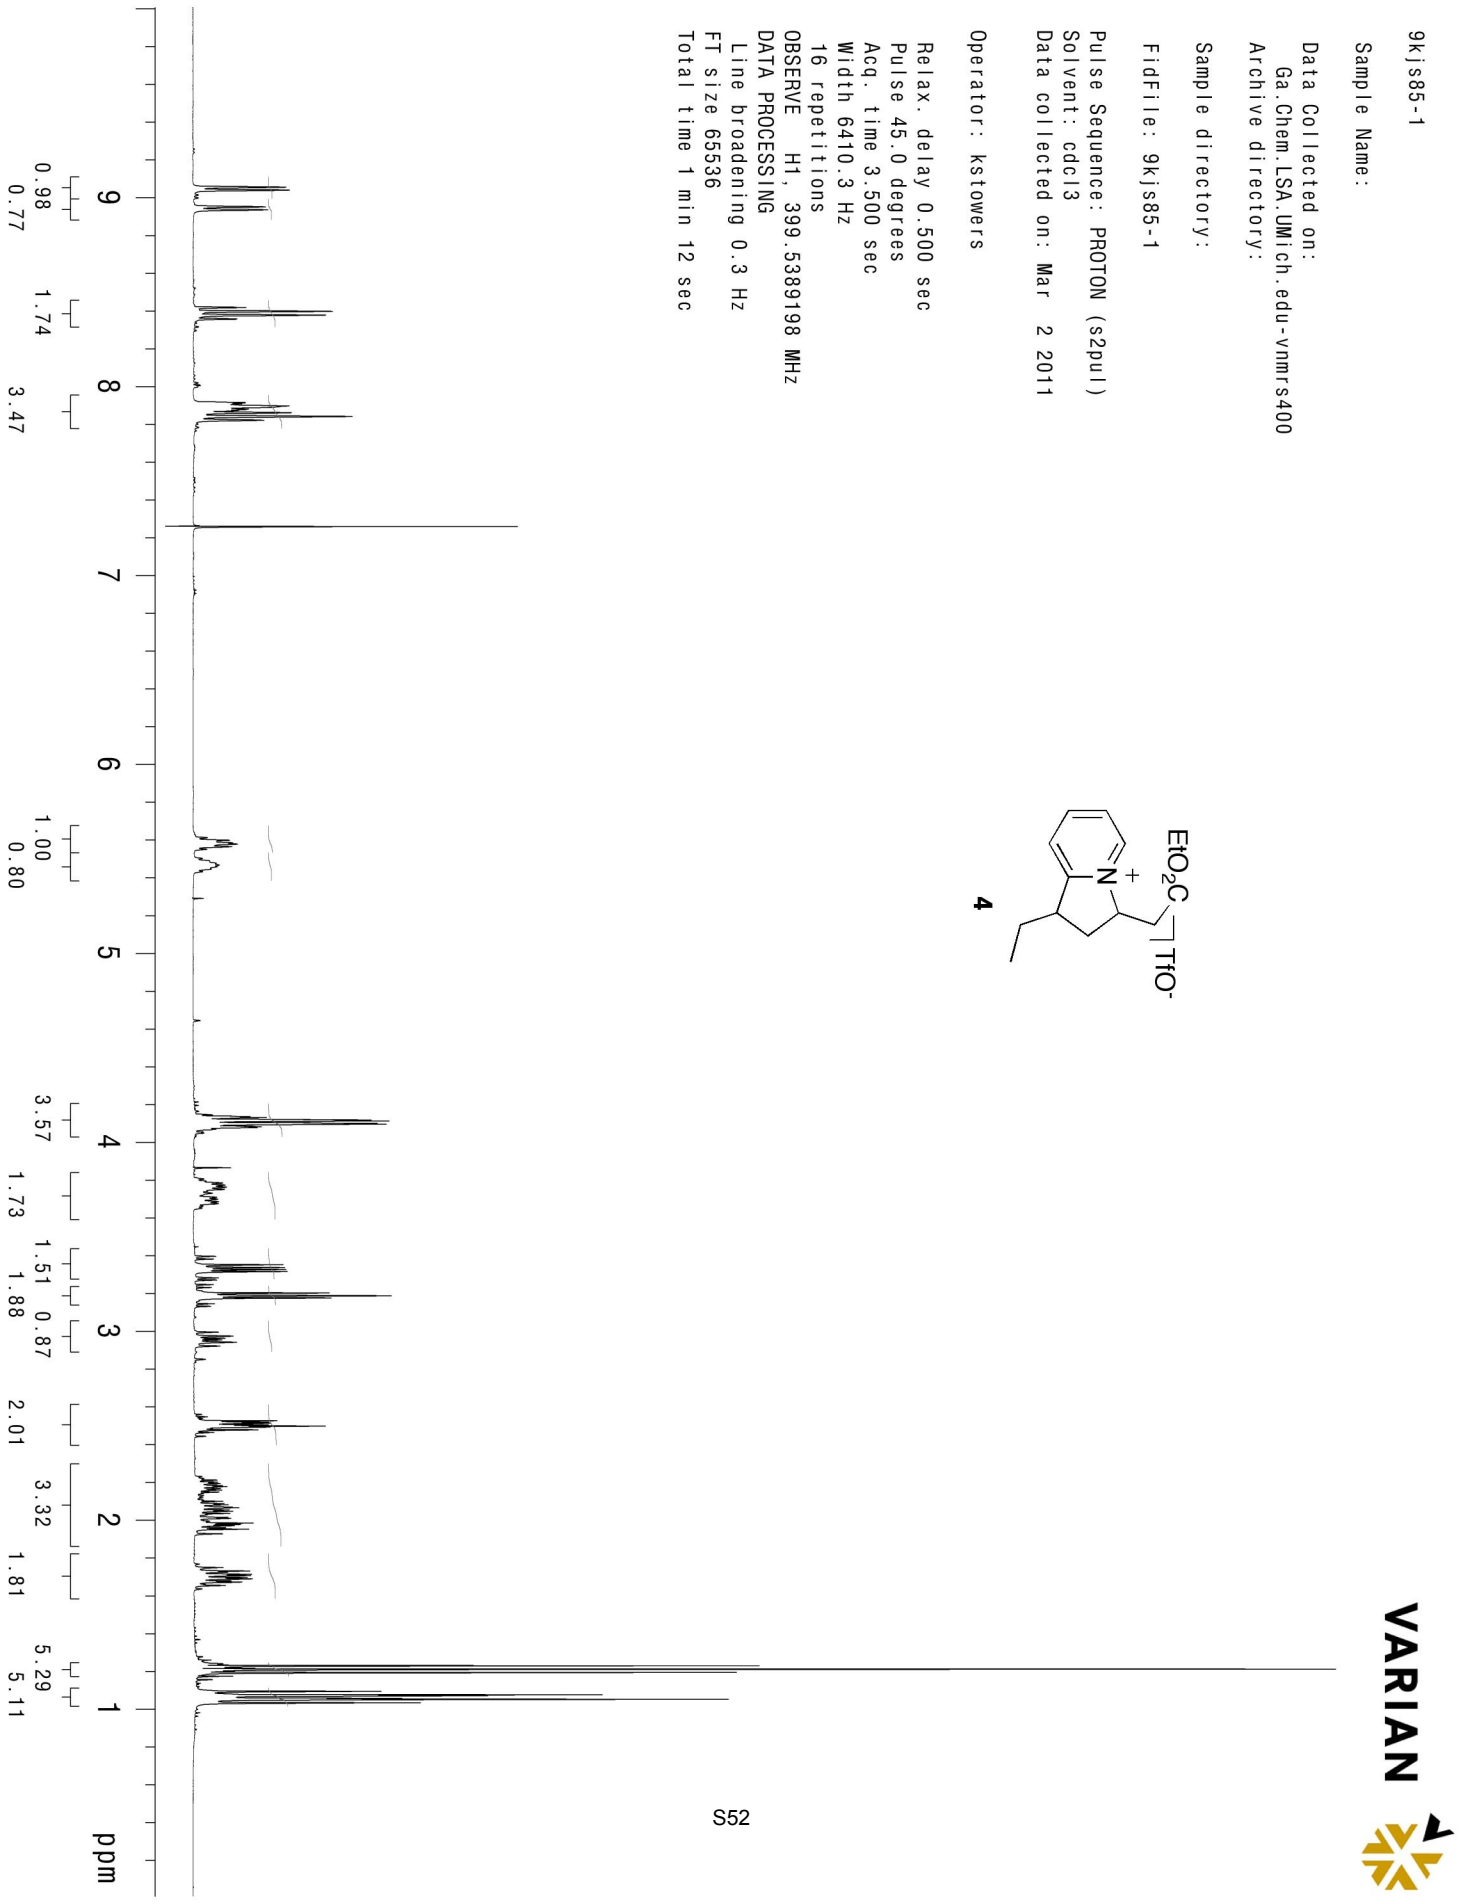



Sample Name :

Data Collected on:  
Co. Chem. USA. UMich. edu - vnmr400  
Archive directory:

Sample directory :

Fidfile : 9kjs25-1C

Pulse Sequence: CARBON (szpu1)  
Solvent: cdcl3  
Data collected on: Jan 10 2011

Operator : kstowers

Relax. delay 0.100 sec  
Pulse 45.0 degrees  
Acq. time 2.569 sec  
Width 25510.2 Hz  
736 repetitions  
OBSERVE C13, 100.7109739 MHz  
DECOUPLE H1, 400.5226414 MHz  
Power 41 dB  
continuously on  
WALTZ-16 modulated  
DATA PROCESSING  
Line broadening 1.0 Hz  
FT size 131072  
Total time 32 min

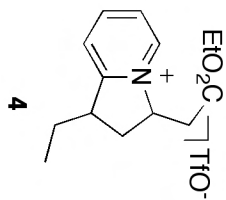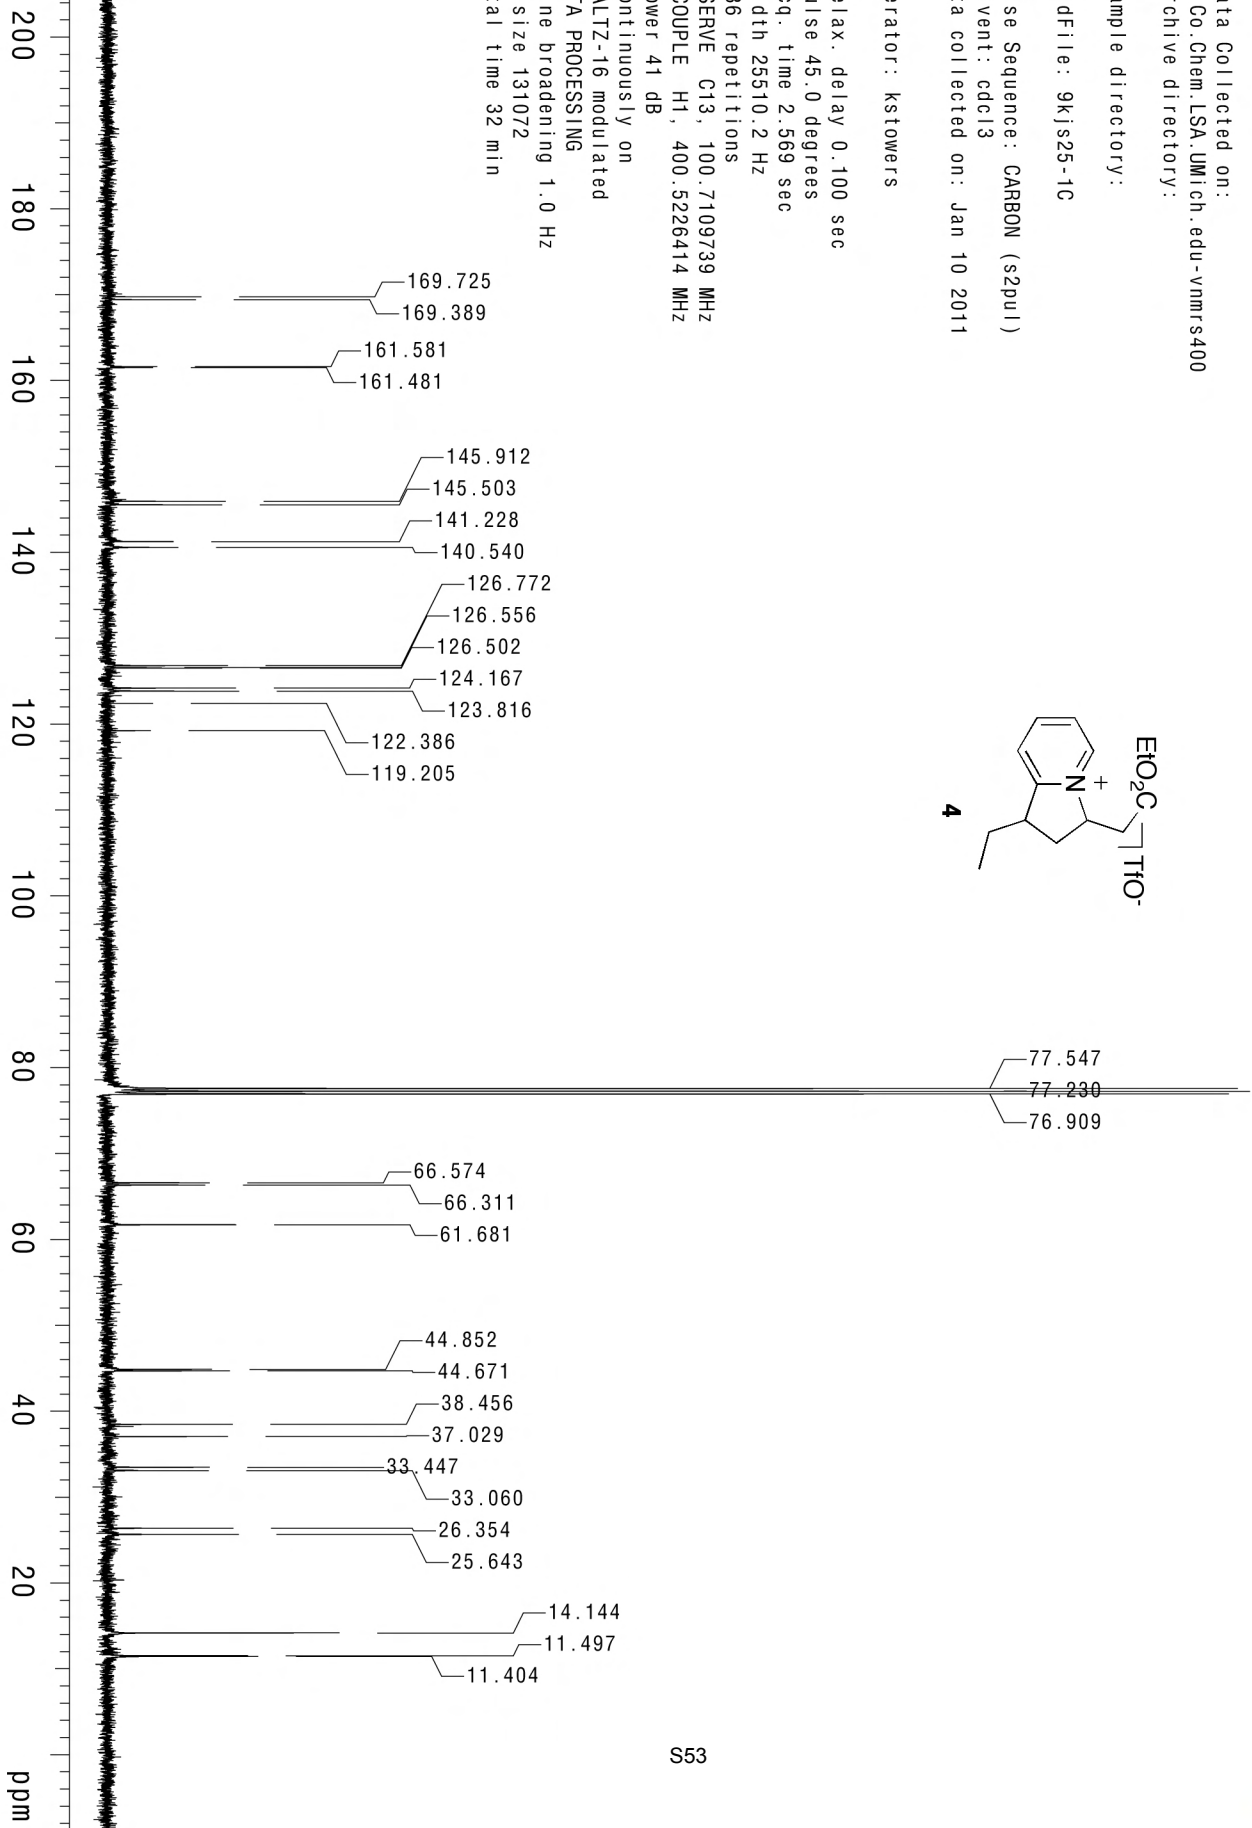

Sample Name :

Data Collected on :  
Co. Chem. USA. Umich. edu -vnmrs400  
Archive directory:

Sample directory:

Fidfile: 9kjs54-F

Pulse Sequence: FLUORINE (s2pul)  
Solvent: cdcl3  
Data collected on: Feb 1 2011Temp. 25.0 C / 298.1 K  
Operator: kstowersRelax. delay 1.000 sec  
Pulse 30.0 degrees  
Acq. time 0.734 sec  
Width 89285.7 Hz  
16 repetitions  
OBSERVE F19, 376.8659339 MHz  
DATA PROCESSING  
Line broadening 1.5 Hz  
FT size 131072  
Total time 0 min 31 sec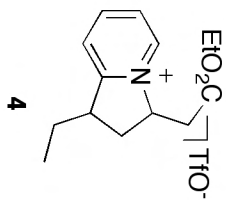

-78.399

Sample Name :

Data Collected on:  
Ga. Chem. LSA. UMich. edu - vnmr-s400  
Archive directory:

Sample directory:

Fidfile: 9kjs48-1

Pulse Sequence: PROTON (szpu1)  
Solvent: cdcl3  
Data collected on: Mar 1 2011

Operator: kstowers

Relax. delay 0.500 sec  
Pulse 45.0 degrees  
Acq. time 3.500 sec  
Width 6410.3 Hz  
16 repetitions  
OBSERVE H1, 399.5389198 MHz  
DATA PROCESSING  
Line broadening 0.3 Hz  
FT size 65536  
Total time 1 min 12 sec

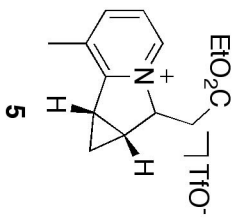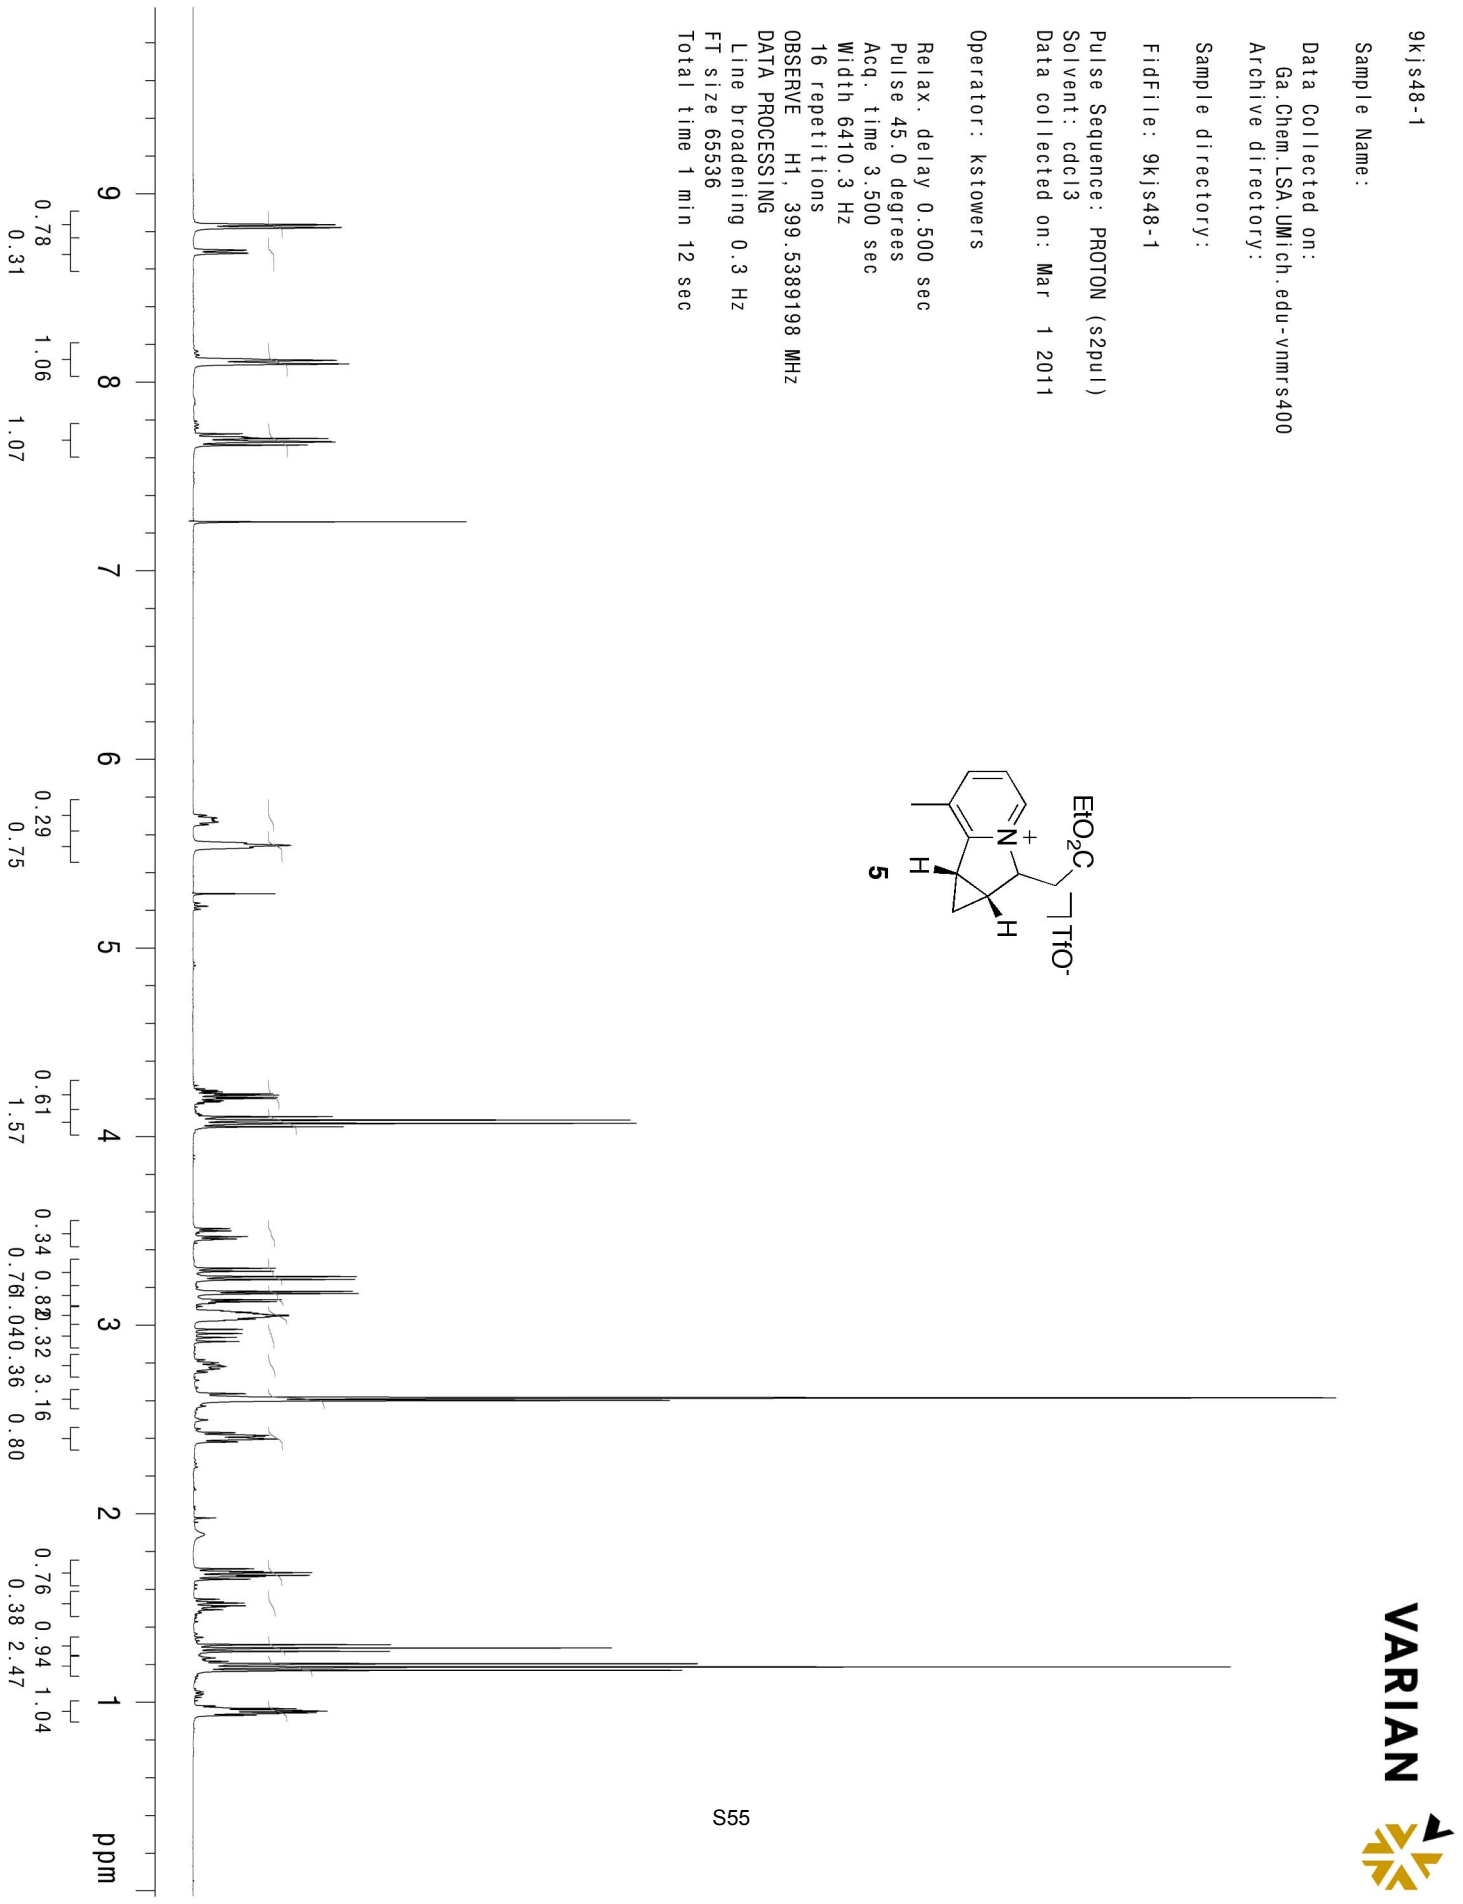

Sample Name :

Data Collected on:  
Co. Chem. USA. UMich. edu - vnmr5400  
Archive directory:

Sample directory :

Fidfile : 9kjs34-C

Pulse Sequence: CARBON (szpu1)  
Solvent: cdcl3  
Data collected on: Jan 20 2011

Operator : kstowers

Relax. delay 0.100 sec  
Pulse 45.0 degrees  
Acq. time 2.569 sec  
Width 25510.2 Hz  
1664 repetitions

OBSERVE C13, 100.7109754 MHz  
DECOUPLE H1, 400.5226414 MHz  
Power 41 dB  
continuously on  
WALTZ-16 modulated  
DATA PROCESSING  
Line broadening 1.0 Hz  
FT size 131072  
Total time 1 hr, 14 min

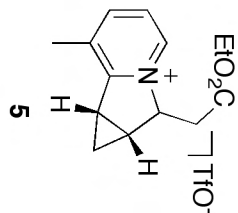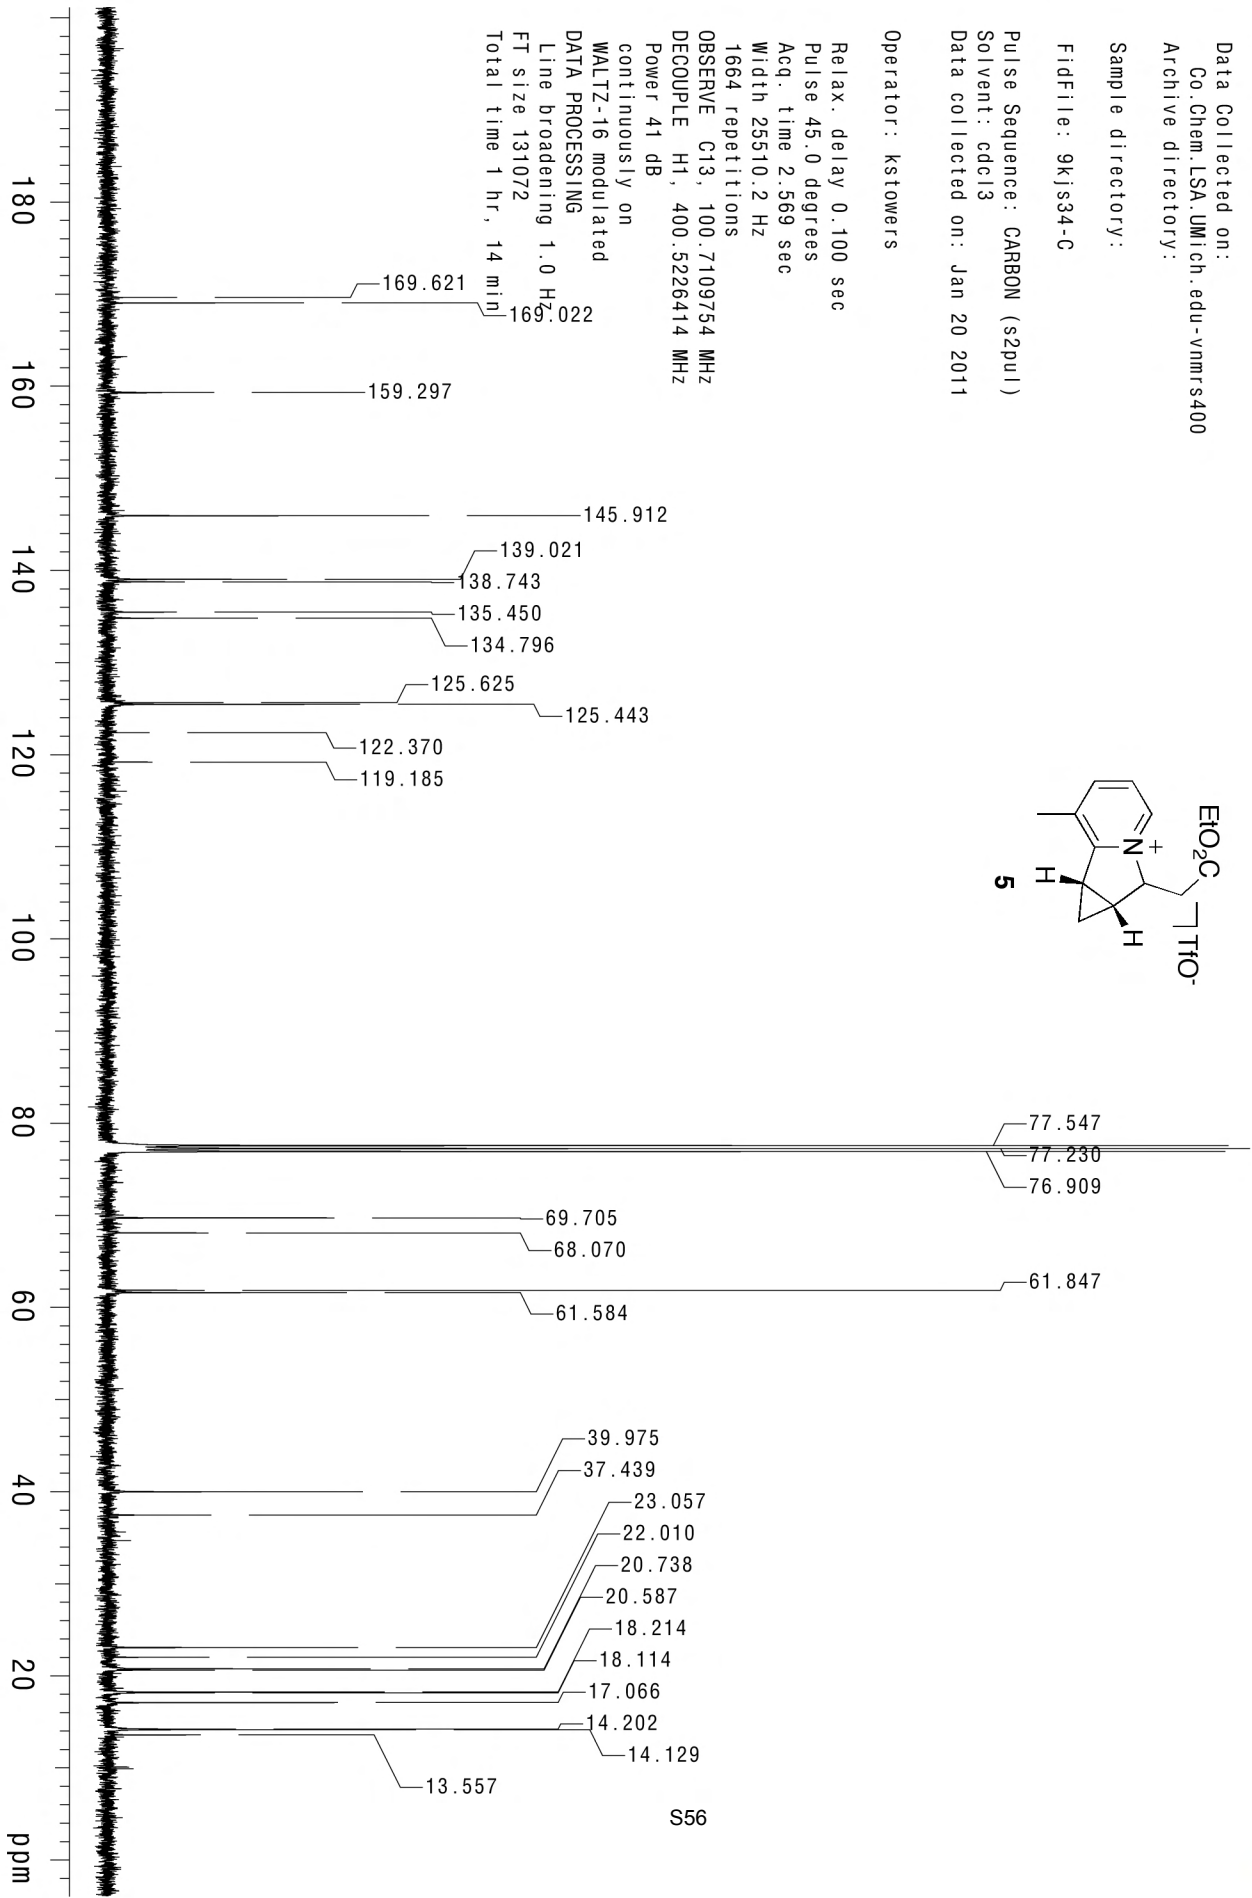

S56

Sample Name :

Data Collected on:  
Co. Chem. USA. UMich.edu-vnmrs400  
Archive directory:

Sample directory:

Fidfile: 9kjs48-F

Pulse Sequence: FLUORINE (s2pul)  
Solvent: cdcl3  
Data collected on: Feb 1 2011

Temp. 25.0 C / 298.1 K  
Operator: kstowers

Relax. delay 1.000 sec  
Pulse 30.0 degrees  
Acq. time 0.734 sec  
Width 89285.7 Hz  
16 repetitions  
OBSERVE F19, 376.8659339 MHz  
DATA PROCESSING  
Line broadening 1.5 Hz  
FT size 131072  
Total time 0 min 31 sec

-78.504

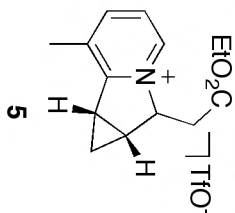

Sample Name :

Data Collected on :  
Ga. Chem. USA. UMICH.edu-vnmr400  
Archive directory:

Sample directory:

Fidfile: 9kjs39-1H

Pulse Sequence: PROTON (s2pu1)

Solvent: cdcl3

Data collected on: Jan 26 2011

Operator: kstowers

Relax. delay 0.500 sec

Pulse 45.0 degrees

Acq. time 3.500 sec

Width 6410.3 Hz

16 repetitions

OBSERVE H1, 399.5389151 MHz

DATA PROCESSING

Line broadening 0.3 Hz

FT size 65536

Total time 1 min 12 sec

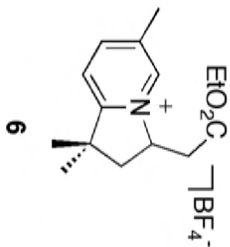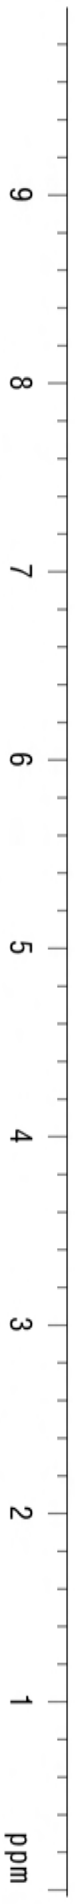

Sample Name:

Data Collected on:  
Ga. Chem. USA. Umich. edu - vnmr-s400  
Archive directory:

Sample directory:

Fidfile: 8k1st05-C

Pulse Sequence: CARBON (szpu1)  
Solvent: cdcl3  
Data collected on: Oct 20 2010

Operator: kstowers

Relax. delay 0.100 sec  
Pulse 45.0 degrees  
Acq. time 2.569 sec  
Width 25510.2 Hz

720 repetitions  
OBSERVE C13, 100.4641229 MHz  
DECOUPLE H1, 399.5409236 MHz  
Power 35 dB  
continuously on  
WALTZ-16 modulated  
DATA PROCESSING  
Line broadening 1.0 Hz  
FT size 131072  
Total time 32 min

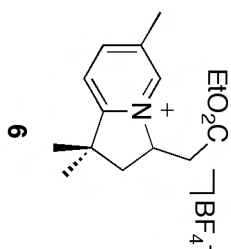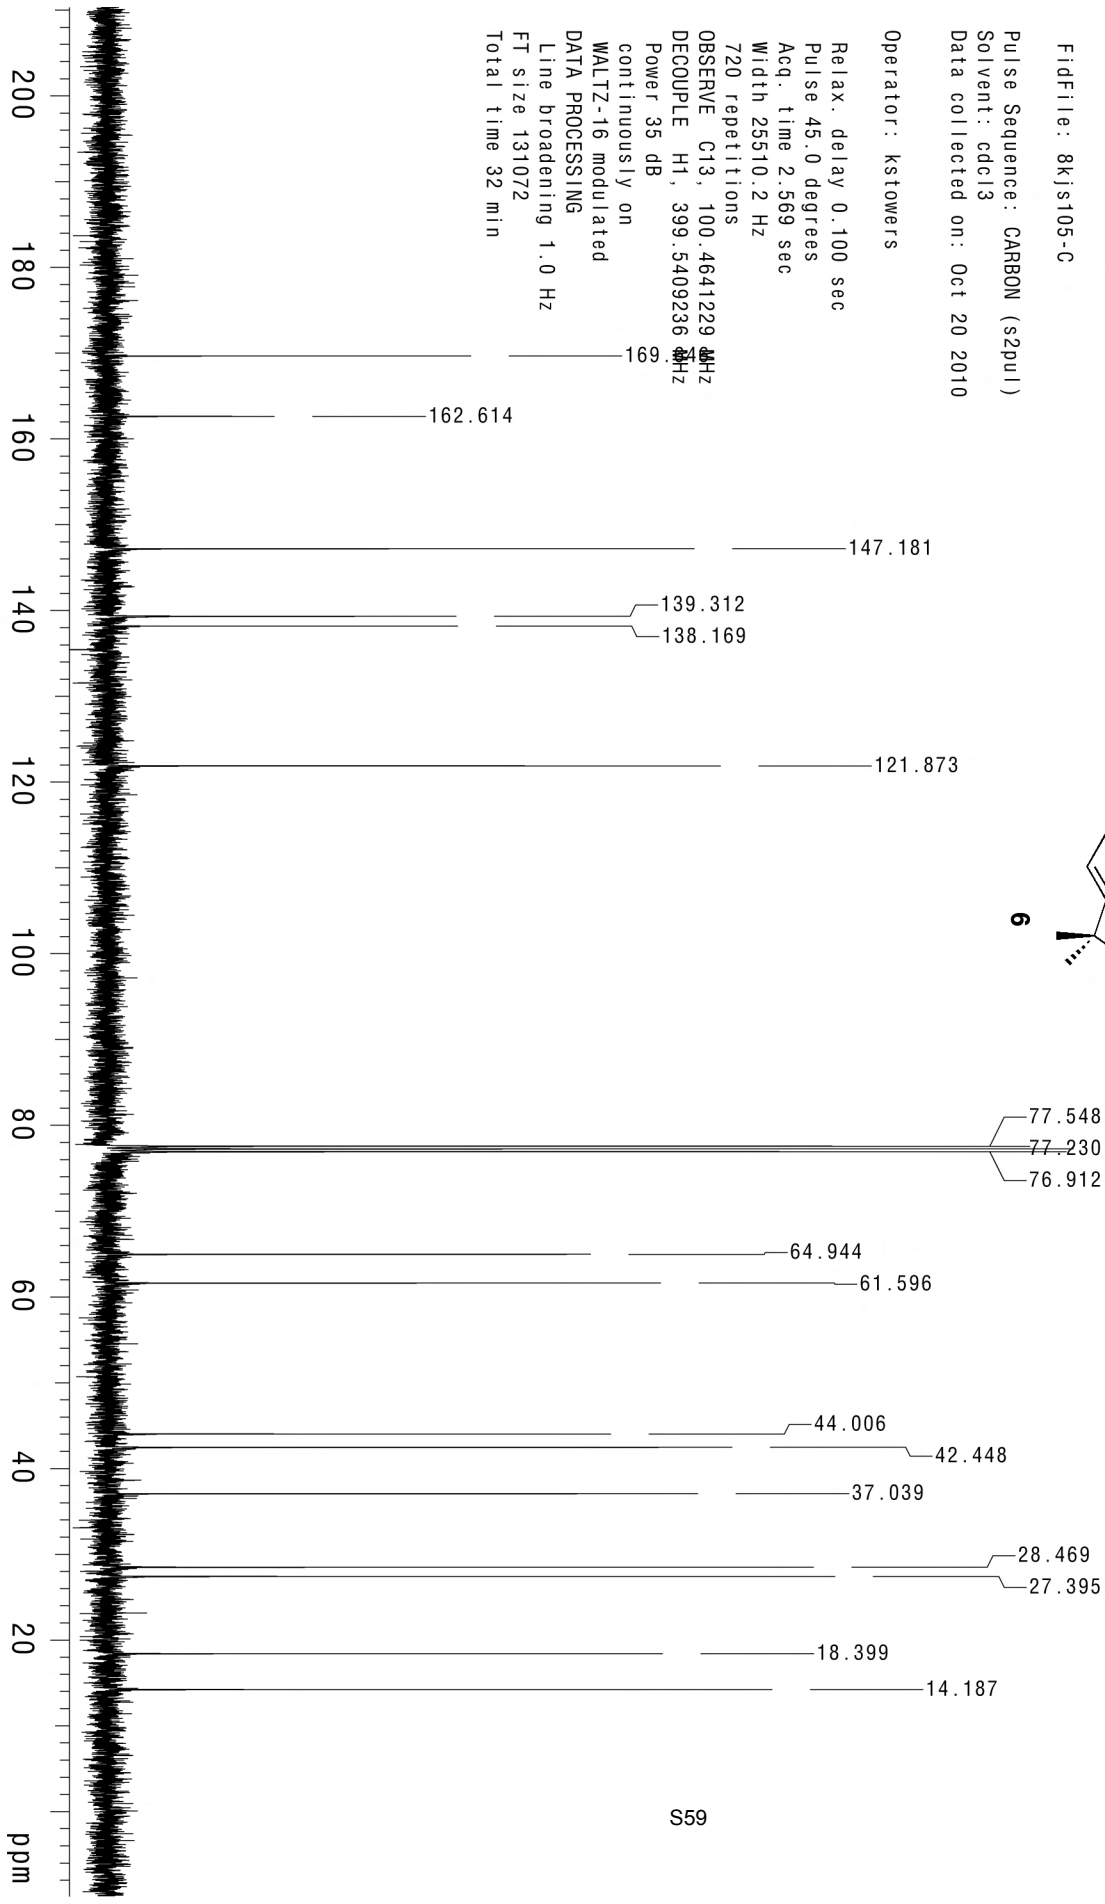

Sample Name :

Data Collected on :  
Co. Chem. USA. UMICH.edu-vmnrs400  
Archive directory :

Sample directory :

Fidfile : 9kjs39-1F

Pulse Sequence : FLUORINE (s2pul)

Solvent : cdcl3

Data collected on : Jan 18 2011

Operator : kstowers

Relax. delay 1.000 sec

Pulse 30.0 degrees

Acq. time 0.734 sec

Width 89285.7 Hz

16 repetitions

OBSERVE F19, 376.8659339 MHz

DATA PROCESSING

Line broadening 1.5 Hz

FT size 131072

Total time 0 min 31 sec

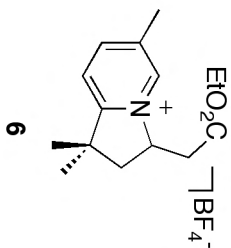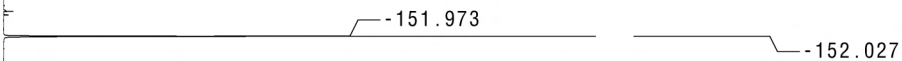



Sample Name :

Data Collected on :  
 Co. Chem. LSA, UMich, edu - vnmr-s400  
 Archive directory :

Sample directory :

Fidfile: 8k1s171-HNMR1

Pulse Sequence: PROTON (szpu1)  
 Solvent: cdcl3  
 Data collected on: Dec 15 2010

Operator: kstowers

Relax. delay 0.500 sec  
 Pulse 45.0 degrees  
 Acq. time 3.500 sec  
 Width 6410.3 Hz  
 16 repetitions  
 OBSERVE H1, 400.5206278 MHz  
 DATA PROCESSING  
 Line broadening 0.3 Hz  
 FT size 65536  
 Total time 1 min 12 sec

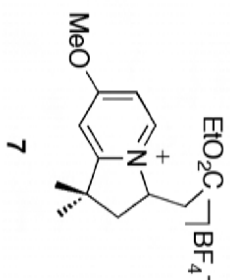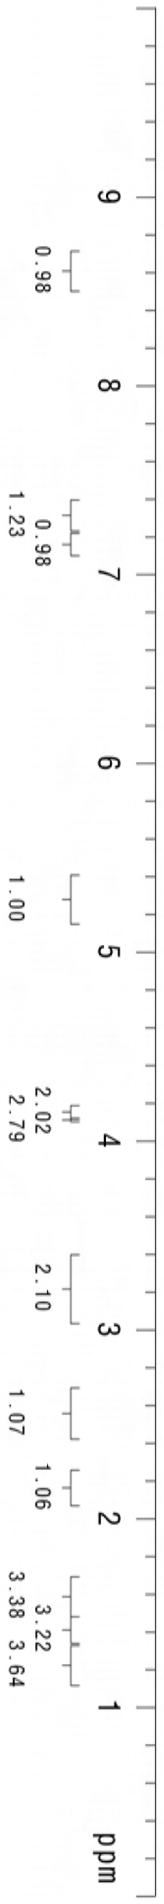

Sample Name :

Data Collected on:  
Co. Chem. USA. UMICH.edu-vnmrs400  
Archive directory:

Sample directory :

Fidfile : 8kjs171-1-CNMR

Pulse Sequence: CARBON (szpu1)  
Solvent: cdcl3  
Data collected on: Nov 30 2010

Temp. 25.0 C / 298.1 K  
Operator: kstowers

Relax. delay 0.100 sec  
Pulse 45.0 degrees  
Acq. time 2.569 sec  
Width 25510.2 Hz  
384 repetitions  
OBSERVE C13, 100.7109723 MHz  
DECOUPLE H1, 400.5226414 MHz  
Power 41 dB  
continuously on  
WALTZ-16 modulated  
DATA PROCESSING  
Line broadening 1.0 Hz  
FT size 131072  
Total time 17 min

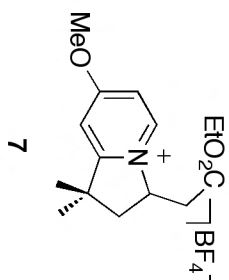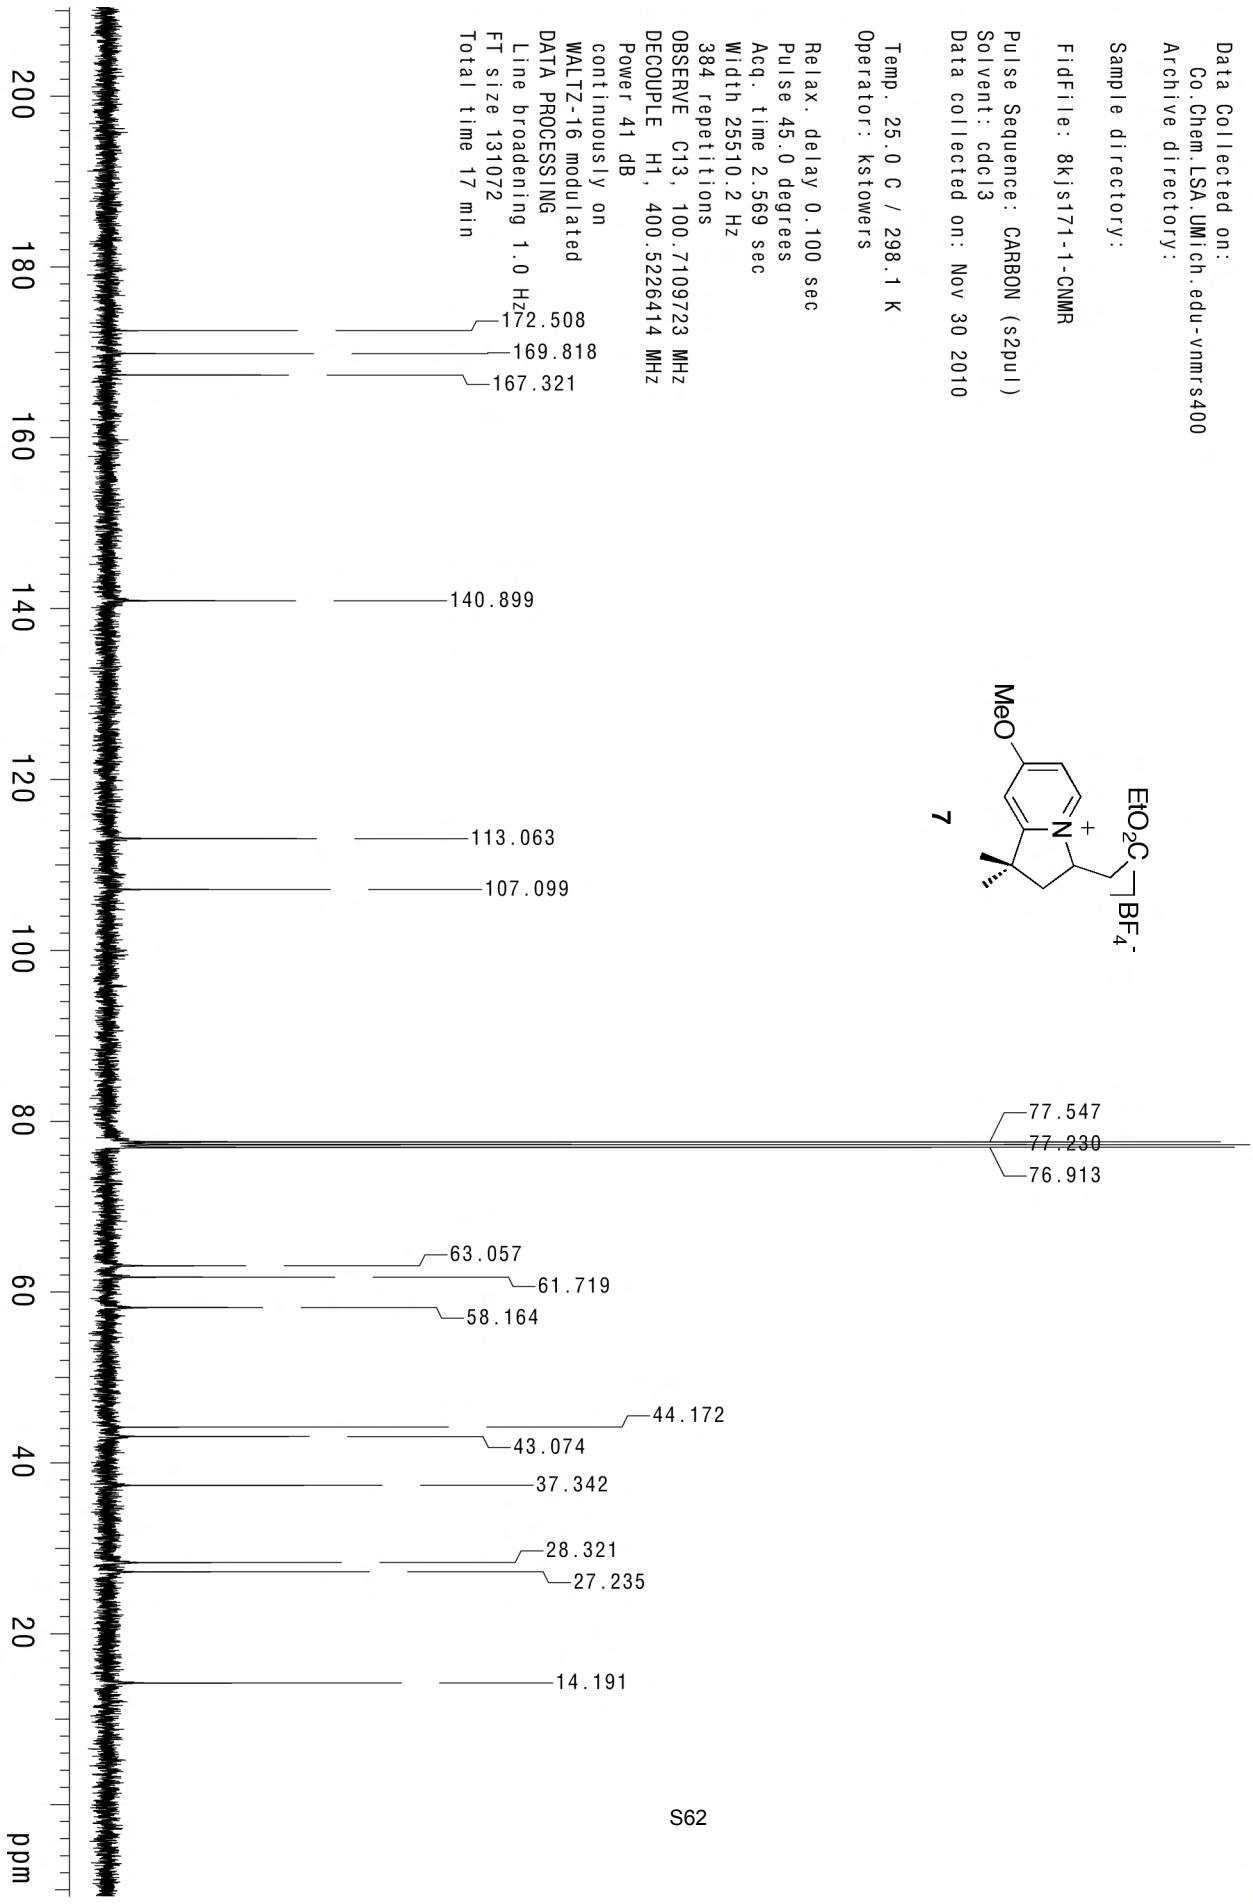

Sample Name :

Data Collected on:  
Co. Chem. USA. UMICH.edu-vnmrs400  
Archive directory:

Sample directory:

Fidfile: 9kjs171-F

Pulse Sequence: FLUORINE (s2pul)

Solvent: cdcl3

Data collected on: Jan 13 2011

Operator: kstowers

Relax. delay 1.000 sec

Pulse 30.0 degrees

Acq. time 0.734 sec

Width 89285.7 Hz

16 repetitions

OBSERVE F19, 376.8659339 MHz

DATA PROCESSING

Line broadening 1.5 Hz

FT size 131072

Total time 0 min 31 sec

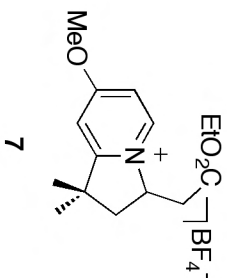

-152.537

-152.482

9k1st80-C1st

Sample Name :

Data Collected on:  
Co. Chem. USA. Umich. edu - vnmr-s400  
Archive directory:

Sample directory:

Fidfile: 9k1st80-C1st

Pulse Sequence: PROTON (szpu1)  
Solvent: cdcl3  
Data collected on: Jan 14 2011

Operator: kstowers

Relax. delay 0.500 sec  
Pulse 45.0 degrees  
Acq. time 3.500 sec  
Width 6410.3 Hz  
Single scan  
OBSERVE H1, 400.5206276 MHz  
DATA PROCESSING  
Line broadening 0.3 Hz  
FT size 65536  
Total time 0 min 12 sec

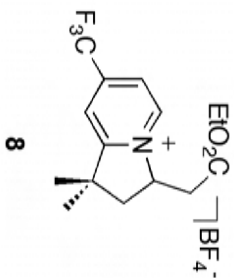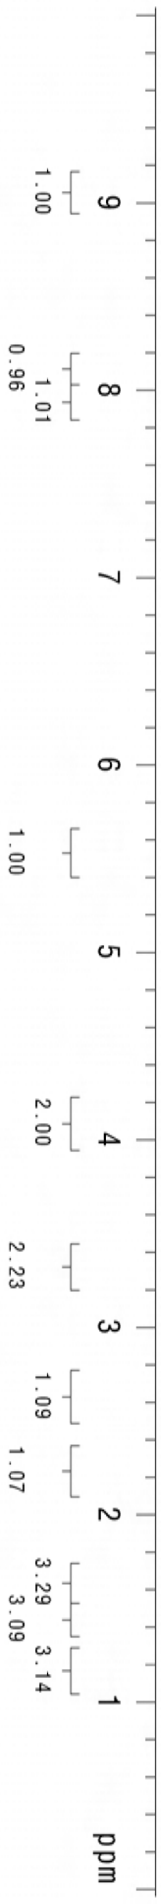

Sample Name:

Data Collected on:  
Co. Chem. USA. UMICH.edu -vnmr-s400  
Archive directory:

Sample directory:

Fidfile: 9kjs180-C

Pulse Sequence: CARBON (szpu1)  
Solvent: cdcl3  
Data collected on: Jan 14 2011

Operator: kstowers

Relax. delay 0.100 sec  
Pulse 45.0 degrees  
Acq. time 2.569 sec  
Width 25510.2 Hz  
9728 repetitions  
OBSERVE C13, 100.7109778 MHz  
DECOUPLE H1, 400.5226414 MHz  
Power 41 dB  
continuously on  
WALTZ-16 modulated  
DATA PROCESSING  
Line broadening 1.0 Hz  
FT size 131072  
Total time 7 hr, 14 min

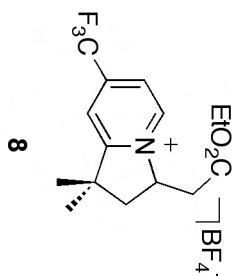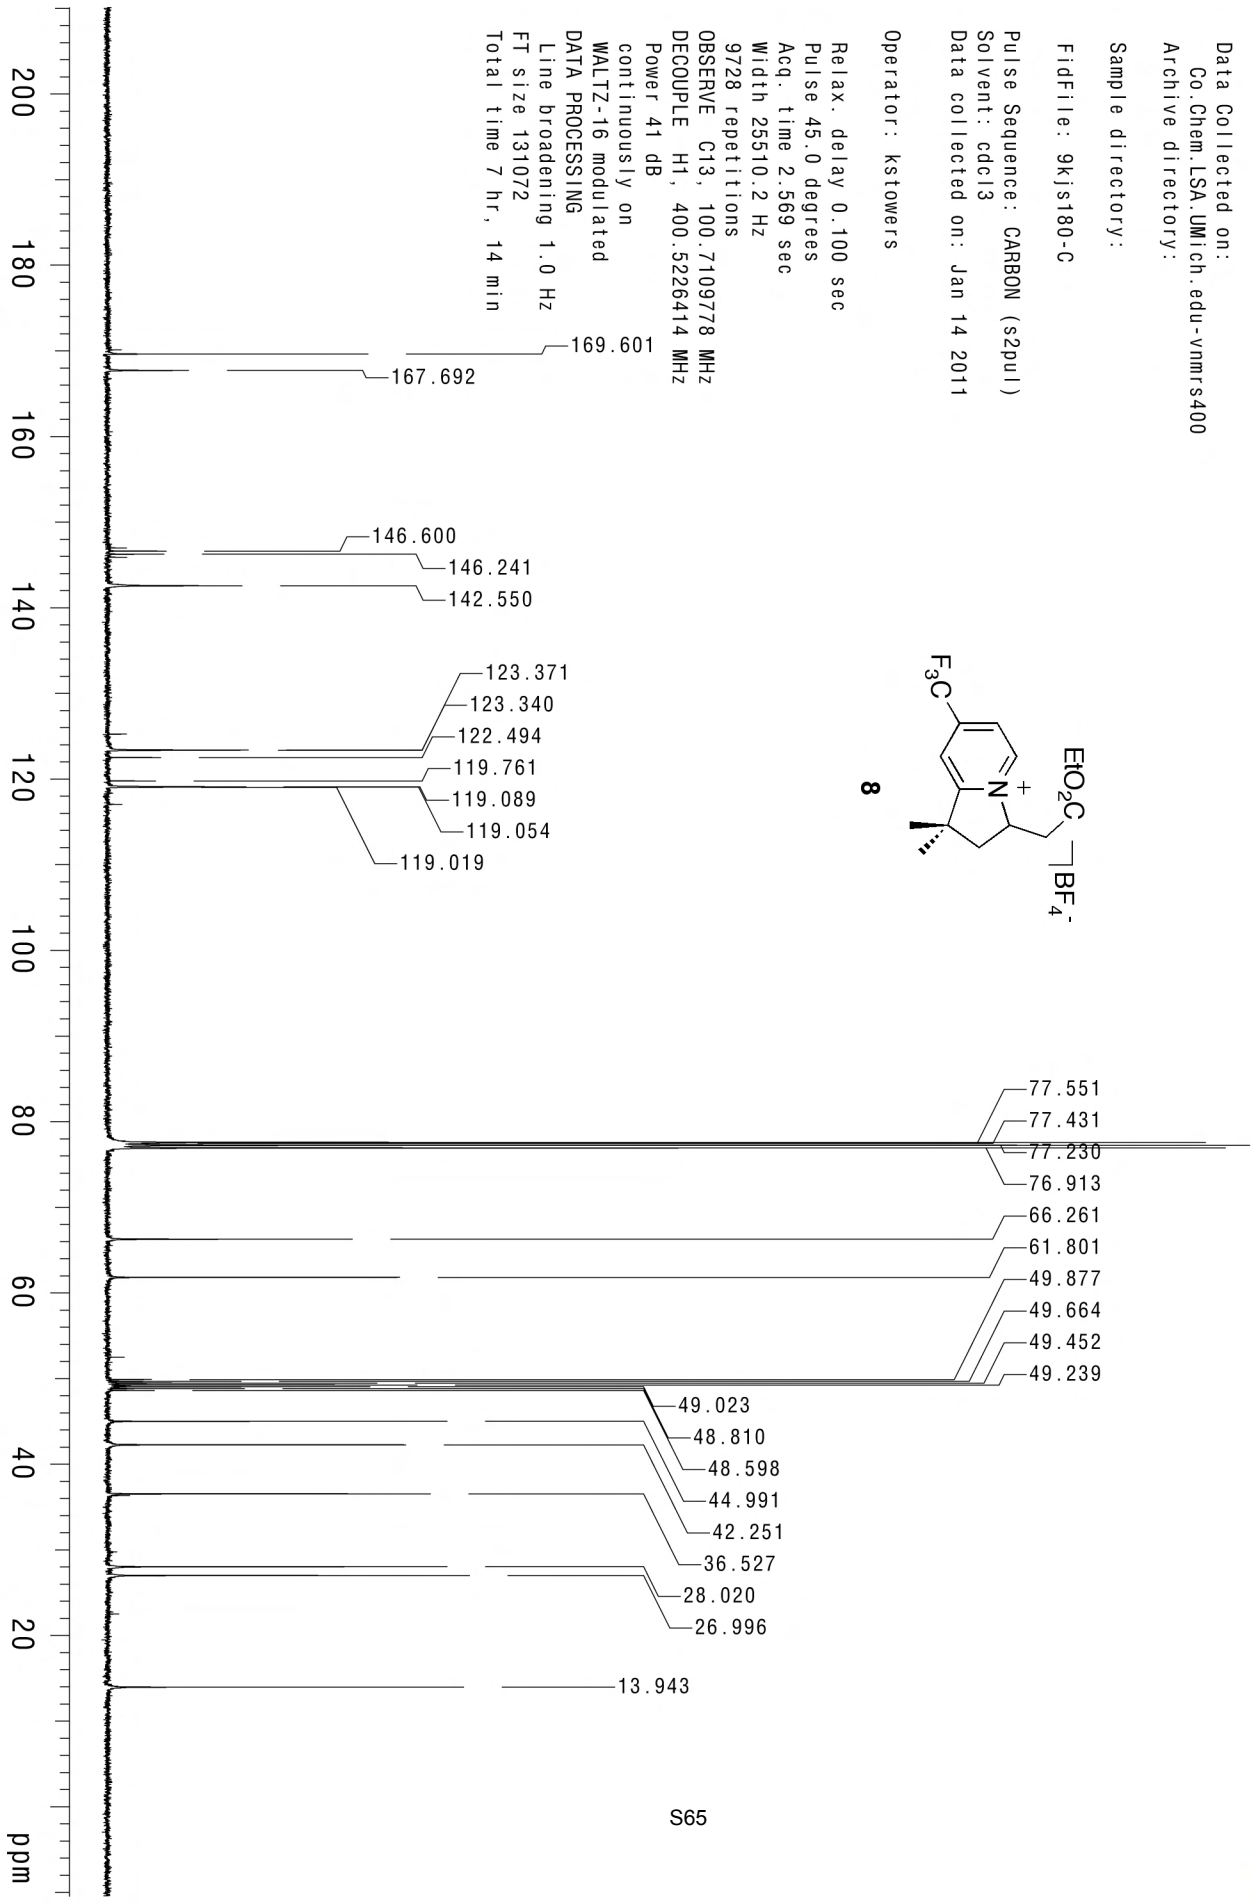

9k1st180-F

Sample Name:

Data Collected on:

Co. Chem. USA, UMich. edu-vmrms400

Archive directory:

Sample directory:

Fidfile: 9k1st180-F

Pulse Sequence: FLUORINE (s2pul)

Solvent: cdcl3

Data collected on: Jan 13 2011

Operator: kstowers

Relax. delay 1.000 sec

Pulse 30.0 degrees

Acq. time 0.734 sec

Width 89285.7 Hz

16 repetitions

OBSERVE F19, 376.8659339 MHz

DATA PROCESSING

Line broadening 1.5 Hz

FT size 131072

Total time 0 min 31 sec

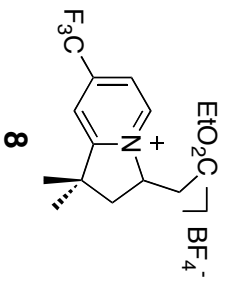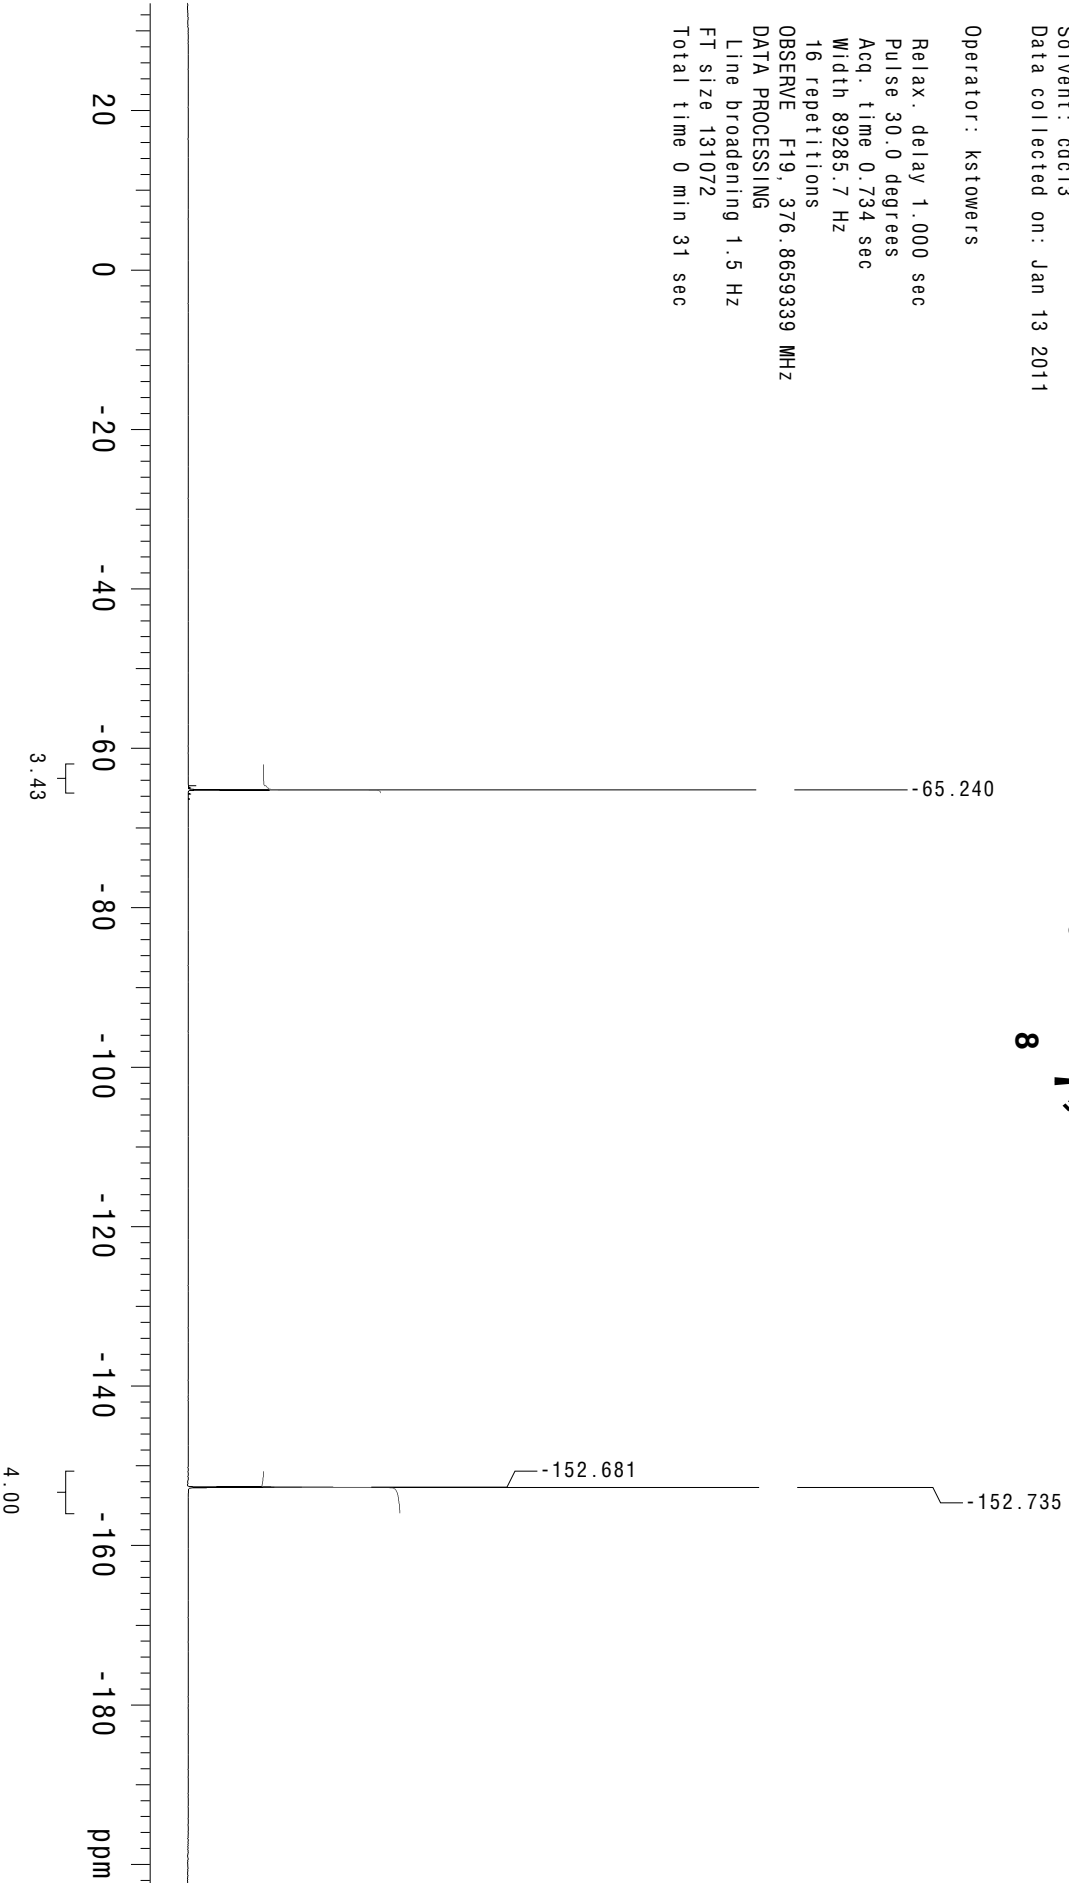

Sample Name :

Data Collected on:  
 Ga. Chem. LSA: UMich.edu-vnmrs400  
 Archive directory:

Sample directory:

Fidfile: 9kjs79-1

Pulse Sequence: PROTON (szpu1)  
 Solvent: cdcl3  
 Data collected on: Mar 4 2011

Operator: kstowers

Relax. delay 0.500 sec  
 Pulse 45.0 degrees  
 Acq. time 3.500 sec  
 Width 6410.3 Hz  
 16 repetitions  
 OBSERVE H1, 399.5389198 MHz  
 DATA PROCESSING  
 Line broadening 0.3 Hz  
 FT size 65536  
 Total time 1 min 12 sec

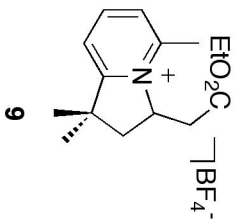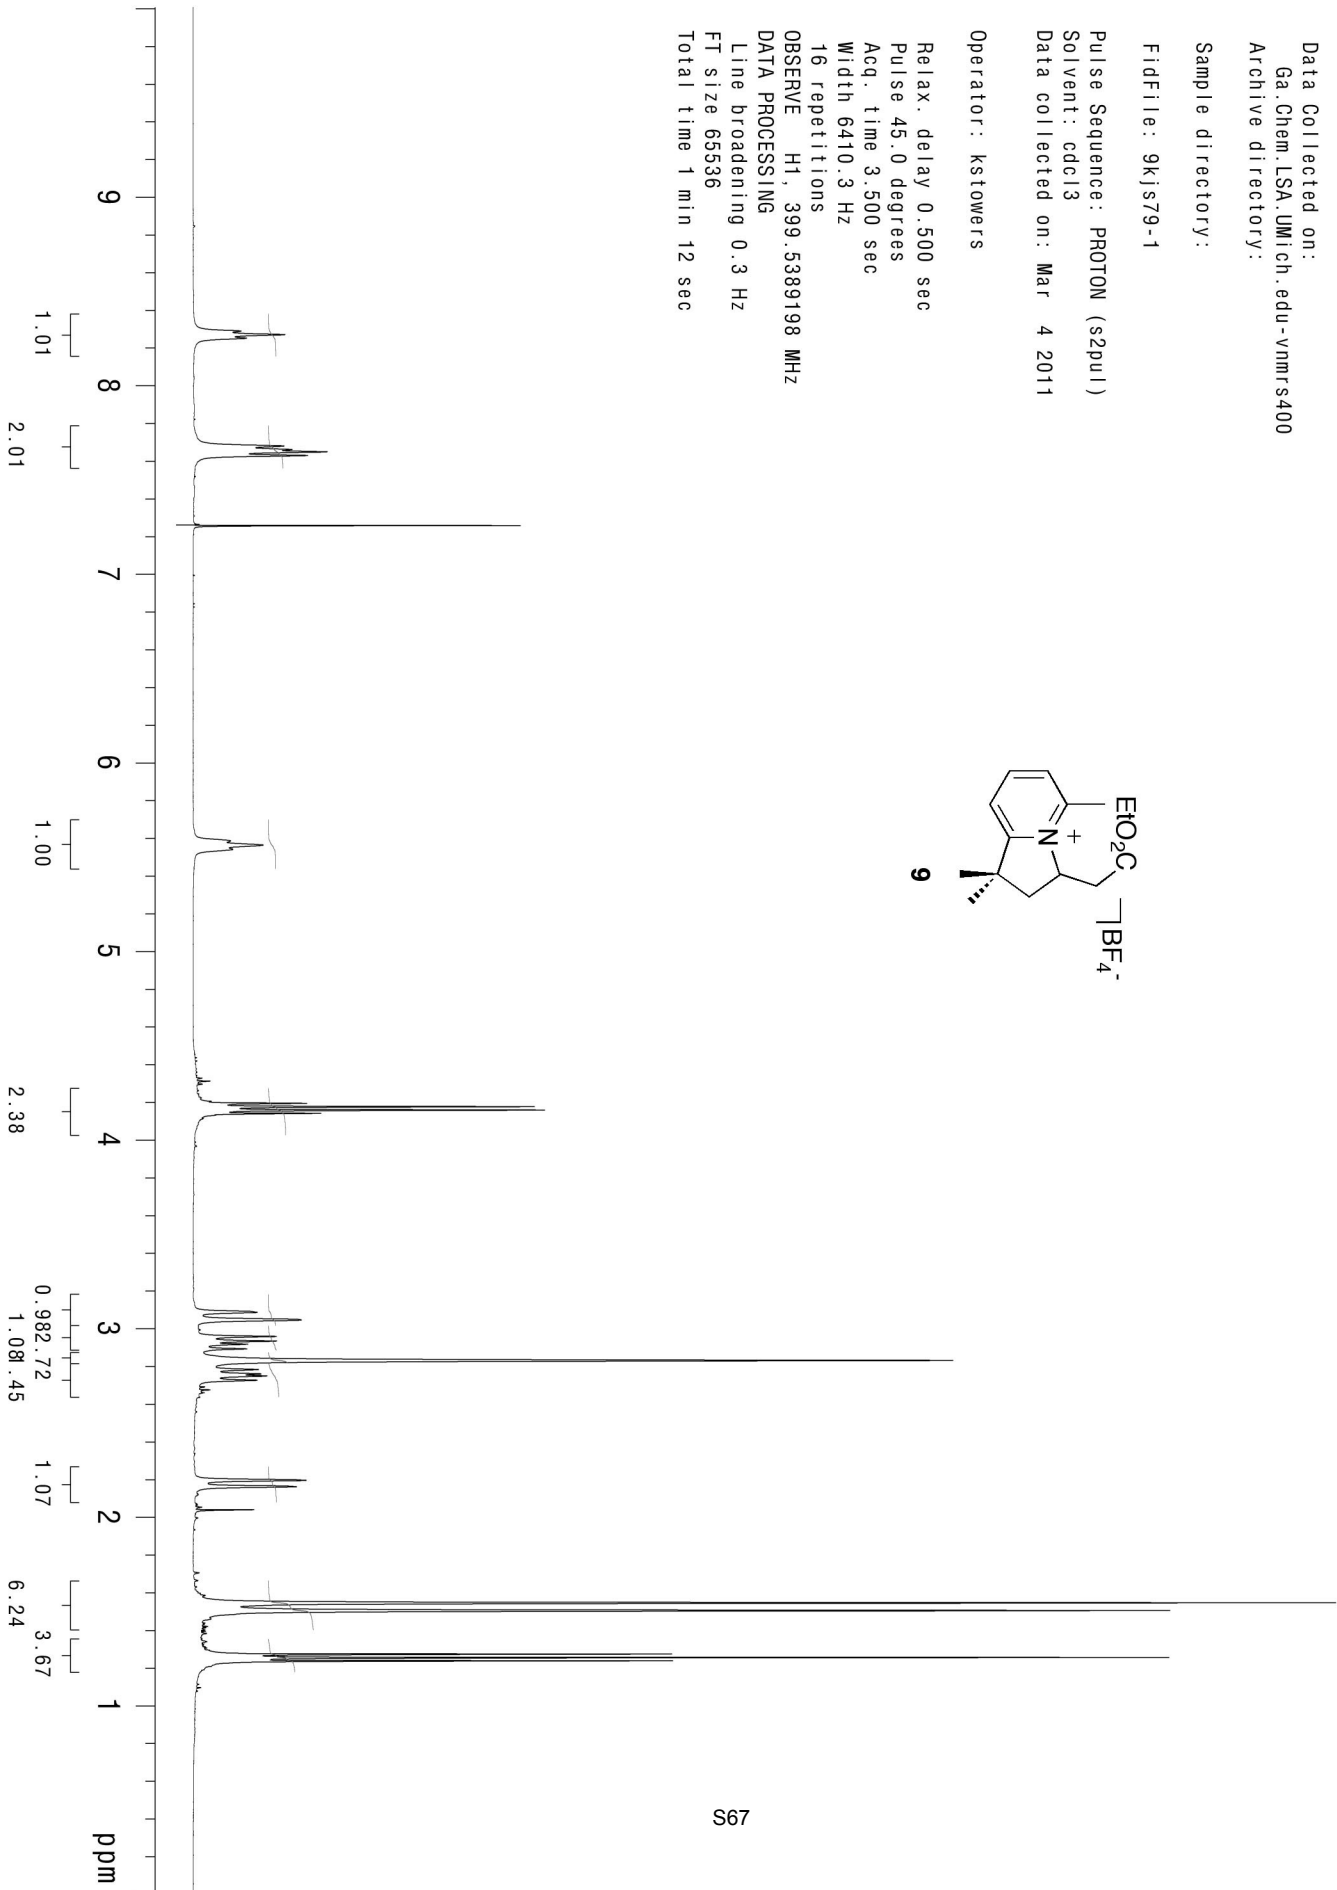

Sample Name :

Data Collected on:  
Co. Chem. LSA. UMich. edu- vnmr-s400  
Archive directory:

Sample directory:

Fidfile: 8kjs79-2C

Pulse Sequence: CARBON (szpul)

Solvent: cdcl3

Data collected on: Jan 18 2011

Operator: kstowers

Relax. delay 0.100 sec  
Pulse 45.0 degrees  
Acq. time 2.569 sec  
Width 25510.2 Hz  
848 repetitions  
OBSERVE C13, 100.7109746 MHz  
DECUPLE H1, 400.5226414 MHz  
Power 41 dB  
continuously on  
WALTZ-16 modulated  
DATA PROCESSING  
Line broadening 1.0 Hz  
FT size 131072  
Total time 37 min

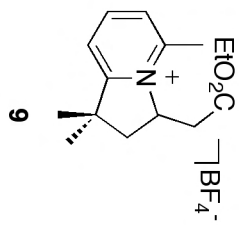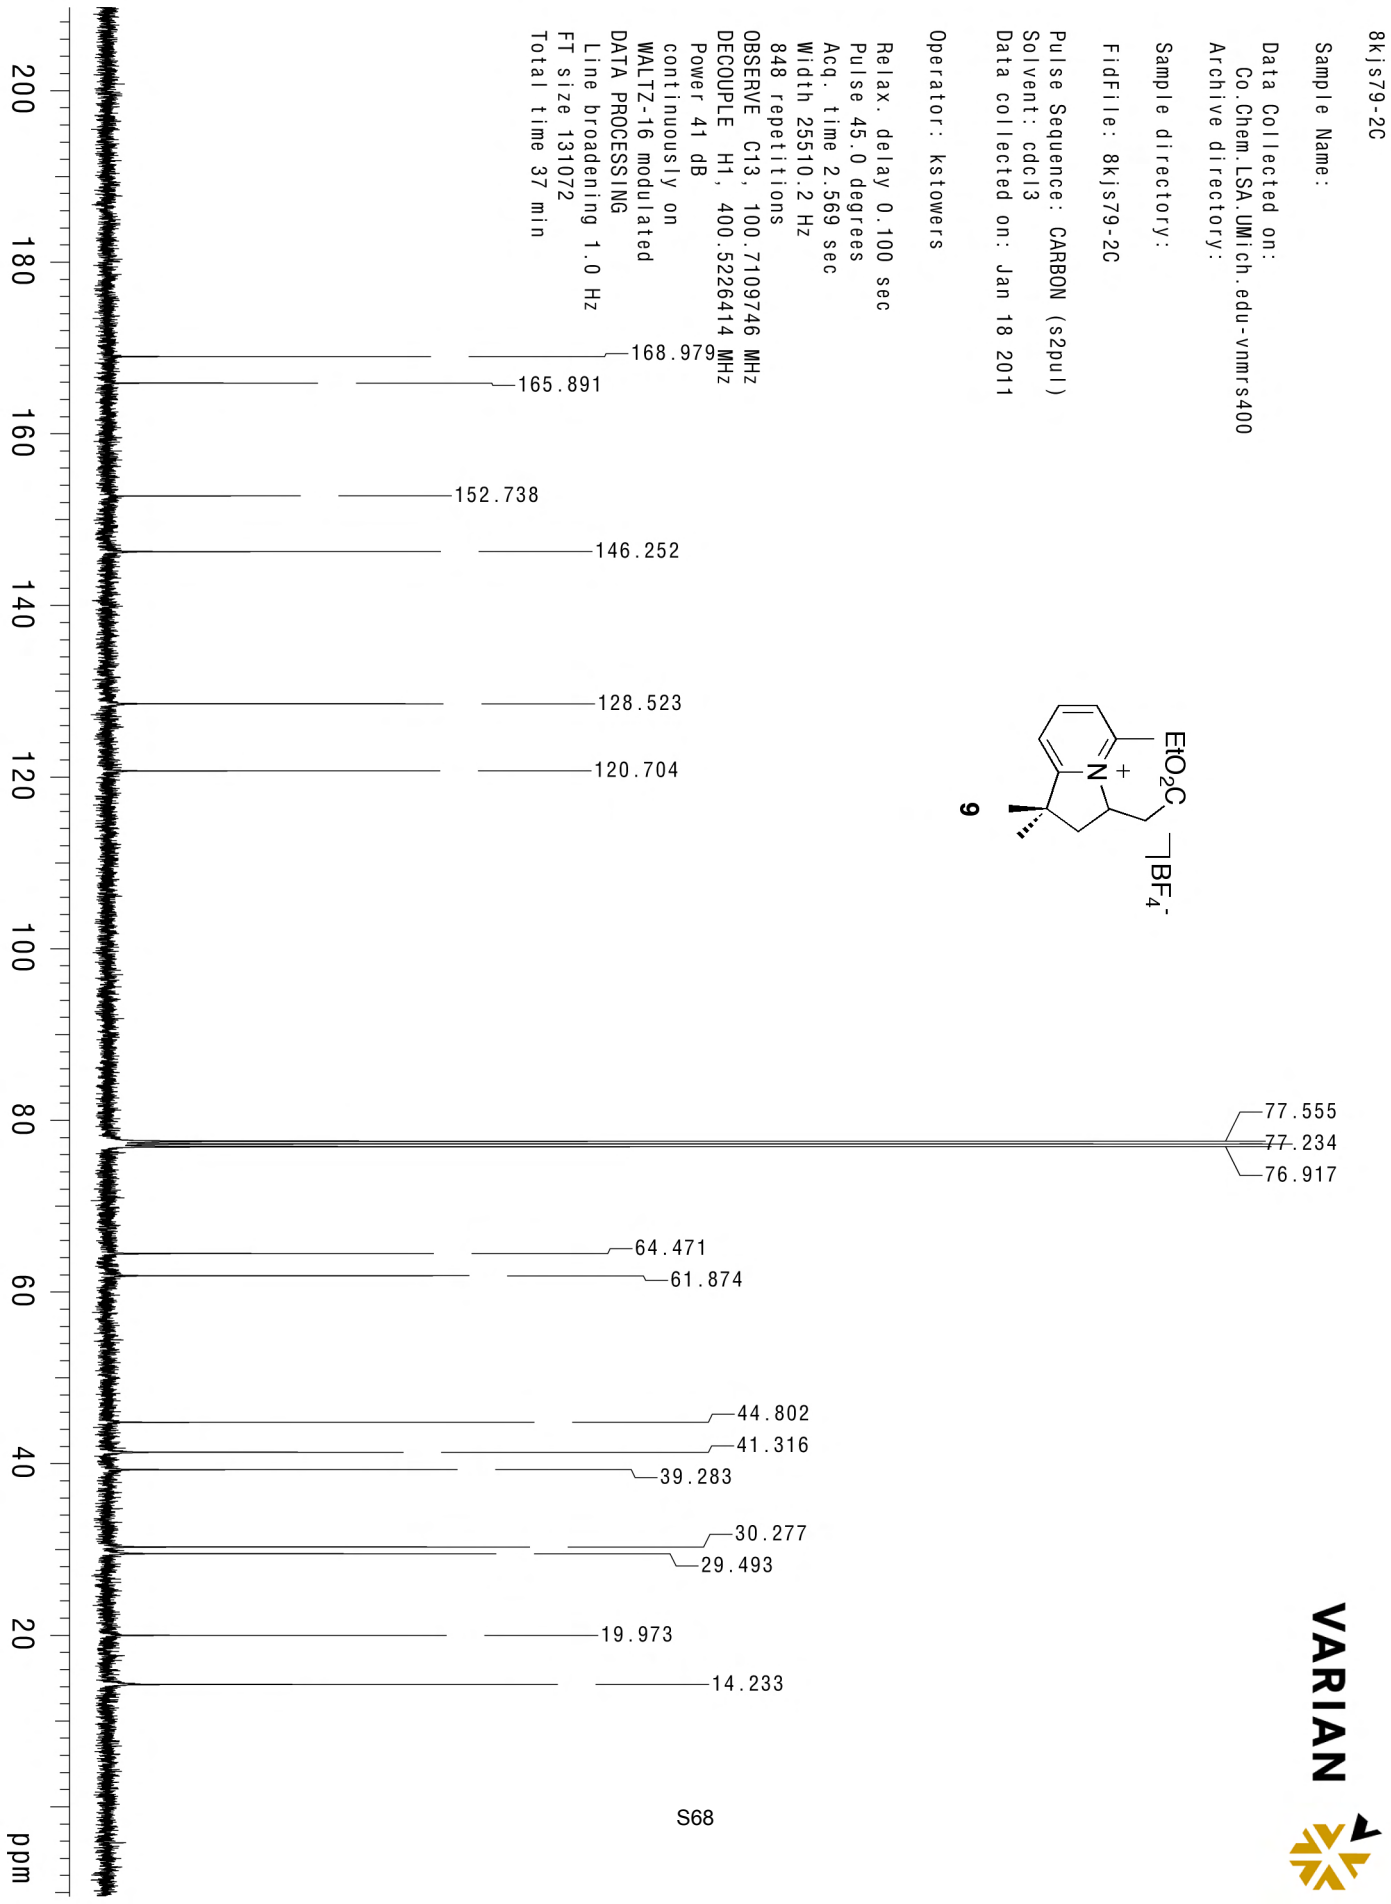



Sample Name :

Data Collected on:  
Co. Chem. USA. Umich.edu-vnmr-s400  
Archive directory:

Sample directory :

Fidfile : 8k1s198-1F

Pulse Sequence : FLUORINE (s2pul)

Solvent : cdcl3

Data collected on : Dec 18 2010

Operator : kstowers

Relax. delay 1.000 sec

Pulse 30.0 degrees

Acq. time 0.734 sec

Width 89285.7 Hz

16 repetitions

OBSERVE F19, 376.8659339 MHz

DATA PROCESSING

Line broadening 1.5 Hz

FT size 131072

Total time 0 min 31 sec

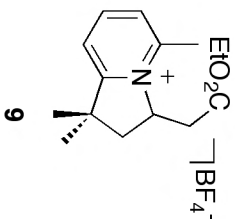

-153.216

-153.270

Sample Name :

Data Collected on:  
Te-vnmrs500  
Archive directory:

Sample directory:

Fidfile: 9kjs74-311

Pulse Sequence: PROTON (szpul)  
Solvent: CDCl3  
Data collected on: Mar 11 2011Temp. 25.0 C / 298.1 K  
Operator: kstowersRelax. delay 0.500 sec  
Pulse 45.0 degrees  
Acq. time 3.500 sec  
Width 8012.8 Hz  
16 repetitionsOBSERVE H1, 500.0931710 MHz  
DATA PROCESSING  
Line broadening 0.3 Hz  
FT size 65536  
Total time 1 min 12 sec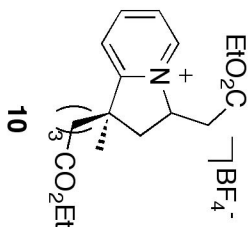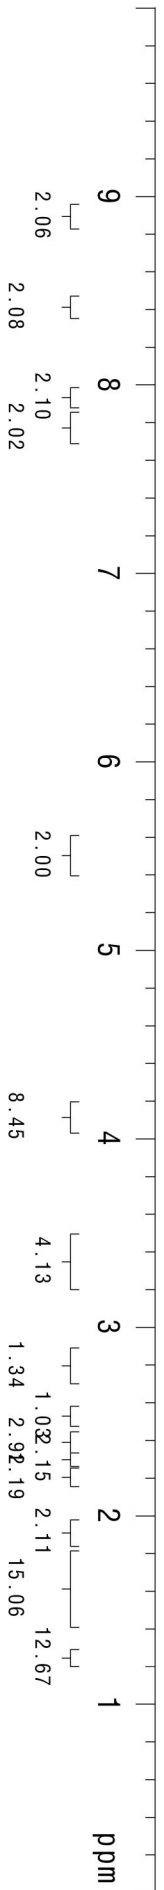

Sample Name:

Data Collected on:  
Te-vmrms500  
Archive directory:

Sample directory:

Fidfile: 9kjs74-C

Pulse Sequence: CARBON (szpu1)  
Solvent: CDCl3  
Data collected on: Mar 12 2011

Operator: kstowers

Relax. delay 0.100 sec  
Pulse 45.0 degrees

Acq. time 2.045 sec

Width 32051.3 Hz

3872 repetitions

OBSERVE G13, 125.7485012 MHz  
DECOUPLE H1, 500.0956704 MHz

Power 42 dB

continuously on

WALTZ-16 modulated

DATA PROCESSING

Line broadening 1.0 Hz

FT size 131072

Total time 2 hr, 18 min

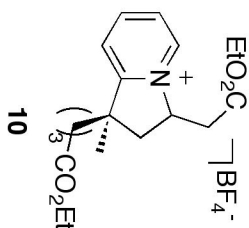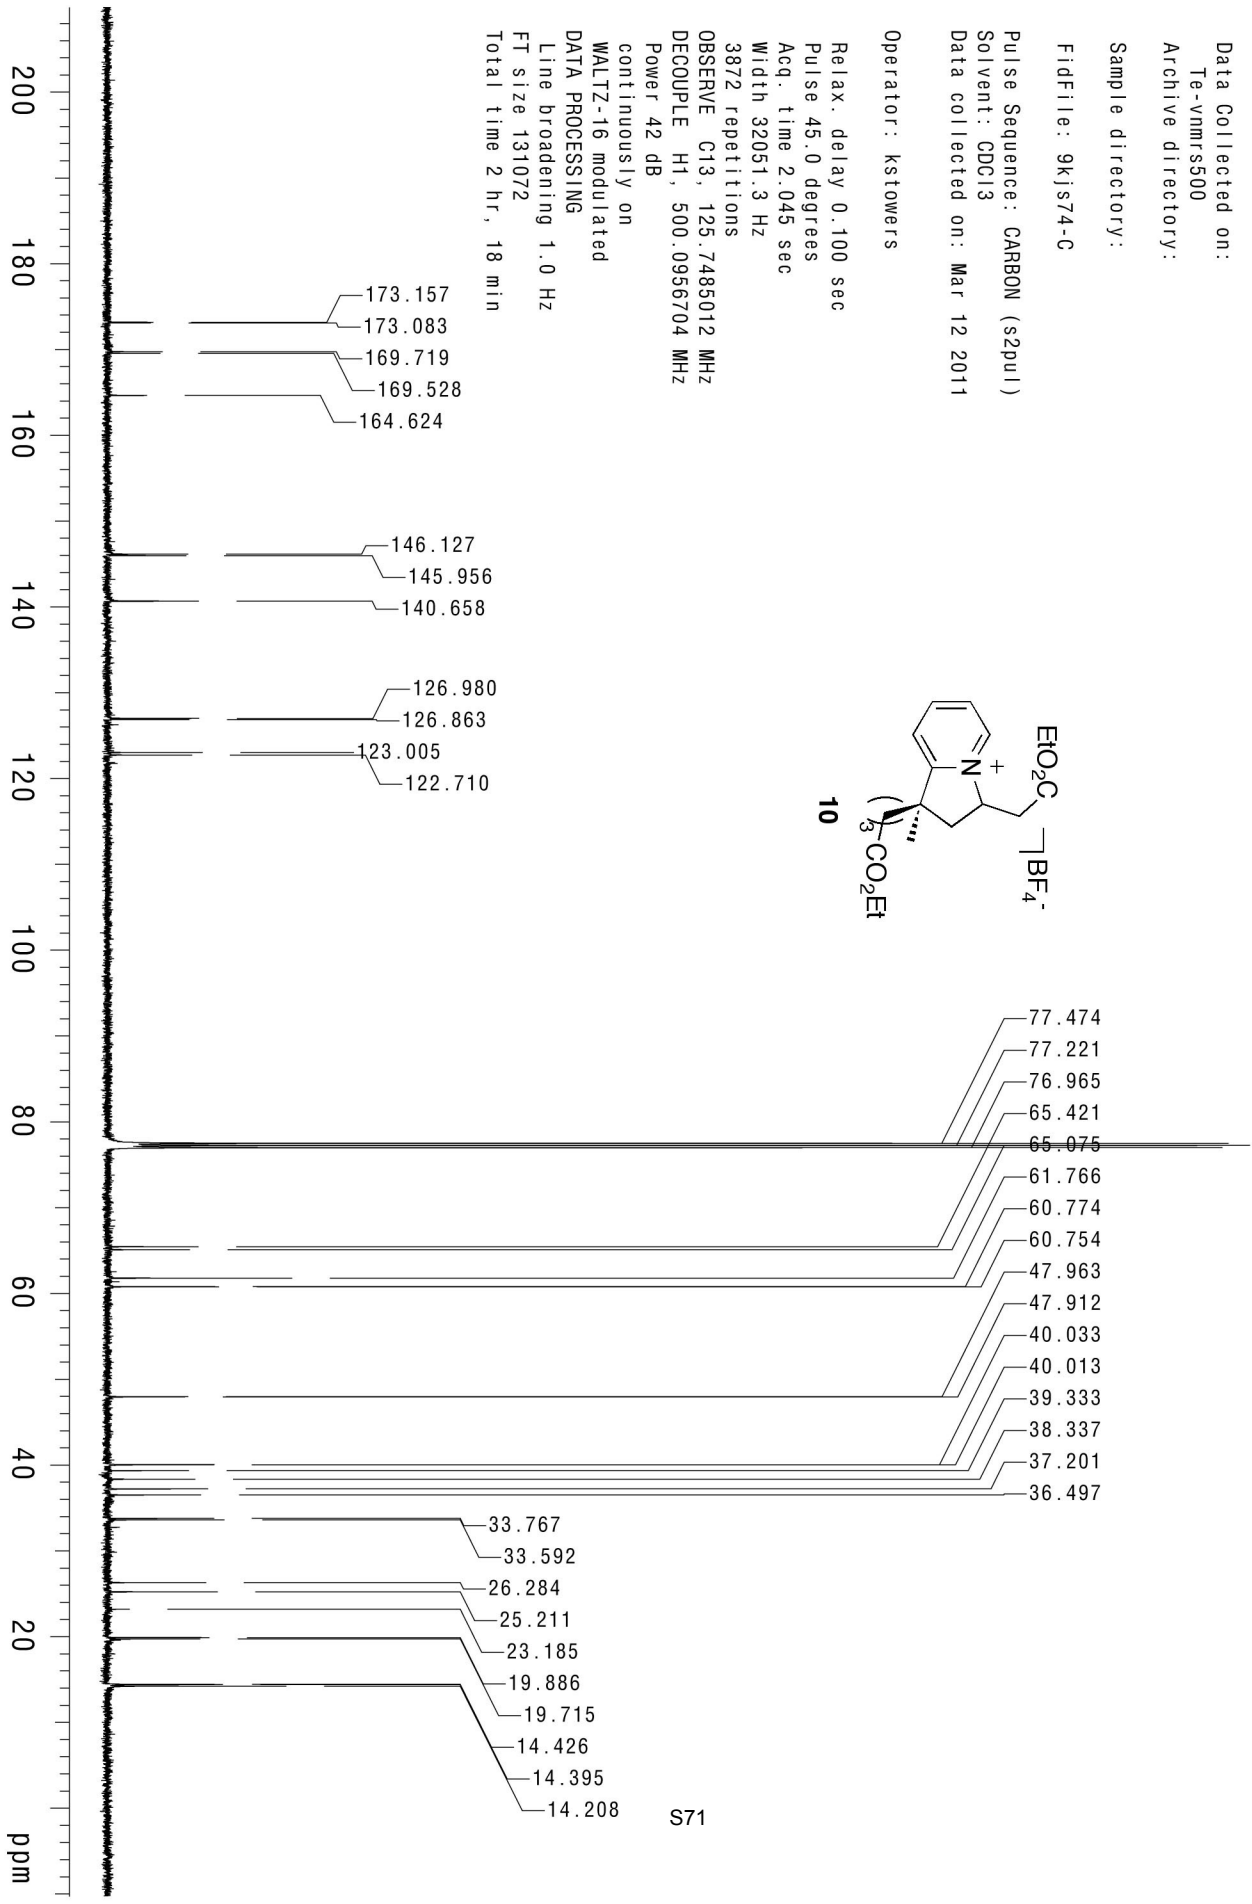

Sample Name :

Data Collected on:  
Co. Chem. USA. UMich.edu-vnmrs400  
Archive directory:

Sample directory:

Fidfile: 9kjs53-1F

Pulse Sequence: FLUORINE (s2pul)  
Solvent: cdcl3  
Data collected on: Jan 31 2011

Operator: kstowers

Relax. delay 1.000 sec  
Pulse 30.0 degrees  
Acq. time 0.734 sec  
Width 89285.7 Hz  
16 repetitions  
OBSERVE F19, 376.8659339 MHz  
DATA PROCESSING  
Line broadening 1.5 Hz  
FT size 131072  
Total time 0 min 31 sec

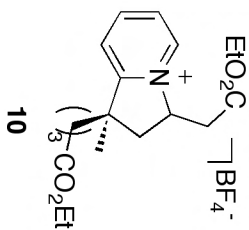

-151.969

-151.918

Sample Name :

Data Collected on :  
Ga. Chem. USA. UMich. edu -vnmr400  
Archive directory :

Sample directory :

Fidfile : 9kjs4xquin-1

Pulse Sequence : PROTON (s2pu1)

Solvent : cdcl3

Data collected on : Jan 26 2011

Operator : kstowers

Relax. delay 0.500 sec

Pulse 45.0 degrees

Acq. time 3.500 sec

Width 6410.3 Hz

16 repetitions

OBSERVE H1, 399.5389153 MHz

DATA PROCESSING

Line broadening 0.3 Hz

FT size 65536

Total time 1 min 12 sec

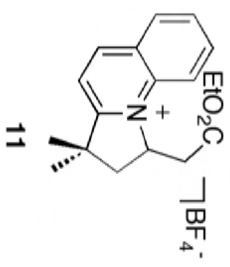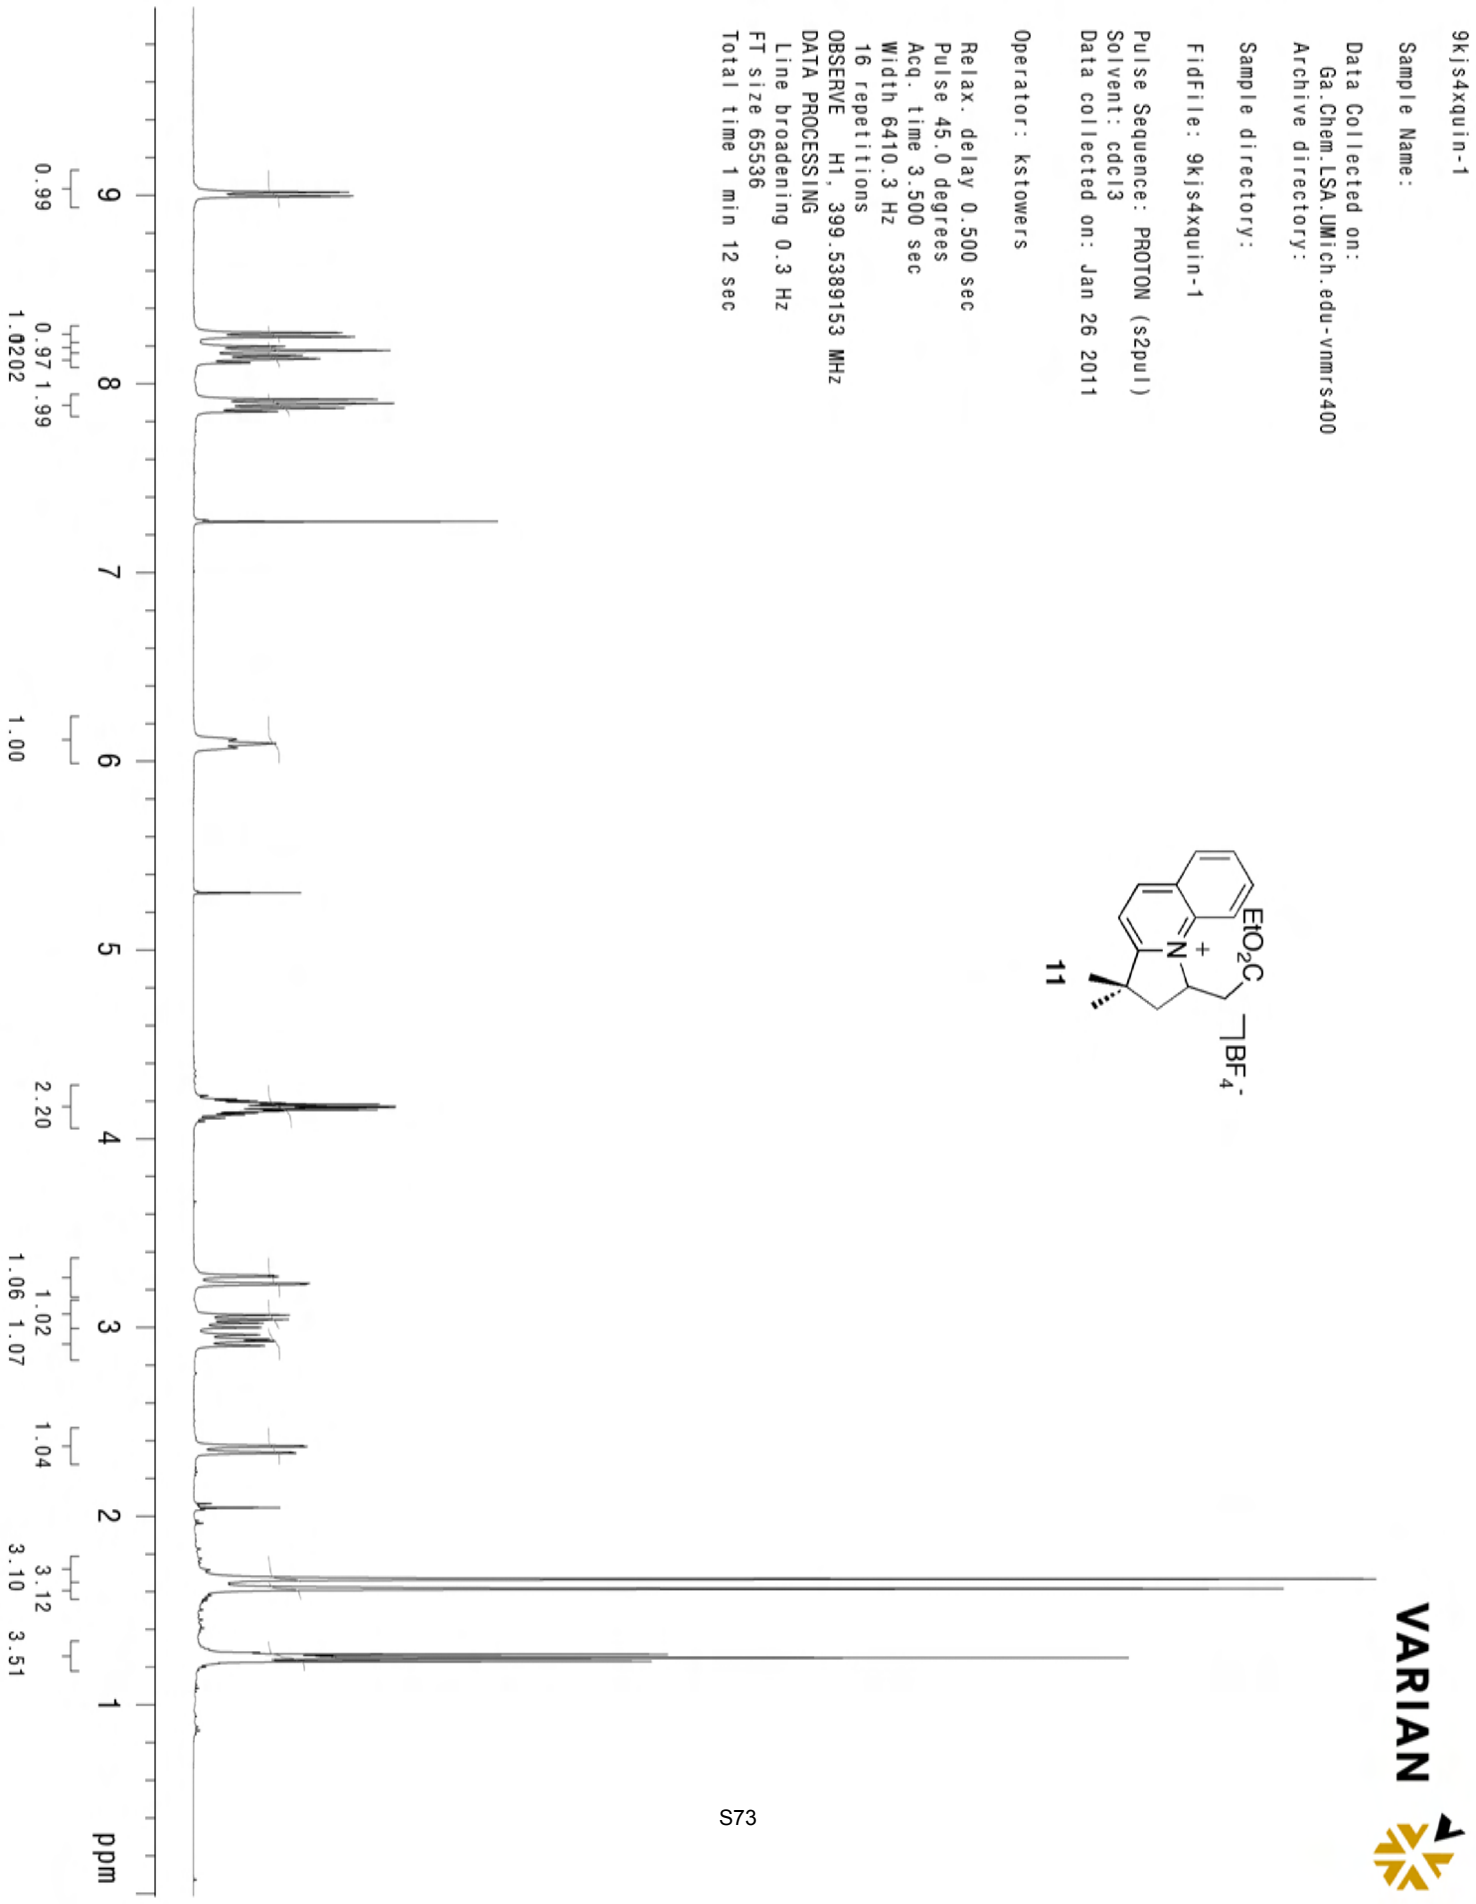

Sample Name :

Data Collected on:  
Co. Chem. USA. UMich. edu - vnmr-s400  
Archive directory:

Sample directory :

Fidfile : 8k1st57-C

Pulse Sequence: CARBON (szpu1)  
Solvent: cdcl3  
Data collected on: Dec 19 2010

Operator : kstowers

Relax. delay 0.100 sec  
Pulse 45.0 degrees  
Acq. time 2.569 sec  
Width 25510.2 Hz  
1248 repetitions  
OBSERVE C13, 100.7109719 MHz  
DECOUPLE H1, 400.5226414 MHz  
Power 41 dB  
continuously on  
WALTZ-16 modulated  
DATA PROCESSING  
Line broadening 1.0 Hz  
FT size 131072  
Total time 55 min

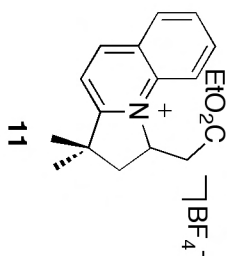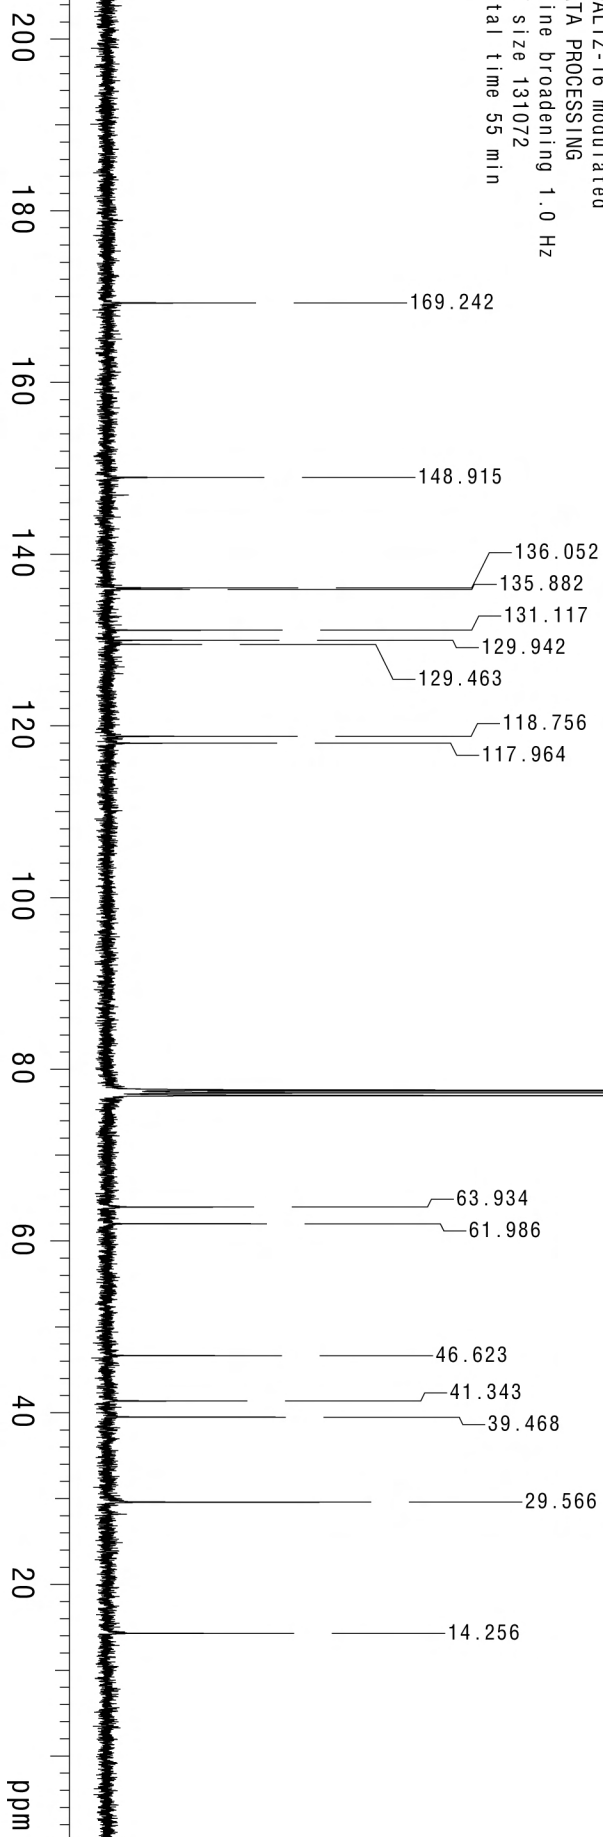

Sample Name :

Data Collected on :  
Co. Chem. USA. UMich. edu -vnmr-s400  
Archive directory:

Sample directory:

Fidfile: 8k1s157-F

Pulse Sequence: FLUORINE (s2pul)

Solvent: cdcl3

Data collected on: Feb 2 2011

Temp. 25.0 C / 298.1 K

Operator: kstowers

Relax. delay 1.000 sec

Pulse 30.0 degrees

Acq. time 0.734 sec

Width 89285.7 Hz

16 repetitions

OBSERVE F19, 376.8659339 MHz

DATA PROCESSING

Line broadening 1.5 Hz

FT size 131072

Total time 0 min 31 sec

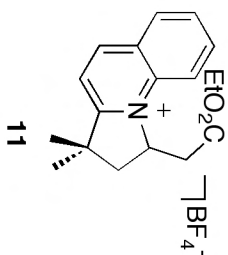

-153.216

-153.270

20 0 -20 -40 -60 -80 -100 -120 -140 -160 -180 ppm

Sample Name :

Data Collected on:  
Ga. Chem. USA. Umich. edu - vnmr-s400  
Archive directory:

Sample directory:

Fidfile: 8k1s116-H

Pulse Sequence: PROTON (szpu1)  
Solvent: cdcl3  
Data collected on: Oct 23 2010

Operator: kstowers

Relax. delay 0.500 sec  
Pulse 45.0 degrees  
Acq. time 3.500 sec  
Width 6410.3 Hz  
8 repetitions  
OBSERVE H1, 399.5389153 MHz  
DATA PROCESSING  
Line broadening 0.3 Hz  
FT size 65536  
Total time 0 min 40 sec

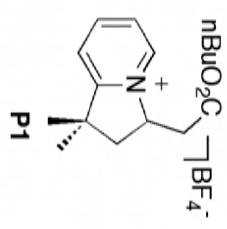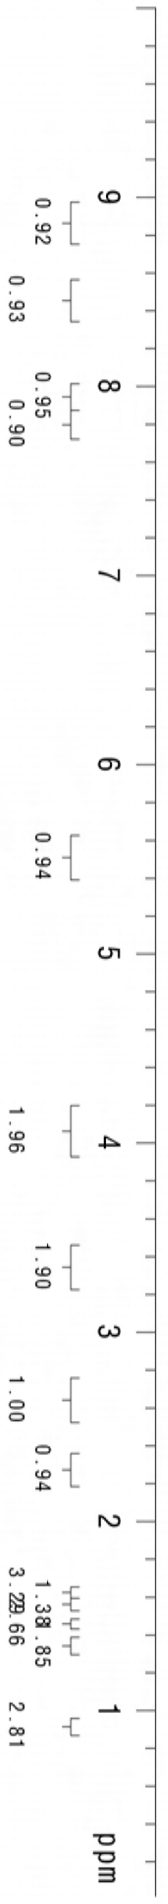



Sample Name :

Data Collected on:  
 Ga. Chem. USA. UMICH.edu-vnmr-s400  
 Archive directory:

Sample directory:

Fidfile: 9kjs77-C

Pulse Sequence: CARBON (szpu1)  
 Solvent: cdcl3  
 Data collected on: Mar 2 2011

Operator: kstowers

Relax. delay 0.100 sec  
 Pulse 45.0 degrees  
 Acq. time 2.569 sec  
 Width 25510.2 Hz  
 592 repetitions  
 OBSERVE C13, 100.4641235 MHz  
 DECOUPLE H1, 399.5409236 MHz  
 Power 35 dB  
 continuously on  
 WALTZ-16 modulated  
 DATA PROCESSING  
 Line broadening 1.0 Hz  
 FT size 131072  
 Total time 26 min

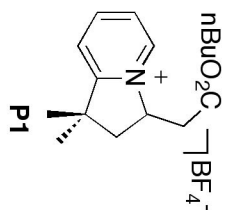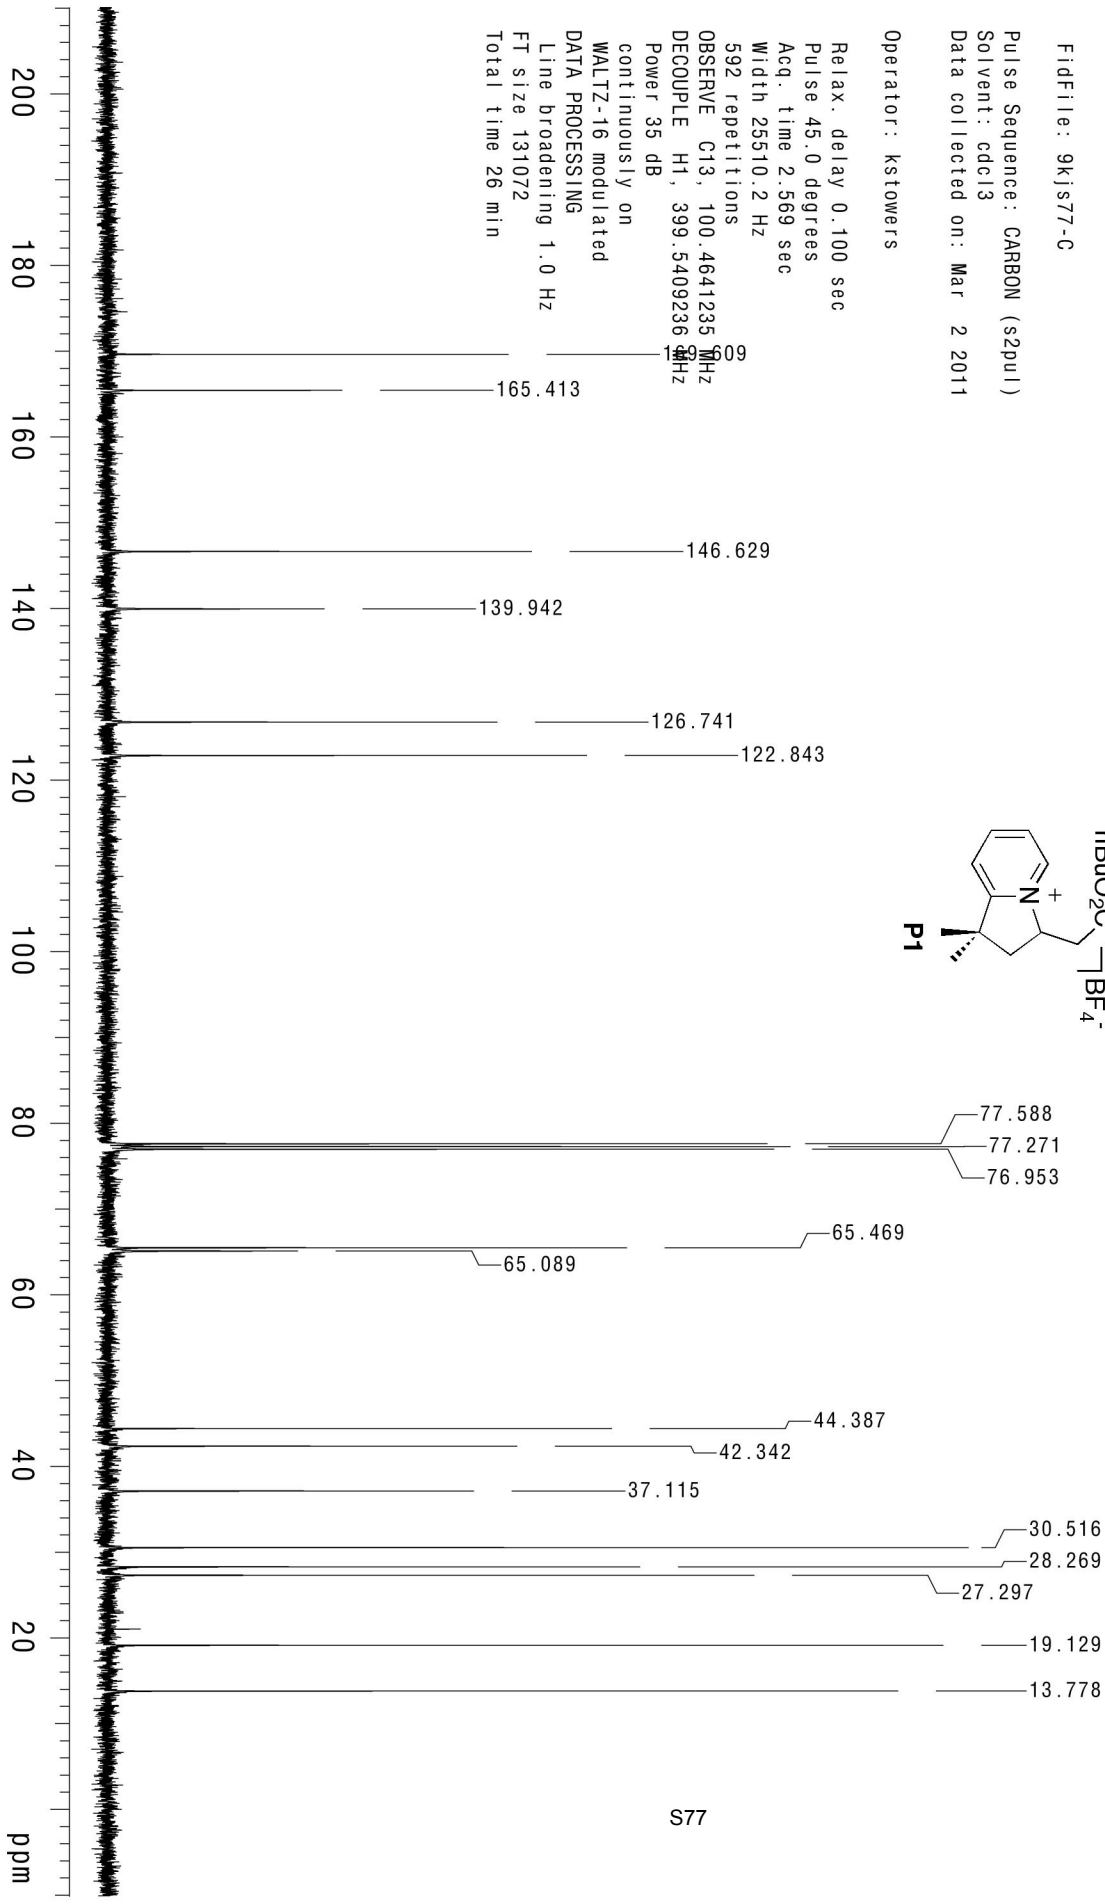

Sample Name :

Data Collected on :  
Co. Chem. USA. UMich .edu -vnmr-s400  
Archive directory :

Sample directory :

Fidfile : 9kjsnBu-F

Pulse Sequence : FLUORINE (s2pul)  
Solvent : cdcl3  
Data collected on : Jan 13 2011

Operator : kstowers

Relax. delay 1.000 sec  
Pulse 30.0 degrees  
Acq. time 0.734 sec  
Width 89285.7 Hz  
16 repetitions  
OBSERVE F19, 376.8659339 MHz  
DATA PROCESSING  
Line broadening 1.5 Hz  
FT size 131072  
Total time 0 min 31 sec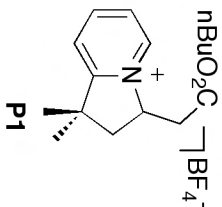

-152.566

-152.511

S78

20 0 -20 -40 -60 -80 -100 -120 -140 -160 -180 ppm

Sample Name:

Data Collected on:  
Co. Chem. USA. UMich. edu - vnmr-s400  
Archive directory:

Sample directory:

Fidfile: 9kjs0Bn-tst

Pulse Sequence: PROTON (szpu1)  
Solvent: cdcl3  
Data collected on: Jan 13 2011

Operator: kstowers

Relax. delay 0.500 sec  
Pulse 45.0 degrees  
Acq. time 3.500 sec  
Width 6410.3 Hz  
Single scan  
OBSERVE H1, 400.5206388 MHz  
DATA PROCESSING  
Line broadening 0.3 Hz  
FT size 65536  
Total time 0 min 12 sec

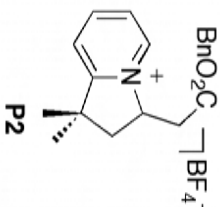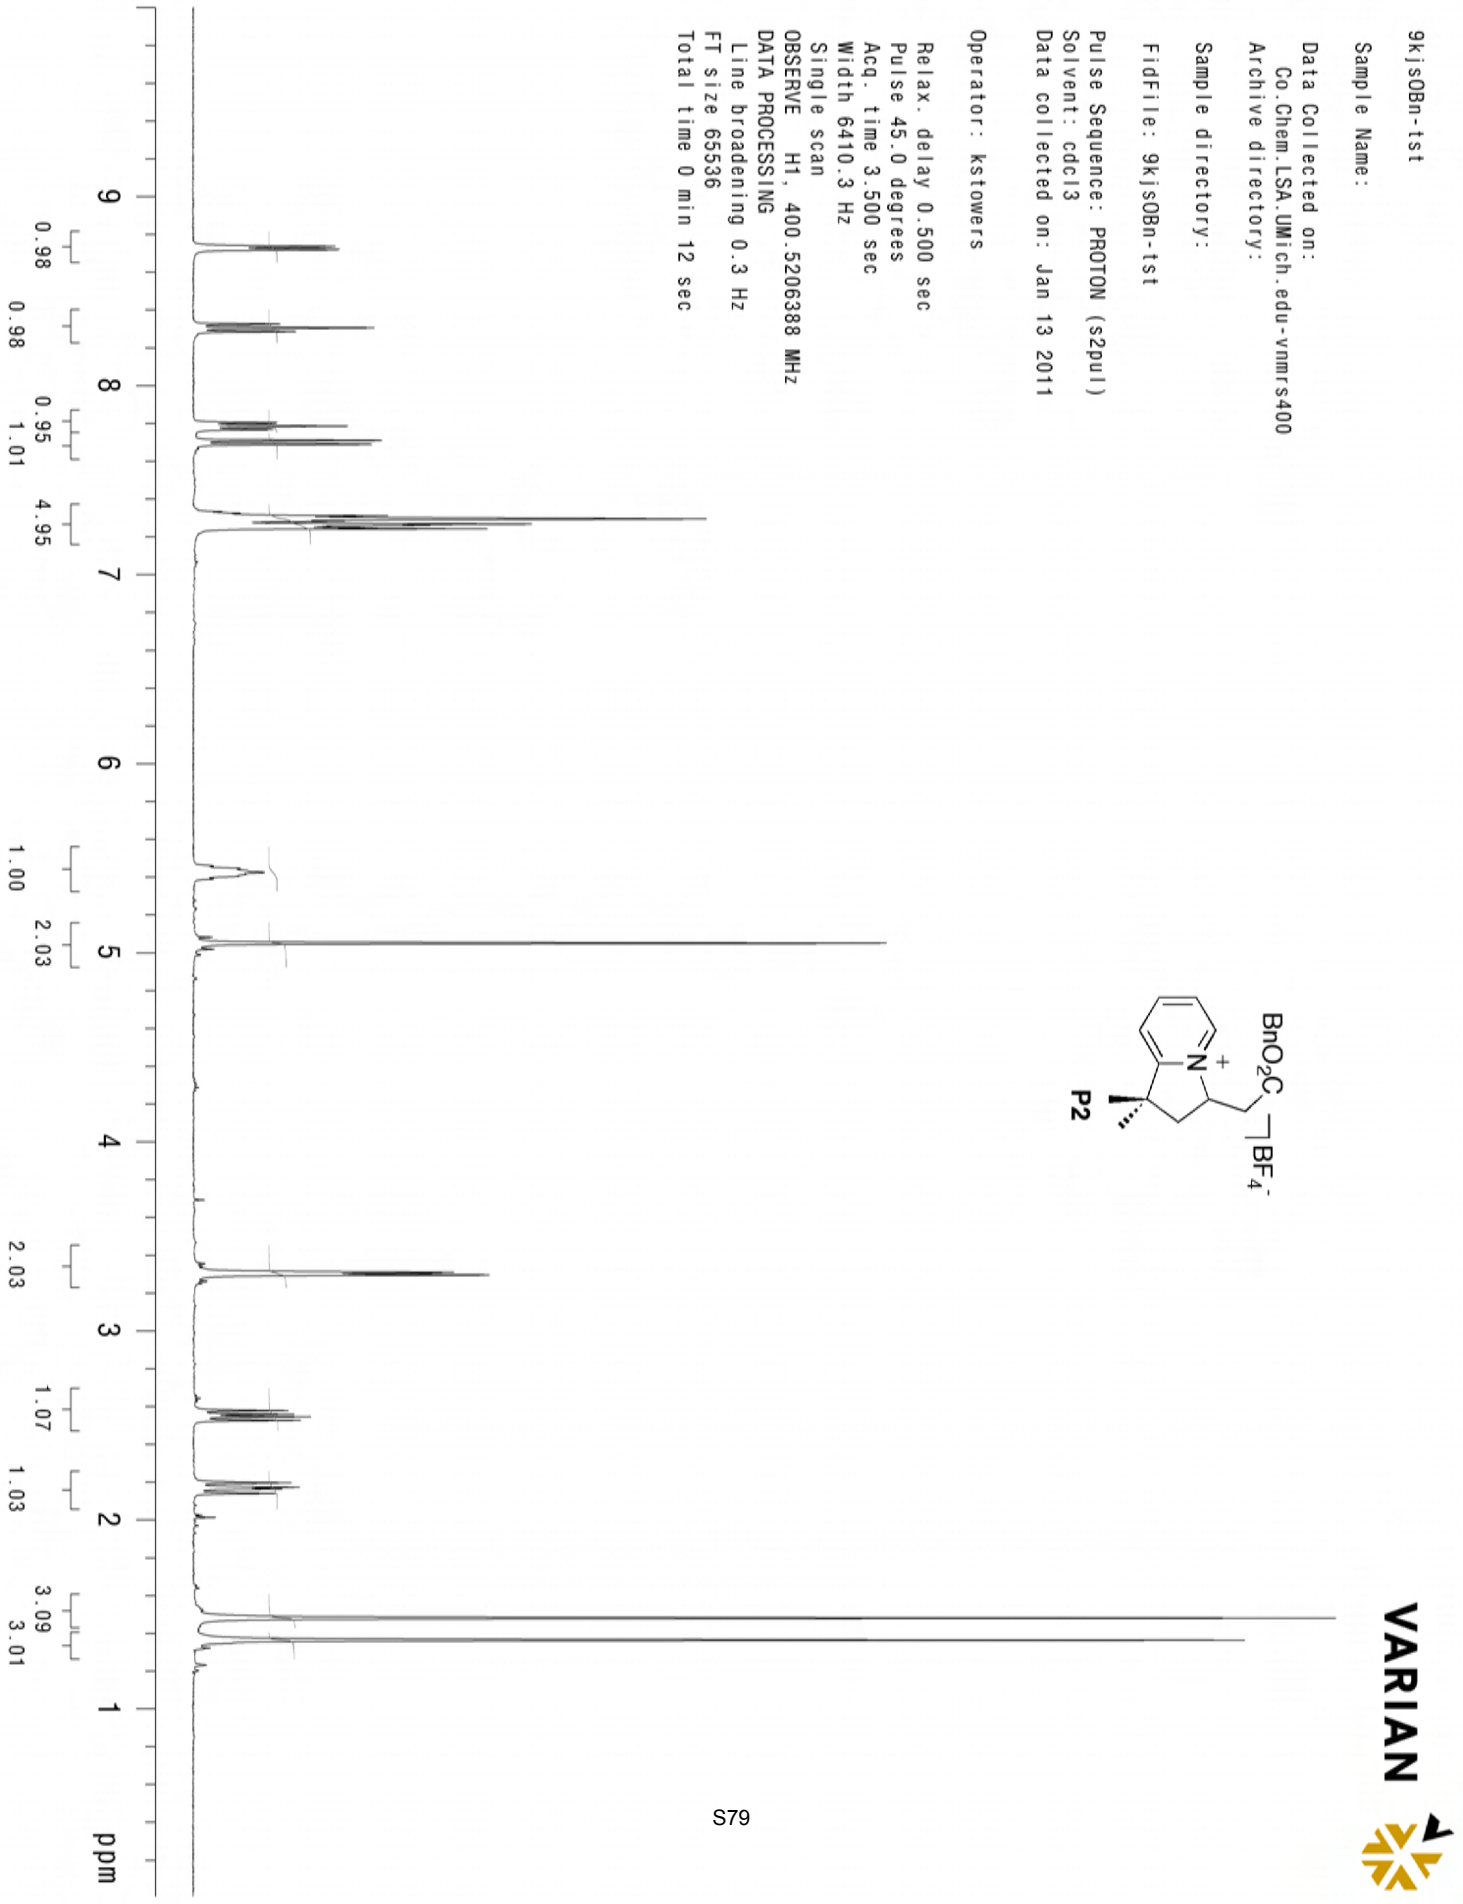

Sample Name :

Data Collected on:  
Co. Chem. USA. UMich. edu -vnmr.s400  
Archive directory:

Sample directory:

Fidfile: 8k1st07-C

Pulse Sequence: CARBON (szpu1)  
Solvent: cdcl3  
Data collected on: Oct 20 2010

Temp. 25.0 C / 298.1 K  
Operator: kstowers

Relax. delay 0.100 sec  
Pulse 45.0 degrees  
Acq. time 2.569 sec  
Width 25510.2 Hz  
912 repetitions  
OBSERVE C13, 100.7109708 MHz  
DECOUPLE H1, 400.5226414 MHz  
Power 41 dB  
continuously on  
WALTZ-16 modulated  
DATA PROCESSING  
Line broadening 1.0 Hz  
FT size 131072  
Total time 40 min

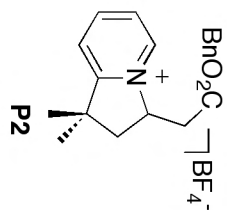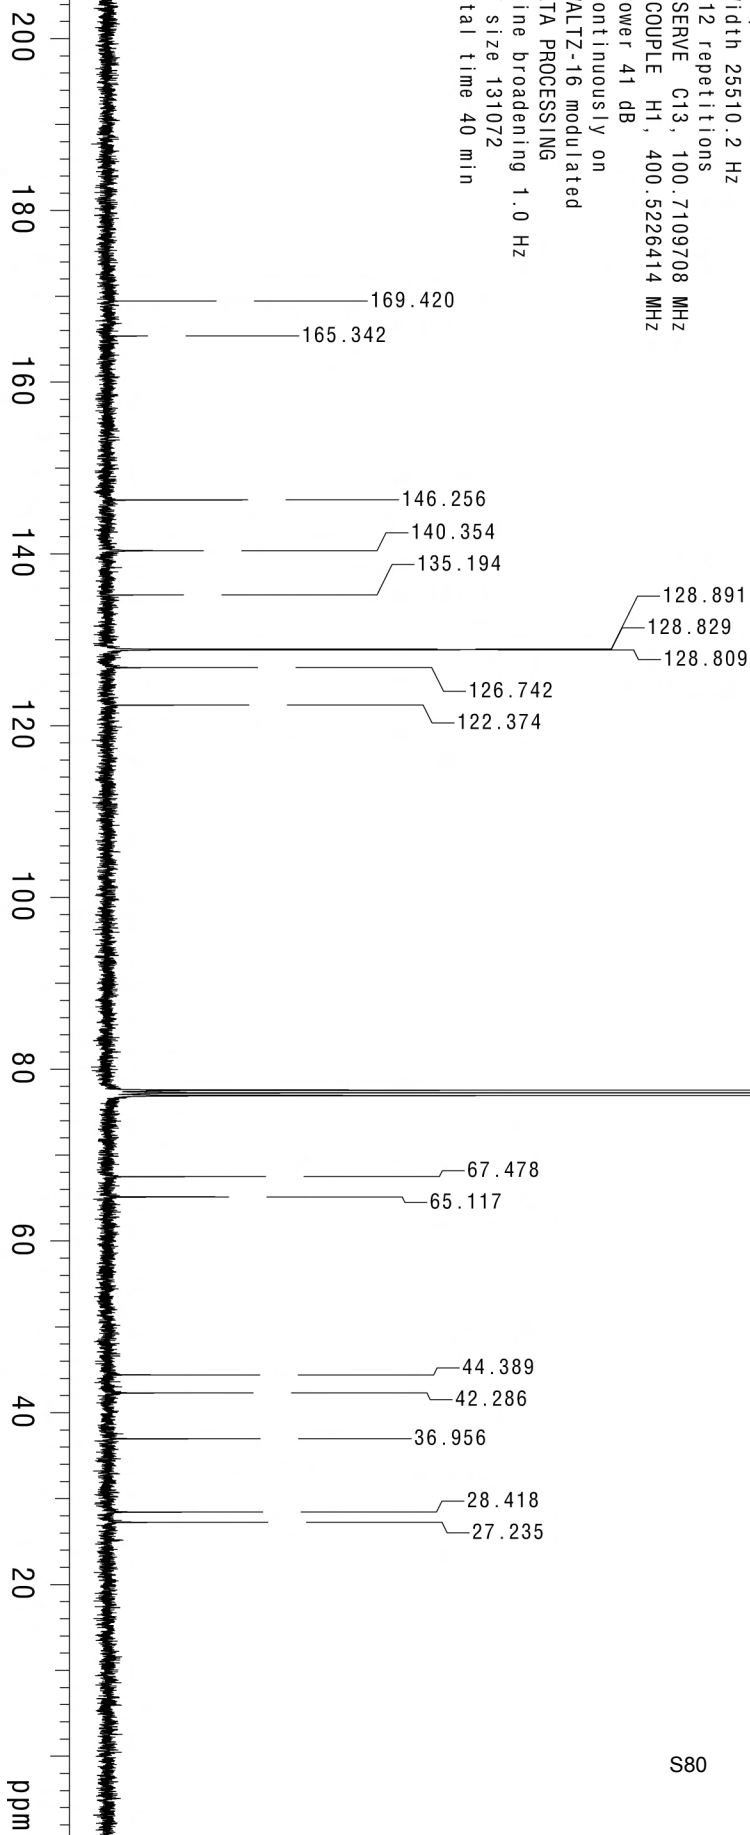

Sample Name :

Data Collected on:  
Co. Chem. USA. UMICH.edu-vnmrs400  
Archive directory:

Sample directory:

Fidfile: 9kjs0Bn-F

Pulse Sequence: FLUORINE (s2pul)  
Solvent: cdcl3  
Data collected on: Jan 13 2011

Operator: kstowers

Relax. delay 1.000 sec  
Pulse 30.0 degrees  
Acq. time 0.734 sec  
Width 89285.7 Hz  
16 repetitions  
OBSERVE F19, 376.8659339 MHz  
DATA PROCESSING  
Line broadening 1.5 Hz  
FT size 131072  
Total time 0 min 31 sec

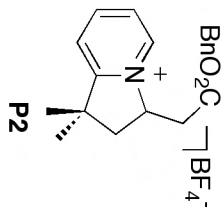

-152.052

-151.998

Sample Name :

Data Collected on :  
Co. Chem. LSA.UMich.edu-vnmrs400  
Archive directory:

Sample directory:

Fidfile: 9kjs75-3

Pulse Sequence: PROTON (szpu1)  
Solvent: cd3od  
Data collected on: Feb 16 2011

Temp. 30.0 C / 303.1 K  
Operator: kstowers

Relax. delay 0.500 sec  
Pulse 45.0 degrees  
Acq. time 3.500 sec  
Width 6410.3 Hz  
16 repetitions  
OBSERVE H1, 400.5222121 MHz  
DATA PROCESSING  
Line broadening 0.3 Hz  
FT size 65536  
Total time 1 min 12 sec

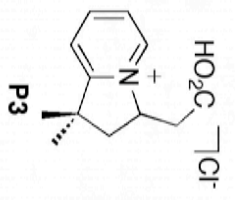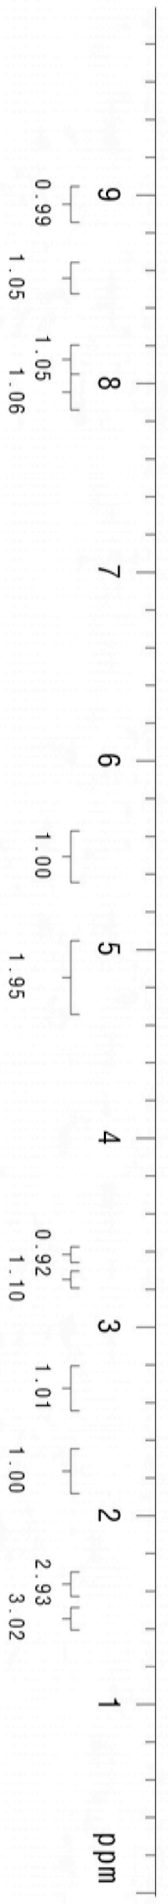

Sample Name :

Data Collected on:  
 Ga. Chem. USA. UMICH.edu-vmrms400  
 Archive directory:

Sample directory:

Fidfile: 9kjs70-2C

Pulse Sequence: CARBON (szpu1)  
 Solvent: cd3od  
 Data collected on: Feb 12 2011

Temp. 31.0 C / 304.1 K  
 Operator: kstowers

Relax. delay 0.100 sec  
 Pulse 45.0 degrees  
 Acq. time 2.569 sec  
 Width 25510.2 Hz  
 1000 repetitions  
 OBSERVE C13, 100.4645386 MHz  
 DECOUPLE H1, 399.5424978 MHz  
 Power 35 dB  
 continuously on  
 WALTZ-16 modulated  
 DATA PROCESSING  
 Line broadening 1.0 Hz  
 FT size 131072  
 Total time 44 min

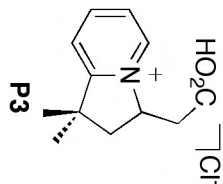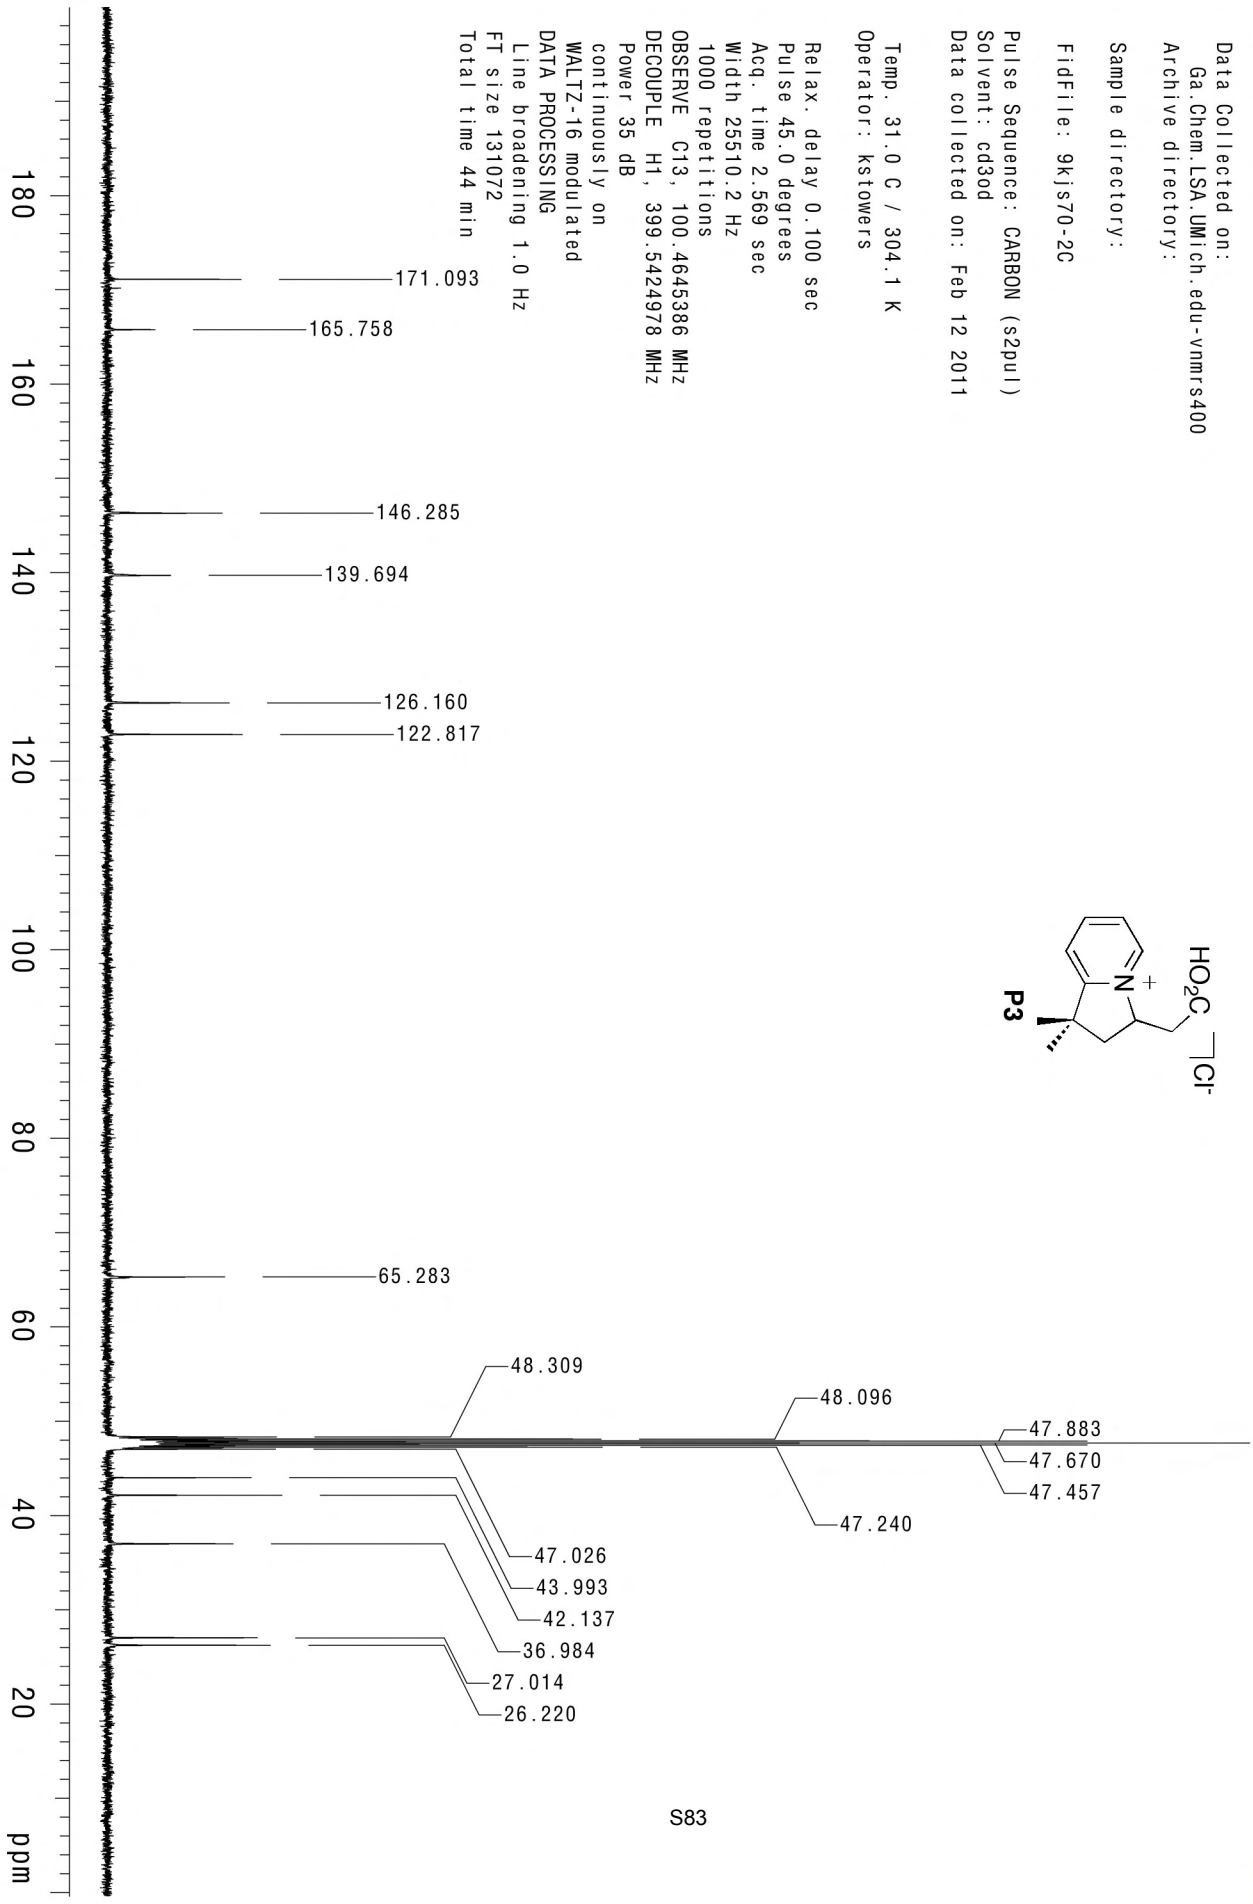

Sample Name :

Data Collected on :  
Ga. Chem. USA. Umich. edu - vnmr-s400  
Archive directory:

Sample directory:

Fidfile: 9kjs59-4

Pulse Sequence: PROTON (s2pul)  
Solvent: cdcl3  
Data collected on: Feb 12 2011

Operator: kstowers

Relax. delay 0.500 sec  
Pulse 45.0 degrees  
Acq. time 3.500 sec  
Width 6410.3 Hz  
16 repetitions  
OBSERVE H1, 399.5389249 MHz  
DATA PROCESSING  
Line broadening 0.3 Hz  
FT size 65536  
Total time 1 min 12 sec

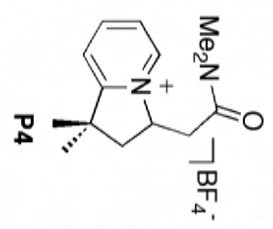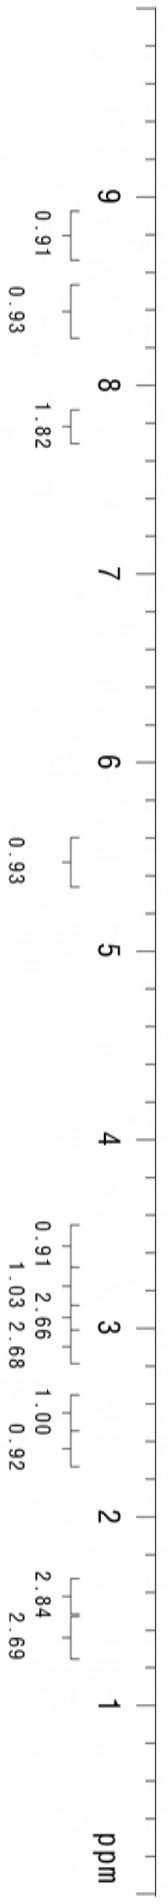



Sample Name :

Data Collected on :  
Ga. Chem. USA. UMich .edu -vnmr5400  
Archive directory:

Sample directory :

Fidfile : 9kjs59-4C

Pulse Sequence: CARBON (szpu1)  
Solvent: cdcl3  
Data collected on: Feb 12 2011

Operator : kstowers

Relax. delay 0.100 sec  
Pulse 45.0 degrees  
Acq. time 2.569 sec  
Width 25510.2 Hz  
896 repetitions  
OBSERVE C13, 100.4641244 MHz  
DECOUPLE H1, 399.5409236 MHz  
Power 35 dB  
continuously on  
WALTZ-16 modulated  
DATA PROCESSING  
Line broadening 1.0 Hz  
FT size 131072  
Total time 39 min

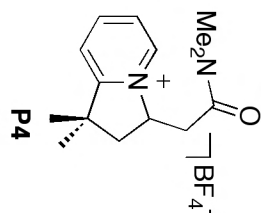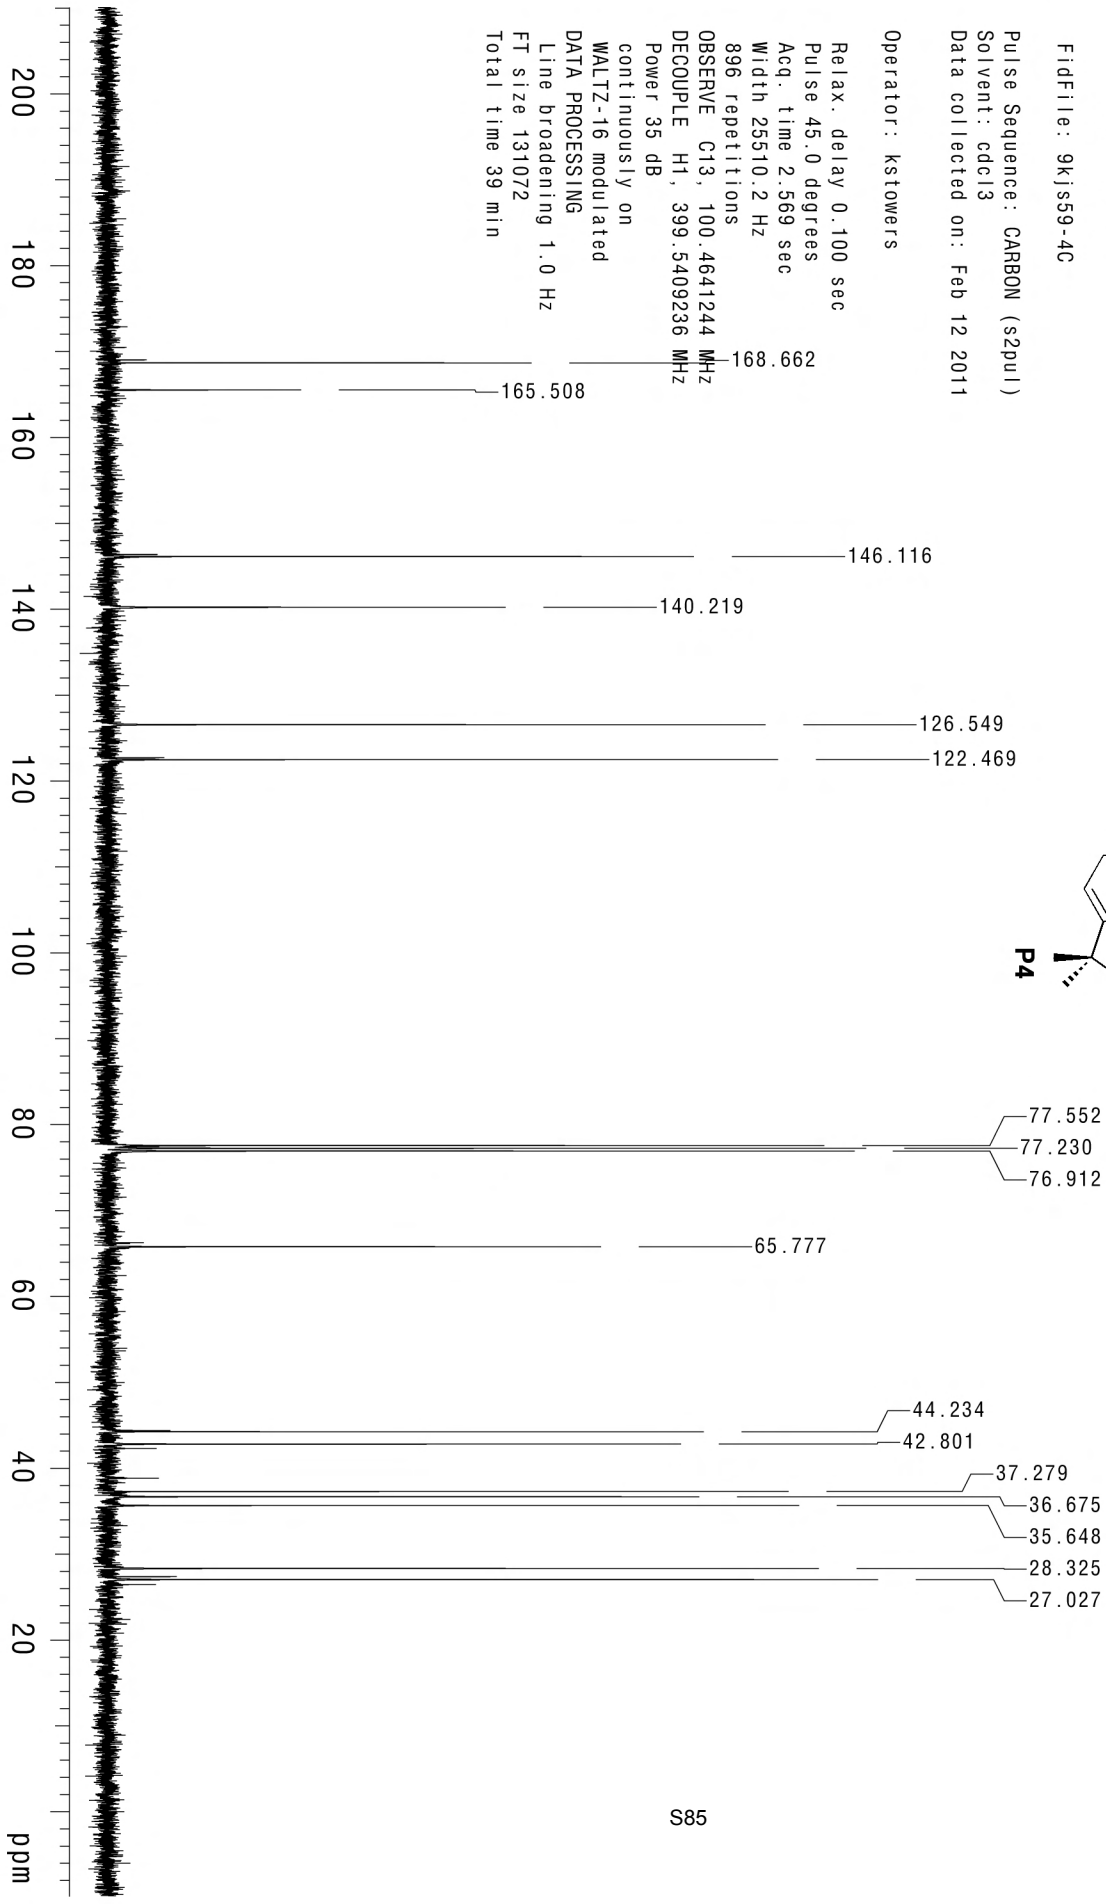

9kjs27-1F

Sample Name :

Data Collected on:  
Co. Chem. USA. UMICH .edu -vnmrs400  
Archive directory:

Sample directory:

Fidfile: 9kjs27-1F

Pulse Sequence: FLUORINE (s2pul)  
Solvent: cdcl3  
Data collected on: Jan 31 2011

Operator: kstowers

Relax. delay 1.000 sec  
Pulse 30.0 degrees  
Acq. time 0.734 sec  
Width 89285.7 Hz  
16 repetitions  
OBSERVE F19, 376.8659339 MHz  
DATA PROCESSING  
Line broadening 1.5 Hz  
FT size 131072  
Total time 0 min 31 sec

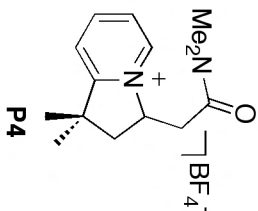

-152.128

-152.074

S86

20 0 -20 -40 -60 -80 -100 -120 -140 -160 -180 ppm

Sample Name :

Data Collected on:  
Ga. Chem. USA. Umich. edu-vmrms400  
Archive directory:

Sample directory:

Fidfile: 9kjs60-2

Pulse Sequence: PROTON (szpu1)  
Solvent: cdcl3  
Data collected on: Feb 9 2011

Temp. 31.0 C / 304.1 K  
Operator: kstowers

Relax. delay 0.500 sec  
Pulse 45.0 degrees  
Acq. time 3.500 sec  
Width 6410.3 Hz  
16 repetitions

OBSERVE H1, 399.5389151 MHz  
DATA PROCESSING  
Line broadening 0.3 Hz  
FT size 65536  
Total time 1 min 12 sec

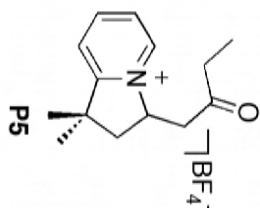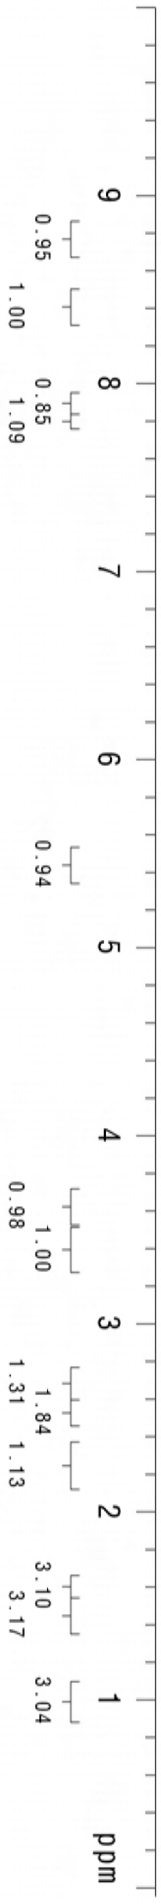

Sample Name:

Data Collected on:  
Ga. Chem. USA. UMICH.edu-vmnms400  
Archive directory:

Sample directory:

Fidfile: 9kjs60-2C

Pulse Sequence: CARBON (szpul)

Solvent: cdcl3

Data collected on: Feb 9 2011

Temp: 31.0 C / 304.1 K

Operator: kstowers

Relax. delay 0.100 sec  
Pulse 45.0 degrees  
Acq. time 2.569 sec  
Width 25510.2 Hz  
832 repetitions  
OBSERVE C13, 100.4641217 MHz  
DECOUPLE H1, 399.5409236 MHz  
Power 35 dB  
continuously on  
WALTZ-16 modulated  
DATA PROCESSING  
Line broadening 1.0 Hz  
FT size 131072  
Total time 37 min

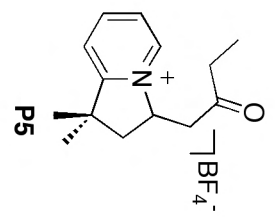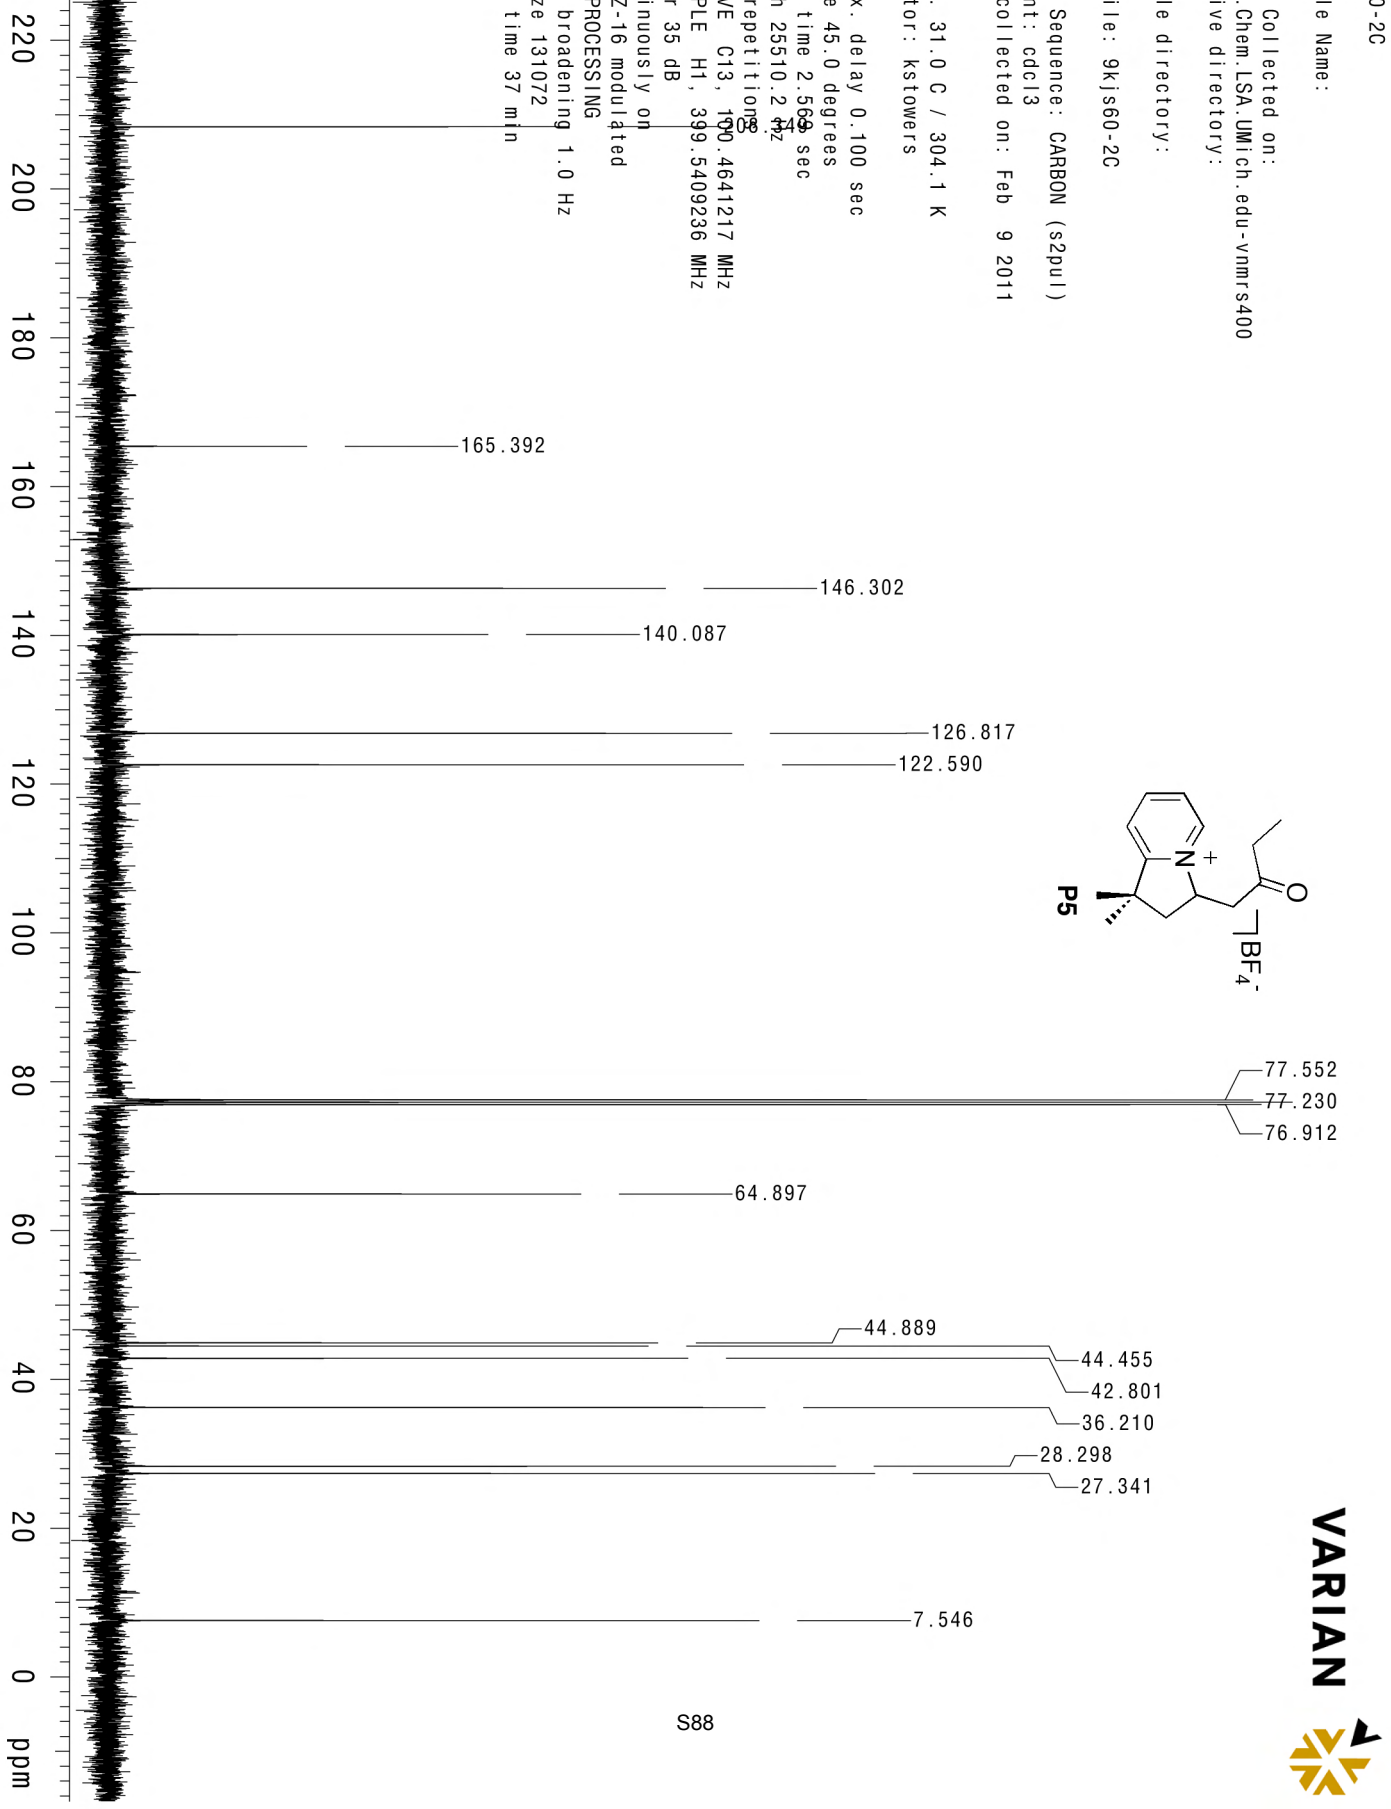

Sample Name :

Data Collected on :  
Co. Chem. USA. UMICH.edu-vnmrs400  
Archive directory :

Sample directory :

Fidfile: 9kjscoet-f

Pulse Sequence: FLUORINE (s2pul)

Solvent: cdcl3

Data collected on: Jan 28 2011

Operator: kstowers

Relax. delay 1.000 sec

Pulse 30.0 degrees

Acq. time 0.734 sec

Width 89285.7 Hz

16 repetitions

OBSERVE F19, 376.8659339 MHz

DATA PROCESSING

Line broadening 1.5 Hz

FT size 131072

Total time 0 min 31 sec

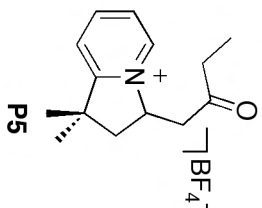

-152.117

-152.168

Automated Probe tuning parameter

Sample Name:

Data Collected on:  
Co.Chem.LSA.UMich.edu-vnmrs400  
Archive directory:

Sample directory:

FIDfile: KCF-3-123-1H

Pulse Sequence: PROTON (s2pul)  
Solvent: GDC13  
Data collected on: Dec 18 2010

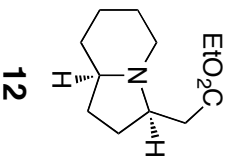

Operator: kfortner

Relax. delay 0.500 sec  
Pulse 45.0 degrees  
Acq. time 3.500 sec  
Width 6410.8 Hz  
32 repetitions  
OBSERVE H1 400.5206316 MHz  
DATA PROCESS MG  
Line broadening 0.3 Hz  
FT size 65536  
Total time 2 min 16 sec

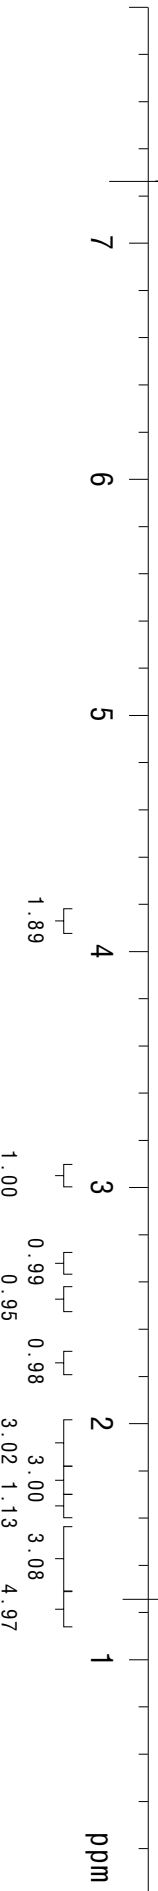

Automated Probe tuning parameter

Sample Name:

Data Collected on:  
Co.Chem.LSA.UMich.edu-vmrms400

Archive directory:

Sample directory:

FIDfile: KCF-3-123-13C  
Pulse Sequence: CARBON (s2pul)  
Solvent: GDC13  
Data collected on: Dec 18 2010

Operator: kfortner

Relax. delay 0.100 sec  
Pulse 45.0 degrees  
Acq. time 2.569 sec  
Width 25510.2 Hz  
128 repetitions  
OBSERVE C13, 100.7109735 MHz  
DECOUPLE H1, 400.5226419 MHz  
Power 41 dB  
continuously on  
WALTZ-16 modulated  
DATA PROCESSING  
Line broadening 1.0 Hz  
FT size 131072  
Total time 5 min 43 sec

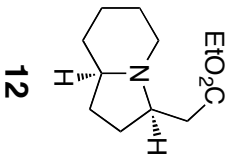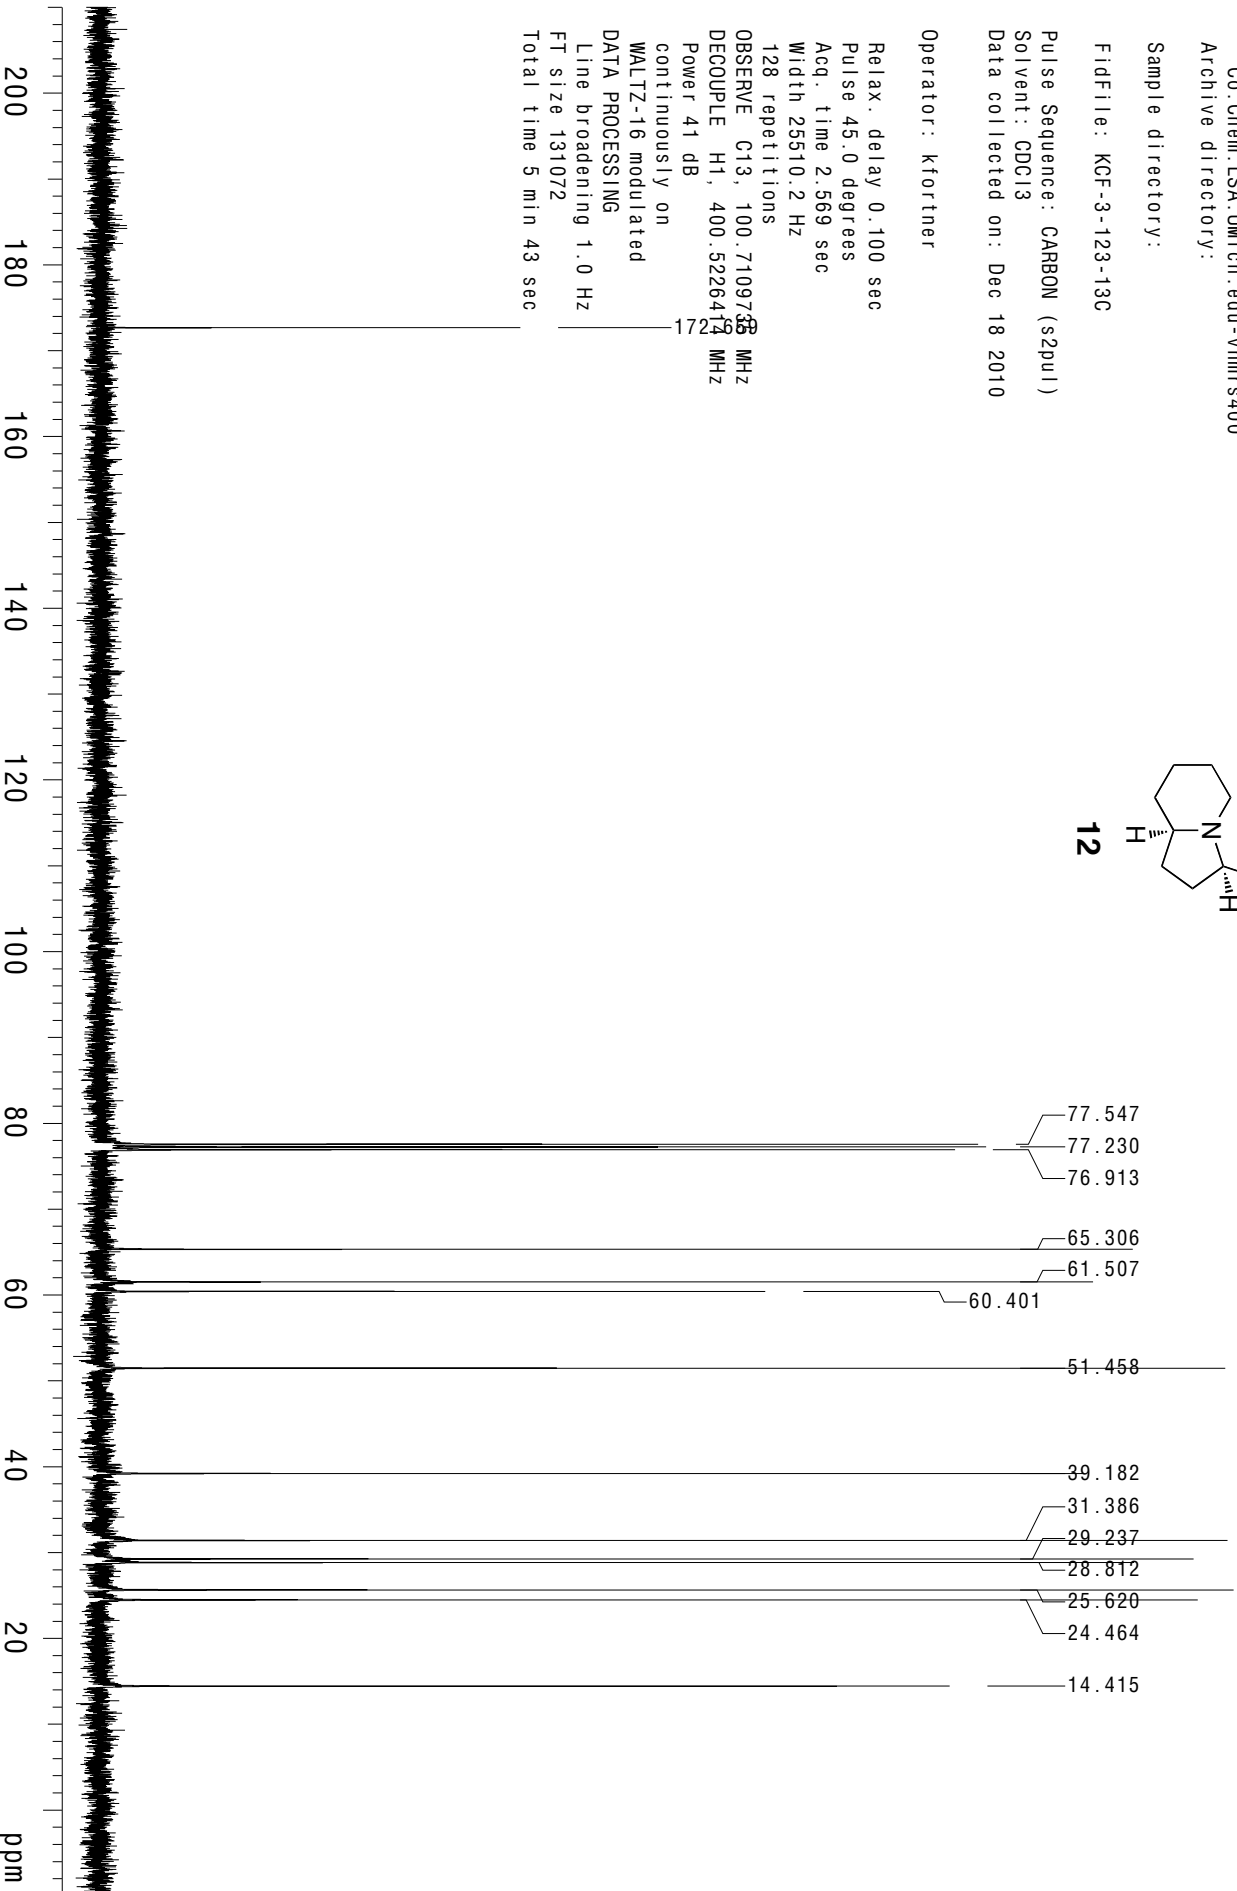

Automated Probe tuning parameter

Sample Name:

Data Collected on:  
Co.Chem.LSA.UMich.edu-vmr400  
Archive directory:

Sample directory:

FIDfile: KCF-3-125-1H

Pulse Sequence: PROTON (s2pul)  
Solvent: GDC13  
Data collected on: Dec 19 2010

Operator: kfortner

Relax. delay 0.500 sec  
Pulse 45.0 degrees  
Acq. time 3.500 sec  
Width 6410.3 Hz  
16 repetitions  
OBSERVE H1, 400.5206318 MHz  
DATA PROCESSING  
Line broadening 0.3 Hz  
FT size 65536  
Total time 1 min 12 sec

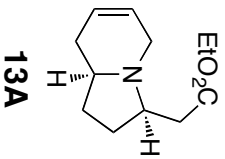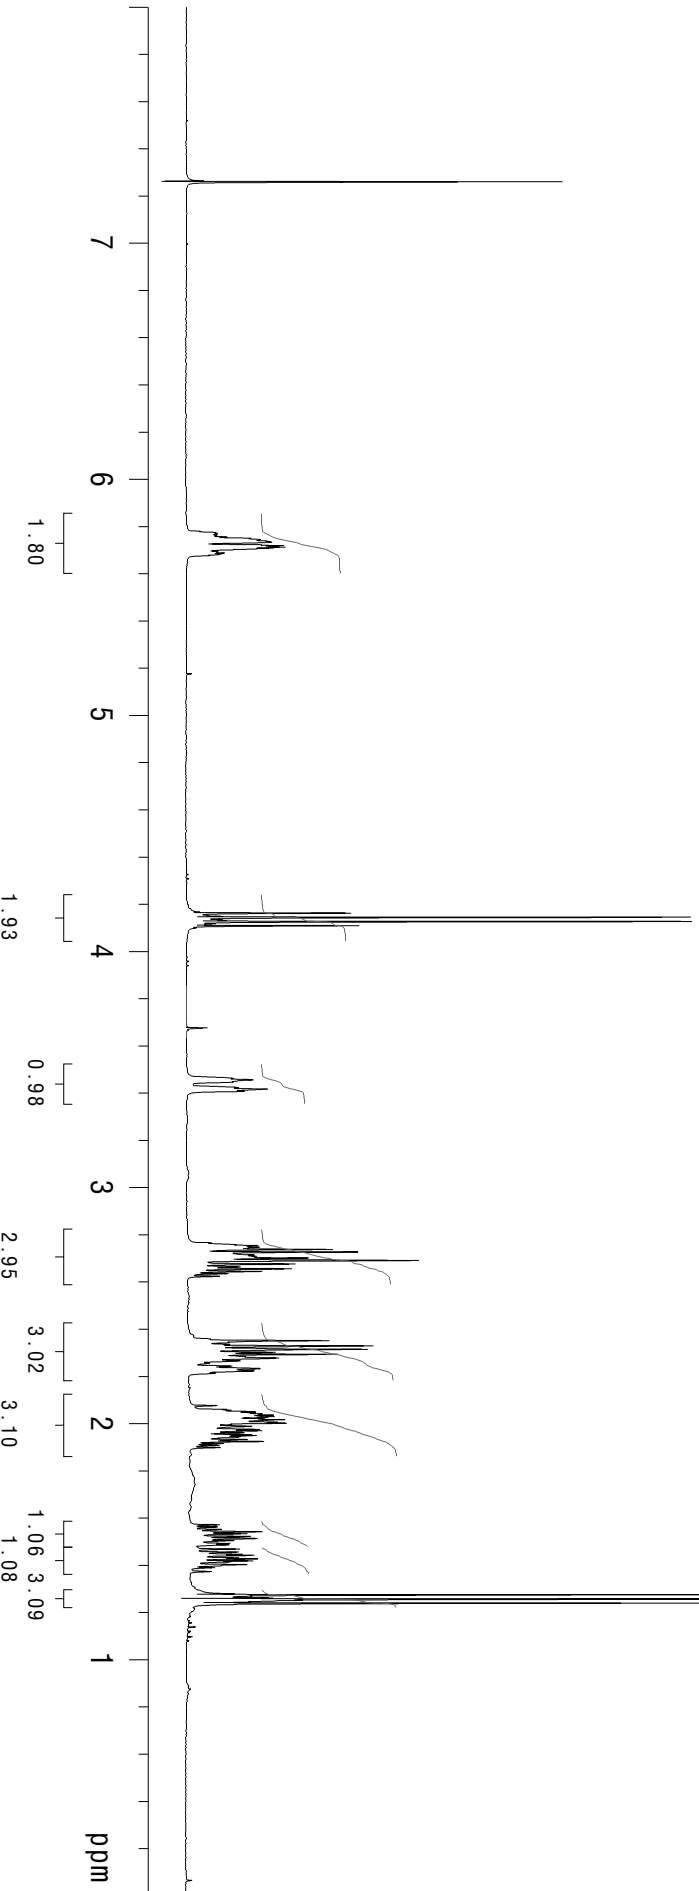



Automated Probe tuning parameter

Sample Name:

Data Collected on:  
Co.Chem.LSA.UMich.edu-vmrms400

Archive directory:

Sample directory:

FIDfile: KCF-3-125-13C  
Pulse Sequence: CARBON (s2pul)  
Solvent: GDC13  
Data collected on: Dec 21 2010

Operator: kfortner

Relax. delay 0.100 sec  
Pulse 45.0 degrees  
Acq. time 2.569 sec  
Width 25510.2 Hz  
2176 repetitions  
OBSERVE C13, 100.7109708 MHz  
DECOUPLE H1, 400.5226414 MHz  
Power 41 dB  
continously on  
WALTZ-16 modulated  
DATA PROCESSING  
Line broadening 1.0 Hz  
FT size 131072  
Total time 1 hr, 37 min

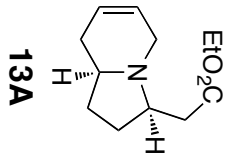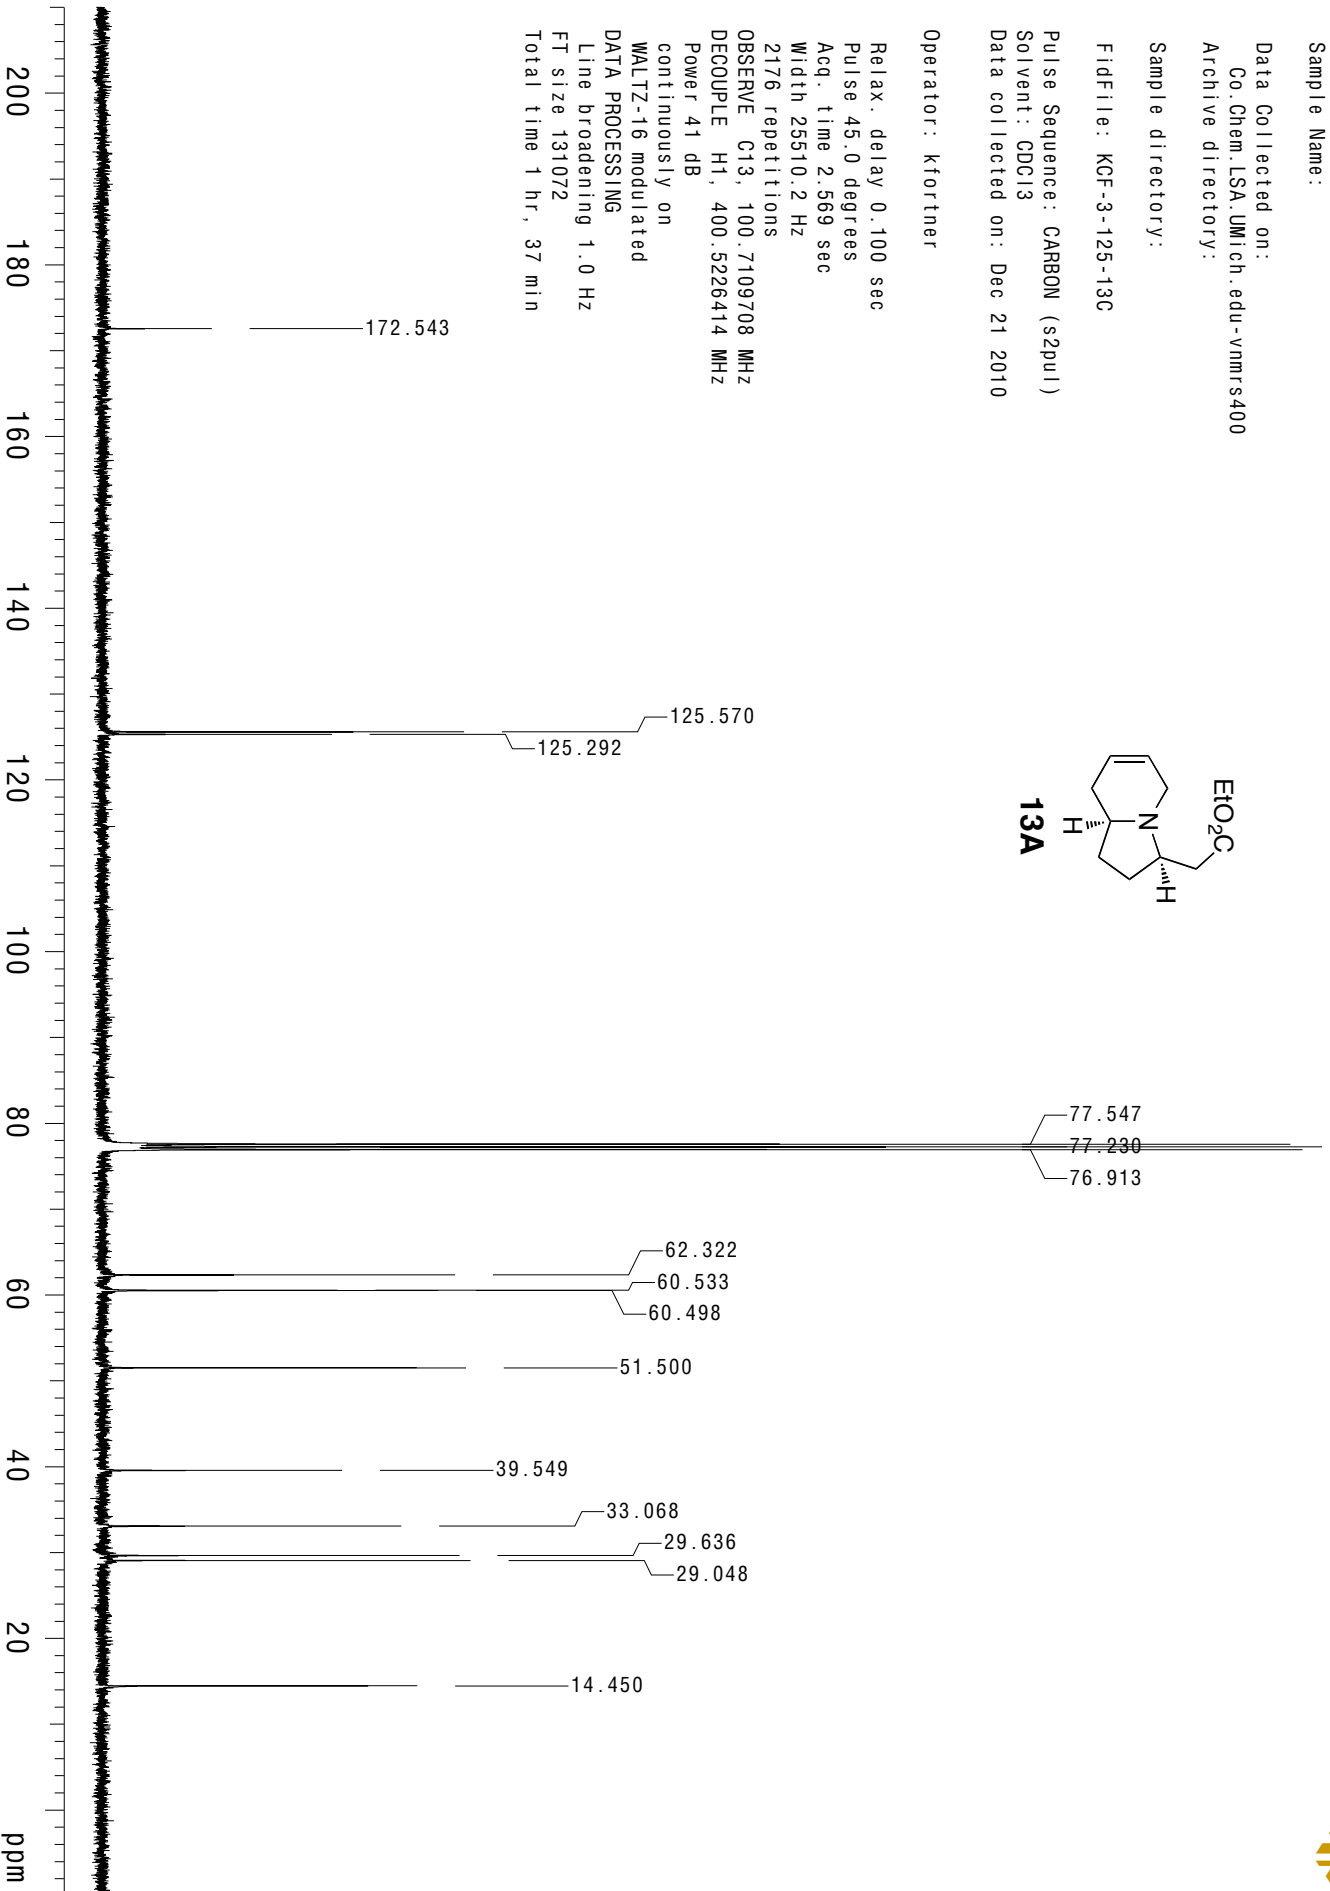

STANDARD 1H OBSERVE

Selective band center: 6.08 (ppm); width: 50.7 (Hz)

Sample Name:

Data Collected on:

Ga.Chem.LSA.UMich.edu-vmr400

Archive directory:

Sample directory:

Fidfile: KCF-3-137-1H

Pulse Sequence: PROTON (s2pul)

Solvent: c6d6

Data collected on: Jan 20 2011

Temp. 23.0 C / 296.1 K

Operator: kfortner

Relax. delay 0.500 sec

Pulse 45.0 degrees

Acq. time 3.500 sec

Width 6410.3 Hz

24 repetitions

OBSERVE H1, 399.5389379 MHz

DATA PROCESSING

Line broadening 0.3 Hz

FT size 65536

Total time 1 min 44 sec

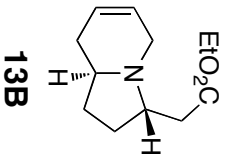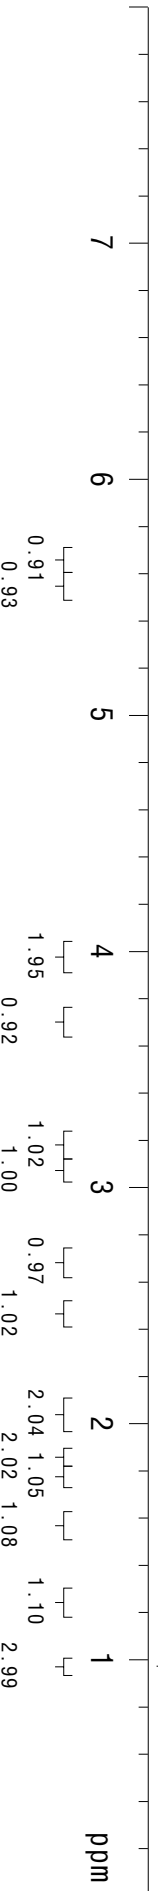

Automated Probe tuning parameter

Sample Name:

Data Collected on:  
Co.Chem.LSA.UMich.edu-vmrms400

Archive directory:

Sample directory:

FIDfile: KCF-3-137-13C  
Pulse Sequence: CARBON (s2pul)  
Solvent: GDC13  
Data collected on: Jan 20 2011

Operator: kfortner

Relax. delay 0.100 sec  
Pulse 45.0 degrees  
Acq. time 2.569 sec  
Width 25510.2 Hz  
2336 repetitions  
OBSERVE C13, 100.7109704 MHz  
DECOUPLE H1, 400.5226414 MHz  
Power 41 dB  
continously on  
WALTZ-16 modulated  
DATA PROCESSING  
Line broadening 1.0 Hz  
FT size 131072  
Total time 1 hr, 44 min

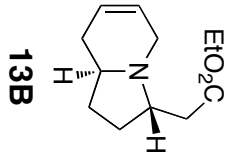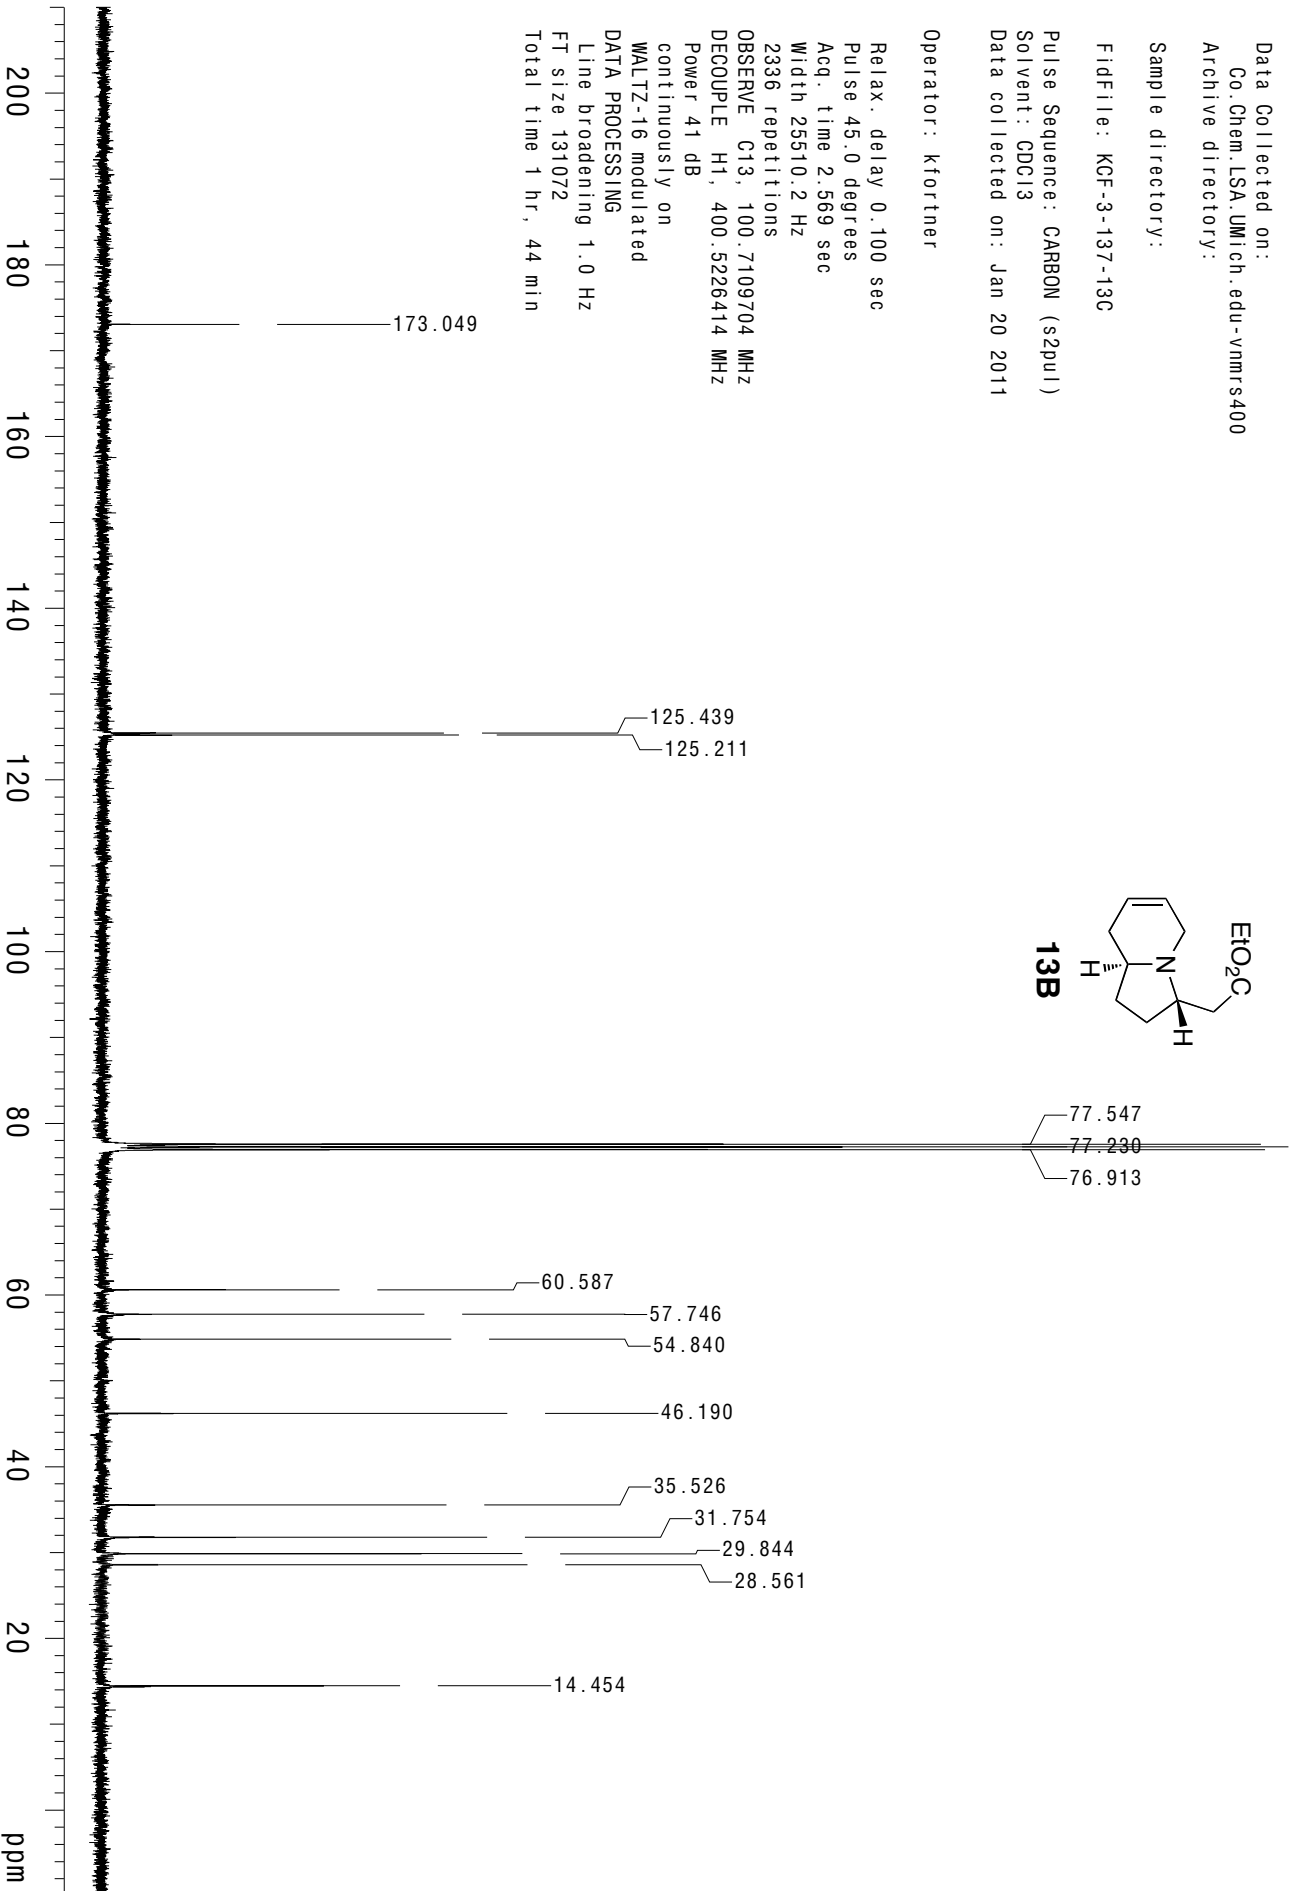

STANDARD 1H OBSERVE

Selective band center: 6.08 (ppm); width: 50.7 (Hz)

Sample Name:

Data Collected on:  
Ga.Chem.LSA.UMich.edu-vmrms400  
Archive directory:

Sample directory:

Fidfile: KCF-3-147-1H

Pulse Sequence: PROTON (s2pu1)  
Solvent: cdcl3  
Data collected on: Feb 6 2011

Operator: kfortner

Relax. delay 0.500 sec  
Pulse 45.0 degrees  
Acq. time 3.500 sec  
Width 6410.3 Hz  
48 repetitions  
OBSERVE H1, 399.5389189 MHz  
DATA PROCESSING  
Line broadening 0.3 Hz  
FT size 65536  
Total time 3 min 20 sec

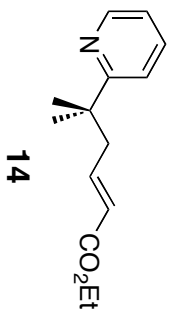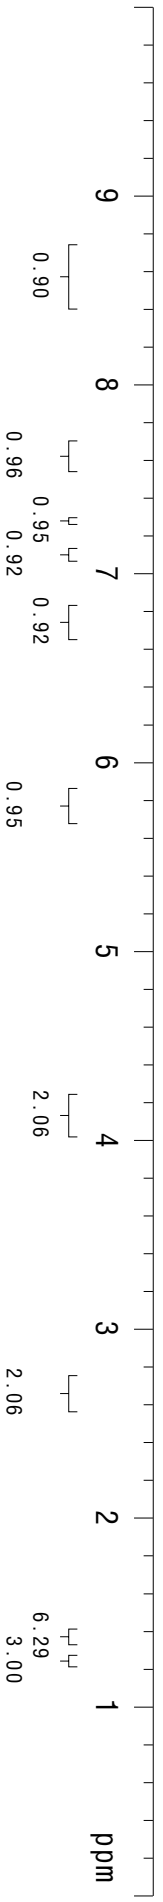

Automated Probe tuning parameter

Sample Name:

Data Collected on:  
Co.Chem.LSA.UMich.edu-vmr400  
Archive directory:

Sample directory:

FIDFile: KCF-3-147-13C2

Pulse Sequence: CARBON (s2pul)  
Solvent: GDC13  
Data collected on: Feb 7 2011

Operator: kfortner

Relax. delay 0.100 sec  
Pulse 45.0 degrees  
Acq. time 2.569 sec  
Width 25510.2 Hz  
2448 repetitions  
OBSERVE C13, 100.7109708 MHz  
DECOUPLE H1, 400.5226414 MHz  
Power 41 dB  
continously on  
WALTZ-16 modulated  
DATA PROCESSING  
Line broadening 1.0 Hz  
FT size 131072  
Total time 1 hr, 49 min

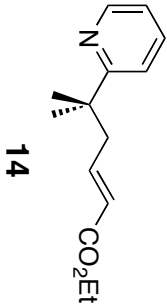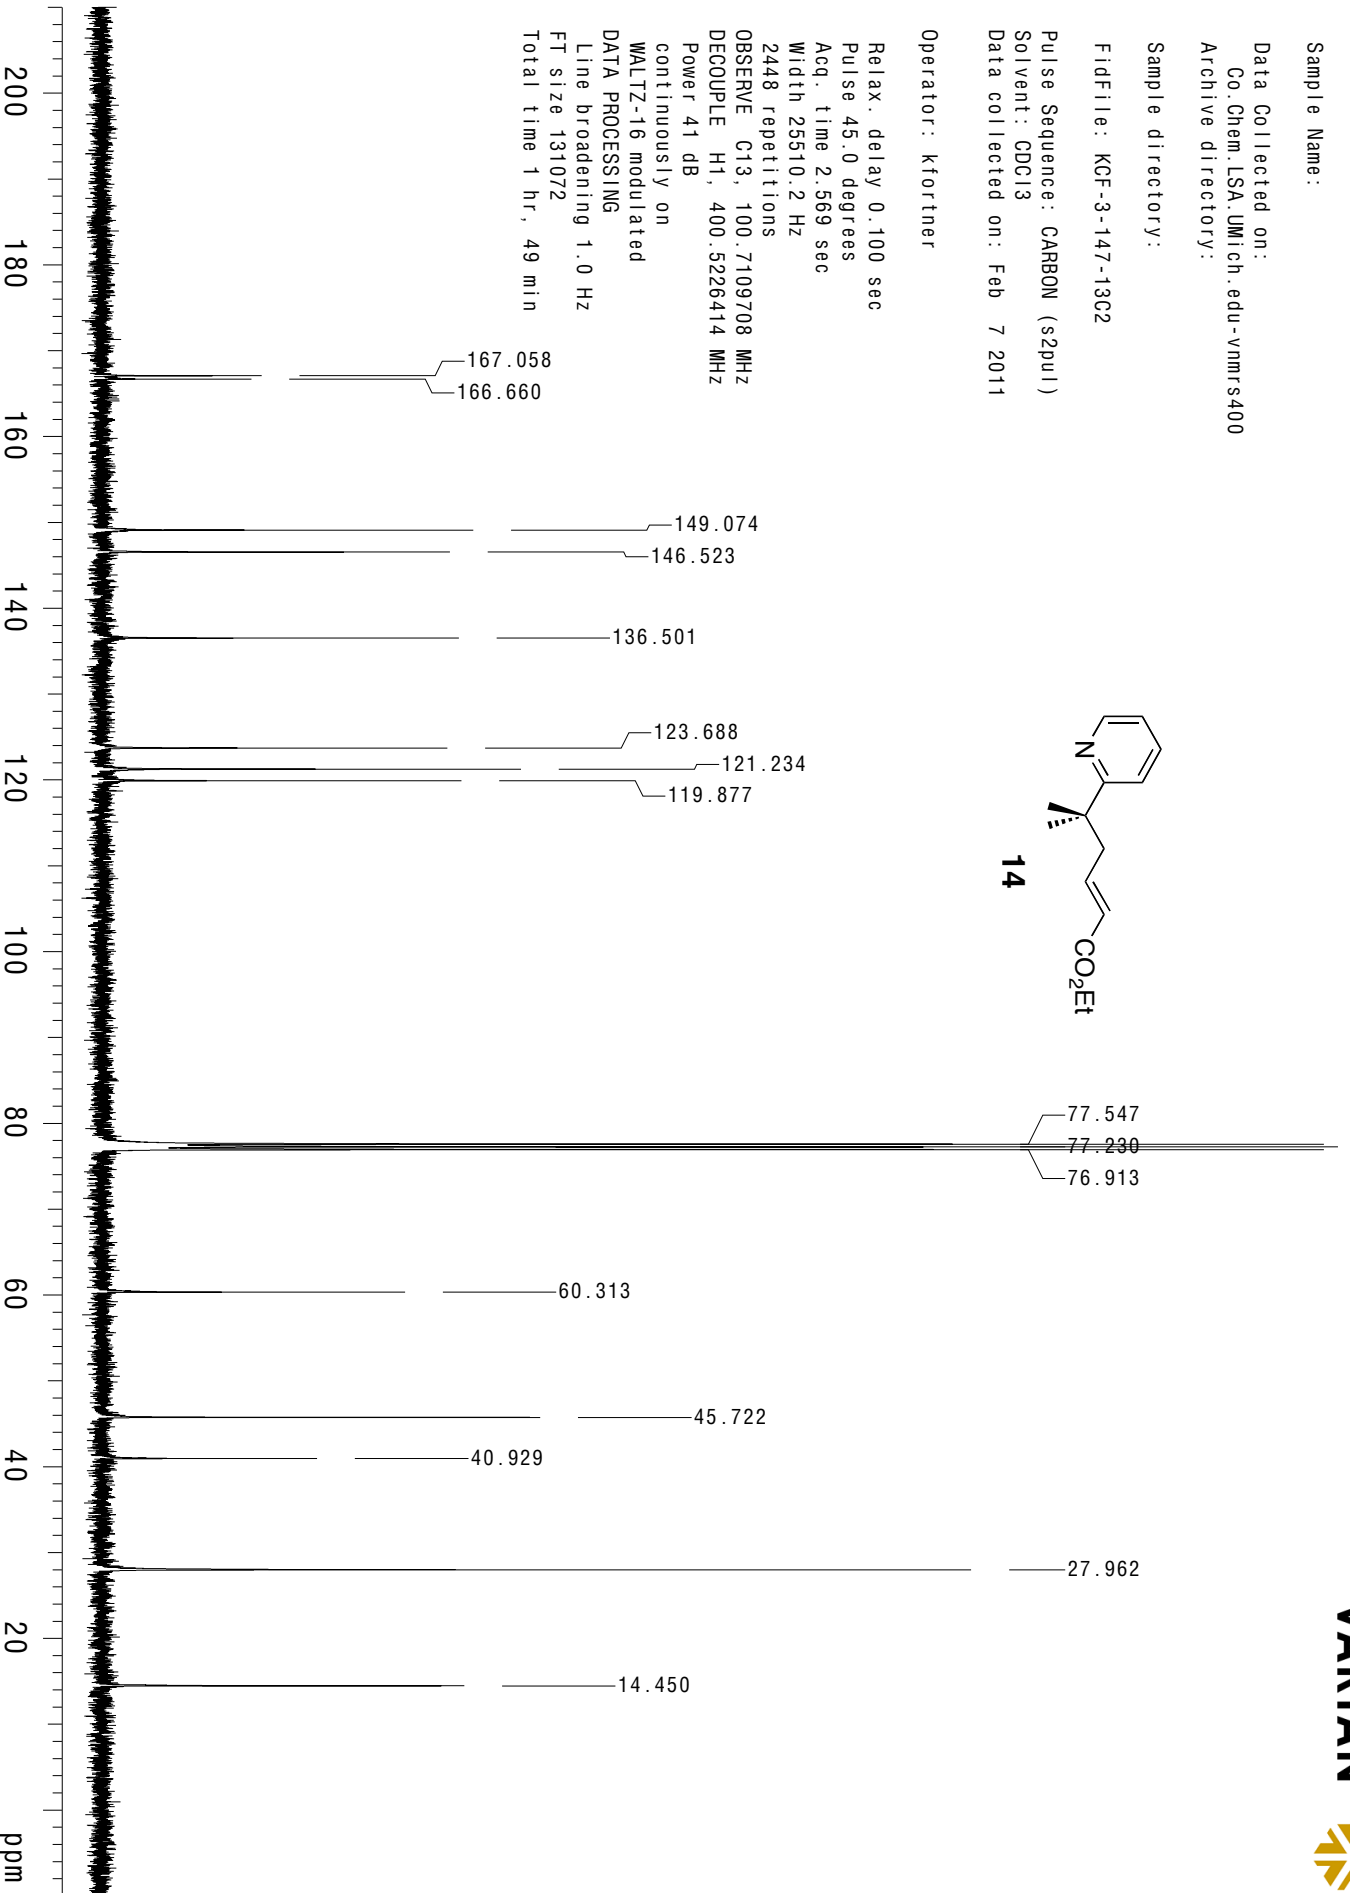

STANDARD 1H OBSERVE

Selective band center: 6.08 (ppm); width: 50.7 (Hz)

Sample Name:

Data Collected on:  
Ga.Chem.LSA.UMich.edu-vmrms400  
Archive directory:

Sample directory:

Fidfile: KCF-3-145-1H

Pulse Sequence: PROTON (s2pu1)  
Solvent: cdcl3  
Data collected on: Feb 6 2011

Operator: kfortner

Relax. delay 0.500 sec  
Pulse 45.0 degrees  
Acq. time 3.500 sec  
Width 6410.3 Hz  
64 repetitions  
OBSERVE H1, 399.5389187 MHz  
DATA PROCESSING  
Line broadening 0.3 Hz  
FT size 65536  
Total time 4 min 25 sec

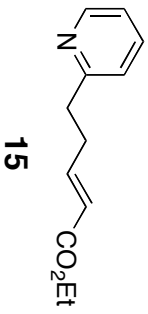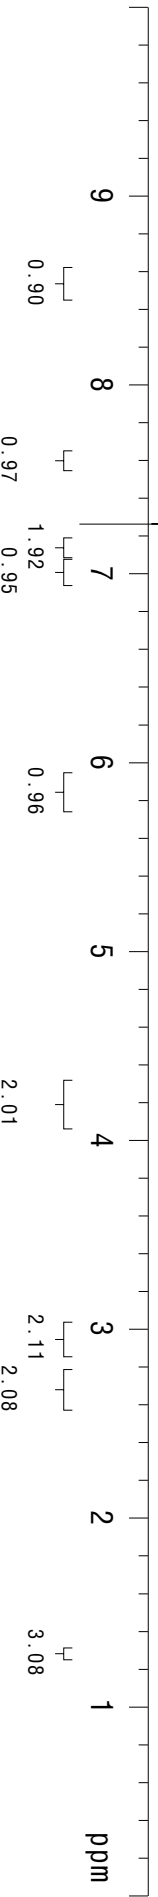

Automated Probe tuning parameter

Sample Name:

Data Collected on:  
Co.Chem.LSA.UMich.edu-vnmrs400  
Archive directory:

Sample directory:

FIDfile: KCF-3-145-13C

Pulse Sequence: CARBON (s2pul)  
Solvent: GDC13  
Data collected on: Feb 4 2011

Operator: kfortner

Relax. delay 0.100 sec  
Pulse 45.0 degrees  
Acq. time 2.569 sec  
Width 25510.2 Hz  
1232 repetitions  
OBSERVE C13, 100.7109731 MHz  
DECOUPLE H1, 400.5226414 MHz  
Power 41 dB  
continously on  
WALTZ-16 modulated  
DATA PROCESSING  
Line broadening 1.0 Hz  
FT size 131072  
Total time 54 min

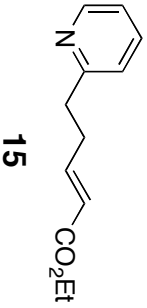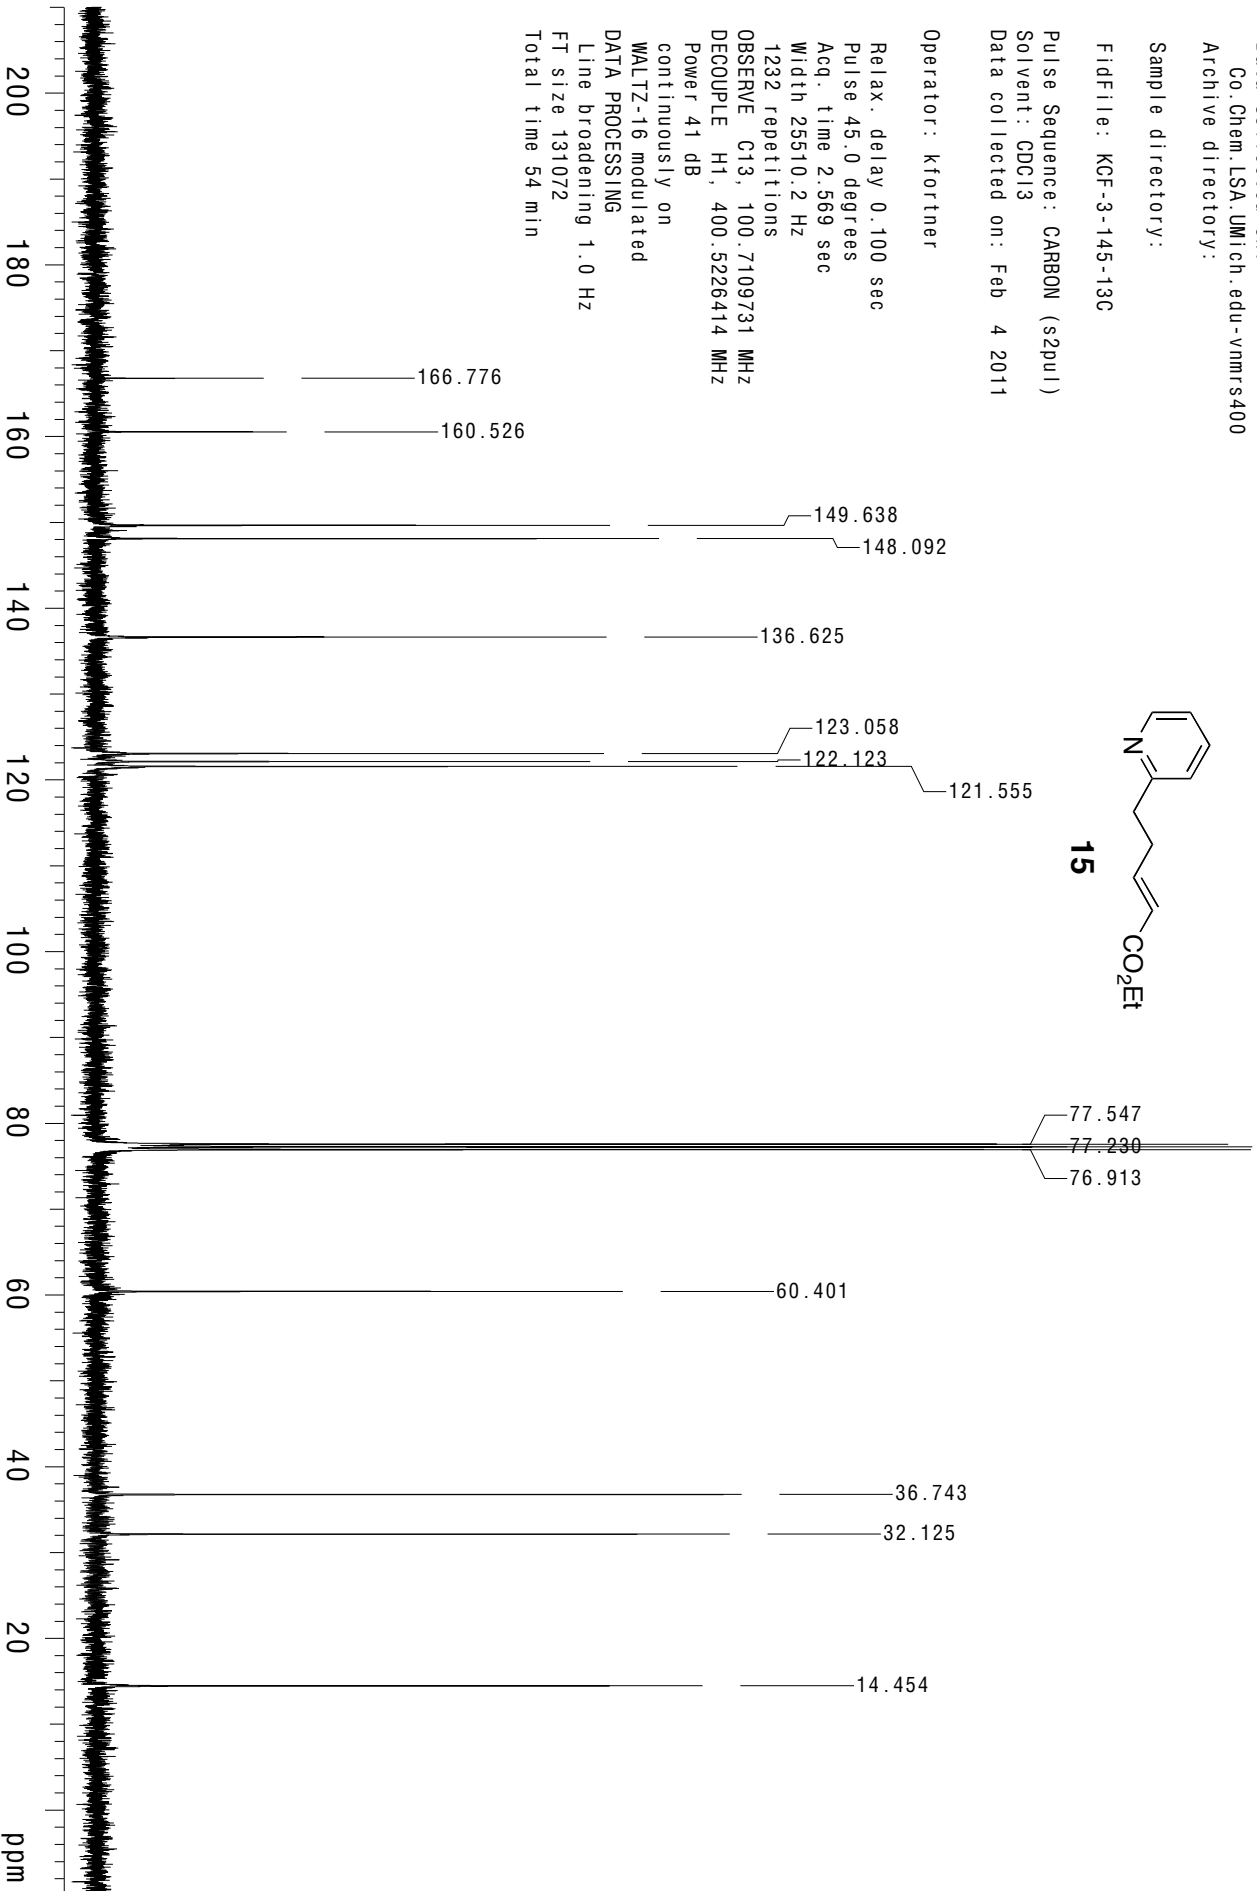

STANDARD 1H OBSERVE

Selective band center: 6.08 (ppm); width: 50.7 (Hz)

Sample Name:

Data Collected on:

Ga.Chem.LSA.UMich.edu-vmrfs400

Archive directory:

Sample directory:

Fidfile: KCF-3-117-1H

Pulse Sequence: PROTON (s2pul)

Solvent: cdcl3

Data collected on: Dec 11 2010

Operator: kfortner

Relax. delay 0.500 sec

Pulse 45.0 degrees

Acq. time 3.500 sec

Width 6410.3 Hz

64 repetitions

OBSERVE H1, 399.5389189 MHz

DATA PROCESSING

Line broadening 0.3 Hz

FT size 65536

Total time 4 min 25 sec

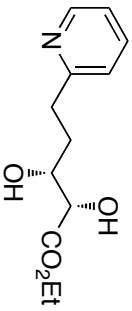

**16**

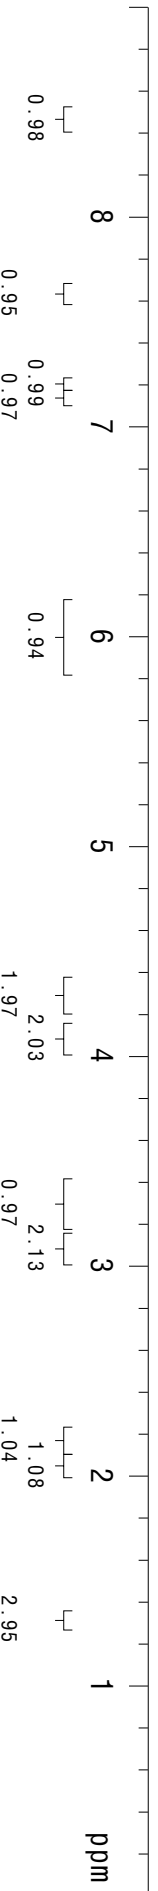



STANDARD 1H OBSERVE

Selective band center: 6.08 (ppm); width: 50.7 (Hz)

Sample Name:

Data Collected on:  
Ga.Chem.LSA.UMich.edu-vmrms400  
Archive directory:

Sample directory:

Fidfile: KCF-3-117-13C

Pulse Sequence: CARBON (s2pul)  
Solvent: cdcl3  
Data collected on: Dec 4 2010

Operator: kfortner

Relax. delay 0.100 sec  
Pulse 45.0 degrees  
Acq. time 2.569 sec  
Width 25510.2 Hz  
320 repetitions  
OBSERVE C13, 100.464129 MHz  
DECOUPLE H1, 399.5409236 MHz  
Power 35 dB  
continuously on  
WALTZ-16 modulated  
DATA PROCESSING  
Line broadening 1.0 Hz  
FT size 131072  
Total time 14 min

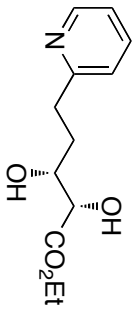

16

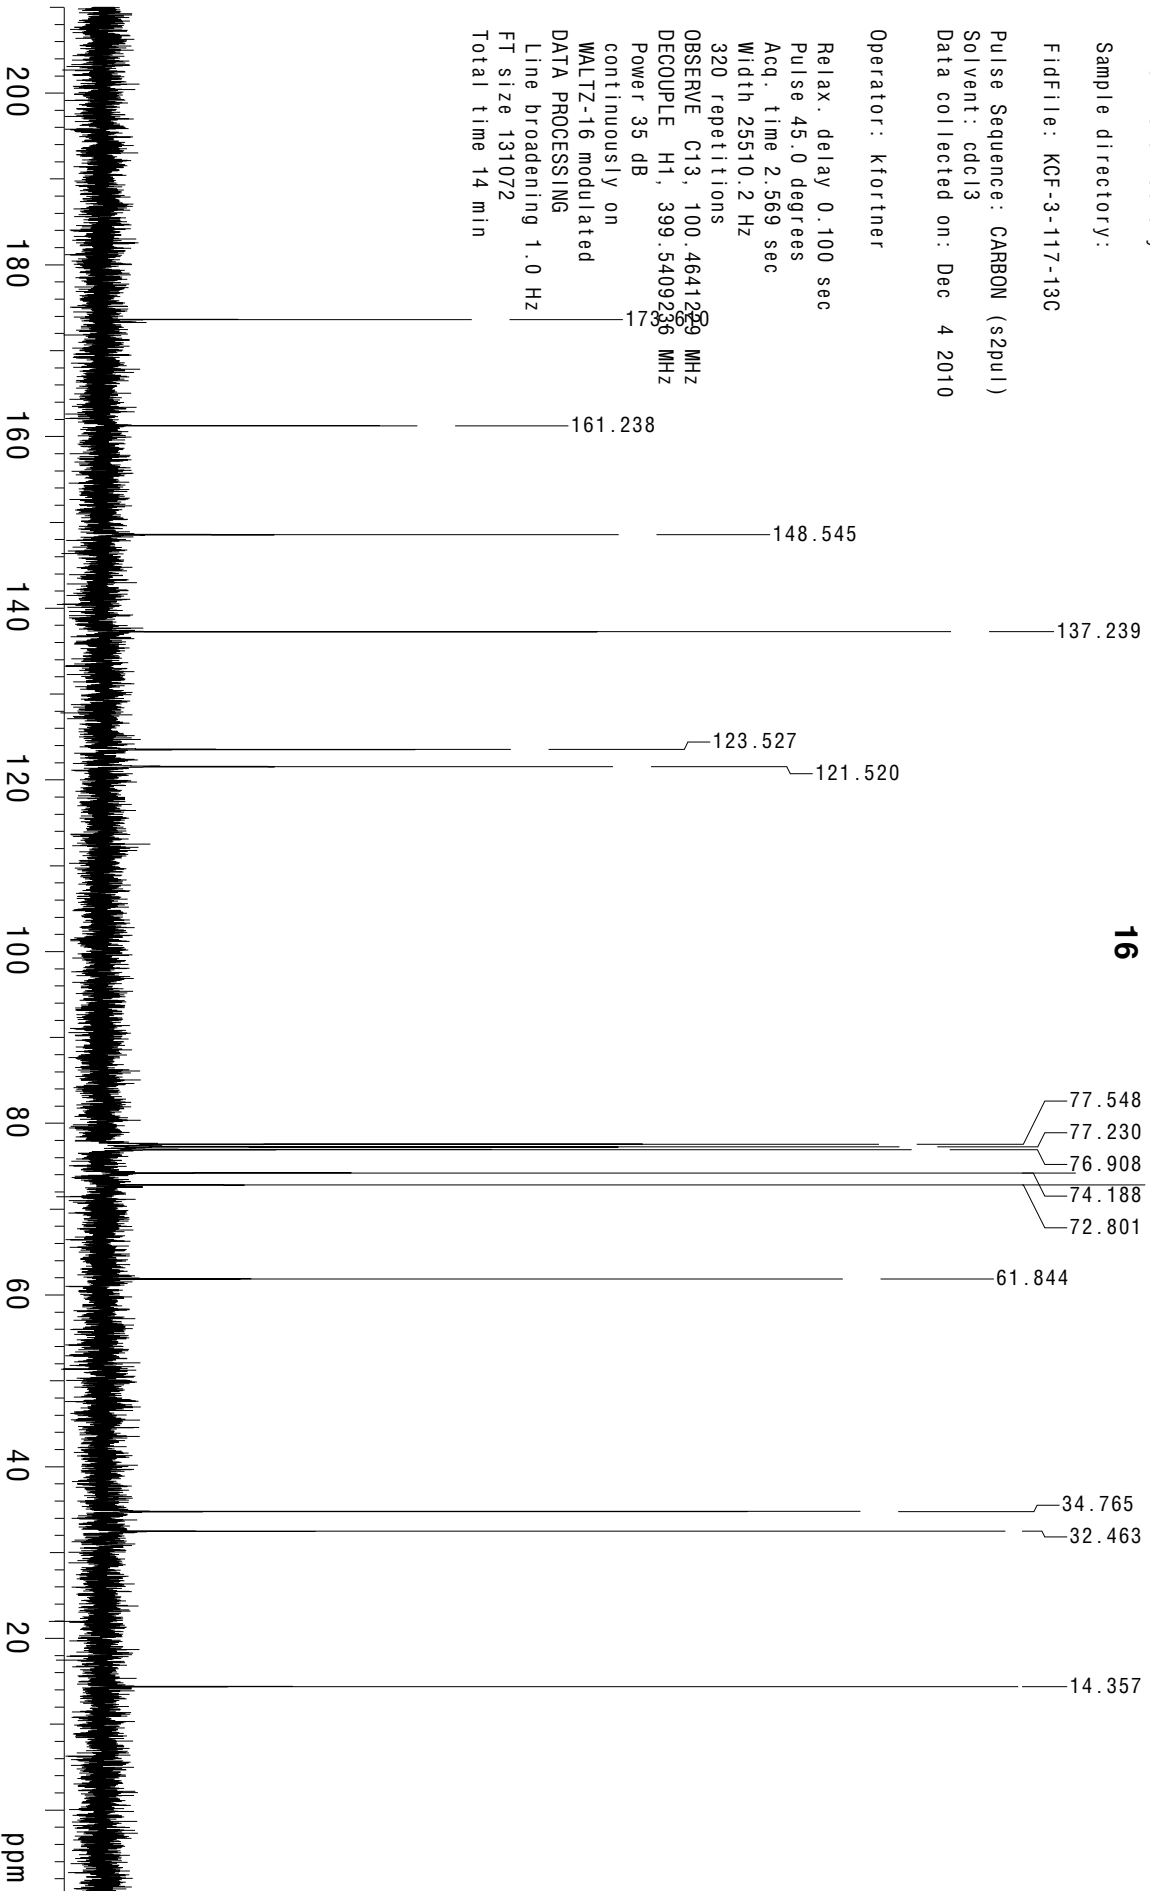

STANDARD PROTON PARAMETERS

Sample Name:

Data Collected on:  
 Sn.Chem.USA.UMich.edu-Inova500  
 Archive directory:

Sample directory:

FIDfile: KCF-3-129-1H

Pulse Sequence: PROTON (s2pu1)  
 Solvent: CDCl3  
 Data collected on: Jan 7 2011

Operator: kfortner

Relax. delay 0.500 sec  
 Pulse 45.0 degrees  
 Acq. time 3.500 sec  
 Width 7998.4 Hz  
 64 repetitions  
 OBSERVE H1, 499.9042609 MHz  
 DATA PROCESSING  
 Line broadening 0.3 Hz  
 FT size 65536  
 Total time 4 min 25 sec

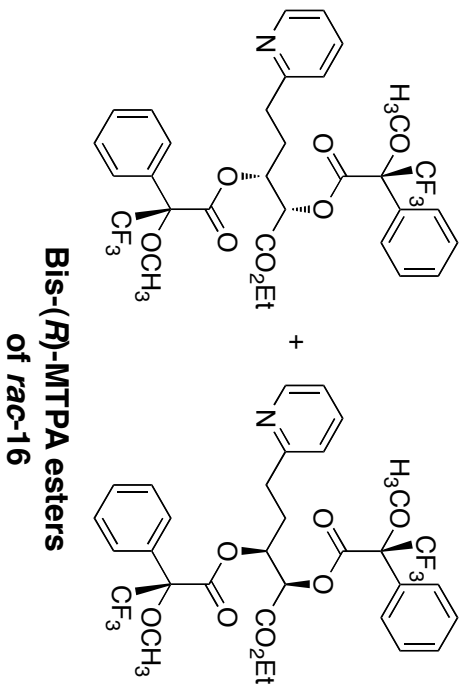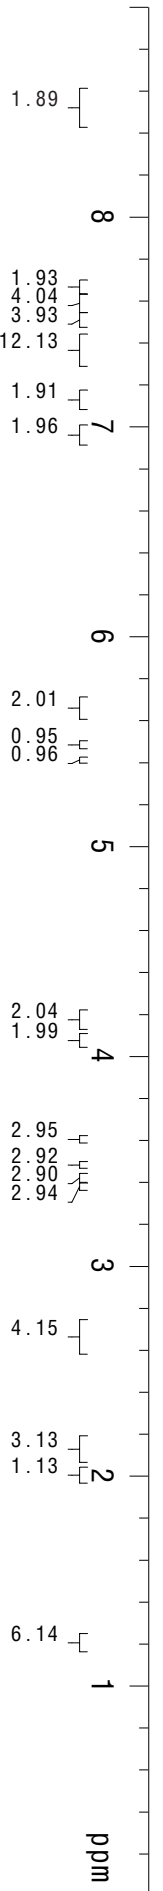

Automated Probe tuning parameter

Sample Name :

Data Collected on:  
Co.Chem.LSA.UMich.edu-vmrms400  
Archive directory:

Sample directory:

FidFile: KCF-3-129-13C

Pulse Sequence: CARBON (s2pu1)  
Solvent: GDC13  
Data collected on: Jan 2 2011

Operator: kfortner

Relax. delay 0.100 sec  
Pulse 45.0 degrees  
Acq. time 2.569 sec  
Width 25510.2 Hz  
3328 repetitions  
OBSERVE C13, 100.7109723 MHz  
DECOUPLE H1, 400.5226414 MHz  
Power 41 dB  
continously on  
WALTZ-16 modulated  
DATA PROCESSING  
Line broadening 1.0 Hz  
FT size 131072  
Total time 2 hr, 28 min

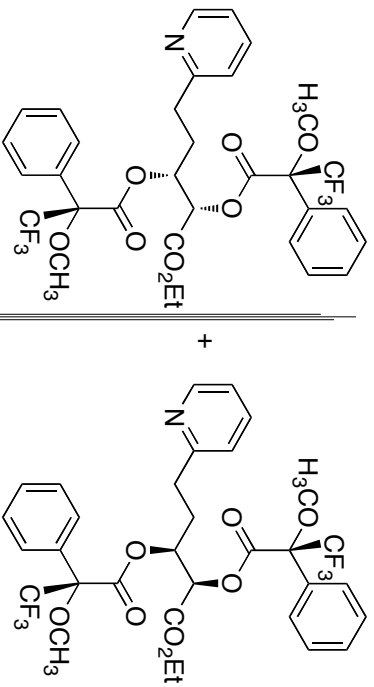

**Bis-(*R*)-MTPA esters  
of *rac*-16**

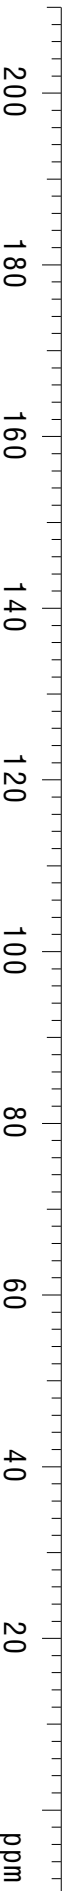

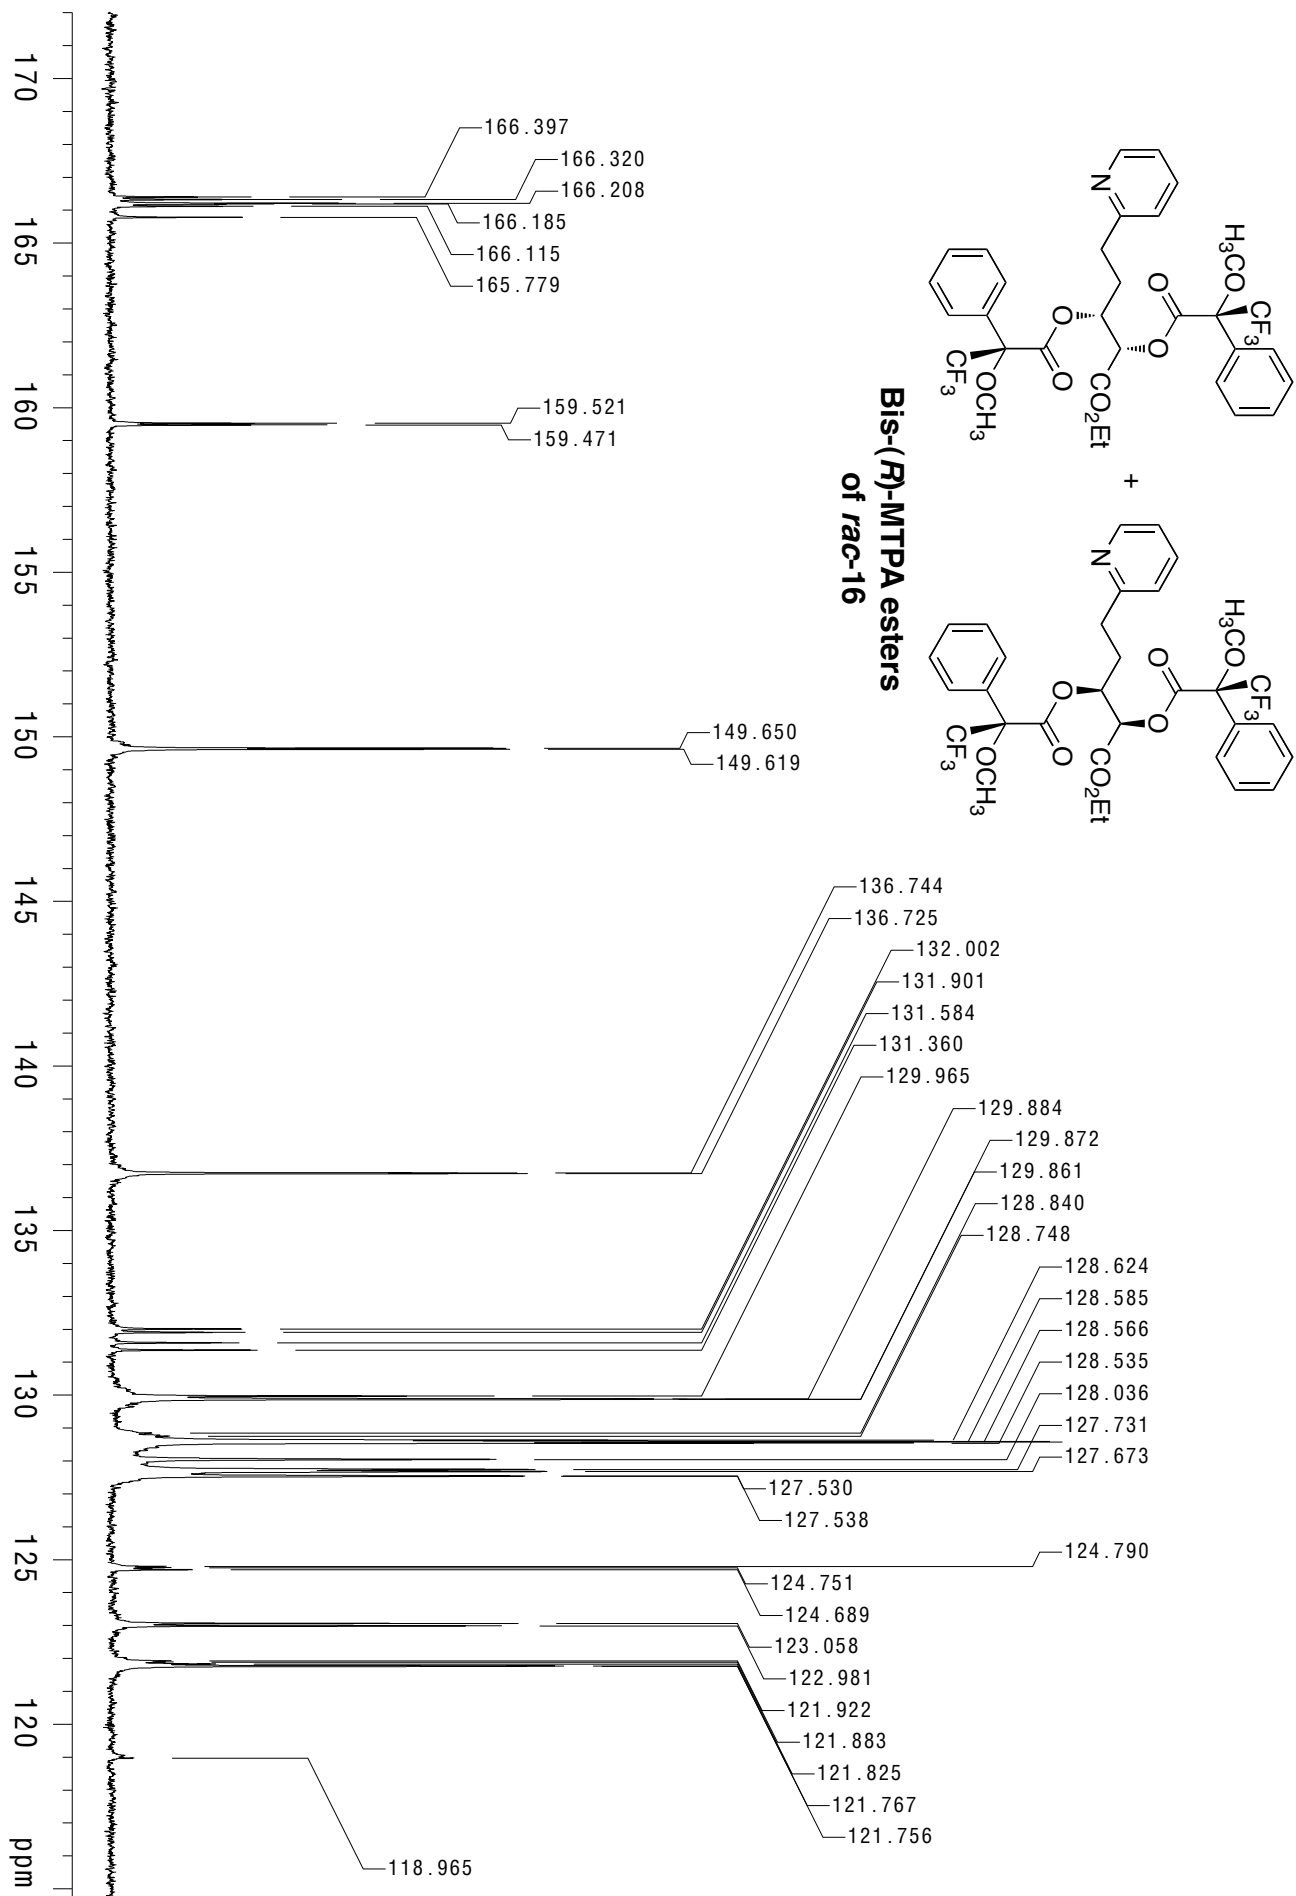

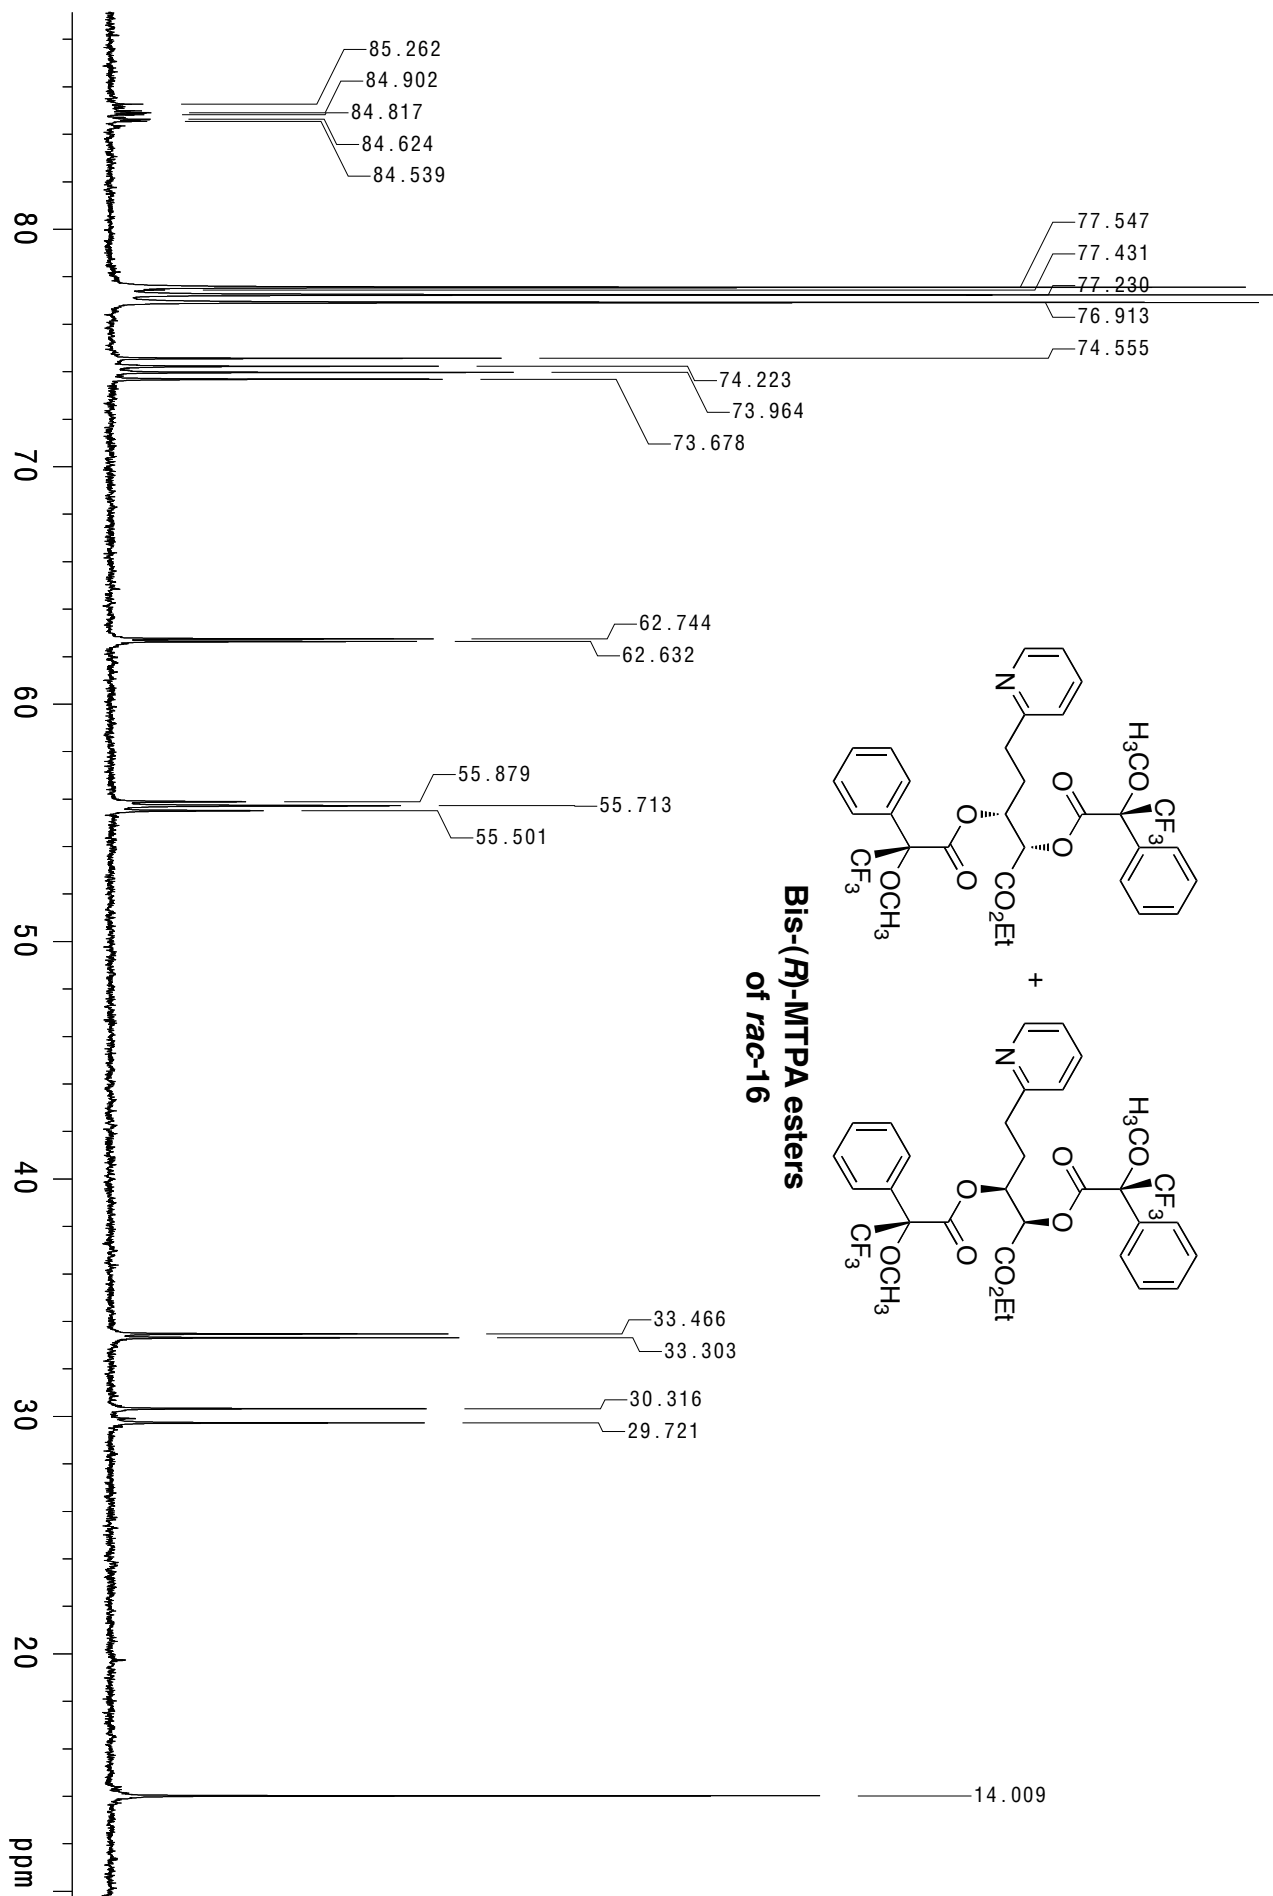

Automated Probe tuning parameter

Sample Name:

Data Collected on:  
Co.Chem.LSA.UMich.edu-vmr400  
Archive directory:

Sample directory:

FIDfile: KCF-3-129-19F

Pulse Sequence: FLUORINE (s2pul)  
Solvent: CDCl3  
Data collected on: Dec 21 2010

Operator: kfortner

Relax. delay 1.000 sec  
Pulse 30.0 degrees  
Acq. time 0.734 sec  
Width 89285.7 Hz  
64 repetitions  
OBSERVE F19, 376.8659339 MHz  
DATA PROCESSING  
Line broadening 1.5 Hz  
FT size 131072  
Total time 1 min 55 sec

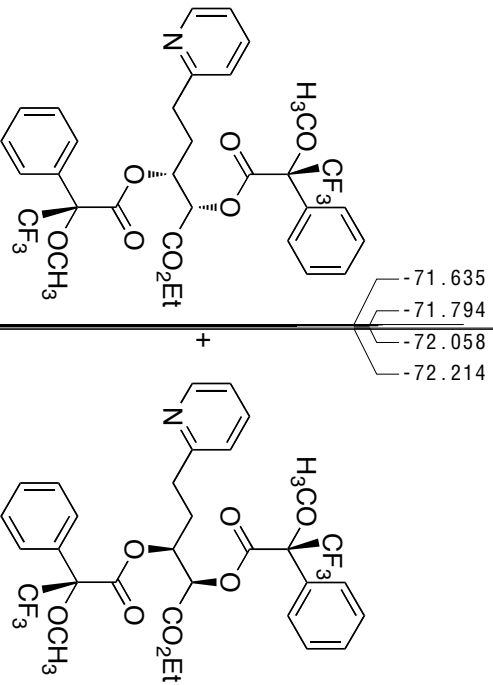

**Bis-(R)-MTPA esters  
of rac-16**

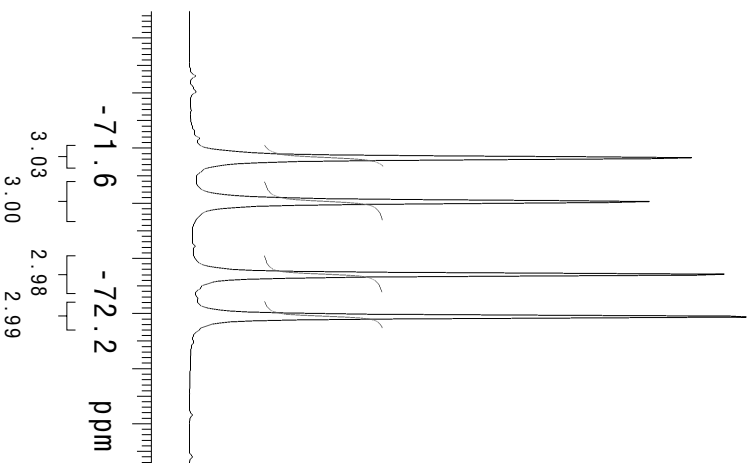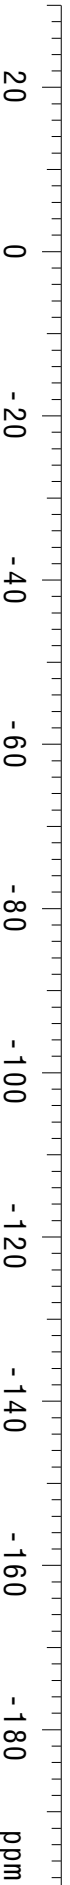

STANDARD PROTON PARAMETERS

Sample Name :

Data Collected on:  
 Sn.Chem.LSA.UMich.edu-Innova500  
 Archive directory:

Sample directory:

FIDfile: KCF-3-131-1H

Pulse Sequence: PROTON (s2pul)  
 Solvent: CDCl3  
 Data collected on: Jan 6 2011

Operator: kfortner

Relax. delay 0.500 sec  
 Pulse 45.0 degrees  
 Acq. time 3.500 sec  
 Width 7998.4 Hz  
 112 repetitions  
 OBSERVE H1, 499.9042611 MHZ  
 DATA PROCESSING  
 Line broadening 0.3 Hz  
 FT size 65536  
 Total time 7 min 37 sec

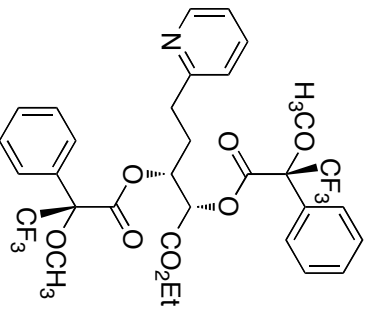

**Bis-(*R*)-MTPA ester of 16**

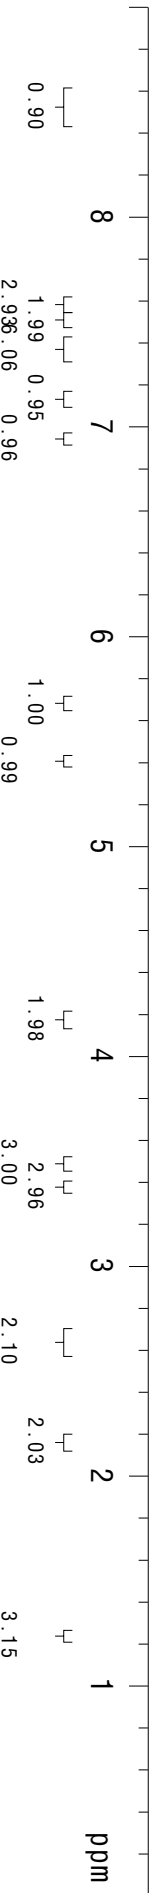

Automated Probe tuning parameter

Sample Name:

Data Collected on:  
Co.Chem.LSA.UMich.edu-vmr400

Archive directory:

Sample directory:

FIDfile: KCF-3-131-13C  
Pulse Sequence: CARBON (s2pul)  
Solvent: CDCl3  
Data collected on: Jan 7 2011

Operator: kfortner

Relax. delay 0.100 sec  
Pulse 45.0 degrees  
Acq. time 2.569 sec  
Width 25510.2 Hz  
3440 repetitions

OBSERVE C13, 100.7109704 MHz  
DECOUPLE H1, 400.5226414 MHz  
Power 41 dB  
continously on  
WALTZ-16 modulated

DATA PROCESSING  
Line broadening 1.0 Hz  
FT size 131072  
Total time 2 hr, 33 min

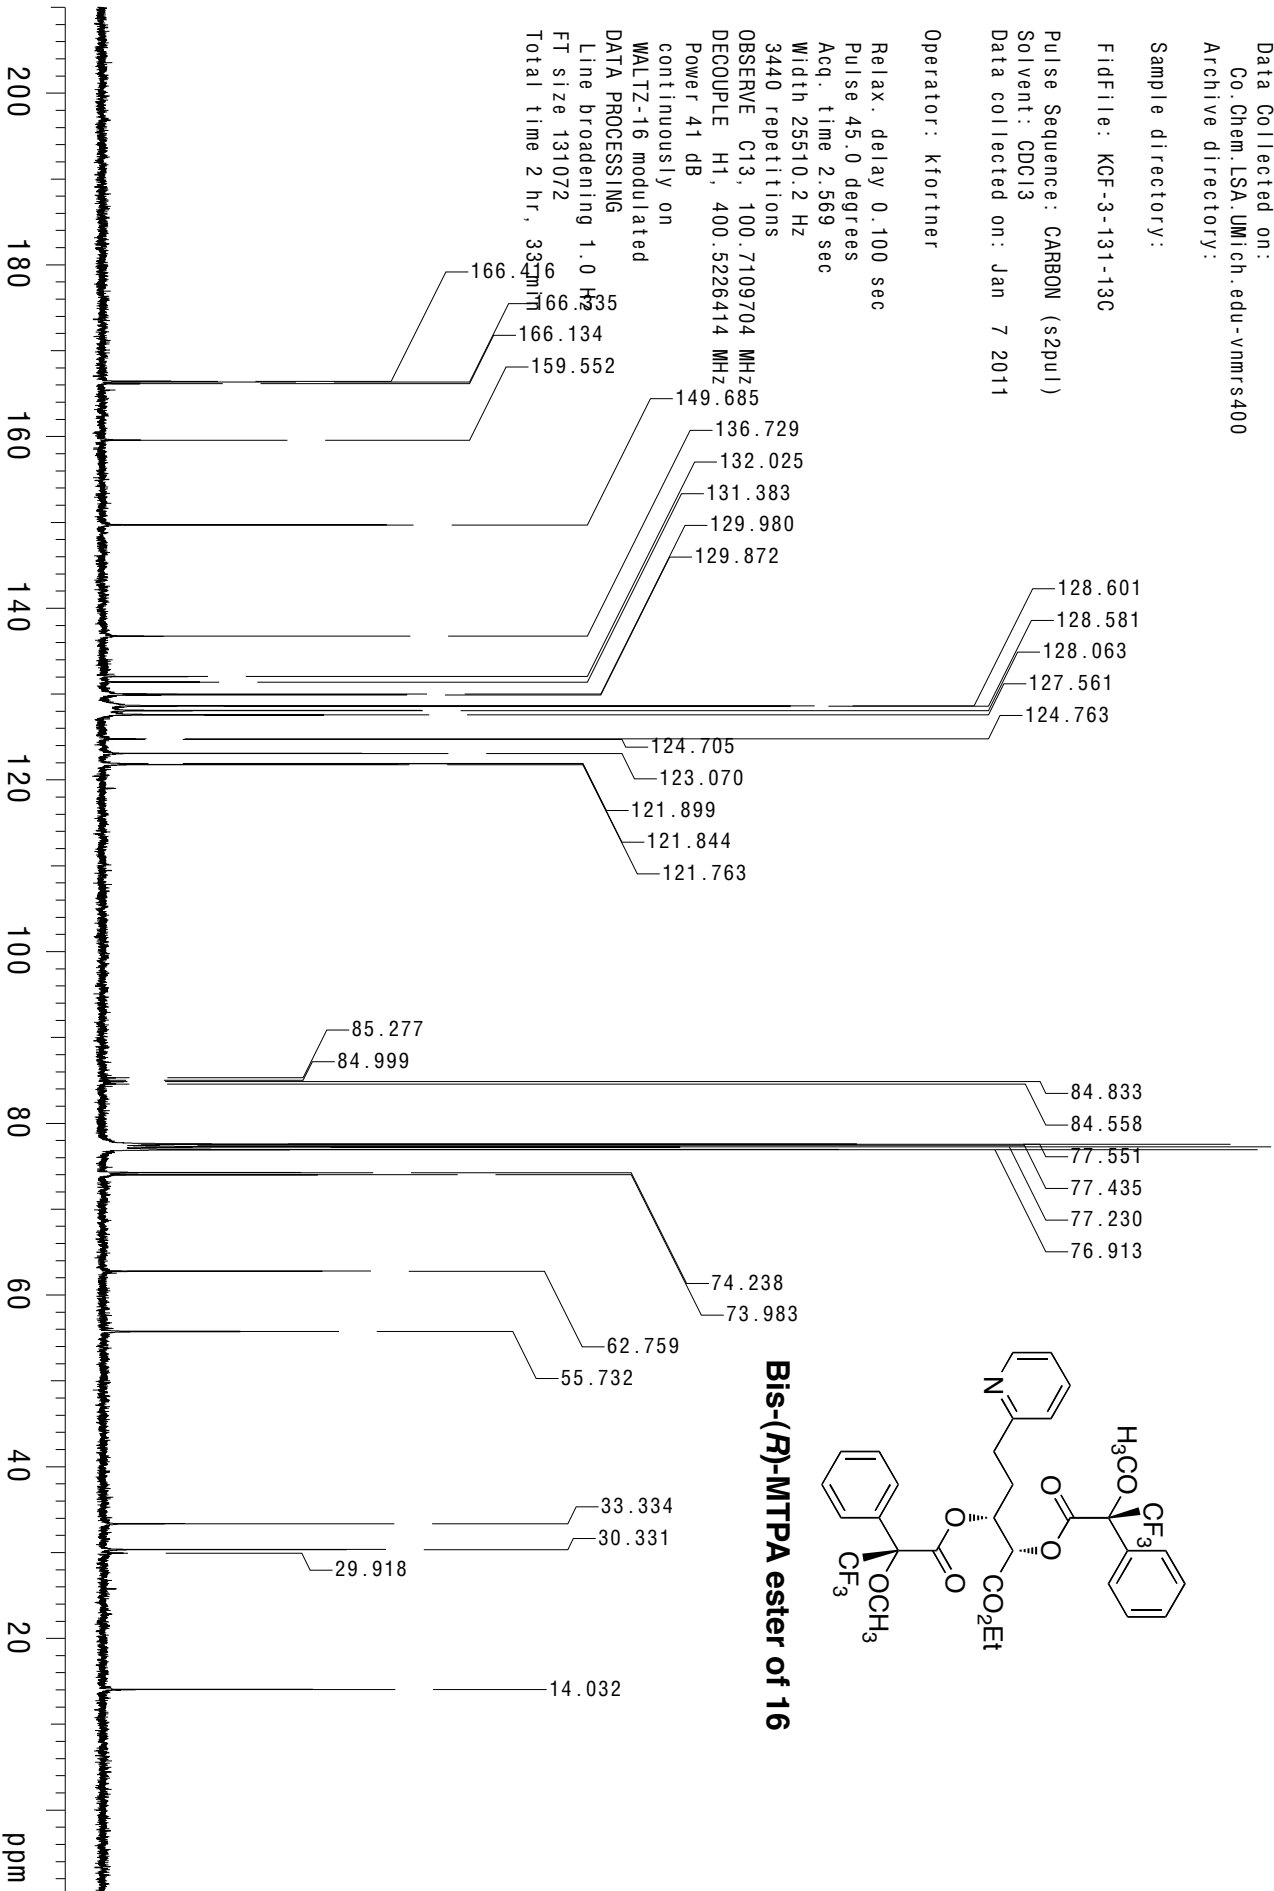

Bis-(R)-MTPA ester of 16

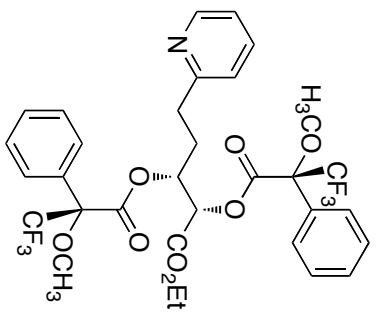



Automated Probe tuning parameter

Sample Name:

Data Collected on:  
Co.Chem.LSA.UMich.edu-vmrms400

Archive directory:

Sample directory:

FIDfile: KCF-3-131-19F

Pulse Sequence: FLUORINE (s2pul)  
Solvent: GDC13  
Data collected on: Jan 7 2011

Operator: kfortner

Relax. delay 1.000 sec  
Pulse 30.0 degrees  
Acq. time 0.734 sec  
Width 89285.7 Hz  
272 repetitions  
OBSERVE F19, 376.8659339 MHz  
DATA PROCESSING  
Line broadening 1.5 Hz  
FT size 131072  
Total time 7 min 58 sec

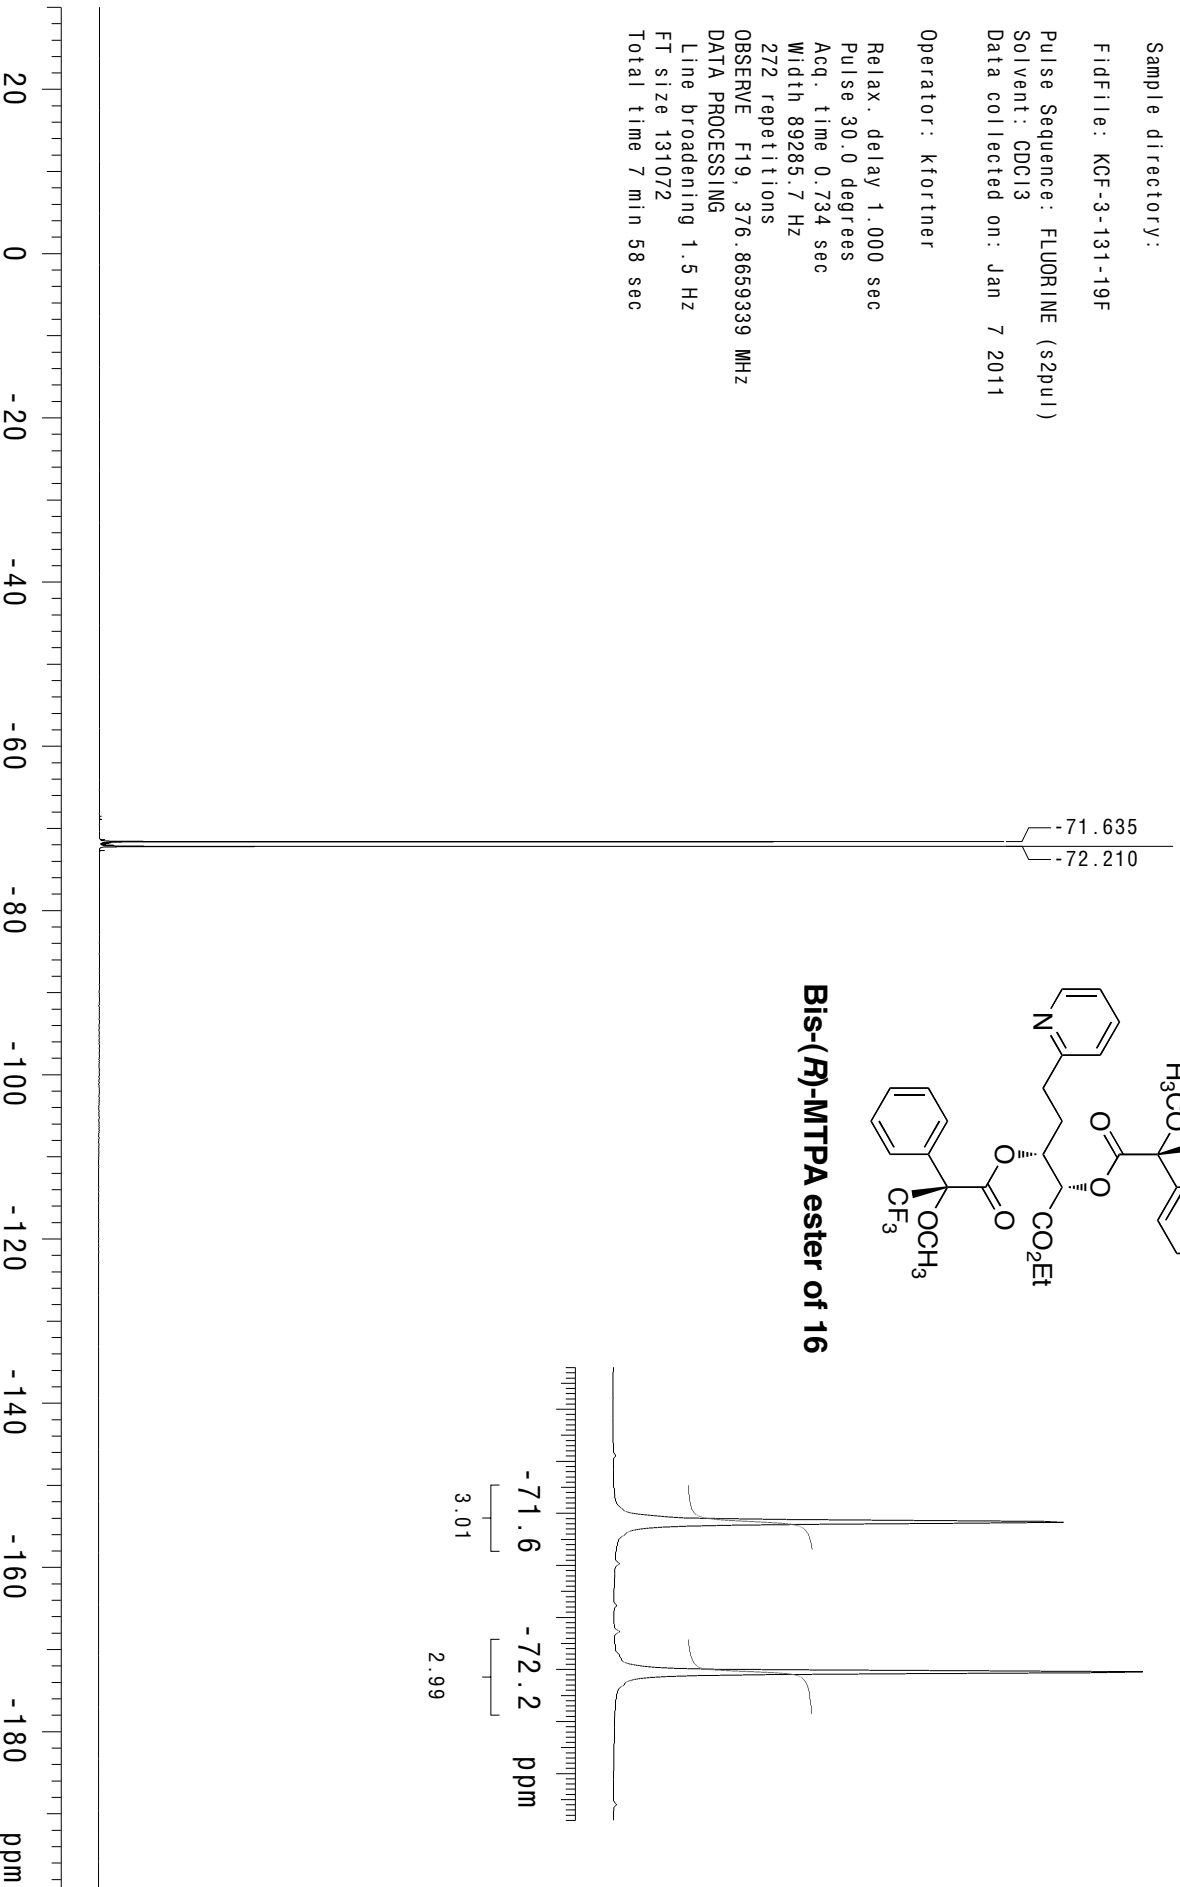

Sample Name :

Data Collected on:  
Zr.Chem.LSA.UMich.edu-inovva400  
Archive directory:

Sample directory:

Fidfile: 7kjs22-2

Pulse Sequence: PROTON (szpu1)  
Solvent: cdcl3  
Data collected on: May 11 2010

Operator: kstowers

Relax. delay 0.500 sec  
Pulse 45.0 degrees  
Acq. time 3.500 sec  
Width 6399.5 Hz  
8 repetitions  
OBSERVE H1, 399.9649442 MHz  
DATA PROCESSING  
Line broadening 0.3 Hz  
FT size 65536  
Total time 0 min 40 sec

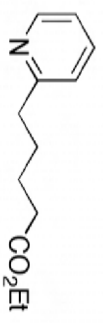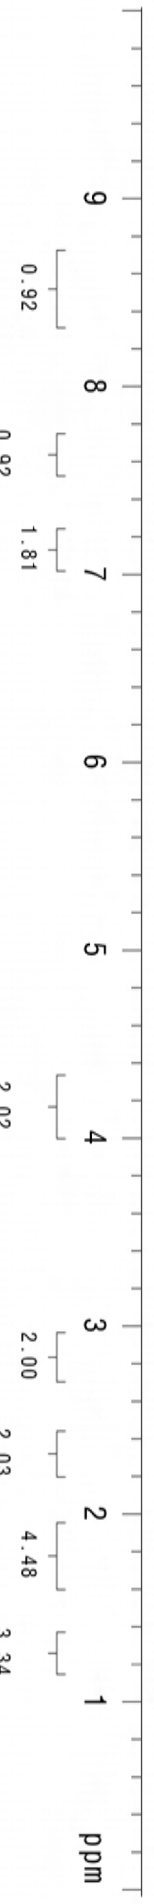

Sample Name:

Data Collected on:  
Ga. Chem. USA. UMich. edu -vnmr-s400  
Archive directory:

Sample directory:

Fidfile: Zkjs22-C

Pulse Sequence: CARBON (szpu1)  
Solvent: cdcl3  
Data collected on: May 11 2010

Temp. 23.0 C / 296.1 K  
Operator: kstowers

Relax. delay 0.100 sec  
Pulse 45.0 degrees  
Acq. time 2.569 sec  
Width 25510.2 Hz  
656 repetitions  
OBSERVE C13, 100.4641198 MHz  
DECOUPLE H1, 399.5409236 MHz  
Power 35 dB  
continuously on  
WALTZ-16 modulated  
DATA PROCESSING  
Line broadening 1.0 Hz  
FT size 131072  
Total time 29 min

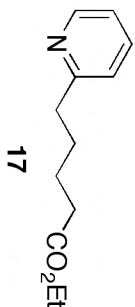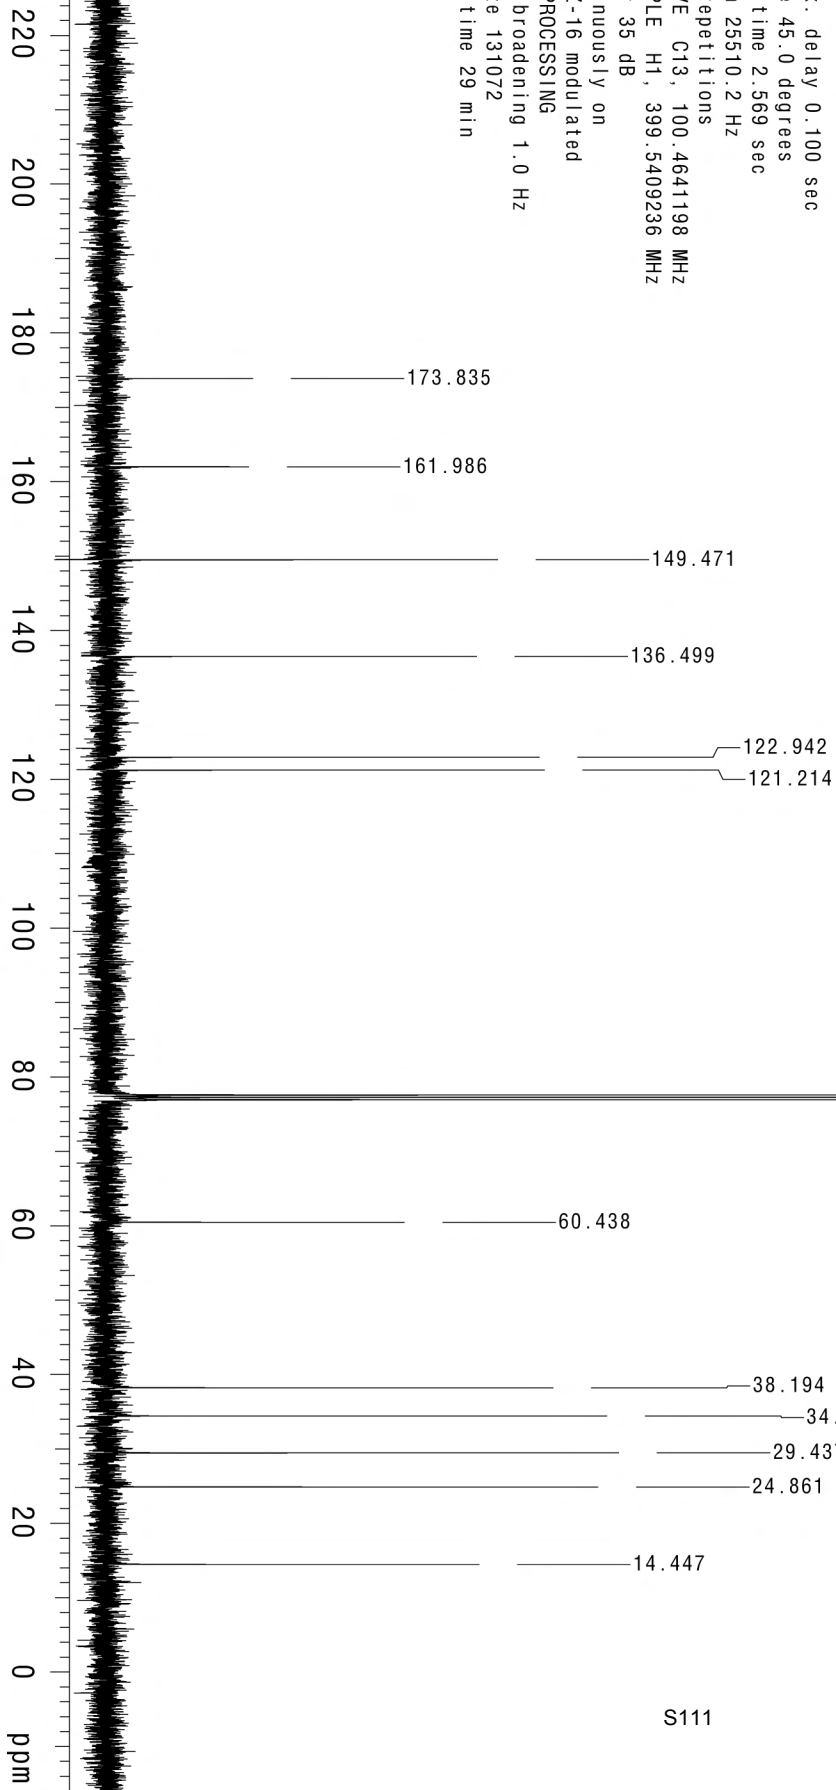

STANDARD 1H OBSERVE

Selective band center: 6.08 (ppm); width: 50.7 (Hz)

Sample Name:

Data Collected on:  
Ga.Chem.LSA.UMich.edu-vmrms400  
Archive directory:

Sample directory:

Fidfile: KCF-3-113-1H

Pulse Sequence: PROTON (s2pu1)  
Solvent: cdcl3  
Data collected on: Dec 4 2010

Operator: kfortner

Relax. delay 0.500 sec  
Pulse 45.0 degrees  
Acq. time 3.500 sec  
Width 6410.3 Hz  
16 repetitions  
OBSERVE H1, 399.5389189 MHz  
DATA PROCESSING  
Line broadening 0.3 Hz  
FT size 65536  
Total time 1 min 12 sec

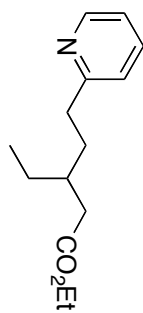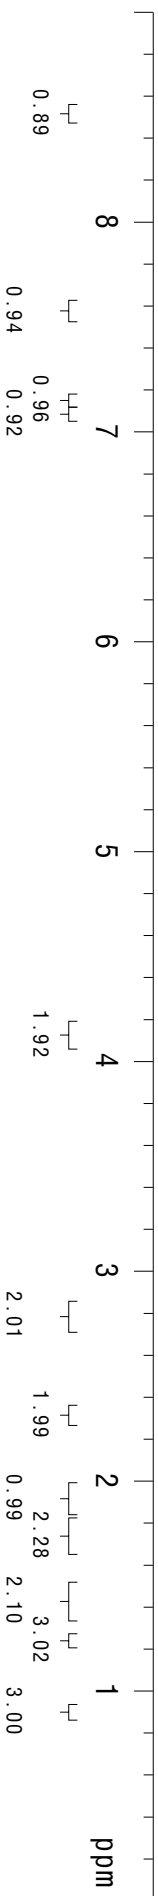

STANDARD 1H OBSERVE

Selective band center: 6.08 (ppm); width: 50.7 (Hz)

Sample Name:

Data Collected on:  
Ga.Chem.LSA.UMich.edu-vmrms400  
Archive directory:

Sample directory:

Fidfile: KCF-3-113-13C

Pulse Sequence: CARBON (s2pu1)  
Solvent: cdcl3  
Data collected on: Dec 4 2010

Operator: kfortner

Relax. delay 0.100 sec  
Pulse 45.0 degrees  
Acq. time 2.569 sec  
Width 25510.2 Hz  
128 repetitions

OBSERVE C13, 100.4641213 MHz  
DECOUPLE H1, 399.5409236 MHz  
Power 35 dB  
continuously on  
WALTZ-16 modulated  
DATA PROCESSING  
Line broadening 1.0 Hz  
FT size 131072  
Total time 5 min 43 sec

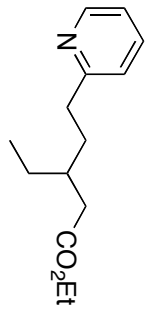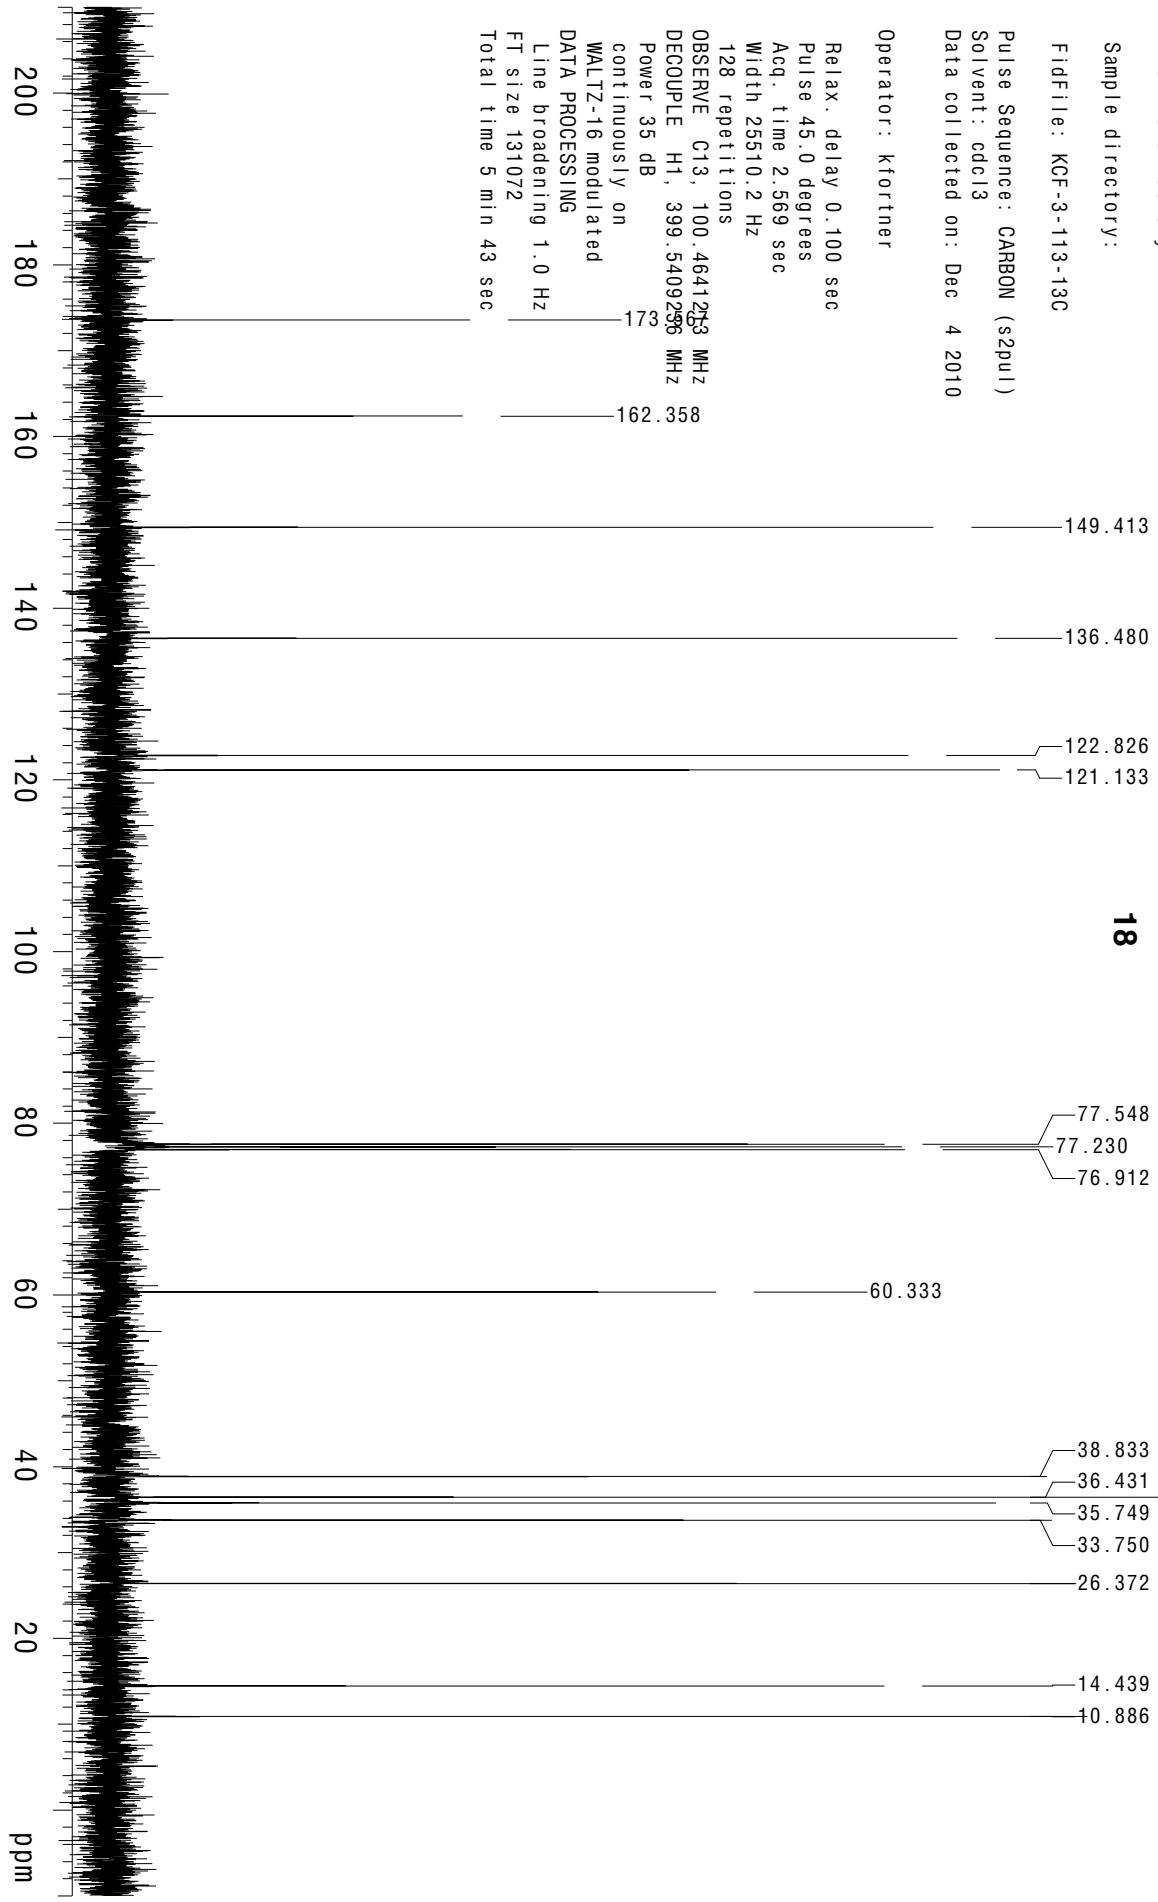

Supplement: NIHMS287954-supplement-1_si_001.pdf [file NIHMS287954-supplement-1_si_001.pdf]
